# Supplementary material for: Pediococcus acidilactici (pA1c®) alleviates obesity-related dyslipidemia and inflammation in Wistar rats by activating beta-oxidation and modulating the gut microbiota
Source: Royal Society of Chemistry journal article supplement (doi:10.1039/d3fo01651j), 2023-01-01
Supplement: d3fo01651j1.xlsx [file d3fo01651j1.xlsx]

## Sheet: Análisis
Id animal	Glucose (mg/dL)	Insulin (ug/L)	Glucosa (mmol/L)	Insulina (pmol/L)	INSULINA Uu/ml	HOMA	Chol (mg/dL)	HDL-Chol (mg/dL)	Tot Chol/HDL	Triglycer (mg/dL)	TG/HDL	AIP	ALT (U/L)	AST (U/L)		Promedio	Chol (mg/dL)	HDL-Chol (mg/dL)	% HDL-Chol (mg/dL)
CNT-01	134.79	0.58	7.48584	99.8623	14.379	4.78395	84	24.16	3.47682	57	2.35927	0.372778	44.4	174.4		CONTROL	87.25	23.6687	27.1275
CNT-02																HFS	100.2	22.6273	22.5821
CNT-03																CECT	83.4444	21.68	25.9814
CNT-04	141.39	1.17	7.85238	201.446	29.0059	10.1229	71	21.8	3.25688	49	2.24771	0.35174	38.4	195.3
CNT-05	129.91	0.91	7.21482	156.68	22.5602	7.23411	100	26.3	3.80228	62	2.35741	0.372436	40.2	161.1		Promedio	Chol (mg/dL)	HDL-Chol (mg/dL)	% HDL-Chol (mg/dL)
CNT-06	136.46	1.75	7.57858	301.309	43.385	14.6132	101	26.56	3.80271	50	1.88253	0.274742	44.6	170		CONTROL	11.0809	1.84719	7.80433
CNT-07	136.8	0.87	7.59747	149.793	21.5685	7.28294	98	23.26	4.21324	67	2.88048	0.459465	44.5	173.2		HFS	15.1643	2.62042	11.5808
CNT-08	133.36	0.64	7.40642	110.193	15.8665	5.22284	84	22.6	3.71681	54	2.38938	0.378285	47.9	159		CECT	13.8574	3.03946	14.0197
HFD-01	177.22	2.71	9.84227	466.598	67.1847	29.3889	112	24.45	4.58078	77	3.14928	0.498212	46.4	181
HFD-02	136.79	1.64	7.59691	282.369	40.6579	13.7278	86	21.59	3.98333	50	2.31589	0.364717	56	221.9
HFD-03	162.91	2.24	9.04754	385.675	55.5327	22.3304	113	23.18	4.87489	69	2.9767	0.473736	49.5	228.8
HFD-04	148.94	2.88	8.27169	495.868	71.3992	26.2485	115	25.09	4.5835	69	2.7501	0.439348	47.7	219
HFD-05	143.17	2.23	7.95124	383.953	55.2848	19.537	84	20.27	4.14406	69	3.40405	0.531995	46.1	199.5
HFD-06
HFD-07	129.75	1.67	7.20593	287.534	41.4016	13.2594	104	22.91	4.5395	74	3.23003	0.509207	43.3	183.2
HFD-08	134.21	1.85	7.45363	318.526	45.8641	15.1935	106	24.35	4.35318	62	2.5462	0.405893	47.7	204.4
HFD-09	156.75	2.62	8.70543	451.102	64.9535	25.131	122	27.56	4.42671	45	1.6328	0.212933	47.4	204.3
HFD-10	166.93	2.15	9.2708	370.179	53.3015	21.9621	108	23.27	4.64117	97	4.16846	0.619975	42.7	196
HFD-11
CECT-1	153.73	2.24	8.53771	385.675	55.5327	21.0721	85	23.88	3.55946	57	2.38693	0.377841	50.2	177.8
CECT-2	149.41	2.07	8.29779	356.405	51.3182	18.9257	82	21.18	3.87158	46	2.17186	0.336832	49	157.5
CECT-3
CECT-4	144.97	2.1	8.05121	361.57	52.062	18.6294	85	20.66	4.11423	43	2.08132	0.318338	41.5	192
CECT-5
CECT-6	124.15	1.15	6.89492	198.003	28.5101	8.73667	54	15.67	3.44608	37	2.3612	0.373133	51.3	187.2
CECT-7	142.53	2.9	7.91569	499.311	71.8951	25.2933	106	24.94	4.2502	60	2.40577	0.381255	51.1	212.2
CECT-8	146.21	2.33	8.12007	401.171	57.764	20.8466	93	23.96	3.88147	60	2.50417	0.398664	47.4	147.7
CECT-9	163.07	2.75	9.05643	473.485	68.1764	27.4415	78	20.54	3.79747	49	2.38559	0.377596	45.8	178
CECT-10	135.39	1.55	7.51916	266.873	38.4267	12.8416	80	19.49	4.10467	39	2.00103	0.301253	43.2	198.4
Promedio	Glucose (mg/dL)	Insulin (ug/L)	Glucosa (mmol/L)	Insulina (pmol/L)	INSULINA Uu/ml	HOMA	Chol (mg/dL)	HDL-Chol (mg/dL)	Tot Chol/HDL	Triglycer (mg/dL)	TG/HDL	AIP	ALT (U/L)	AST (U/L)
CONTROL	135.452	0.986667	7.52259	169.881	24.4609	8.20999	89.6667	24.1133	3.71146	56.5	2.3528	0.368241	43.3333	172.167
HFS	150.741	2.22111	8.37172	382.423	55.0645	20.7532	105.556	23.63	4.45857	68	2.90817	0.450669	47.4222	204.233
CECT	144.933	2.13625	8.04912	367.812	52.9606	19.2234	82.875	21.29	3.87814	48.875	2.28723	0.358114	47.4375	181.35
stdv	Glucose (mg/dL)	Insulin (ug/L)	Glucosa (mmol/L)	Insulina (pmol/L)	INSULINA Uu/ml	HOMA	Chol (mg/dL)	HDL-Chol (mg/dL)	Tot Chol/HDL	Triglycer (mg/dL)	TG/HDL	AIP	ALT (U/L)	AST (U/L)
CONTROL	3.83723	0.429263	0.213108	73.9089	10.642	3.66422	11.9778	1.95651	0.325603	7.00714	0.320015	0.059119	3.43841	12.9748
HFS	16.2654	0.449568	0.903332	77.4049	11.1454	5.76402	12.8073	2.09371	0.269411	15.2069	0.718855	0.11594	3.87517	16.6061
CECT	11.6912	0.576986	0.649295	99.3433	14.3043	6.11291	14.7012	2.99894	0.277818	9.21858	0.178817	0.0347282	3.67032	21.0952
n	Glucose (mg/dL)	Insulin (ug/L)	Glucosa (mmol/L)	Insulina (pmol/L)	INSULINA Uu/ml	HOMA	Chol (mg/dL)	HDL-Chol (mg/dL)	Tot Chol/HDL	Triglycer (mg/dL)	TG/HDL	AIP	ALT (U/L)	AST (U/L)
CONTROL	6	6	6	6	6	6	6	6	6	6	6	6	6	6
HFS	9	9	9	9	9	9	9	9	9	9	9	9	9	9
CECT	8	8	8	8	8	8	8	8	8	8	8	8	8	8
SEM	Glucose (mg/dL)	Insulin (ug/L)	Glucosa (mmol/L)	Insulina (pmol/L)	INSULINA Uu/ml	HOMA	Chol (mg/dL)	HDL-Chol (mg/dL)	Tot Chol/HDL	Triglycer (mg/dL)	TG/HDL	AIP	ALT (U/L)	AST (U/L)
CONTROL	1.56654	0.175246	0.087001	30.1732	4.34459	1.49591	4.8899	0.798743	0.132927	2.86065	0.130646	0.0241352	1.40373	5.29696
HFS	5.4218	0.149856	0.301111	25.8016	3.71514	1.92134	4.26911	0.697904	0.0898036	5.06897	0.239618	0.0386467	1.29172	5.53537
CECT	4.13347	0.203995	0.22956	35.1231	5.05733	2.16124	5.19766	1.06028	0.0982235	3.25926	0.0632212	0.0122783	1.29765	7.45826
