# Supplementary material for: Pediococcus acidilactici (pA1c®) alleviates obesity-related dyslipidemia and inflammation in Wistar rats by activating beta-oxidation and modulating the gut microbiota
Source: Royal Society of Chemistry journal article supplement (doi:10.1039/d3fo01651j), 2023-01-01
Supplement: d3fo01651j2.xlsx [file d3fo01651j2.xlsx]

## Sheet: TODOS DATOS
RATA	ID Animal	G-EPI	G.RETRO	G. SUBCUT	HÍGADO	BAZO	RIÑÓN	G.MESENT	GASTRO	Peso	Grasa visceral	Tratamiento	% vs PESO	ID Animal	G-EPI	G.RETRO	G. SUBCUT	HÍGADO	BAZO	RIÑÓN	G.MESENT	GASTRO	Grasa visceral
2	CECT-1	15.847	14.814	9.028	10.416	0.849	1.263	4.969	2.146	451.4	35.63	d		CECT-1	3.51063	3.28179	2	2.30749	0.188082	0.279796	1.1008	0.47541	7.89322
20	CECT-10	14.931	15.171	13.266	10.888	0.772	1.385	6.583	2.296	449.65	36.685	d		CECT-10	3.32058	3.37396	2.95029	2.42144	0.171689	0.308017	1.46403	0.510619	8.15857
4	CECT-2	13.051	12.985	8.386	10.679	0.67	1.183	3.838	2.081	439.01	29.874	d		CECT-2	2.97283	2.95779	1.91021	2.43252	0.152616	0.26947	0.87424	0.474021	6.80486
6	CECT-3	19.082	20.381	14.074	12.963	0.849	1.204	4.782	2.229	475.43	44.245	d		CECT-3	4.01363	4.28686	2.96027	2.72658	0.178575	0.253244	1.00583	0.468839	9.30631
8	CECT-4	17.619	16.641	14.034	11.729	0.915	1.267	6.244	2.444	493.07	40.504	d		CECT-4	3.57333	3.37498	2.84625	2.37877	0.185572	0.256961	1.26635	0.49567	8.21466
10	CECT-5	9.258	6.923	6.238	12.023	0.897	1.313	2.898	2.23	425.66	19.079	d		CECT-5	2.17498	1.62642	1.46549	2.82455	0.210732	0.308462	0.680825	0.523892	4.48222
12	CECT-6	9.913	10.478	7.91	9.502	0.677	1.1	4.192	2.267	435.08	24.583	d		CECT-6	2.27843	2.40829	1.81806	2.18397	0.155604	0.252827	0.963501	0.521054	5.65023
14	CECT-7	18.202	18.441	11.676	11.644	0.928	1.233	5.361	2.164	499.42	42.004	d		CECT-7	3.64463	3.69248	2.33791	2.3315	0.185816	0.246886	1.07345	0.433303	8.41056
16	CECT-8	19.098	14.707	9.324	11.876	0.918	1.421	4.437	2.509	485.64	38.242	d		CECT-8	3.93254	3.02837	1.91994	2.44543	0.189029	0.292604	0.91364	0.516638	7.87456
18	CECT-9	15.098	13.348	10.961	11.485	0.78	1.226	4.213	2.515	462.56	32.659	d		CECT-9	3.26401	2.88568	2.36964	2.48292	0.168627	0.265047	0.910801	0.543713	7.06049
1	CONTROL-1	4.5	3.523	4.224	10.145	0.772	1.219	0.173	2.396	426.35	8.196	c		CONTROL-1	1.05547	0.826316	0.990735	2.3795	0.181072	0.285915	0.040577	0.56198	1.92236
3	CONTROL-2	9.073	7.053	6.224	9.197	0.507	0.94	3.806	2.298	389.53	19.932	c		CONTROL-2	2.32922	1.81064	1.59782	2.36105	0.130157	0.241316	0.977075	0.589942	5.11694
5	CONTROL-3	6.724	4.736	4.671	8.913	0.644	0.951	2.187	2.196	399.08	13.647	c		CONTROL-3	1.68488	1.18673	1.17044	2.23339	0.161371	0.238298	0.54801	0.550266	3.41962
7	CONTROL-4	5.106	3.486	4.845	9.451	0.938	0.917	1.686	2.167	376.69	10.278	c		CONTROL-4	1.35549	0.925429	1.2862	2.50896	0.249011	0.243436	0.447583	0.575274	2.7285
9	CONTROL-5	8.722	8.672	7.063	10.604	0.724	1.5	2.495	2.534	449.14	19.889	c		CONTROL-5	1.94193	1.9308	1.57256	2.36096	0.161197	0.333972	0.555506	0.564189	4.42824
11	CONTROL-6	9.085	6.005	6.741	10.857	0.871	1.123	2.923	2.128	406.1	18.013	c		CONTROL-6	2.23713	1.4787	1.65994	2.67348	0.214479	0.276533	0.719773	0.524009	4.43561
13	CONTROL-7	8.067	7.231	5.585	9.572	0.537	1.045	3.071	2.253	417.55	18.369	c		CONTROL-7	1.93198	1.73177	1.33756	2.29242	0.128607	0.250269	0.735481	0.539576	4.39923
15	CONTROL-8	7.203	6.628	5.763	9.01	0.861	1.151	2.849	2.204	414.26	16.68	c		CONTROL-8	1.73876	1.59996	1.39116	2.17496	0.20784	0.277845	0.687732	0.532033	4.02646
2	HFS-1	12.463	13.566	11.238	14.062	0.806	1.296	5.256	2.336	480.43	31.285	h		HFS-1	2.59413	2.82372	2.33915	2.92696	0.167766	0.269758	1.09402	0.486231	6.51187
18	HFS-10	19.083	9.749	11.012	12.816	0.864	0.989	7.295	2.19	480.16	36.127	h		HFS-10	3.9743	2.03036	2.2934	2.66911	0.17994	0.205973	1.51929	0.456098	7.52395
4	HFS-2	19	14.047	8.936	12.037	1.003	1.451	6.052	2.281	486.98	39.099	h		HFS-2	3.9016	2.88451	1.83498	2.47176	0.205963	0.297959	1.24276	0.468397	8.02887
6	HFS-3	22.309	19.684	11.404	12.723	0.794	1.278	7.651	1.931	481.18	49.644	h		HFS-3	4.63631	4.09078	2.37001	2.64412	0.165011	0.265597	1.59005	0.401305	10.3171
8	HFS-4	11.876	16.855	14.381	12.888	0.786	1.324	7.1	2.031	481.32	35.831	h		HFS-4	2.46738	3.50183	2.98783	2.67764	0.163301	0.275077	1.47511	0.421965	7.44432
10	HFS-5	12.527	9.567	6.334	10.53	0.765	1.136	3.923	2.242	381.99	26.017	h		HFS-5	3.27941	2.50452	1.65816	2.75662	0.200267	0.29739	1.02699	0.586926	6.81091
12	HFS-6	12.12	8.628	7.757	10.522	0.786	1.302	5.091	2.131	453.51	25.839	h		HFS-6	2.67249	1.90249	1.71044	2.32013	0.173315	0.287094	1.12258	0.46989	5.69756
14	HFS-7	13.442	15.042	9.935	8.332	0.674	1.06	4.453	2.087	423.65	32.937	h		HFS-7	3.1729	3.55057	2.3451	1.96672	0.159094	0.250207	1.0511	0.492624	7.77458
16	HFS-8	11.884	11.774	8.461	8.415	0.77	0.993	5.166	1.94	358.01	28.824	h		HFS-8	3.31946	3.28873	2.36334	2.35049	0.215078	0.277367	1.44298	0.541884	8.05117
17	HFS-9	19.59	15.385	12.989	11.841	0.746	1.368	6.178	2.393	498.15	41.153	h		HFS-9	3.93255	3.08843	2.60745	2.37699	0.149754	0.274616	1.24019	0.480377	8.26117
19	HFS-9	13.967	16.101	11.868	10.747	0.774	1.419	5.302	2.56	481.43	35.37	h		HFS-9	2.90115	3.34441	2.46516	2.23231	0.160771	0.294747	1.1013	0.531749	7.34686
	Promedio	G-EPI	G.RETRO	G. SUBCUT	HÍGADO	BAZO	RIÑÓN	G.MESENT	GASTRO	Peso	Grasa visceral			Promedio	G-EPI	G.RETRO	G. SUBCUT	HÍGADO	BAZO	RIÑÓN	G.MESENT	GASTRO	Grasa visceral
	CONTROL	7.31	5.91675	5.6395	9.71863	0.73175	1.10575	2.39875	2.272	409.837	15.6255			CONTROL	1.78436	1.43629	1.3758	2.37309	0.179217	0.268448	0.588967	0.554659	3.80962
	HFS	15.2965	13.6725	10.3923	11.3557	0.797091	1.23782	5.76973	2.19291	455.165	34.7387			HFS	3.35015	3.00094	2.27046	2.49026	0.176387	0.272344	1.26421	0.485222	7.61531
	CECT	15.2099	14.3889	10.4897	11.3205	0.8255	1.2595	4.7517	2.2881	461.692	34.3505			CECT	3.26856	3.09166	2.25781	2.45352	0.178634	0.273332	1.02535	0.496316	7.38557
	stdv	G-EPI	G.RETRO	G. SUBCUT	HÍGADO	BAZO	RIÑÓN	G.MESENT	GASTRO	Peso	Grasa visceral			stdv	G-EPI	G.RETRO	G. SUBCUT	HÍGADO	BAZO	RIÑÓN	G.MESENT	GASTRO	Grasa visceral
	CONTROL	1.77016	1.85765	1.01224	0.73465	0.15877	0.193221	1.09713	0.134811	22.4793	4.45245			CONTROL	0.426896	0.413332	0.229569	0.1578	0.0423401	0.032411	0.273202	0.0224004	1.05295
	HFS	3.87303	3.44128	2.37545	1.84151	0.0820176	0.166012	1.19723	0.194748	46.865	7.00909			HFS	0.688193	0.662509	0.396688	0.27472	0.0214272	0.026435	0.206388	0.0531115	1.17283
	CECT	3.55131	3.83521	2.73657	0.973089	0.0968702	0.0948452	1.10421	0.152914	25.6967	7.94493			CECT	0.628524	0.719867	0.522895	0.191222	0.0172658	0.0229135	0.218547	0.0331607	1.43005
	n	G-EPI	G.RETRO	G. SUBCUT	HÍGADO	BAZO	RIÑÓN	G.MESENT	GASTRO	Peso	Grasa visceral			n	G-EPI	G.RETRO	G. SUBCUT	HÍGADO	BAZO	RIÑÓN	G.MESENT	GASTRO	Grasa visceral
	CONTROL	8	8	8	8	8	8	8	8	8	8			CONTROL	8	8	8	8	8	8	8	8	8
	HFS	11	11	11	11	11	11	11	11	11	11			HFS	11	11	11	11	11	11	11	11	11
	CECT	10	10	10	10	10	10	10	10	10	10			CECT	10	10	10	10	10	10	10	10	10
	SEM	G-EPI	G.RETRO	G. SUBCUT	HÍGADO	BAZO	RIÑÓN	G.MESENT	GASTRO	Peso	Grasa visceral			SEM	G-EPI	G.RETRO	G. SUBCUT	HÍGADO	BAZO	RIÑÓN	G.MESENT	GASTRO	Grasa visceral
	CONTROL	0.625844	0.65678	0.35788	0.259738	0.0561337	0.0683141	0.387895	0.0476629	7.94763	1.57418			CONTROL	0.15093	0.146135	0.081165	0.0557909	0.0149695	0.011459	0.0965917	0.00791972	0.372274
	HFS	1.16776	1.03759	0.716224	0.555235	0.0247292	0.0500545	0.360979	0.0587188	14.1303	2.11332			HFS	0.207498	0.199754	0.119606	0.0828313	0.00646055	0.00797046	0.0622283	0.0160137	0.353623
	CECT	1.12302	1.2128	0.865379	0.307718	0.030633	0.0299927	0.349182	0.0483557	8.12601	2.51241			CECT	0.198757	0.227642	0.165354	0.0604696	0.00545994	0.00724589	0.0691106	0.0104863	0.452221

## Sheet: OUTLIERS
RATA	ID Animal	G-EPI	G.RETRO	G. SUBCUT	HÍGADO	BAZO	RIÑÓN	G.MESENT	GASTRO	Peso	Grasa visceral	Grasa total	Tratamiento	% vs PESO	ID Animal	G-EPI	G.RETRO	G. SUBCUT	HÍGADO	BAZO	RIÑÓN	G.MESENT	GASTRO	Grasa visceral	Grasa TOTAL	Tratamiento
2	CECT-1	15.847	14.814	9.028	10.416	0.849	1.263	4.969	2.146	451.4	35.63	44.658	d		CECT-1	3.51063	3.28179	2	2.30749	0.188082	0.279796	1.1008	0.47541	7.89322	9.89322	6
20	CECT-10	14.931	15.171	13.266	10.888	0.772	1.385	6.583	2.296	449.65	36.685	49.951	d		CECT-10	3.32058	3.37396	2.95029	2.42144	0.171689	0.308017	1.00583	0.510619	8.15857	11.1089	6
4	CECT-2	13.051	12.985	8.386	10.679	0.67	1.183	3.838	2.081	439.01	29.874	38.26	d		CECT-2	2.97283	2.95779	1.91021	2.43252	0.152616	0.26947	0.87424	0.474021	6.80486	8.71506	6
													d		CECT-3											6
8	CECT-4	17.619	16.641	14.034	11.729	0.915	1.267	6.244	2.444	493.07	40.504	54.538	d		CECT-4	3.57333	3.37498	2.84625	2.37877	0.185572	0.256961	1.26635	0.49567	8.21466	11.0609	6
10	CECT-5	9.258	6.923	6.238	12.023	0.897	1.313	2.898	2.23	425.66	19.079	25.317	d		CECT-5	2.17498	1.62642	1.46549	2.82455	0.210732	0.308462	0.680825	0.523892	4.48222	5.9477	6
12	CECT-6	9.913	10.478	7.91	9.502	0.677	1.1	4.192	2.267	435.08	24.583	32.493	d		CECT-6	2.27843	2.40829	1.81806	2.18397	0.155604	0.252827	0.963501	0.521054	5.65023	7.46828	6
14	CECT-7	18.202	18.441	11.676	11.644	0.928	1.233	5.361	2.164	499.42	42.004	53.68	d		CECT-7	3.64463	3.69248	2.33791	2.3315	0.185816	0.246886	1.07345		8.41056	10.7485	6
16	CECT-8	19.098	14.707	9.324	11.876	0.918	1.421	4.437	2.509	485.64	38.242	47.566	d		CECT-8	3.93254	3.02837	1.91994	2.44543	0.189029	0.292604	0.91364	0.516638	7.87456	9.7945	6
18	CECT-9	15.098	13.348	10.961	11.485	0.78	1.226	4.213	2.515	462.56	32.659	43.62	d		CECT-9	3.26401	2.88568	2.36964	2.48292	0.168627	0.265047	0.910801	0.543713	7.06049	9.43013	6
1	CONTROL-1	4.5	3.523	4.224	10.145	0.772	1.219	0.173	2.396	426.35	8.196	12.42	c		CONTROL-1	1.05547	0.826316	0.990735	2.3795	0.181072	0.285915	0.040577	0.56198	1.92236	2.9131	1
3	CONTROL-2	9.073	7.053	6.224	9.197	0.507	0.94	3.806	2.298	389.53	19.932	26.156	c		CONTROL-2	2.32922	1.81064	1.59782	2.36105	0.130157	0.241316	0.977075	0.589942	5.11694	6.71476	1
5	CONTROL-3	6.724	4.736	4.671	8.913	0.644	0.951	2.187	2.196	399.08	13.647	18.318	c		CONTROL-3	1.68488	1.18673	1.17044	2.23339	0.161371	0.238298	0.54801	0.550266	3.41962	4.59006	1
7	CONTROL-4	5.106	3.486	4.845	9.451	0.938	0.917	1.686	2.167	376.69	10.278	15.123	c		CONTROL-4	1.35549	0.925429	1.2862	2.50896	0.249011	0.243436	0.447583	0.575274	2.7285	4.01471	1
9	CONTROL-5	8.722	8.672	7.063	10.604	0.724	1.5	2.495	2.534	449.14	19.889	26.952	c		CONTROL-5	1.94193	1.9308	1.57256	2.36096	0.161197	0.333972	0.555506	0.564189	4.42824	6.0008	1
11	CONTROL-6	9.085	6.005	6.741	10.857	0.871	1.123	2.923	2.128	406.1	18.013	24.754	c		CONTROL-6	2.23713	1.4787	1.65994	2.67348	0.214479	0.276533	0.719773	0.524009	4.43561	6.09554	1
13	CONTROL-7	8.067	7.231	5.585	9.572	0.537	1.045	3.071	2.253	417.55	18.369	23.954	c		CONTROL-7	1.93198	1.73177	1.33756	2.29242	0.128607	0.250269	0.735481	0.539576	4.39923	5.7368	1
15	CONTROL-8	7.203	6.628	5.763	9.01	0.861	1.151	2.849	2.204	414.26	16.68	22.443	c		CONTROL-8	1.73876	1.59996	1.39116	2.17496	0.20784	0.277845	0.687732	0.532033	4.02646	5.41761	1
2	HFS-1	12.463	13.566	11.238	14.062	0.806	1.296	5.256	2.336	480.43	31.285	42.523	h		HFS-1	2.59413	2.82372	2.33915	2.92696	0.167766	0.269758	1.09402	0.486231	6.51187	8.85103	0
18	HFS-10	19.083	9.749	11.012	12.816	0.864	0.989	7.295	2.19	480.16	36.127	47.139	h		HFS-10	3.9743	2.03036	2.2934	2.66911	0.17994	0.205973	1.51929	0.456098	7.52395	9.81735	0
4	HFS-2	19	14.047	8.936	12.037	1.003	1.451	6.052	2.281	486.98	39.099	48.035	h		HFS-2	3.9016	2.88451	1.83498	2.47176	0.205963	0.297959	1.24276	0.468397	8.02887	9.86385	0
6	HFS-3	22.309	19.684	11.404	12.723	0.794	1.278	7.651	1.931	481.18	49.644	61.048	h		HFS-3	4.63631	4.09078	2.37001	2.64412	0.165011	0.265597	1.59005	0.401305	10.3171	12.6871	0
8	HFS-4	11.876	16.855	14.381	12.888	0.786	1.324	7.1	2.031	481.32	35.831	50.212	h		HFS-4	2.46738	3.50183	2.98783	2.67764	0.163301	0.275077	1.47511	0.421965	7.44432	10.4321	0
10	HFS-5											0
12	HFS-6	12.12	8.628	7.757	10.522	0.786	1.302	5.091	2.131	453.51	25.839	33.596	h		HFS-6	2.67249	1.90249	1.71044	2.32013	0.173315	0.287094	1.12258	0.46989	5.69756	7.408	0
14	HFS-7	13.442	15.042	9.935	8.332	0.674	1.06	4.453	2.087	423.65	32.937	42.872	h		HFS-7	3.1729	3.55057	2.3451	1.96672	0.159094	0.250207	1.0511	0.492624	7.77458	10.1197	0
16	HFS-8											0
17	HFS-9	19.59	15.385	12.989	11.841	0.746	1.368	6.178	2.393	498.15	41.153	54.142	h		HFS-9	3.93255	3.08843	2.60745	2.37699	0.149754	0.274616	1.24019	0.480377	8.26117	10.8686	0
19	HFS-9	13.967	16.101	11.868	10.747	0.774	1.419	5.302	2.56	481.43	35.37	47.238	h		HFS-11	2.90115	3.34441	2.46516	2.23231	0.160771	0.294747	1.1013	0.531749	7.34686	9.81202	0
	Promedio	G-EPI	G.RETRO	G. SUBCUT	HÍGADO	BAZO	RIÑÓN	G.MESENT	GASTRO	Peso	Grasa visceral				Promedio	G-EPI	G.RETRO	G. SUBCUT	HÍGADO	BAZO	RIÑÓN	G.MESENT	GASTRO	Grasa visceral	Grasa TOTAL
	CONTROL	7.31	5.91675	5.6395	9.71863	0.73175	1.10575	2.39875	2.272	409.837	15.6255				CONTROL	1.78436	1.43629	1.3758	2.37309	0.179217	0.268448	0.588967	0.554659	3.80962	5.18542
	HFS	15.9833	14.3397	11.0578	11.7742	0.803667	1.27633	6.042	2.21556	474.09	36.365				HFS	3.36142	3.02412	2.32817	2.47619	0.169435	0.269003	1.27071	0.467626	7.65626	9.98443
	CECT	14.7797	13.7231	10.0914	11.138	0.822889	1.26567	4.74833	2.29467	460.166	33.2511				CECT	3.18577	2.95886	2.17975	2.42318	0.178641	0.275563	0.976603	0.507627	7.17215	9.3519
	stdv	G-EPI	G.RETRO	G. SUBCUT	HÍGADO	BAZO	RIÑÓN	G.MESENT	GASTRO	Peso	Grasa visceral				stdv	G-EPI	G.RETRO	G. SUBCUT	HÍGADO	BAZO	RIÑÓN	G.MESENT	GASTRO	Grasa visceral	Grasa TOTAL
	CONTROL	1.77016	1.85765	1.01224	0.73465	0.15877	0.193221	1.09713	0.134811	22.4793	4.45245				CONTROL	0.426896	0.413332	0.229569	0.1578	0.0423401	0.032411	0.273202	0.0224004	1.05295	1.25803
	HFS	3.97559	3.42707	2.00755	1.69579	0.0902192	0.154898	1.11196	0.196303	22.2099	6.67474				HFS	0.768846	0.711959	0.380805	0.287761	0.0161596	0.0279176	0.20535	0.0385153	1.27	1.42741
	CECT	3.47935	3.40009	2.57693	0.831005	0.102372	0.0984492	1.17114	0.160688	26.7703	7.57725				CECT	0.60607	0.620148	0.488939	0.175443	0.0183132	0.0231218	0.164332	0.0243412	1.33726	1.73188
	n	G-EPI	G.RETRO	G. SUBCUT	HÍGADO	BAZO	RIÑÓN	G.MESENT	GASTRO	Peso	Grasa visceral				n	G-EPI	G.RETRO	G. SUBCUT	HÍGADO	BAZO	RIÑÓN	G.MESENT	GASTRO	Grasa visceral	Grasa TOTAL
	CONTROL	8	8	8	8	8	8	8	8	8	8				CONTROL	8	8	8	8	8	8	8	8	8	8
	HFS	9	9	9	9	9	9	9	9	9	9				HFS	9	9	9	9	9	9	9	9	9	9
	CECT	9	9	9	9	9	9	9	9	9	9				CECT	9	9	9	9	9	9	9	8	9	9
	SEM	G-EPI	G.RETRO	G. SUBCUT	HÍGADO	BAZO	RIÑÓN	G.MESENT	GASTRO	Peso	Grasa visceral				SEM	G-EPI	G.RETRO	G. SUBCUT	HÍGADO	BAZO	RIÑÓN	G.MESENT	GASTRO	Grasa visceral	Grasa TOTAL
	CONTROL	0.625844	0.65678	0.35788	0.259738	0.0561337	0.0683141	0.387895	0.0476629	7.94763	1.57418				CONTROL	0.15093	0.146135	0.081165	0.0557909	0.0149695	0.011459	0.0965917	0.00791972	0.372274	0.44478
	HFS	1.3252	1.14236	0.669183	0.565262	0.0300731	0.0516325	0.370652	0.0654345	7.40329	2.22491				HFS	0.256282	0.23732	0.126935	0.0959204	0.00538652	0.00930586	0.0684499	0.0128384	0.423335	0.475803
	CECT	1.15978	1.13336	0.858978	0.277002	0.0341241	0.0328164	0.39038	0.0535625	8.92343	2.52575				CECT	0.202023	0.206716	0.16298	0.0584809	0.00610439	0.00770727	0.0547773	0.00860593	0.445754	0.577292
					HÍGADO	BAZO	RIÑÓN			Peso						G-EPI	G.RETRO	G. SUBCUT				G.MESENT	GASTRO	Grasa visceral	Grasa TOTAL
				ANOVA	0.0142	0.5369	0.138			0.0001					ANOVA	0	0	0				0	0	0	0
			COMP. POSTERIORI	CNT vs HFS	0.001					0				COMP. POSTERIORI	CNT vs HFS	0	0	0				0	0	0	0
				CECT vs HFS	0.431					0.33					CECT	0.751	0.81	0.671				0.01	0.117	0.642	0.628
