# Supplementary material for: Pediococcus acidilactici (pA1c®) alleviates obesity-related dyslipidemia and inflammation in Wistar rats by activating beta-oxidation and modulating the gut microbiota
Source: Royal Society of Chemistry journal article supplement (doi:10.1039/d3fo01651j), 2023-01-01
Supplement: d3fo01651j3.xlsx [file d3fo01651j3.xlsx]

## Sheet: C09C11_Biofood_OTU_norm
OTU	Tax	HFS_1_MB19470	HFS_2_MB19471	HFS_3_MB19472	HFS_4_MB19473	HFS_5_MB19474	HFS_7_MB19475	HFS_8_MB19476	KEF_1_MB19477	KEF_6_MB19478	KEF_8_MB19479	KEF_11_MB19480	KpP_1_MB19481	KpP_5_MB19482	KpP_7_MB19483	KpP_8_MB19484	KpP_9_MB19485	KpP_10_MB19486	P_3_MB19487	P_4_MB19488	P_5_MB19489	P_7_MB19490	P_8_MB19491	P_9_MB19492	P_11_MB19493	LACT_3_MB19494	LACT_5_MB19495	LACT_6_MB19496	LACT_8_MB19497	HFS_9_MB20336	HFS_10_MB20337	CECT_2_MB20338	CECT_4_MB20339	CECT_5_MB20340	CECT_8_MB20341	CECT_9_MB20342	CECT_10_MB20343
OTU_1	OTU_1;Bacteria;Verrucomicrobia;Verrucomicrobiae;Verrucomicrobiales;Verrucomicrobiaceae;Akkermansia;muciniphila	13.6087	14.7028	14.5776	15.2008	16.9769	16.9227	16.9736	17.2103	15.1615	13.7953	16.7274	13.7726	16.0935	14.3868	14.5598	13.4704	16.3771	14.9797	14.0846	14.4732	15.5327	14.9405	14.2008	14.2643	16.4953	16.0055	17.1425	16.033	16.7049	13.7378	15.5121	12.6426	15.2686	16.04	14.2288	15.2887
OTU_2	OTU_2;Bacteria;Firmicutes;Clostridia;Clostridiales;Ruminococcaceae;?;?	12.7726	10.5305	14.5044	12.7997	13.4574	5.00958	13.4456	13.7201	12.5874	12.3654	14.1859	15.5446	11.3344	14.7242	12.891	13.8218	12.7357	13.6499	12.4738	13.7668	12.7702	13.6427	7.80791	14.6832	14.3695	15.2904	14.3309	12.965	12.9261	14.338	14.4811	14.0978	14.9264	14.4185	14.4696	13.8105
OTU_3	OTU_3;Bacteria;Firmicutes;Clostridia;Clostridiales;?;?;?	14.2966	13.9092	12.49	14.2566	9.64368	9.47707	10.1694	12.3251	11.9531	11.7585	12.1709	13.087	11.0327	13.2991	14.1023	13.7456	14.2727	13.8711	13.591	12.7235	11.8729	12.4929	12.3395	12.8402	13.9538	14.7222	12.1207	13.1612	11.5653	13.489	12.3628	12.6993	14.0352	13.5429	14.015	14.7357
OTU_4	OTU_4;Bacteria;Firmicutes;Clostridia;Clostridiales;Ruminococcaceae;Oscillospira;?	15.405	14.4708	13.6684	12.4197	9.12521	7.81048	9.84352	8.93734	12.587	14.8786	10.8462	12.4963	12.5202	14.0853	14.8264	13.395	11.1608	13.1227	14.933	13.0779	12.2696	13.0113	14.2233	12.0606	10.1151	7.33176	8.75121	12.9281	12.9424	14.4688	12.6246	14.254	12.9046	12.0687	12.8492	13.276
OTU_5	OTU_5;Bacteria;Bacteroidetes;Bacteroidia;Bacteroidales;Porphyromonadaceae;Parabacteroides;?	11.7363	14.3243	13.4744	12.9459	14.6259	11.3313	13.2796	10.9324	14.7623	13.7318	14.9936	13.1265	15.0308	12.6034	10.1939	12.9706	12.9312	13.6383	11.7608	13.6717	12.223	13.5754	13.5594	12.2655	13.1864	12.0683	12.9276	14.1506	12.5283	12.9219	13.0567	12.2782	12.6211	12.0085	12.8484	13.2366
OTU_6	OTU_6;Bacteria;Firmicutes;Clostridia;Clostridiales;Lachnospiraceae;[Ruminococcus];torques	13.1131	12.9306	12.4463	9.0748	10.5976	9.13657	8.76671	10.9557	14.253	13.6695	11.0125	12.7972	10.6627	12.4299	12.6085	13.3656	12.5868	12.592	13.0027	14.0197	14.0079	13.8249	10.7305	14.4247	10.1007	9.29317	11.6317	12.737	12.176	14.034	12.7878	12.3616	14.122	13.2795	12.7813	13.2726
OTU_7	OTU_7;Bacteria;Firmicutes;Clostridia;Clostridiales;Ruminococcaceae;?;?	12.4282	11.2537	14.9264	12.8774	11.1832	3.9984	12.9263	11.5442	11.398	12.608	11.7001	10.9594	12.087	12.3588	8.54515	13.2916	11.2238	13.2914	5.11037	12.9419	10.6232	12.862	13.8448	12.5385	11.7337	9.4907	10.4344	11.2342	13.4023	14.0368	13.1966	12.8257	12.0448	10.3648	3.88724	12.6364
OTU_8	OTU_8;Bacteria;Firmicutes;Clostridia;Clostridiales;Peptostreptococcaceae;?;?	11.7666	12.3969	12.7882	12.7993	13.7015	15.46	8.91706	12.9092	13.6265	12.8531	12.2793	9.93948	13.2908	9.67697	12.6935	9.01415	12.601	10.4572	10.065	9.05476	13.9126	11.5276	11.5233	13.5406	13.0399	13.0459	11.599	8.9041	9.73691	10.2282	12.2246	11.9871	10.9498	11.5366	13.2998	12.8721
OTU_9	OTU_9;Bacteria;Firmicutes;Clostridia;Clostridiales;Lachnospiraceae;?;?	14.3702	13.9266	7.84764	10.7888	3.5931	4.20784	5.10804	3.05663	8.72832	10.2793	12.2473	10.2438	3.12189	13.4923	13.5934	12.2986	12.8169	13.3308	11.293	10.6091	11.4789	4.06162	5.07792	12.0404	13.2727	8.50468	8.62681	5.67552	3.26964	12.6542	12.7029	14.5251	12.9912	13.1752	13.3308	3.35929
OTU_10	OTU_10;Bacteria;Firmicutes;Clostridia;Clostridiales;Lachnospiraceae;Blautia;producta	11.5976	12.4898	11.9795	9.99226	11.8942	8.05358	9.80803	10.5756	13.4329	13.2369	9.29389	14.143	12.5254	11.6738	11.3402	12.7274	11.0181	10.6803	13.4198	12.0878	11.4983	13.4569	13.9877	13.8498	8.02319	7.50864	8.40586	10.2413	10.9716	13.2173	10.1738	10.6974	10.7675	12.0928	12.1569	12.1091
OTU_11	OTU_11;Bacteria;Proteobacteria;Gammaproteobacteria;Enterobacteriales;Enterobacteriaceae;?;?	8.95465	10.9687	12.5207	8.78334	6.3307	12.3293	11.5255	8.48572	12.9857	14.3597	10.5102	10.7384	13.2964	11.247	8.66514	12.6738	10.4285	12.5231	11.9327	9.43669	15.5509	11.6783	14.6535	11.7873	9.98553	10.9616	10.3939	12.4022	8.85898	9.33404	6.56445	7.71495	9.18479	11.7021	10.5343	11.2059
OTU_12	OTU_12;Bacteria;Firmicutes;Clostridia;Clostridiales;Lachnospiraceae;?;?	12.973	11.6473	12.2874	12.0914	10.8138	9.85317	10.0145	12.3296	12.5514	12.8727	9.74664	11.5394	9.77404	11.9355	12.2748	12.6747	10.1971	12.2667	12.8244	11.9619	11.0191	13.3373	12.5819	12.8592	10.315	9.33177	9.31968	11.6328	10.8235	12.5381	10.9212	10.9794	13.7061	11.1509	12.1244	13.2019
OTU_13	OTU_13;Bacteria;Firmicutes;Bacilli;Lactobacillales;Lactobacillaceae;Lactobacillus;?	10.2927	8.42756	9.87722	14.0427	10.3081	9.51449	13.0129	5.52799	10.659	12.5159	9.40407	14.5084	12.9931	15.0539	8.98058	13.5005	11.5542	13.1927	11.622	12.5057	11.038	10.5567	13.336	11.5239	9.83166	14.1252	7.07866	12.3398	12.3567	10.2101	7.41114	8.44917	7.95819	9.37715	2.75463	8.25713
OTU_14	OTU_14;Bacteria;Firmicutes;Clostridia;Clostridiales;?;?;?	12.5503	12.6404	12.5147	14.7652	6.59375	9.3531	12.2238	6.58741	12.4123	7.26001	7.70243	8.70193	6.4856	11.5351	12.8269	11.764	10.8861	9.02751	13.5492	11.506	9.79818	6.94124	10.2552	8.31821	12.4218	7.85883	9.5105	11.9795	11.051	11.2046	13.5399	9.21904	10.9151	9.33789	12.3809	8.94015
OTU_15	OTU_15;Bacteria;Bacteroidetes;Bacteroidia;Bacteroidales;S24-7;?;?	11.859	11.3804	12.5282	10.6976	12.7585	10.0255	11.5019	8.83313	13.1258	11.4541	2.89288	3.278	12.5845	12.6336	11.2886	1.58133	11.1524	12.4346	12.0214	12.5057	9.65289	13.2809	12.1598	10.4781	12.3686	2.32261	8.87416	13.1777	13.2201	1.16685	11.8939	0.871666	12.9696	0.754146	4.77844	11.8926
OTU_16	OTU_16;Bacteria;Firmicutes;Clostridia;Clostridiales;Ruminococcaceae;Ruminococcus;flavefaciens	11.0202	9.95378	12.0966	11.1271	6.00874	9.66408	3.94038	2.82786	7.89379	7.80658	9.32314	11.8755	4.99191	12.1776	12.9959	11.0546	12.2075	10.6115	11.8603	12.0499	9.8875	4.84311	3.39445	12.6017	10.5873	8.02875	8.02862	12.8038	2.48804	12.2465	11.5764	10.8499	11.6974	10.855	14.7138	6.48138
OTU_17	OTU_17;Bacteria;Deferribacteres;Deferribacteres;Deferribacterales;Deferribacteraceae;Mucispirillum;schaedleri	11.4667	10.7608	8.74805	11.4886	7.52453	4.20784	6.59517	7.47497	11.6644	3.41825	6.60604	7.5382	9.39919	11.8942	8.55295	8.56821	4.32817	15.1101	11.8327	15.4467	11.879	5.53131	12.5388	6.53654	9.60445	9.26295	4.12344	10.2936	6.50618	10.9007	4.78025	9.74789	9.6262	7.40864	7.95869	9.60951
OTU_18	OTU_18;Bacteria;Firmicutes;Clostridia;Clostridiales;Ruminococcaceae;Oscillospira;?	10.1345	10.8808	12.1467	9.35308	7.63819	7.64036	8.11313	9.41317	11.7024	11.6137	8.60087	11.3139	0	9.81261	8.35306	13.1593	6.59146	10.5518	1.05802	10.9299	10.0741	11.7104	0	12.2583	0	1.58553	1.24434	5.33182	5.12928	13.4187	2.08036	12.4464	7.07756	11.3134	11.8155	12.9033
OTU_19	OTU_19;Bacteria;Firmicutes;Clostridia;Clostridiales;Peptococcaceae;rc4-4;?	8.91626	10.056	9.08236	9.02519	9.38391	6.60194	8.8563	12.0534	11.8309	9.57177	9.08779	8.7682	10.3307	6.38921	7.66868	10.7553	8.7907	8.4964	8.07914	7.71875	5.67351	11.7053	11.1737	9.69934	8.24406	9.71853	5.99952	7.03358	11.2685	8.77706	13.3658	9.40181	8.44572	11.5912	10.2476	13.7759
OTU_20	OTU_20;Bacteria;Firmicutes;Clostridia;Clostridiales;Ruminococcaceae;Oscillospira;?	12.7983	13.0427	10.7065	11.6059	3.00777	3.88105	4.59234	4.27058	9.91967	10.9108	8.42318	7.5382	9.27461	9.86612	13.2074	9.64022	9.63828	10.0343	13.2301	8.96665	8.48876	10.3436	9.21465	10.4597	8.65135	2.58567	6.77029	11.2064	9.3906	9.1846	11.7203	11.8989	10.2207	10.9091	11.5257	7.80282
OTU_21	OTU_21;Bacteria;Firmicutes;Clostridia;Clostridiales;Lachnospiraceae;Coprococcus;?	11.1016	11.5343	7.88441	9.02816	10.433	4.55296	0.845868	3.42765	10.266	10.8209	3.61449	11.8937	8.69081	11.1261	11.7151	10.8377	7.13271	10.0137	12.9405	8.57567	8.9763	11.4887	10.8023	10.7097	6.31744	6.24877	6.03007	8.82445	11.9115	11.6297	9.3854	10.2208	9.75319	9.60667	10.7233	12.5073
OTU_22	OTU_22;Bacteria;Firmicutes;Clostridia;Clostridiales;Ruminococcaceae;?;?	6.72871	2.3223	6.14267	5.05164	0	0	0	0	0	1.25359	8.0647	0	1.54909	1.6432	11.9982	0	0.966677	2.57544	0	0	10.8093	0	1.04074	0	1.50153	12.1081	9.63744	3.99072	1.10604	1.16685	0.718811	14.0067	2.81959	13.7225	12.551	0
OTU_23	OTU_23;Bacteria;Tenericutes;Mollicutes;Anaeroplasmatales;Anaeroplasmataceae;Anaeroplasma;?	8.8516	12.355	3.11183	12.7137	1.00445	5.56057	9.58355	8.58072	8.47673	6.8041	11.0954	11.9925	2.76106	8.43938	13.3234	10.7963	8.93552	6.73014	1.05802	8.05747	11.2985	12.5149	9.34702	9.93679	12.1567	9.78712	2.6952	13.1053	3.26964	9.34236	11.7734	1.41118	8.94867	10.2037	10.2686	2.58194
OTU_24	OTU_24;Bacteria;Firmicutes;Clostridia;Clostridiales;Clostridiaceae;?;?	11.3965	10.4543	10.1212	10.0663	8.091	12.7237	2.7184	6.6056	10.059	11.1245	9.96183	4.63954	11.2167	7.64829	9.94696	4.08234	5.45763	5.11818	7.65236	4.26141	12.3922	6.90835	3.6588	10.3323	10.121	10.7185	7.28271	3.3896	0.656514	6.79702	11.8836	11.9903	9.88962	11.7119	11.8642	11.3261
OTU_25	OTU_25;Bacteria;Firmicutes;Clostridia;Clostridiales;Lachnospiraceae;Coprococcus;?	8.90894	11.6226	9.61032	9.4863	1.00445	2.24658	0.845868	1.15059	9.11772	2.98582	10.2246	2.9117	1.54909	9.98576	7.33049	3.90181	1.54036	11.0938	2.6804	10.7839	10.0967	3.35533	4.24594	11.7014	7.11226	2.58567	3.40378	0	5.32863	10.911	12.5292	12.0303	13.4499	2.53765	11.6635	3.14362
OTU_26	OTU_26;Bacteria;Firmicutes;Clostridia;Clostridiales;Ruminococcaceae;Oscillospira;?	11.6497	9.66046	10.9182	9.42235	6.25669	3.45788	3.28848	6.11525	8.54526	13.2357	8.55229	8.9054	9.80233	11.3409	11.8962	10.8886	9.98656	11.6351	12.4087	11.358	10.2821	10.9572	1.63903	8.6369	6.66858	4.8588	4.75558	8.9041	8.40874	10.8983	9.74594	12.2869	8.82882	10.1619	9.65742	4.91706
OTU_27	OTU_27;Bacteria;Firmicutes;Clostridia;Clostridiales;?;?;?	10.8626	12.0028	10.939	10.3871	1.59089	11.5962	0.845868	5.03215	8.96351	11.4962	8.25125	10.8817	2.76106	10.1565	7.88183	11.2022	8.08763	9.17594	11.4904	8.85024	9.90472	5.64216	2.65224	1.8427	5.51948	10.1506	10.8813	6.60224	3.64678	11.4752	9.90891	11.7024	11.1303	9.31007	12.0127	10.4189
OTU_28	OTU_28;Bacteria;Firmicutes;Clostridia;Clostridiales;Ruminococcaceae;Oscillospira;?	9.35527	11.627	13.1317	8.12811	9.08568	3.75331	3.28848	8.61704	10.3799	10.593	10.2572	9.75206	10.9841	11.2343	11.4838	10.6047	7.79705	9.96443	9.92905	13.3306	10.6377	8.62343	5.40033	9.10172	10.0641	6.22966	7.19106	10.3885	3.83332	11.3763	7.84717	9.18859	10.879	7.20215	9.56955	4.33894
OTU_29	OTU_29;Bacteria;Firmicutes;Clostridia;Clostridiales;?;?;?	11.2832	11.1154	11.0781	13.1621	3.17782	8.01232	10.7199	2.55586	10.9561	0	5.95562	4.36284	2.76106	10.3379	11.2698	10.4774	9.4023	7.20782	12.2881	10.1535	8.43763	2.48983	8.52308	6.92228	10.9829	6.47658	7.70808	10.4898	9.28661	9.73382	12.0367	0	9.58979	7.8983	10.8903	6.41065
OTU_30	OTU_30;Bacteria;Bacteroidetes;Bacteroidia;Bacteroidales;Bacteroidaceae;Bacteroides;acidifaciens	8.16418	11.1564	11.8965	1.65279	3.32992	7.22472	10.4192	9.90865	11.7726	11.6308	0	9.22673	13.2435	8.54978	11.1217	11.201	10.1578	7.78304	7.45296	8.67312	13.1493	9.90754	9.53558	4.35057	9.42197	10.4459	5.44103	10.3441	1.95656	9.0806	0.718811	2.11073	1.71033	11.8989	1.95397	1.27797
OTU_31	OTU_31;Bacteria;Firmicutes;Bacilli;Lactobacillales;Lactobacillaceae;Lactobacillus;?	11.9748	7.5627	7.46622	11.0119	7.74355	12.4099	10.4598	6.83875	11.4651	6.39336	10.5197	8.34464	11.192	7.32434	10.6204	11.6207	11.4493	8.53935	4.63259	10.4482	10.3095	7.28665	10.5055	10.5791	10.5882	11.9612	8.12375	3.99072	7.89389	11.157	11.1884	8.97921	6.09621	7.46579	7.61386	7.53555
OTU_32	OTU_32;Bacteria;Firmicutes;Clostridia;Clostridiales;Lachnospiraceae;?;?	6.88599	12.9508	9.62591	10.6377	0	1.16898	1.76215	3.25403	7.08002	1.91407	7.39331	0	0	7.05161	6.2073	8.95746	14.4401	4.74388	6.71257	7.75157	5.70531	9.35893	2.06069	1.8427	10.8744	5.04522	8.88674	1.23531	1.10604	9.34789	8.89581	3.91707	8.87144	5.3991	5.75192	3.14362
OTU_33	OTU_33;Bacteria;Firmicutes;Bacilli;Lactobacillales;Streptococcaceae;Lactococcus;?	10.5393	9.19669	9.84959	8.58412	8.55575	7.90369	6.84575	6.92818	10.9103	11.1789	8.02964	11.6322	10.1443	10.7738	9.41216	11.8506	9.63309	11.3927	11.8125	11.2778	11.2189	11.5384	11.9168	10.7632	7.57405	6.46027	5.39483	12.7639	6.54231	8.63968	5.11199	9.09318	6.0639	7.1473	8.38556	7.60583
OTU_34	OTU_34;Bacteria;Firmicutes;Clostridia;Clostridiales;?;?;?	10.4122	9.19669	6.94622	11.1992	2.00667	0	1.76215	8.89729	9.25363	12.925	4.55436	7.23914	11.5057	9.6119	11.0226	9.26369	11.2261	10.5432	7.8137	8.23625	7.21763	9.38108	1.63903	9.12864	11.7023	8.71853	7.68906	6.97266	0.656514	9.34513	11.5299	11.9882	8.91963	11.1017	8.11344	9.07777
OTU_35	OTU_35;Bacteria;Firmicutes;Clostridia;Clostridiales;Ruminococcaceae;Oscillospira;?	8.55002	5.54271	6.79992	10.3532	3.8156	7.79434	9.3931	1.78244	6.27681	9.02273	10.465	11.6587	8.8678	8.19993	9.79742	10.0016	9.99197	7.87126	4.69419	6.82916	6.29153	11.9291	11.9838	11.0938	10.5348	6.13012	7.66006	11.4139	12.0579	11.7418	6.88923	10.8453	10.4745	7.47696	7.57958	6.66479
OTU_36	OTU_36;Bacteria;Firmicutes;Clostridia;Clostridiales;?;?;?	8.24386	7.09849	12.0346	6.63869	4.59347	4.20784	4.59234	5.86646	5.37276	10.6211	9.04015	11.4469	9.55139	8.65992	4.77196	11.8692	10.7671	9.42321	8.00207	5.66356	9.32733	13.1794	6.00982	6.36605	5.85236	9.45	5.24663	8.3844	10.2511	9.84738	7.83089	9.99782	8.47366	12.06	9.25083	6.99801
OTU_37	OTU_37;Bacteria;Firmicutes;Clostridia;Clostridiales;Ruminococcaceae;Oscillospira;?	10.0101	10.0209	9.58501	10.482	8.57871	7.76152	7.50144	6.85404	10.7196	9.70456	9.40749	9.73375	8.71084	8.29078	10.6715	12.2428	9.91277	7.76998	9.42877	9.48872	8.93332	10.937	9.23251	10.8056	9.29943	8.09888	9.42112	10.0518	9.89807	10.7766	9.17584	9.87953	9.69768	9.84073	9.76714	11.5768
OTU_38	OTU_38;Bacteria;Actinobacteria;Actinobacteria;Actinomycetales;Micrococcaceae;Rothia;aeria	8.41196	9.63164	11.0558	8.96456	9.30807	8.78702	8.22115	8.71244	9.94525	10.7109	7.26354	7.65178	8.33403	7.8072	8.61387	12.1535	7.6194	11.215	8.06755	11.3941	10.2339	9.82476	12.9077	9.42312	6.26687	7.45206	6.05998	5.06624	9.64437	11.3448	6.36412	7.24021	7.97566	8.3897	7.91124	8.92754
OTU_39	OTU_39;Bacteria;Firmicutes;Clostridia;Clostridiales;Ruminococcaceae;Ruminococcus;?	9.09017	8.73449	10.2077	8.41769	4.91548	7.22472	4.54385	6.64131	8.10527	9.52102	6.25783	11.0316	7.89443	9.27864	10.5442	11.2689	7.17143	8.85896	12.3785	9.22512	10.1797	10.8802	10.2565	9.94817	4.12787	4.0008	6.05998	11.4852	8.1199	11.7504	9.58541	9.83172	10.7403	7.42025	8.77638	8.99759
OTU_40	OTU_40;Bacteria;Bacteroidetes;Bacteroidia;Bacteroidales;S24-7;?;?	7.77113	7.54426	7.11484	6.88105	10.4278	8.85083	7.36156	8.87122	8.98422	5.03738	9.70558	6.96551	9.74519	6.85391	5.63207	7.25198	9.92557	7.25543	7.79274	8.73187	5.30983	7.90233	7.50617	5.00188	10.6812	13.1967	10.4613	5.00671	10.8368	4.54928	11.0708	7.45329	9.67914	9.95092	8.62915	11.2458
OTU_41	OTU_41;Bacteria;Firmicutes;Clostridia;Clostridiales;Ruminococcaceae;Oscillospira;?	12.1574	9.37593	4.16899	7.99499	2.00667	1.80614	2.7184	2.22037	4.67523	7.23371	1.38232	3.278	4.70277	9.87267	7.43547	11.2083	9.41042	10.7559	2.08617	5.07558	5.18008	4.93308	0	4.74782	6.98246	4.08826	4.33396	6.21204	2.98463	3.87747	9.79081	12.923	5.7351	9.98358	10.0221	2.18981
OTU_42	OTU_42;Bacteria;Firmicutes;Clostridia;Clostridiales;?;?;?	9.10731	7.21186	9.18699	7.66992	9.73338	10.2915	9.6147	11.137	5.84096	8.83431	8.46314	9.01863	4.19667	10.0275	7.00627	11.8668	8.28592	8.01098	6.43435	6.87457	6.95212	8.85684	10.8625	8.97024	7.43592	10.8495	7.67946	7.91927	10.7622	10.2342	6.28269	8.53881	6.75223	10.5179	8.53614	9.88859
OTU_43	OTU_43;Bacteria;Bacteroidetes;Bacteroidia;Bacteroidales;Rikenellaceae;?;?	5.23451	6.97545	7.96999	6.09906	10.5985	7.56626	9.37935	7.63406	6.38047	8.82554	11.027	6.30926	9.13329	6.62475	6.81198	7.25198	9.79837	7.34619	9.27851	6.94721	7.44178	11.0994	10.716	6.81035	8.21768	9.38023	9.48039	9.45921	8.90826	9.08226	10.4911	7.8299	10.8755	9.00346	10.7663	8.83603
OTU_44	OTU_44;Bacteria;Firmicutes;Clostridia;Clostridiales;Ruminococcaceae;Ruminococcus;?	11.0083	10.7347	8.91475	8.39489	6.77698	2.85651	2.06674	5.56565	7.26748	9.9464	6.48185	9.436	7.02307	9.26874	9.64523	8.21857	6.68809	9.55654	11.1478	6.75016	6.06522	10.7037	5.63329	7.37986	5.33542	5.28623	5.65214	10.0277	7.5787	9.58154	10.5432	10.6844	9.43263	10.7775	9.04955	7.00603
OTU_45	OTU_45;Bacteria;Bacteroidetes;Bacteroidia;Bacteroidales;Bacteroidaceae;Bacteroides;uniformis	8.27832	8.65939	5.49729	9.25269	8.92773	8.11335	7.94125	8.3358	8.9801	10.1761	9.00899	12.0469	11.7988	6.46052	7.84419	7.30747	6.99917	7.54322	6.24151	8.56185	7.21763	10.3083	8.06874	6.47495	7.19573	7.03427	6.67686	10.1042	10.0168	9.24802	9.72957	7.93147	9.82482	11.0831	8.83385	10.4749
OTU_46	OTU_46;Bacteria;Firmicutes;Clostridia;Clostridiales;Ruminococcaceae;Oscillospira;?	10.4639	9.93857	9.11809	9.57618	2.59237	4.10692	4.77149	5.80483	9.22258	9.90742	7.10418	8.25504	8.78202	9.40603	11.1282	8.42502	7.44074	9.35927	11.1533	8.20103	8.59016	10.4262	8.48527	8.24014	5.89738	2.00064	2.6952	8.34889	9.43812	9.77951	9.90211	10.0541	9.37454	9.71671	8.86086	9.04895
OTU_47	OTU_47;Bacteria;Firmicutes;Clostridia;Clostridiales;Ruminococcaceae;Oscillospira;?	10.1387	10.2189	9.10257	8.98302	4.00833	3.61314	4.89261	5.89632	10.2778	9.72358	6.76369	8.63247	7.59717	8.75517	9.9261	10.0754	9.41849	8.84658	10.2596	8.52436	8.73582	10.04	10.7799	9.85654	6.65554	2.32261	6.42433	6.90905	10.0343	9.57566	9.34728	9.82382	7.88149	8.82274	8.85371	8.94433
OTU_48	OTU_48;Bacteria;Firmicutes;Clostridia;Clostridiales;Ruminococcaceae;?;?	7.06337	9.05412	8.96955	8.26011	5.29406	6.94668	7.26763	6.2134	11.9039	7.24692	7.63406	6.26914	8.93747	6.15133	8.20254	10.2246	8.54377	6.7166	8.35183	7.89068	7.65216	10.1055	9.43118	6.90681	7.37355	6.50864	7.56937	7.6248	9.97113	9.35476	9.135	10.1583	9.81029	8.96036	9.04484	11.3656
OTU_49	OTU_49;Bacteria;Firmicutes;Clostridia;Clostridiales;?;?;?	1.39441	0	4.47479	0	5.62341	0	13.8294	9.10013	0	3.21818	1.38232	0	10.5707	0	1.5968	9.02523	0	0	0	1.14528	1.09575	0	2.38657	1.8427	0	0	0	0	8.04003	0	0	0.871666	0	0	0	0
OTU_50	OTU_50;Bacteria;Firmicutes;Clostridia;Clostridiales;Ruminococcaceae;Oscillospira;?	7.81874	8.84908	7.22543	9.43134	6.81616	8.13273	8.70189	7.3073	8.82796	8.51208	8.58285	7.75707	7.85896	9.47654	8.78917	10.1481	8.64354	7.55087	9.8585	7.52353	9.18519	11.414	10.5336	8.33565	9.24168	7.90774	9.50235	9.56101	8.45212	8.97568	9.906	8.456	9.72635	7.79504	8.64166	9.49736
OTU_51	OTU_51;Bacteria;Firmicutes;Erysipelotrichi;Erysipelotrichales;Erysipelotrichaceae;?;?	0	4.01836	1.82711	1.05117	8.67419	9.17759	7.06778	4.86101	8.65786	2.36543	2.54118	0	7.69429	0	0	2.80269	1.54036	0.994296	12.802	10.0083	8.31934	5.66859	11.3657	13.1052	0	0	2.35257	0	9.08858	1.8034	0	0	0	0	0	6.48138
OTU_52	OTU_52;Bacteria;Bacteroidetes;Bacteroidia;Bacteroidales;Bacteroidaceae;Bacteroides;?	8.48919	10.2935	9.872	0	0	11.8225	9.12089	11.3576	10.3641	1.25359	0	0	0	10.765	7.11562	10.3108	4.63566	10.2306	3.56324	9.18663	8.70076	0.943674	11.139	10.4084	9.67402	9.30463	4.60139	7.67347	8.07745	2.0402	3.41784	3.08202	4.07951	3.31124	7.50392	2.58194
OTU_53	OTU_53;Bacteria;Bacteroidetes;Bacteroidia;Bacteroidales;S24-7;?;?	0	0	0	6.49174	7.75031	3.28387	0	0	0	9.06809	0	0	8.94877	0	9.74732	0	0	0	1.05802	0	0	10.0762	0	6.14657	8.16802	0	5.80127	8.7078	1.10604	8.91928	1.19639	0	0.813487	11.6887	12.3703	7.35896
OTU_54	OTU_54;Bacteria;Firmicutes;Clostridia;Clostridiales;Lachnospiraceae;Coprococcus;?	7.88982	8.04595	7.43114	5.79915	3.32992	2.24658	3.03142	4.07558	8.75268	8.61245	4.34217	10.3365	6.05517	9.46358	5.90007	10.362	7.12286	7.07612	9.43555	8.71948	5.641	9.19586	8.97198	9.05688	3.58359	1.00043	3.73573	8.69372	9.87347	10.8299	9.04966	9.40711	8.70859	10.1046	9.18538	10.0755
OTU_55	OTU_55;Bacteria;Firmicutes;Clostridia;Clostridiales;Ruminococcaceae;?;?	5.63993	8.32689	8.9122	7.43983	7.63089	5.31122	0	5.48933	11.8084	10.2353	6.19593	7.81396	9.87812	7.00466	6.96009	9.33218	5.60634	8.01652	7.61303	8.96665	6.18281	9.6216	1.04074	9.31888	4.46346	6.85883	8.95996	3.18997	8.14948	9.97603	7.45428	8.50296	6.56871	6.76555	8.42229	11.6465
OTU_56	OTU_56;Bacteria;Firmicutes;Erysipelotrichi;Erysipelotrichales;Erysipelotrichaceae;?;?	6.60139	0	0.887072	2.07608	6.03111	0	4.21269	0	7.84931	8.05208	6.06355	12.2081	6.68783	9.3508	7.88183	11.5837	8.39629	6.89556	10.6343	9.4765	7.79197	10.5263	11.2602	11.8544	2.4799	4.80818	1.24434	8.87527	5.50375	8.20697	0	0.871666	8.15505	8.2951	5.9257	7.16489
OTU_57	OTU_57;Bacteria;Firmicutes;Clostridia;Clostridiales;Lachnospiraceae;?;?	8.21647	8.36591	4.77252	11.0021	2.00667	2.58354	0.845868	0	4.75455	7.32373	0	3.278	10.369	6.85391	11.9591	7.78248	9.43649	9.97015	9.15524	5.31399	7.70028	8.37323	9.85176	5.53198	8.61475	3.32269	6.69603	10.0277	10.1574	4.34346	9.3965	9.98133	9.75065	4.12757	5.1259	2.58194
OTU_58	OTU_58;Bacteria;Firmicutes;Clostridia;Clostridiales;Lachnospiraceae;?;?	7.3202	11.4661	0.887072	2.07608	0	1.16898	0	4.27058	0	7.99059	7.40703	0	1.54909	8.82439	0	2.31757	0	5.63266	0	0	0	0	0	0	3.46896	6.74231	11.7309	4.2177	1.95656	2.42175	7.20557	12.514	1.71033	4.72276	10.099	1.27797
OTU_59	OTU_59;Bacteria;Bacteroidetes;Bacteroidia;Bacteroidales;[Odoribacteraceae];Odoribacter;?	9.17188	9.3514	9.24469	9.79917	1.00445	11.3327	10.3147	0	0	2.70872	1.38232	6.18539	9.84526	1.6432	2.82256	1.58133	0	1.99144	1.05802	0	0	1.91466	8.82837	8.28868	0	11.8038	10.6328	9.70374	10.0152	8.72069	0	0.871666	0	0	0	0.776097
OTU_60	OTU_60;Bacteria;Firmicutes;Clostridia;Clostridiales;Ruminococcaceae;Oscillospira;?	7.77113	9.14665	7.16694	10.394	6.69529	7.58514	8.15812	7.38306	8.19331	7.75204	8.04728	8.52583	8.26343	6.74387	8.23198	11.2537	8.82753	7.1282	9.00534	6.33958	8.49332	10.6417	9.96598	7.27533	8.85908	7.25823	8.79188	9.09484	7.70361	8.96313	9.94999	7.86627	6.46119	7.48251	7.7317	8.86498
OTU_61	OTU_61;Bacteria;Firmicutes;Clostridia;Clostridiales;Ruminococcaceae;?;?	0	0	10.191	10.2388	1.59089	1.16898	1.37556	1.15059	8.12779	0	9.1826	11.3164	0	0	0	0	0	0	0	10.0779	9.16247	10.9713	0	11.939	0.937883	0	0	0	0	0	1.19639	0	10.8064	0	0	9.57623
OTU_62	OTU_62;Bacteria;Firmicutes;Clostridia;Clostridiales;?;?;?	4.84246	7.05574	11.4827	5.95688	1.00445	0	0	1.78244	0	8.97193	5.41882	4.36284	3.85641	6.1938	0	0	9.38181	2.99	5.46867	1.14528	0	0	2.06069	9.50245	0	7.61556	0	1.89089	5.03099	3.53409	7.74664	9.46754	10.7415	9.74354	11.0162	0
OTU_63	OTU_63;Bacteria;Firmicutes;Clostridia;Clostridiales;Ruminococcaceae;Ruminococcus;bromii	2.55739	4.59738	7.50046	6.50883	4.70898	1.16898	2.06674	5.74044	5.09652	3.59393	8.97254	10.9578	4.4718	9.05499	6.35735	11.2383	2.52899	0	9.79314	5.47988	3.75591	6.36214	6.72344	11.1564	1.90579	6.75573	0	1.23531	2.15627	9.22418	0.718811	10.9777	4.52144	6.64205	6.62541	11.4036
OTU_64	OTU_64;Bacteria;Firmicutes;Clostridia;Clostridiales;?;?;?	7.73849	5.96855	7.20065	7.53464	3.17782	7.6313	4.49367	5.83597	3.64993	9.33563	7.79928	10.191	4.70277	7.99903	5.74531	11.068	8.28151	5.4151	8.793	5.91606	7.41319	11.0361	5.72265	7.87717	6.7689	4.8588	7.01899	9.06961	7.52555	8.31809	9.37421	9.15749	9.45615	9.33636	9.5597	7.24838
OTU_65	OTU_65;Bacteria;Firmicutes;Clostridia;Clostridiales;Lachnospiraceae;Dorea;?	8.94515	8.63636	7.83696	4.34338	5.43494	4.20784	3.69601	5.77299	8.32907	10.4758	5.95562	8.03344	5.72821	7.98701	7.29373	8.83062	5.10441	6.01111	8.09064	7.78367	7.48821	9.79208	5.43601	10.4221	5.51948	5.17075	6.65742	7.73895	6.37209	8.67746	9.46665	8.6383	10.3469	9.40518	9.79728	7.06095
OTU_66	OTU_66;Bacteria;Proteobacteria;Deltaproteobacteria;Desulfovibrionales;Desulfovibrionaceae;Bilophila;?	10.8229	1.3788	6.19378	8.50968	0	1.16898	0	2.22037	9.80091	1.91407	0	0	1.54909	9.07785	11.8846	8.68456	6.9331	9.97015	10.6353	10.6412	9.35014	1.91466	10.1651	8.60849	7.77439	3.32269	5.13864	5.23138	6.03435	5.92528	1.84129	9.64548	2.96663	1.61348	3.57564	3.86169
OTU_67	OTU_67;Bacteria;Firmicutes;Clostridia;Clostridiales;Lachnospiraceae;?;?	7.2754	8.70989	7.89988	7.11105	4.81592	0	0	3.42765	7.15503	7.76127	3.79234	8.21336	6.01276	8.11408	5.6898	8.13923	5.66179	4.2371	8.58922	7.52353	4.17461	7.90233	8.61543	8.70107	4.2716	6.34069	5.13864	7.72054	8.87323	10.1282	7.71594	9.53041	9.12538	8.8722	9.64918	10.1075
OTU_68	OTU_68;Bacteria;Bacteroidetes;Bacteroidia;Bacteroidales;S24-7;?;?	5.85818	8.97143	7.43823	7.54296	0	0	9.71392	0	9.16204	2.36543	0	7.25976	10.0969	8.27108	7.31223	7.65992	8.34216	8.15853	3.27151	8.43625	6.13692	0	6.93767	4.88043	8.27424	10.6338	9.01445	6.33815	6.58623	4.5104	4.15311	10.3216	4.78193	4.23668	10.5653	4.52902
OTU_69	OTU_69;Bacteria;Bacteroidetes;Bacteroidia;Bacteroidales;S24-7;?;?	6.32187	8.56804	2.96261	5.98157	7.87303	7.16321	4.72874	8.06711	8.13521	8.16772	6.37418	6.86141	8.25436	4.47481	4.10415	3.45448	6.21885	5.27427	6.08933	5.51853	4.49873	5.20998	5.2877	3.66	6.02459	9.45206	7.17748	4.41378	7.79628	6.53173	11.1602	9.4159	8.38818	7.36123	9.68992	9.34131
OTU_70	OTU_70;Bacteria;Bacteroidetes;Bacteroidia;Bacteroidales;S24-7;?;?	5.89814	6.38243	7.31281	5.82666	9.47035	6.94668	9.26808	5.36672	7.43335	7.46607	9.52857	7.08589	10.6068	7.11928	8.24166	7.51028	6.98837	6.11802	0	7.0952	5.96372	7.74976	3.6588	6.47495	8.36118	8.69085	6.44714	9.09841	9.81098	8.30395	2.89884	1.80295	3.62782	7.5045	10.1799	0
OTU_71	OTU_71;Bacteria;Firmicutes;Clostridia;Clostridiales;Christensenellaceae;?;?	8.50221	8.21478	8.86568	6.72895	3.32992	1.16898	3.86343	6.49286	7.68693	10.6122	2.89288	0	6.86516	9.69926	7.94246	8.87415	6.7276	9.32174	7.79976	9.78669	5.85454	8.88529	10.798	1.8427	4.12787	0	3.20393	5.51388	6.80276	9.60595	5.46827	8.18696	6.2477	5.78775	5.689	7.86146
OTU_72	OTU_72;Bacteria;Firmicutes;Clostridia;Clostridiales;Ruminococcaceae;?;?	7.84453	9.2104	6.32186	9.46237	1.00445	2.24658	2.06674	5.27878	7.95384	7.28584	9.30493	9.01257	0	6.82718	5.90007	9.58515	9.0875	0	7.43503	8.40564	7.19541	10.6054	1.63903	7.59781	9.13763	8.354	7.93487	7.27977	0	7.99799	7.31494	7.80335	7.83438	7.83029	8.14601	8.65408
OTU_73	OTU_73;Bacteria;Bacteroidetes;Bacteroidia;Bacteroidales;S24-7;?;?	0	1.3788	9.53468	1.05117	0	2.58354	1.37556	2.82786	1.2893	0	2.07511	0	0	2.39153	5.74531	3.16508	0	5.19833	1.66181	1.77559	4.63703	0	11.4428	7.20119	0	1.58553	8.02104	1.23531	3.08602	2.72321	2.89884	12.2061	2.01071	3.31124	2.15357	0
OTU_74	OTU_74;Bacteria;Bacteroidetes;Bacteroidia;Bacteroidales;S24-7;?;?	0	0	0	5.49058	7.03118	3.08596	0	0	0	8.08187	0	0	7.69429	0	8.56071	0	0.966677	0	0	0	0	9.16138	0	5.11389	7.51749	0	4.00541	7.59479	0	7.80264	0	0.871666	0.813487	10.7798	11.3221	6.04082
OTU_75	OTU_75;Bacteria;Firmicutes;Clostridia;Clostridiales;Ruminococcaceae;Oscillospira;?	7.71072	9.26772	8.23288	7.92033	4.33037	4.6988	4.72874	5.98236	8.48257	6.76791	5.87891	7.81396	8.84984	2.88181	7.27499	7.90746	5.66179	9.24125	9.38508	7.22942	6.39263	8.2648	7.39275	7.27533	7.66799	6.68734	6.37758	7.54335	2.87558	8.24596	9.65178	8.14105	7.71464	7.59438	7.66788	8.56461
OTU_76	OTU_76;Bacteria;Firmicutes;Bacilli;Lactobacillales;Enterococcaceae;Enterococcus;?	6.40741	7.32419	7.03299	2.40294	3.5931	5.77311	4.89261	1.15059	5.91188	8.47327	4.34217	12.1847	5.7797	9.81261	5.63207	9.81314	6.08328	8.55084	9.95602	7.59761	9.28851	7.50772	10.2427	7.90857	5.63032	3.32269	2.97187	8.86692	2.7576	4.76284	2.46487	4.54868	3.10006	2.84392	3.94223	4.11996
OTU_77	OTU_77;Bacteria;Firmicutes;Bacilli;Bacillales;Bacillaceae;?;?	7.50619	0	0	2.07608	0	0	0	0	6.968	0	0	1.66677	0	0	0	0	0	0	0	11.3883	8.07354	0	0	10.2427	0	0	0	10.7365	0	0	0	0	10.7942	0	8.59738	6.14617
OTU_78	OTU_78;Bacteria;Firmicutes;Clostridia;Clostridiales;Lachnospiraceae;Dorea;?	5.99343	6.84092	4.94156	3.25967	2.81497	0	0	1.78244	7.95384	8.67242	0	5.07148	2.76106	8.42162	6.28428	4.94893	1.54036	0	4.50089	5.59287	4.17461	4.79593	1.04074	5.00188	6.69433	0	1.24434	8.46402	11.7227	7.31416	5.02881	6.55359	5.33584	3.31124	5.44431	4.73605
OTU_79	OTU_79;Bacteria;Firmicutes;Clostridia;Clostridiales;Christensenellaceae;?;?	7.29049	6.72565	7.40968	5.38349	5.59366	6.09635	4.54385	4.92034	6.89985	7.70496	5.41882	8.62454	6.1754	8.18948	7.86939	8.86184	6.79114	7.16856	8.577	7.9903	7.13833	8.57884	8.48527	9.45272	5.26845	6.61555	6.40114	6.66134	8.48497	8.52244	8.4014	8.50625	7.61782	6.04941	8.18073	8.50926
OTU_80	OTU_80;Bacteria;Firmicutes;Bacilli;Lactobacillales;Streptococcaceae;Streptococcus;?	8.20457	6.62397	7.13242	6.9199	6.51658	8.64125	7.81923	6.62356	8.15728	8.13257	6.88633	7.7715	7.56818	7.69339	6.81198	8.62028	7.79084	8.93988	8.0322	8.40564	8.18485	6.90835	9.67272	7.25104	7.19573	8.17077	6.2009	9.43683	6.12052	6.83685	5.05707	6.00142	4.47305	5.14289	4.92214	5.56413
OTU_81	OTU_81;Bacteria;Bacteroidetes;Bacteroidia;Bacteroidales;S24-7;?;?	7.67667	0	6.85389	0	1.00445	0	0	3.72251	0	0	10.2439	0	0	0	0	0	0	0	0	0	0	9.80702	0	0	0	0	1.24434	0	0	11.4021	0	0.871666	0	0	0	0
OTU_82	OTU_82;Bacteria;Bacteroidetes;Bacteroidia;Bacteroidales;S24-7;?;?	5.75318	4.89769	0	0	0	4.89317	0	2.22037	5.37276	5.91951	9.09629	7.1088	0	0	6.08355	6.88942	0	7.07612	0	4.51185	2.74118	6.53011	7.52286	0	6.78097	0	7.75455	6.51947	0	0.69831	9.18708	8.08484	8.4551	10.1419	9.71776	3.25548
OTU_83	OTU_83;Bacteria;Firmicutes;Clostridia;Clostridiales;Dehalobacteriaceae;Dehalobacterium;?	8.12684	9.19275	7.96018	8.53493	2.59237	3.75331	3.86343	1.15059	7.30748	6.59276	6.28781	7.46905	6.45425	7.36208	9.08647	8.05527	4.88899	6.41497	7.88808	5.79533	6.20522	5.95293	8.36551	8.25853	4.46346	1.58553	1.24434	5.67552	7.596	7.51903	8.12927	8.88613	6.94193	6.01919	7.87637	7.49053
OTU_84	OTU_84;Bacteria;Firmicutes;Bacilli;Lactobacillales;Lactobacillaceae;Lactobacillus;reuteri	9.2684	6.12561	4.23556	8.0427	3.17782	7.80243	8.65414	4.73449	8.45908	5.70656	4.6498	3.81251	7.1061	1.6432	7.62496	9.73434	6.06283	3.31165	4.50089	7.58855	2.14134	4.34992	8.01078	7.57841	6.19656	5.49269	4.42872	7.93532	6.13242	9.05043	8.9831	8.47295	4.37113	5.3991	5.89815	3.86169
OTU_85	OTU_85;Bacteria;Firmicutes;Clostridia;Clostridiales;Ruminococcaceae;?;?	6.78306	5.56727	7.06995	6.66941	5.46811	1.16898	4.72874	5.56565	6.86452	6.63356	5.95562	8.35426	6.25032	7.82081	7.25601	7.34331	4.97905	6.11802	6.82699	6.33958	6.8843	8.09004	6.92517	8.23395	5.26845	8.0507	9.46929	8.25607	7.90434	7.96961	7.50132	7.45329	8.27984	6.41711	7.66788	7.86146
OTU_86	OTU_86;Bacteria;Firmicutes;Clostridia;Clostridiales;?;?;?	5.6633	5.83334	2.39152	12.3562	0	3.08596	2.06674	3.25403	3.03922	5.36268	1.38232	3.278	3.41028	1.6432	5.2267	5.48653	4.02408	3.31165	3.80579	2.21278	5.39027	3.35533	5.24811	3.131	4.87712	2.58567	3.40378	2.68196	3.50752	4.25213	5.80465	4.74001	5.00251	3.40774	4.86637	5.24981
OTU_87	OTU_87;Bacteria;Firmicutes;Clostridia;Clostridiales;?;?;?	7.87488	7.52559	6.64936	7.78661	4.25634	2.24658	3.50659	5.60234	6.13579	5.91951	6.22721	7.90841	4.90182	8.26113	8.48935	7.64563	8.10773	8.72669	7.79274	7.71043	5.46647	6.86329	5.53802	6.19831	6.3502	4.64467	5.19364	7.87001	4.68816	8.05989	4.97057	7.18369	6.30411	7.40864	7.30325	9.16988
OTU_88	OTU_88;Bacteria;Firmicutes;Clostridia;Clostridiales;Ruminococcaceae;Oscillospira;?	9.38721	8.53418	4.09921	7.31909	0	0	0.845868	1.15059	3.80703	5.85196	4.22309	0	1.54909	7.76556	5.63207	3.45448	9.56383	7.73682	5.83964	2.81956	5.53883	4.79593	9.03149	4.15496	3.58359	1.58553	2.97187	8.69372	3.50752	4.97762	8.53801	7.88665	6.7111	8.15269	5.21791	4.11996
OTU_89	OTU_89;Bacteria;Proteobacteria;Gammaproteobacteria;Enterobacteriales;Enterobacteriaceae;Salmonella;enterica	0	0.848202	0	0	5.40099	2.24658	0	2.55586	0	10.916	3.95065	8.93776	10.7621	12.072	3.18569	9.19669	5.42595	0.994296	0	1.77559	2.14134	2.89994	0	0	0	1.00043	0	0	0	2.72321	0	0	0	0	0	0
OTU_90	OTU_90;Bacteria;Firmicutes;Clostridia;Clostridiales;Ruminococcaceae;?;?	10.3667	7.18831	0.887072	1.65279	0	0	0	0	0	9.31696	0	1.66677	0	6.82718	1.5968	0	0	1.99144	10.6215	3.04812	6.29153	3.47996	0	8.72773	0	0	2.97187	4.87974	0	5.18936	2.76817	3.99421	7.05308	6.66175	4.7167	4.61543
OTU_91	OTU_91;Bacteria;Firmicutes;Erysipelotrichi;Erysipelotrichales;Erysipelotrichaceae;[Eubacterium];dolichum	5.32522	4.7338	5.38447	4.00098	3.91518	8.48915	7.78313	6.16516	5.68771	8.99168	6.16395	4.02016	6.38942	7.60173	7.90639	8.93414	5.86443	7.42326	7.25257	4.58652	4.70151	8.7649	5.20741	9.40121	5.63032	4.95502	1.90235	5.42572	6.53336	8.40545	0	6.74431	4.85926	4.52182	6.59141	7.94308
OTU_92	OTU_92;Bacteria;Firmicutes;Clostridia;Clostridiales;Ruminococcaceae;Ruminococcus;?	0.859495	0	8.76505	0	0	5.56057	0	0	0	0	7.05272	3.278	0	5.86633	0	0	0	0	2.08617	1.14528	5.08661	0	0	8.76681	8.46203	0	6.27928	10.5523	0	0	1.19639	10.7394	0	0.754146	0	0
OTU_93	OTU_93;Bacteria;Firmicutes;Clostridia;Clostridiales;?;?;?	7.21341	6.68134	6.87493	3.79353	7.57108	0	4.93082	0	4.07767	8.26831	6.34596	0	2.76106	9.17645	6.28428	4.85272	0	3.68989	1.66181	6.17994	4.82241	1.50936	1.04074	1.8427	0.937883	11.1048	3.73573	8.0577	7.35322	0	6.50414	6.89273	2.96663	3.58329	4.7167	2.18981
OTU_94	OTU_94;Bacteria;Actinobacteria;Coriobacteriia;Coriobacteriales;Coriobacteriaceae;Adlercreutzia;?	7.12359	6.65867	7.51393	6.28907	5.36622	4.55296	3.16566	4.44233	7.62495	7.95883	5.18394	8.33496	7.02307	7.09707	6.86306	8.321	5.74115	8.17843	8.04408	8.33159	8.51142	7.23452	9.73132	8.67392	4.52213	4.52438	1.90235	6.71812	4.09892	5.73603	4.39373	4.06744	5.00251	3.66366	3.94223	4.98355
OTU_95	OTU_95;Bacteria;Bacteroidetes;Bacteroidia;Bacteroidales;S24-7;?;?	6.43483	0	8.2206	7.0423	0	0	1.37556	1.15059	8.05914	0	1.38232	0	0	7.52064	7.40132	8.48241	9.70743	5.68923	7.60504	6.44368	6.57578	0	6.61868	7.5084	7.96621	6.37588	8.86572	6.04455	1.10604	1.16685	1.55458	8.90373	2.01071	1.24687	0	7.5792
OTU_96	OTU_96;Bacteria;Firmicutes;Erysipelotrichi;Erysipelotrichales;Erysipelotrichaceae;[Eubacterium];dolichum	0	3.94529	0.887072	0	4.33037	0	3.16566	3.05663	6.968	1.25359	2.54118	8.429	2.27877	0	0	0	0	0	6.88097	5.35728	5.93719	0	10.633	10.8548	0	1.00043	0	0	7.18058	2.8532	0	0	0	0	0	6.78151
OTU_97	OTU_97;Bacteria;Firmicutes;Clostridia;Clostridiales;Ruminococcaceae;?;?	4.84246	6.05791	4.81667	6.28907	2.00667	1.80614	4.93082	0	5.46997	5.81696	4.6498	2.41955	6.05517	6.85391	6.28428	5.82754	3.93687	5.82166	5.72627	4.34981	5.8259	7.54386	6.87407	5.97919	4.68506	4.8588	6.27928	5.28247	7.69159	6.05253	9.34585	8.56433	5.94477	5.85774	5.96606	8.05167
OTU_98	OTU_98;Bacteria;Bacteroidetes;Bacteroidia;Bacteroidales;S24-7;?;?	0.859495	0	0	0	2.81497	0	8.76141	0	0	0	0	0	0	0	0	0	0	0	6.68249	0	0	5.24553	0	0	0	0	0	0	10.7287	3.9948	3.92677	4.06744	3.53659	3.49819	0	0
OTU_99	OTU_99;Bacteria;Firmicutes;Clostridia;Clostridiales;Ruminococcaceae;?;?	6.71759	4.93591	6.27515	3.08838	4.65238	1.16898	4.68469	4.86101	6.968	6.0458	3.79234	7.1088	5.50161	7.22545	4.87509	0	4.25794	0.994296	7.80675	7.75157	7.16143	6.65434	0	6.89117	5.4607	1.00043	5.87042	10.6332	1.44827	8.32651	6.19638	5.73541	6.30411	0	6.34843	5.52001
OTU_100	OTU_100;Bacteria;Firmicutes;Clostridia;Clostridiales;Ruminococcaceae;Oscillospira;?	9.19612	0	6.75525	7.33834	0	0	0	0	7.43335	0	0	6.65894	0	4.72699	8.40569	6.33447	4.02408	5.07637	0	9.73223	4.98666	5.50221	0	6.4106	3.46896	0	4.00541	7.58465	0	8.63968	5.48916	8.15372	6.3978	2.97569	0	2.18981
OTU_101	OTU_101;Bacteria;Firmicutes;Clostridia;Clostridiales;?;?;?	0	7.80395	4.47479	8.71504	1.59089	1.16898	1.37556	3.85005	2.76051	0	4.90322	0	4.03655	3.78046	6.08355	7.76936	0	0.994296	0	4.91099	10.5916	0.943674	0	0	8.61137	6.21029	0	9.50025	1.44827	4.05007	6.678	0	6.38478	0	0	0
OTU_102	OTU_102;Bacteria;Firmicutes;Clostridia;Clostridiales;Ruminococcaceae;Ruminococcus;?	6.91549	5.00944	5.38447	4.55559	3.00777	2.24658	0	2.55586	7.29427	5.91951	2.54118	7.72777	3.85641	6.62475	5.90007	8.0002	5.79174	4.31107	7.62098	5.66356	5.08661	7.78038	7.90019	7.1756	1.50153	4.95502	4.42872	4.31907	5.03099	8.29254	6.94323	7.76534	3.87127	3.40774	7.24976	8.43101
OTU_103	OTU_103;Bacteria;Bacteroidetes;Bacteroidia;Bacteroidales;[Odoribacteraceae];Odoribacter;?	0	0	1.43234	0	0	0	0	0	0	0	1.38232	0	0	0	0	0	0	0	2.41367	0	0	0.943674	0	0	0	0	1.24434	0	4.7818	4.05007	3.12927	11.4011	2.96663	2.14834	2.15357	3.45613
OTU_104	OTU_104;Bacteria;Firmicutes;Clostridia;Clostridiales;Ruminococcaceae;?;?	8.03127	0	7.94534	9.17454	0	0	5.0743	0	5.97947	0	0	3.81251	1.54909	7.67852	9.01487	8.73266	4.97905	5.5434	0	7.39438	5.88262	6.45617	6.00982	3.80054	4.2716	0	4.51763	0	0	0	0.718811	8.09801	0	0	8.78581	0
OTU_105	OTU_105;Bacteria;Firmicutes;Clostridia;Clostridiales;?;?;?	2.34256	3.17034	1.43234	2.89399	0	2.24658	0	1.78244	0	7.91813	0	9.32785	3.65052	1.6432	3.71681	2.80269	0.966677	2.57544	1.66181	0	0	1.50936	3.77478	0	3.05758	8.88959	1.24434	4.87974	1.72468	1.51995	7.08036	3.45382	2.47112	2.97569	9.5564	8.97529
OTU_106	OTU_106;Bacteria;Firmicutes;Clostridia;Clostridiales;Ruminococcaceae;Oscillospira;?	6.23095	5.46643	3.68839	5.22708	1.00445	1.80614	3.50659	3.05663	3.94869	6.13376	2.07511	6.26914	5.43892	4.94158	8.53731	6.50241	3.39826	5.44826	6.47001	4.06648	4.87926	9.92272	6.7378	7.59781	7.81015	0	6.53497	9.30094	3.77378	4.76284	5.28923	6.00142	5.19379	3.66366	5.689	3.78919
OTU_107	OTU_107;Bacteria;Firmicutes;Bacilli;Lactobacillales;Aerococcaceae;Aerococcus;?	3.31592	2.72286	3.11183	0	1.00445	0	0	0	3.03922	11.0091	2.07511	4.76024	6.05517	9.0259	8.59132	7.04988	8.43658	3.79674	8.58109	3.84105	4.76322	3.2189	8.26	2.62612	0	2.00064	2.6952	1.89089	0	3.08257	0	3.21688	0	0.754146	0	0
OTU_108	OTU_108;Bacteria;Firmicutes;Clostridia;Clostridiales;?;?;?	1.39441	5.04484	7.79343	4.18231	8.38823	5.06444	1.37556	2.22037	3.03922	4.24766	1.38232	1.66677	10.4937	0	6.61745	2.31757	1.54036	0.994296	4.27762	0	9.05244	8.18922	2.65224	3.131	3.46896	4.95502	7.78173	7.3652	3.99847	3.45439	2.46487	4.64751	3.71361	5.14289	6.22081	7.46167
OTU_109	OTU_109;Bacteria;Firmicutes;Clostridia;Clostridiales;Christensenellaceae;?;?	6.649	6.34031	6.49488	5.5578	4.25634	2.58354	5.03975	0	0	7.1377	0	0	7.24082	7.22545	6.39255	0	4.25794	6.55855	7.47945	0	5.67351	8.69911	8.85826	0	3.96822	0	2.97187	7.04842	6.93093	0	8.80707	0	6.79222	0	0	0
OTU_110	OTU_110;Bacteria;Firmicutes;Clostridia;Clostridiales;?;?;?	6.33649	3.03603	5.99677	1.65279	6.03111	2.85651	8.10061	7.55203	2.41475	3.75051	2.54118	8.429	0	5.29368	3.71681	5.42094	2.52899	2.57544	1.05802	4.06648	5.53883	1.91466	9.51696	4.04621	3.20812	2.00064	2.6952	2.33998	8.96759	5.63119	0	0	4.70022	6.72867	4.2777	4.84735
OTU_111	OTU_111;Bacteria;Firmicutes;Bacilli;Lactobacillales;Enterococcaceae;Enterococcus;?	2.34256	6.02282	3.94861	4.68149	0	2.85651	3.94038	5.60234	6.40527	8.8901	3.79234	9.85391	6.4222	8.10298	3.18569	7.04988	2.74975	2.99	8.59326	5.59287	4.76322	9.19813	6.66451	8.75821	1.90579	4.46024	0	5.23138	2.87558	5.4784	3.6582	2.11073	0	0.754146	3.57564	2.39916
OTU_112	OTU_112;Bacteria;Bacteroidetes;Bacteroidia;Bacteroidales;Rikenellaceae;?;?	0	0	8.05998	9.09757	9.65992	0	0	0	0	0	8.87222	6.45945	0	7.43471	0	0	0	0	6.89415	0	0	0	0	0	0	0	1.90235	1.23531	7.34301	0.69831	0.718811	8.49302	1.33051	0	1.10418	1.94485
OTU_113	OTU_113;Bacteria;Actinobacteria;Coriobacteriia;Coriobacteriales;Coriobacteriaceae;Adlercreutzia;?	7.00053	7.52559	7.45229	5.00423	6.34862	4.10692	5.48717	4.44233	7.79406	7.38476	3.79234	6.86141	6.45425	6.4949	5.44358	7.61663	3.84405	7.31956	6.84068	7.60661	8.55133	6.62764	8.1886	7.65447	3.68978	4.70126	2.35257	5.47047	3.89049	5.00585	3.86417	1.41118	3.79459	1.24687	4.68481	2.39916
OTU_114	OTU_114;Bacteria;Firmicutes;Bacilli;Lactobacillales;Lactobacillaceae;Pediococcus;acidilactici	0	0	0	0	0	0	0	0	0	0	0	0	0	0	0	0	0	0	0	0	0	0	0	0	0	0	0	0	0	0	10.0412	8.64429	5.06912	4.96402	7.48553	6.69486
OTU_115	OTU_115;Bacteria;Firmicutes;Clostridia;Clostridiales;?;?;?	0	0	2.13674	8.59616	0	4.47411	0.845868	0	0	1.25359	0	0	0	0	10.9943	0	0	0	6.90722	0	0	5.79394	0	1.8427	9.06549	2.80809	0	0	0	0	6.80007	0	7.40865	0	2.87257	0
OTU_116	OTU_116;Bacteria;Firmicutes;Clostridia;Clostridiales;?;?;?	0	0.848202	5.83445	0	0	0	0	0	0	1.25359	0	0	0	9.56818	9.79742	2.31757	0.966677	0	10.569	0	0	0	0	2.62612	0	1.00043	0	0	0	4.5104	7.07346	4.26716	0	0	2.48518	0
OTU_117	OTU_117;Bacteria;Firmicutes;Clostridia;Clostridiales;Ruminococcaceae;Oscillospira;?	2.55739	0.848202	0	2.40294	0	0	0	0	0	0	0	0	0	4.6064	5.63207	0	0.966677	7.24603	0	0	0	0	11.1545	1.19749	1.90579	0	7.4159	1.23531	1.72468	1.51995	1.19639	0.871666	0	0	4.51383	1.6496
OTU_118	OTU_118;Bacteria;Firmicutes;Clostridia;Clostridiales;Lachnospiraceae;Coprococcus;?	6.08281	6.46316	5.01919	5.7711	3.5931	0	2.53209	3.42765	4.96928	4.44395	5.62077	6.26914	4.19667	5.36974	6.49326	5.54926	5.68873	6.67518	7.79274	5.7635	4.08077	4.475	5.20741	6.32008	4.73552	3.46021	4.12344	5.71326	5.7858	6.50231	5.359	9.04641	7.33611	4.56431	6.01818	6.42268
OTU_119	OTU_119;Bacteria;Firmicutes;Clostridia;Clostridiales;?;?;?	0	0	0	0	0	0	0	0	0	0	0	0	0	0	0	0	0	0	6.01886	0	0	0	0	0	0	0	0	0	0	0	10.5747	0	0	0	0.655242	0
OTU_120	OTU_120;Bacteria;Firmicutes;Erysipelotrichi;Erysipelotrichales;Erysipelotrichaceae;Coprobacillus;?	3.19283	6.84092	5.05649	1.05117	2.00667	0	1.37556	4.73449	7.32057	4.84232	4.09329	9.54922	5.96906	7.28559	8.15208	9.02523	0	3.89623	6.11208	8.43625	7.87818	0.943674	5.43601	5.6849	2.69917	4.24873	4.75558	5.75002	2.33167	3.08257	4.04438	3.55913	4.42299	4.7598	5.44431	6.69486
OTU_121	OTU_121;Bacteria;Firmicutes;Clostridia;Clostridiales;Lachnospiraceae;Blautia;producta	2.55739	4.33672	5.01919	2.40294	4.65238	3.61314	3.50659	2.82786	6.77224	5.66779	3.17543	5.07148	3.85641	3.53827	3.18569	7.72929	5.42595	5.19833	8.29332	5.51853	5.93719	6.94124	8.6424	7.54882	2.22122	1.00043	2.35257	5.06624	4.19283	6.10567	3.86417	3.08202	4.31733	4.43289	7.89391	5.82208
OTU_122	OTU_122;Bacteria;Firmicutes;Clostridia;Clostridiales;Ruminococcaceae;?;?	4.80091	7.79358	4.4186	8.24998	5.09608	0	4.01342	5.27878	5.0343	7.17963	6.31718	5.67315	5.30474	1.6432	6.86306	5.03911	2.26824	5.57377	7.41688	2.54783	4.34575	5.95293	6.47175	1.8427	4.52213	3.32269	3.73573	4.94462	6.497	6.14428	6.88923	6.47502	5.71443	5.82317	4.47707	4.73605
OTU_123	OTU_123;Bacteria;Firmicutes;Clostridia;Clostridiales;Ruminococcaceae;Ruminococcus;?	0	0	0.887072	1.05117	3.17782	6.12244	0	0	3.80703	4.53291	2.07511	9.08369	4.59191	2.39153	0	2.31757	0.966677	0	2.08617	2.81956	0	5.17353	7.13506	9.66986	0.937883	0	0	4.41378	0.656514	3.08257	0	0.871666	1.33051	8.40146	0	8.36083
OTU_124	OTU_124;Bacteria;Proteobacteria;Gammaproteobacteria;Pseudomonadales;Moraxellaceae;Acinetobacter;lwoffii	6.21522	5.68415	5.19675	6.1435	3.32992	6.06978	4.27344	5.80483	4.59129	9.29169	5.71205	6.8064	7.39737	8.01096	7.45225	6.40401	8.14225	5.57377	4.1948	6.31783	4.34575	7.1896	6.16667	5.05897	4.2716	5.24876	3.87687	6.10257	0	0	0	2.57982	0	0	0	4.69695
OTU_125	OTU_125;Bacteria;Firmicutes;Bacilli;Turicibacterales;Turicibacteraceae;Turicibacter;?	5.9177	4.89769	5.4699	6.24896	3.46751	3.88105	2.06674	3.05663	2.41475	5.50141	0	1.66677	5.7797	0	6.2073	2.31757	2.94117	2.99	2.08617	0	5.30983	2.48983	2.87651	10.5282	3.20812	5.39315	0	1.89089	2.7576	1.51995	8.05063	2.76732	4.31733	3.09642	3.35023	2.18981
OTU_126	OTU_126;Bacteria;Tenericutes;Mollicutes;RF39;?;?;?	0	0	9.30017	0	0	0	0	9.86402	0	5.78109	8.69337	0	0	0	0	2.31757	6.1814	0	5.5035	0	0	0	0	6.81035	0	0	1.24434	0	1.10604	0	3.12927	1.80295	0	5.57565	0	0
OTU_127	OTU_127;Bacteria;Firmicutes;Clostridia;Clostridiales;Ruminococcaceae;?;?	4.57309	4.81807	5.38447	4.09449	6.6087	0	4.85335	4.35901	7.19823	4.77097	2.89288	4.87161	4.4718	3.78046	3.47555	6.14438	3.84405	2.99	4.81002	4.85167	4.17461	5.93127	6.7661	4.81565	2.69917	0	3.87687	3.18997	6.73413	8.24299	5.38153	5.61844	5.48968	5.08569	7.08849	6.58137
OTU_128	OTU_128;Bacteria;Bacteroidetes;Bacteroidia;Bacteroidales;S24-7;?;?	0	0	0	0	0	0	0	0	0	0	8.50841	5.07148	7.77264	0	0	0	1.54036	0	1.05802	0	0	0.943674	0	0	0	0	0	0	0	3.87747	10.0377	0	2.01071	0	0.655242	0
OTU_129	OTU_129;Bacteria;Firmicutes;Clostridia;Clostridiales;Ruminococcaceae;?;?	3.42933	5.14613	5.26207	3.90098	3.91518	0	2.06674	2.55586	5.51623	5.03738	4.6498	8.2239	4.4718	4.16901	5.94817	4.51835	0	7.94281	5.11037	3.41888	0	7.35334	5.03203	6.0653	3.88125	1.58553	1.24434	6.68052	6.08422	8.4291	5.28923	4.13713	6.0639	2.35609	5.2618	5.30285
OTU_130	OTU_130;Bacteria;Firmicutes;Bacilli;Bacillales;Staphylococcaceae;Jeotgalicoccus;psychrophilus	0.859495	0	5.65152	1.05117	0	3.61314	0.845868	0	4.50216	7.85914	2.07511	4.20165	5.56168	9.16048	7.93054	9.04169	6.75336	0	9.43329	0	5.08661	3.06822	5.69348	5.49107	1.90579	4.52438	4.12344	1.23531	2.33167	5.00585	0	0	0	0	0	0
OTU_131	OTU_131;Bacteria;Firmicutes;Clostridia;Clostridiales;Ruminococcaceae;?;?	7.39889	5.11315	0	3.55115	2.32904	1.16898	3.28848	0	4.82973	7.73339	0	7.21822	3.85641	7.11928	6.78574	3.45448	0.966677	3.79674	7.63676	6.40293	2.14134	5.50221	7.07975	0	3.46896	0	2.6952	7.38871	6.09642	7.26829	1.55458	6.56628	5.10131	4.28829	1.95397	6.16061
OTU_132	OTU_132;Bacteria;Bacteroidetes;Bacteroidia;Bacteroidales;S24-7;?;?	5.83779	5.11315	6.46745	4.95521	7.00881	3.61314	5.29545	3.5826	7.29427	4.77097	0	0	6.21335	5.57648	4.97135	0	4.93472	5.68923	5.89316	6.33958	3.9804	7.02546	5.96168	3.9286	6.26687	0	2.97187	7.29229	7.30671	0	5.82123	0	6.97705	0	0	5.80379
OTU_133	OTU_133;Bacteria;Firmicutes;Clostridia;Clostridiales;Ruminococcaceae;?;?	6.81472	4.97314	0	6.09906	1.00445	0	0	0	3.64993	4.0204	2.07511	5.47575	1.54909	0	4.54052	6.62396	7.8216	7.30153	5.39638	4.58652	6.01537	5.37957	0	7.0823	3.58359	4.39313	2.35257	5.51388	0.656514	5.89541	6.90487	6.7218	4.61359	6.10804	6.98098	4.11996
OTU_134	OTU_134;Bacteria;Firmicutes;Clostridia;Clostridiales;Lachnospiraceae;[Ruminococcus];?	2.55739	4.01836	0.887072	0	2.32904	3.28387	2.88338	0	3.2727	3.21818	1.38232	1.66677	8.24523	2.39153	0	0	0	0.994296	2.90543	3.04812	0	3.47996	6.96234	10.734	1.50153	1.00043	1.24434	0	5.17602	4.72937	2.46487	2.11073	2.65585	3.73978	2.62619	2.74415
OTU_135	OTU_135;Bacteria;Firmicutes;Clostridia;Clostridiales;Lachnospiraceae;?;?	6.48816	7.17239	4.23556	6.85457	5.59366	0	3.69601	9.05782	4.9012	4.44395	6.40186	5.07148	5.15679	6.27517	5.63207	4.51835	0	2.31279	4.10694	3.41888	5.08661	3.70094	5.91188	2.28694	2.22122	1.00043	5.93642	4.2177	1.10604	5.39547	6.37538	6.67571	5.6722	4.23668	5.44431	5.30285
OTU_136	OTU_136;Bacteria;Firmicutes;Clostridia;Clostridiales;?;?;?	7.00967	2.3223	0	5.45576	0	1.16898	2.31809	0	4.19606	3.59393	3.17543	5.54459	0	0	8.82825	5.60937	8.06724	2.57544	5.53751	3.04812	4.34575	5.01776	2.87651	2.28694	5.85236	4.75571	0	1.23531	0	0.69831	8.76485	4.44257	4.74165	5.1979	4.51383	0.776097
OTU_137	OTU_137;Bacteria;Firmicutes;Clostridia;Clostridiales;Dehalobacteriaceae;Dehalobacterium;?	2.09004	6.12561	6.24315	6.8139	0	3.28387	4.01342	3.96722	7.78465	5.26219	3.95065	4.36284	6.09637	0	6.2463	7.74277	4.39513	3.98929	6.24151	3.24538	3.87252	5.47251	3.39445	2.28694	5.43038	4.08826	4.00541	2.33998	6.81758	6.37823	6.48346	5.43691	5.19379	6.03438	5.58917	6.27121
OTU_138	OTU_138;Bacteria;Bacteroidetes;Bacteroidia;Bacteroidales;S24-7;?;?	6.5141	0	5.69947	0	0	5.52189	0	0	5.68771	2.36543	0	5.07148	0	5.86633	2.33612	5.2801	5.14388	4.63289	4.63259	3.41888	4.56954	0	4.32417	5.6849	7.503	7.11979	7.04913	7.03358	8.5463	1.16685	1.55458	0.871666	2.2592	1.90556	5.78237	0
OTU_139	OTU_139;Bacteria;Bacteroidetes;Bacteroidia;Bacteroidales;Rikenellaceae;?;?	0	1.76586	6.25924	6.52571	0	0	8.28892	3.96722	1.2893	1.91407	0	0	7.36402	0	0	0	0	1.57735	7.17906	0	0	0	0	0	0	9.35179	0	0	7.06736	1.51995	0	0.871666	1.33051	0.754146	0	0
OTU_140	OTU_140;Bacteria;Firmicutes;Clostridia;Clostridiales;?;?;?	7.64179	4.4467	1.43234	5.00423	0	1.80614	0	0	6.10585	6.21666	0	0	0	2.88181	0	1.58133	0.966677	8.01098	3.91331	2.81956	0	6.66751	0	0	2.88948	0	0	4.94462	1.44827	4.47044	7.82269	7.16713	6.91502	4.89911	5.87007	1.94485
OTU_141	OTU_141;Bacteria;Bacteroidetes;Bacteroidia;Bacteroidales;S24-7;?;?	6.58924	0	4.67994	0	0	0	0.845868	0	8.28967	0	1.38232	0	0	0	5.8503	4.63863	6.12334	3.98929	1.05802	5.2233	5.39027	0	5.36376	6.29653	6.87401	7.82103	8.93596	6.40884	2.7576	1.16685	0	7.59005	0	1.61348	0	0.776097
OTU_142	OTU_142;Bacteria;Firmicutes;Clostridia;Clostridiales;Lachnospiraceae;Dorea;?	5.26538	5.93119	4.58101	1.05117	2.81497	0	0	1.78244	6.24969	7.70496	3.61449	5.24699	0	4.72699	3.92344	4.51835	4.02408	5.07637	6.66721	5.2233	5.0375	7.81629	6.00982	7.99156	2.4799	3.17068	1.90235	4.58637	3.50752	5.66699	4.15311	3.55913	4.70022	4.43289	5.10195	6.18907
OTU_143	OTU_143;Bacteria;Bacteroidetes;Bacteroidia;Bacteroidales;Porphyromonadaceae;Parabacteroides;?	2.55739	6.96624	5.95787	5.5578	5.96293	3.75331	5.32445	3.25403	6.47718	5.81696	6.60604	5.67315	7.47752	5.442	1.5968	5.2801	5.45763	6.51226	4.43024	6.31783	4.34575	5.97428	5.12239	3.80054	5.16177	4.0008	5.0219	7.07764	4.23759	4.88946	4.09977	4.74001	4.56825	3.58329	3.83008	5.22254
OTU_144	OTU_144;Bacteria;Firmicutes;Clostridia;Clostridiales;?;?;?	4.71405	7.21963	1.43234	3.25967	0	0	0	0	0	0	1.38232	3.81251	4.03655	1.6432	6.08355	6.26141	0.966677	0	7.82063	0	0	3.70094	0	0	9.65939	0	1.24434	1.23531	2.15627	0.69831	3.79873	0	3.43921	0	1.72226	0
OTU_145	OTU_145;Bacteria;Tenericutes;Mollicutes;RF39;?;?;?	5.35423	5.27098	2.39152	0	0	0	0.845868	0	3.47361	0	5.47202	0	0	4.94158	4.10415	0	0	8.29239	5.39638	6.76631	5.60774	5.01776	0	2.62612	8.11182	1.00043	0	0	0	5.00585	5.91686	6.55359	6.03086	6.3819	0	0
OTU_146	OTU_146;Bacteria;Firmicutes;Clostridia;Clostridiales;Ruminococcaceae;?;?	6.92519	0	0	0	0	0	0	0	0	6.41693	5.47202	0	0	0	4.54052	0	0	0	0	0	0	7.79245	0	1.8427	4.87712	0	0	5.1784	0.656514	0	4.39373	8.07155	5.81491	6.40547	7.40952	0
OTU_147	OTU_147;Bacteria;Firmicutes;Clostridia;Clostridiales;Lachnospiraceae;[Ruminococcus];gnavus	7.19749	3.40641	5.76854	7.18733	0	0	0	1.15059	5.87685	3.21818	0	0	0	5.69949	2.33612	4.24277	0.966677	1.99144	8.34224	5.66356	5.88262	0	1.04074	1.8427	3.05758	3.80815	7.91045	0	1.10604	6.86024	3.41784	3.74917	2.81959	5.3991	2.87257	3.25548
OTU_148	OTU_148;Bacteria;Bacteroidetes;Bacteroidia;Bacteroidales;Rikenellaceae;?;?	2.74434	0	0	0	0	0	0	0	1.2893	0	0	0	0	0	2.33612	0	2.26824	0	0	0	0	0	0	0	0.937883	0	0	0	4.09892	4.72937	4.04438	8.68558	3.43921	3.49819	8.73416	1.27797
OTU_149	OTU_149;Bacteria;Proteobacteria;Alphaproteobacteria;RF32;?;?;?	3.05825	8.3412	6.85389	0	0	0	0	0	1.2893	0	0	0	0	6.85391	7.51747	7.70194	5.79174	4.44852	3.68961	0	6.33283	0	6.07914	7.49812	6.92925	5.64469	1.24434	2.95821	0	0	0	0	0	0	3.9952	0
OTU_150	OTU_150;Bacteria;Firmicutes;Clostridia;Clostridiales;?;?;?	5.95606	4.6443	5.65152	1.05117	2.00667	1.80614	0.845868	4.17637	6.32957	6.6133	1.38232	4.63954	0	4.83827	5.44358	6.65282	4.25794	6.89556	5.94476	6.91859	4.70151	7.32869	0	5.78981	0	3.00075	1.24434	6.90905	1.44827	6.30059	1.84129	4.90891	4.47305	4.7598	4.83765	2.88994
OTU_151	OTU_151;Bacteria;Cyanobacteria;4C0d-2;YS2;?;?;?	2.55739	3.17034	1.82711	3.90098	0	1.16898	4.27344	4.92034	2.41475	5.45664	4.22309	5.32734	5.50161	6.4949	1.5968	2.80269	0	0.994296	0	2.81956	0	7.96232	3.07056	0	1.90579	0	3.20393	0	7.35322	4.66001	2.08036	4.54868	3.94407	8.12811	0.655242	0
OTU_152	OTU_152;Bacteria;Firmicutes;Bacilli;Bacillales;Staphylococcaceae;Staphylococcus;sciuri	5.54246	5.63853	7.51393	0	1.00445	3.61314	1.37556	0	4.40717	7.49957	2.07511	4.50781	2.76106	6.46052	2.33612	8.67052	4.63566	0	6.92017	3.71358	3.9804	2.23072	8.27485	4.35057	1.90579	0	0	4.2177	2.15627	3.68139	0	0	0	2.53765	0	2.39916
OTU_153	OTU_153;Bacteria;Firmicutes;Erysipelotrichi;Erysipelotrichales;Erysipelotrichaceae;?;?	0	0	0	0	0	0	0	0	0	0	0	0	6.68783	0	0	0	0	0	0	0	0	0	1.04074	0	0	0	0	0	9.45599	0	0	0	0	0	0	0
OTU_154	OTU_154;Bacteria;Firmicutes;Clostridia;Clostridiales;Ruminococcaceae;Oscillospira;?	4.62162	5.27098	2.13674	5.9062	0	0	1.76215	0	5.76637	3.21818	0	3.81251	1.54909	5.6393	5.79876	5.60937	5.93364	7.45624	3.68961	4.65751	1.09575	6.34585	3.39445	4.94243	6.56076	0	3.87687	4.7405	3.08602	6.50231	6.62234	5.94424	3.87127	4.89911	3.83008	3.9966
OTU_155	OTU_155;Bacteria;Firmicutes;Clostridia;Clostridiales;Lachnospiraceae;Coprococcus;?	2.74434	4.39276	2.96261	5.45576	5.89137	5.86869	5.35287	7.99994	4.40717	1.25359	6.53282	2.41955	4.99191	4.72699	4.87509	0	5.956	3.89623	4.10694	3.95816	3.75591	5.34721	1.63903	3.32967	5.80588	5.4271	6.2009	5.63678	5.69242	3.28043	3.79873	0	5.58382	5.3991	2.48518	5.84013
OTU_156	OTU_156;Bacteria;Firmicutes;Clostridia;Clostridiales;Lachnospiraceae;Lachnobacterium;?	5.32522	6.23695	3.78045	2.66926	0	0	0	2.22037	6.40527	6.76791	2.07511	5.90028	3.41028	7.11928	3.92344	4.24277	2.94117	3.31165	5.96988	4.06648	5.18008	5.79394	3.39445	6.24826	1.50153	2.00064	3.73573	8.79396	1.44827	5.78572	3.01865	4.32803	4.01338	4.43289	4.51383	4.77411
OTU_157	OTU_157;Bacteria;Firmicutes;Clostridia;Clostridiales;Lachnospiraceae;Roseburia;faecis	6.2465	6.19028	5.22978	1.05117	0	0	0	1.15059	8.34197	2.98582	0	5.40345	4.70277	2.88181	6.46046	5.60937	0.966677	0.994296	5.43298	5.85696	4.17461	4.69668	1.04074	4.43925	0	2.32261	2.6952	5.00671	2.7576	7.34764	4.67476	3.74917	5.94477	2.35609	4.94924	4.1779
OTU_158	OTU_158;Bacteria;Firmicutes;Clostridia;Clostridiales;?;?;?	4.52286	5.74999	2.39152	7.45754	0	1.80614	1.37556	2.55586	3.94869	2.36543	4.97868	5.84676	7.42997	0	4.10415	0	0.966677	0	2.6804	2.54783	5.18008	3.97954	2.06069	5.11389	5.548	0	4.00541	2.33998	6.70255	4.47044	5.701	7.03644	5.22334	6.13648	3.70846	4.1779
OTU_159	OTU_159;Bacteria;Firmicutes;Clostridia;Clostridiales;?;?;?	4.1117	3.40641	3.59006	0	0	0	0	0	4.96928	4.53291	3.61449	5.95188	0	4.16901	6.4269	6.91346	0	4.15913	7.20045	3.84105	5.76687	4.59009	1.04074	5.8876	5.00604	3.46021	4.51763	3.72125	1.72468	5.35214	4.63782	3.99421	7.53186	5.05622	6.79931	2.88994
OTU_160	OTU_160;Bacteria;Firmicutes;Clostridia;Clostridiales;Ruminococcaceae;Oscillospira;?	3.96894	5.74999	7.86351	0	4.33037	0	0	3.96722	5.68771	5.36268	3.61449	4.975	5.43892	6.15133	6.2463	5.42094	2.26824	2.79756	4.27762	8.26495	5.0375	3.06822	1.04074	3.66	2.69917	1.58553	1.24434	5.12341	0	6.24246	0	3.55913	5.4402	2.53765	4.61883	0
OTU_161	OTU_161;Bacteria;Firmicutes;Clostridia;Clostridiales;Ruminococcaceae;?;?	0	6.98459	5.22978	7.15513	2.32904	3.61314	0	1.15059	6.04405	3.41825	4.09329	0	4.19667	5.21338	7.45225	4.85272	3.26138	5.5434	5.39638	5.88681	0	4.13927	2.65224	0	6.60214	3.32269	1.90235	5.12341	1.10604	3.74975	6.2946	5.19693	4.01338	4.68475	4.89453	4.4838
OTU_162	OTU_162;Bacteria;Firmicutes;Clostridia;Clostridiales;Lachnospiraceae;?;?	3.31592	3.70087	3.59006	4.79728	2.00667	2.24658	4.33173	6.71017	3.64993	5.20918	2.89288	2.9117	5.0767	5.442	6.46046	4.08234	0.966677	2.79756	4.50089	1.77559	0	4.74716	8.31372	4.88043	5.04658	2.58567	5.08145	0	6.52436	5.35214	4.94054	5.13014	4.42299	3.73978	4.61883	3.35929
OTU_163	OTU_163;Bacteria;Bacteroidetes;Bacteroidia;Bacteroidales;S24-7;?;?	0	0	0	0	0	0	0	0	0	0	0	0	0	0	0	0	0	0	0	0	0	0	0	0	0	0	0	0	0.656514	0	0	9.89847	0	0	0	0
OTU_164	OTU_164;Bacteria;Proteobacteria;Alphaproteobacteria;RF32;?;?;?	0	4.33672	2.39152	1.65279	2.59237	5.11729	4.63925	4.86101	3.80703	4.53291	5.18394	2.41955	2.27877	2.88181	4.66087	0	0.966677	0	5.83964	3.71358	0	6.719	0	1.8427	0.937883	1.58553	3.20393	0	3.89049	3.08257	6.19638	7.23227	5.58382	2.97569	5.70499	7.68289
OTU_165	OTU_165;Bacteria;Firmicutes;Bacilli;Lactobacillales;Aerococcaceae;Facklamia;?	1.39441	3.03603	5.69947	4.41764	5.33059	6.48615	6.41817	5.52799	5.60452	5.85196	4.45216	0	4.90182	4.47481	1.5968	6.78902	4.88899	5.4151	0	6.05403	5.08661	3.7999	7.99293	3.66	1.90579	5.08829	3.73573	3.72125	4.68816	4.42934	3.32791	2.57982	2.01071	0.754146	1.72226	4.88263
OTU_166	OTU_166;Bacteria;Firmicutes;Clostridia;Clostridiales;Ruminococcaceae;Oscillospira;?	4.30241	8.41409	0.887072	1.05117	0	0	0	1.15059	0	4.53291	0	0	0	3.98778	9.04283	5.03911	1.54036	0.994296	4.63259	0	2.14134	2.23072	1.63903	1.8427	1.90579	0	1.90235	6.18544	1.72468	2.42175	5.08479	2.57982	2.96663	3.58329	6.73068	2.39916
OTU_167	OTU_167;Bacteria;Bacteroidetes;Bacteroidia;Bacteroidales;[Odoribacteraceae];Odoribacter;?	0	0	0.887072	0	0	0	0	0	0	0	0	0	0	0	0	0	0	0	0	0	0	0	0	0	0	0	1.24434	0	3.35337	2.72321	2.46487	9.75898	2.01071	1.90556	2.98159	2.58194
OTU_168	OTU_168;Bacteria;Firmicutes;Clostridia;Clostridiales;?;?;?	5.49114	4.01836	5.32457	4.00098	3.17782	2.58354	0.845868	2.22037	4.50216	4.53291	0	2.41955	3.65052	5.12834	4.26472	3.16508	4.02408	4.44852	6.08933	2.81956	2.14134	5.47251	2.87651	5.61046	0	2.80809	5.08145	2.95821	3.4325	5.35214	5.86983	5.16392	4.89643	4.12757	7.41924	5.78527
OTU_169	OTU_169;Bacteria;Firmicutes;Clostridia;Clostridiales;?;?;?	0	5.41323	0	0	0	0	0	0	0	0	2.07511	0	0	0	0	0	0	0	0	0	0	9.43404	0	3.9286	7.39725	0	0	0	0	0	3.6582	0	0	0	4.89453	0
OTU_170	OTU_170;Bacteria;Firmicutes;Clostridia;Clostridiales;Ruminococcaceae;Oscillospira;?	4.36076	4.68974	4.29919	4.2651	1.00445	0	0	0	3.94869	5.36268	2.89288	4.50781	4.03655	4.47481	5.50918	5.48653	0	4.89584	3.27151	4.06648	4.42427	6.53011	7.04552	3.9286	1.50153	1.58553	0	1.89089	5.67625	6.11866	5.19063	5.77966	5.46515	3.09642	5.50035	5.84013
OTU_171	OTU_171;Bacteria;Bacteroidetes;Bacteroidia;Bacteroidales;S24-7;?;?	0	0	0	0	3.91518	0	0	0	1.2893	4.97525	0	0	4.59191	0	4.87509	0	0	0	0	1.14528	0	5.7451	0	2.28694	3.78869	0	1.90235	5.1784	0	4.66001	0	0	0	7.83029	8.19212	1.94485
OTU_172	OTU_172;Bacteria;Bacteroidetes;Bacteroidia;Bacteroidales;S24-7;?;?	0	0	0	0	0	0	0	0	3.64993	0	0	0	0	5.36974	4.26472	4.51835	3.74484	4.51263	4.43024	3.71358	1.09575	0	0	0	6.71962	0	0	0	1.44827	0.69831	1.84129	7.64491	3.10006	0.754146	8.30394	0
OTU_173	OTU_173;Bacteria;Firmicutes;Clostridia;Clostridiales;Ruminococcaceae;Oscillospira;?	3.72422	5.27098	2.39152	4.79728	4.70898	3.75331	4.72874	2.82786	3.2727	4.34914	6.42902	5.84676	3.12189	3.24706	1.5968	5.12399	3.52327	3.31165	3.10005	0	1.71126	7.10503	3.39445	2.62612	2.4799	2.00064	3.20393	3.99072	5.08097	6.02521	4.15311	5.59387	5.33584	4.79591	5.48191	6.18907
OTU_174	OTU_174;Bacteria;Firmicutes;Clostridia;Clostridiales;?;?;?	5.26538	2.53644	4.52888	1.65279	3.17782	1.16898	2.7184	0	0	3.75051	4.34217	2.9117	4.80573	1.6432	5.06158	5.42094	6.3763	3.57449	3.42473	0	4.08077	3.7999	0	3.32967	0	4.90771	0	4.81179	6.81758	6.18188	0	6.61594	4.93266	5.42239	4.40059	5.97698
OTU_175	OTU_175;Bacteria;Bacteroidetes;Bacteroidia;Bacteroidales;Rikenellaceae;?;?	0	0	0.887072	0	0	1.16898	0	0	0	0	0	0	0	0	0	0	0	0	0	0	0	0	0	0	0	0	9.12824	0	7.17484	2.24355	0.718811	8.10237	1.71033	0.754146	0.655242	1.27797
OTU_176	OTU_176;Bacteria;Firmicutes;Clostridia;Clostridiales;Ruminococcaceae;?;?	4.1117	4.39276	5.85577	5.3074	1.00445	1.80614	0.845868	0	4.19606	6.29505	3.95065	2.9117	4.80573	3.24706	3.71681	5.92538	1.94972	4.57401	5.46867	2.54783	4.76322	5.17353	4.72109	5.11389	1.90579	0	2.35257	1.89089	2.15627	5.59448	7.00256	5.0601	0	3.81209	6.53886	3.78919
OTU_177	OTU_177;Bacteria;Firmicutes;Clostridia;Clostridiales;Lachnospiraceae;[Ruminococcus];?	4.17811	4.6443	2.60798	5.22708	1.59089	4.10692	2.7184	7.72838	2.76051	3.75051	2.07511	3.81251	3.12189	5.5108	3.18569	0	2.26824	3.79674	3.80579	2.21278	5.70531	4.06162	3.98203	4.94243	4.12787	5.13011	4.00541	2.68196	4.62217	4.25213	7.72918	3.91707	0.813487	1.61348	3.42934	3.93072
OTU_178	OTU_178;Bacteria;Firmicutes;Clostridia;Clostridiales;Ruminococcaceae;Ruminococcus;bromii	0	0	0	0	0	0	0	1.15059	0	0	0	11.0436	0	0	0	0	0	0	0	0	0	0	0	0	0	0	0	2.33998	0	0	0	0	0	0	0	0
OTU_179	OTU_179;Bacteria;Firmicutes;Clostridia;Clostridiales;Ruminococcaceae;?;?	4.04209	4.89769	5.12832	2.66926	3.17782	2.58354	2.06674	2.22037	0	5.78109	2.07511	5.40345	3.85641	4.6064	0	0	2.26824	2.79756	3.27151	0	3.87252	6.78088	6.22901	5.21782	0	1.00043	0	1.89089	5.62663	0	0	5.09554	0	2.97569	4.86637	7.94308
OTU_180	OTU_180;Bacteria;Firmicutes;Clostridia;Clostridiales;?;?;?	4.1117	6.07513	1.82711	6.69949	3.00777	0	0	0	1.2893	0	0	0	0	2.88181	8.16232	9.05796	5.39357	0	2.6804	3.71358	3.48995	0	5.2877	4.35057	7.6083	1.00043	1.24434	3.99072	0	0	0	1.80295	2.01071	0	0	0
OTU_181	OTU_181;Bacteria;Firmicutes;Clostridia;Clostridiales;Lachnospiraceae;?;?	6.85587	6.58842	5.01919	1.05117	0	1.16898	0	1.15059	5.15616	8.93568	1.38232	1.66677	0	4.94158	6.16722	4.38713	0	0	3.80579	4.16723	2.9678	4.06162	0	2.62612	0	1.00043	0	1.89089	0	1.51995	4.39373	5.38055	1.33051	2.53765	5.50035	1.94485
OTU_182	OTU_182;Bacteria;Firmicutes;Clostridia;Clostridiales;Ruminococcaceae;?;?	4.71405	4.85843	3.68839	3.67742	0	2.24658	2.88338	1.15059	1.2893	3.41825	1.38232	2.41955	4.59191	5.442	5.1465	0	1.54036	2.79756	2.41367	2.54783	2.74118	4.59009	5.07792	6.689	0	5.49269	4.23254	3.18997	1.44827	2.8532	6.43044	7.32478	3.43921	3.73978	5.99236	5.82208
OTU_183	OTU_183;Bacteria;Firmicutes;Clostridia;Clostridiales;Ruminococcaceae;?;?	6.18324	5.54271	3.59006	6.28907	1.59089	2.24658	0	1.15059	5.15616	0	4.34217	0	2.76106	4.83827	6.93644	4.85272	4.45913	4.38143	4.27762	3.24538	3.16361	0	5.98595	5.00188	4.2716	0	1.24434	4.41378	1.44827	2.8532	7.26735	5.43691	3.87127	2.14834	3.64358	3.54688
OTU_184	OTU_184;Bacteria;Actinobacteria;Actinobacteria;Actinomycetales;Corynebacteriaceae;Corynebacterium;stationis	0	0	5.91789	0	0	0	0	0	6.63224	7.24692	1.38232	4.63954	2.76106	5.29368	5.30267	6.33447	5.63433	0	8.70222	0	3.48995	0	5.32623	1.8427	0	0	4.51763	0	1.10604	4.91945	0	0	0	0	0	0.776097
OTU_185	OTU_185;Bacteria;Firmicutes;Clostridia;Clostridiales;Ruminococcaceae;?;?	3.42933	0	4.4186	2.89399	2.32904	1.16898	2.88338	0	5.21344	0	3.79234	0	5.0767	4.72699	4.77196	4.63863	2.52899	0	6.85423	5.94473	4.56954	6.2788	6.14528	4.60177	0	3.00075	4.12344	0	5.92913	4.66001	5.42555	0	3.43921	2.53765	4.2777	6.41065
OTU_186	OTU_186;Bacteria;Firmicutes;Erysipelotrichi;Erysipelotrichales;Erysipelotrichaceae;Allobaculum;?	4.47083	0	0.887072	1.05117	2.81497	3.61314	2.31809	1.15059	4.50216	0	0	8.96313	0	0	0	0	2.94117	0	0	3.57374	4.70151	0	0	1.8427	1.90579	3.00075	1.24434	2.95821	3.08602	3.45439	8.21643	1.80295	3.43921	2.6989	2.48518	3.35929
OTU_187	OTU_187;Bacteria;Firmicutes;Erysipelotrichi;Erysipelotrichales;Erysipelotrichaceae;Holdemania;?	0	0	7.01416	0	0	0	0	0	0	0	5.57287	5.73337	6.63288	0	0	0	0	0	1.05802	0	4.82241	0	9.25015	4.81565	0	0	0	0	0	0	0	0	0	0	0	0
OTU_188	OTU_188;Bacteria;Bacteroidetes;Bacteroidia;Bacteroidales;S24-7;?;?	3.42933	0	2.39152	0	0	0	0	0	8.36743	0	0	0	0	4.72699	3.92344	3.69541	0	4.74388	6.13447	4.78981	1.09575	0	5.32623	4.04621	6.64237	7.13013	6.30449	4.66549	2.7576	3.08257	3.12927	3.45382	3.87127	3.31124	3.70846	3.14362
OTU_189	OTU_189;Bacteria;Bacteroidetes;Bacteroidia;Bacteroidales;S24-7;?;?	2.74434	5.61516	0.887072	4.95521	0	3.28387	0	0	1.2893	0	0	3.81251	5.82942	2.88181	4.26472	2.31757	6.97748	3.31165	0	1.14528	4.34575	0	2.06069	2.62612	6.06461	7.17077	7.24414	5.55602	0.656514	0	0	3.65728	0	0.754146	6.58278	0
OTU_190	OTU_190;Bacteria;Firmicutes;Clostridia;Clostridiales;[Mogibacteriaceae];?;?	6.33649	0	3.37067	5.00423	0	0	0	3.42765	0	0	4.22309	5.6103	4.59191	3.53827	4.10415	6.59452	5.54868	0	0	1.14528	0	6.98397	0	2.62612	0	3.00075	0	0	7.72341	0	0	5.26077	0	0	0	0
OTU_191	OTU_191;Bacteria;Firmicutes;Clostridia;Clostridiales;?;?;?	5.70894	5.24076	1.43234	8.58009	0	2.24658	0.845868	0	1.2893	1.91407	2.89288	3.278	4.19667	4.47481	4.77196	1.58133	3.26138	0	2.90543	0	1.71126	0	0	1.19749	4.05025	2.80809	1.90235	3.18997	3.50752	2.72321	6.85745	4.26716	4.26145	3.73978	3.77055	1.27797
OTU_192	OTU_192;Bacteria;Firmicutes;Clostridia;Clostridiales;Lachnospiraceae;?;?	8.60838	0	0	4.55559	0	0	0	0	0	0	0	3.278	0	0	0	0	0	6.70292	6.36028	0	0	0	0	0	0	0	0	0	0	0	6.79169	0	0.813487	0	0	0
OTU_193	OTU_193;Bacteria;Actinobacteria;Coriobacteriia;Coriobacteriales;Coriobacteriaceae;Adlercreutzia;?	0	7.00271	0	2.40294	3.91518	0	5.03975	0	2.41475	5.78109	6.34596	4.50781	2.27877	7.53723	0	5.42094	0.966677	2.99	4.69419	2.21278	3.9804	6.01605	6.7661	4.5228	0	2.58567	0	1.23531	4.81171	4.5104	0	0	0	4.12757	4.09564	0
OTU_194	OTU_194;Bacteria;Firmicutes;Clostridia;Clostridiales;Ruminococcaceae;?;?	6.67223	3.70087	4.77252	5.85367	0	1.80614	0	0	0	5.66779	2.07511	2.41955	2.76106	5.69949	7.02881	1.58133	3.39826	4.2371	0	3.41888	0	4.34992	1.04074	5.36091	3.78869	0	1.24434	4.31907	3.71168	4.54928	4.5999	6.82043	4.20331	4.23668	4.31984	1.94485
OTU_195	OTU_195;Bacteria;Firmicutes;Erysipelotrichi;Erysipelotrichales;Erysipelotrichaceae;?;?	5.32522	4.85843	0	3.25967	0	2.58354	3.50659	0	6.04405	0	0	0	0	4.6064	3.47555	6.88942	0	0	4.81002	6.59603	1.71126	0	0	0	0	1.58553	0	4.87974	0	0	7.12108	6.27313	1.71033	0	6.16411	0
OTU_196	OTU_196;Bacteria;Bacteroidetes;Bacteroidia;Bacteroidales;S24-7;?;?	0	0	0	0	0	0	0	0	0	0	0	0	0	0	0	0	0	0	0	0	0	0	5.8603	0	0	0	0	0	8.71209	0	0	0	0	0	0	0
OTU_197	OTU_197;Bacteria;Firmicutes;Clostridia;Clostridiales;Ruminococcaceae;Oscillospira;?	2.09004	3.2932	3.48453	4.34338	1.59089	3.61314	1.76215	0	6.45361	2.36543	4.34217	4.20165	3.12189	2.39153	5.79876	8.02248	5.51897	2.31279	4.27762	5.2233	3.62905	4.53369	4.83235	6.19831	4.12787	4.46024	5.13864	3.99072	0.656514	4.34346	4.15311	4.32803	2.47112	4.47804	2.98159	4.0596
OTU_198	OTU_198;Bacteria;Bacteroidetes;Bacteroidia;Bacteroidales;S24-7;?;?	0	0	0	9.62008	0	0	0	0	0	0	0	0	0	0	0	0	0	0	0	0	0	0	0	0	0	0	0	1.23531	0	0	0	0	0	0	0	0
OTU_199	OTU_199;Bacteria;Cyanobacteria;4C0d-2;YS2;?;?;?	5.03394	1.3788	0	0	1.00445	0	0	0	0	0	1.38232	0	0	0	0	0	0	0	8.93692	0	1.71126	0	5.93699	0	0	0	0	7.01859	0	0	0	0	3.33478	0	4.77844	0
OTU_200	OTU_200;Bacteria;Tenericutes;Mollicutes;RF39;?;?;?	0	1.76586	0	0	0	0	0	0	3.47361	0	1.38232	0	1.54909	4.6064	0	5.48653	3.84405	6.85903	8.09635	6.79808	7.21763	0	0	0	4.33843	0	1.24434	0	0	1.8034	0	0	0	0	0	0
OTU_201	OTU_201;Bacteria;Firmicutes;Clostridia;Clostridiales;?;?;?	0.859495	0	4.67994	0	1.59089	5.89919	5.56212	3.96722	5.68771	3.59393	0	0	0	1.6432	6.88794	2.31757	3.39826	2.57544	0	5.07558	3.75591	0	5.24811	4.35057	1.90579	4.46024	3.40378	0	0	7.06193	0	3.91707	0	4.43289	0	0
OTU_202	OTU_202;Bacteria;Firmicutes;Clostridia;Clostridiales;[Mogibacteriaceae];?;?	5.03394	3.86833	4.90112	4.68149	0	0	0	3.25403	0	4.77097	0	4.02016	4.80573	4.83827	6.2073	4.85272	1.94972	5.5434	5.06445	5.55618	4.17461	5.3141	7.13506	4.5228	0	0	1.24434	2.33998	2.33167	2.72321	3.12927	2.76732	3.10006	0	4.0463	4.11996
OTU_203	OTU_203;Bacteria;Firmicutes;Clostridia;Clostridiales;?;?;?	0.859495	0.848202	0	0	0	0	0	0	0	0	0	0	0	0	0	0	0	9.19804	0	0	0	0	0	0	0.937883	0	0	0	0	2.0402	4.5999	0	0	1.24687	0	0
OTU_204	OTU_204;Bacteria;Bacteroidetes;Bacteroidia;Bacteroidales;S24-7;?;?	0	4.4467	0	0	0	0	0	0	0	0	0	0	7.20359	0	4.77196	0	7.18095	0	0	3.71358	0	0	0	4.81565	0	0	0	0	0.656514	0	0	0	8.00998	0	0	0
OTU_205	OTU_205;Bacteria;Firmicutes;Clostridia;Clostridiales;Ruminococcaceae;Oscillospira;?	4.62162	5.04484	1.82711	5.52458	0	0	2.53209	1.15059	1.9591	4.6959	1.38232	0	1.54909	3.78046	5.94817	4.74964	1.54036	5.07637	6.32176	1.14528	2.74118	1.50936	4.46895	5.40561	2.88948	0	1.24434	3.72125	3.18075	4.66001	5.31287	5.43691	4.01338	4.06975	4.68481	0
OTU_206	OTU_206;Bacteria;Bacteroidetes;Bacteroidia;Bacteroidales;S24-7;?;?	2.74434	0	0	0	0	0	0	0	1.9591	0	0	0	4.4718	3.53827	2.33612	2.31757	3.11014	2.57544	0	2.21278	3.33598	0	1.04074	0	3.34442	3.46021	3.40378	0	4.36409	1.16685	0.718811	8.66803	0	1.61348	0.655242	0
OTU_207	OTU_207;Bacteria;Firmicutes;Clostridia;Clostridiales;[Mogibacteriaceae];?;?	0.859495	3.78702	5.52416	2.66926	0	0	0	0	3.47361	4.61671	0	1.66677	0	2.39153	7.43547	2.80269	0	2.31279	0	2.54783	1.09575	0	0	5.8876	0	0	0	2.68196	2.33167	4.20421	6.69608	4.26716	5.5138	1.61348	4.89453	4.33894
OTU_208	OTU_208;Bacteria;Firmicutes;Clostridia;Clostridiales;Ruminococcaceae;Oscillospira;?	4.30241	2.3223	2.13674	5.2678	0	3.08596	0	0	3.80703	0	2.89288	3.278	4.03655	3.24706	6.2463	5.66709	4.10632	4.94314	4.35595	4.72518	4.98666	5.17353	4.77779	4.35057	5.94104	3.00075	3.20393	1.23531	2.87558	3.08257	5.16489	3.99421	4.31733	0.754146	4.14335	2.39916
OTU_209	OTU_209;Bacteria;Bacteroidetes;Bacteroidia;Bacteroidales;Bacteroidaceae;Bacteroides;acidifaciens	2.34256	4.77655	5.97745	0	0	2.24658	2.88338	2.82786	5.46997	5.45664	0	1.66677	6.66062	3.78046	4.66087	4.63863	3.11014	0	0	2.54783	6.95212	3.47996	2.38657	0	3.34442	3.90769	1.24434	4.41378	0	1.8034	0	1.80295	0	6.46274	0	0
OTU_210	OTU_210;Bacteria;Tenericutes;RF3;ML615J-28;?;?;?	3.05825	4.01836	3.11183	3.41276	0	1.16898	3.94038	0	0	3.59393	5.75561	2.41955	1.54909	4.16901	3.71681	0	0	4.51263	6.28219	0	0	0	0	4.88043	0	1.00043	5.19364	4.2177	0	1.16685	6.10458	6.54079	3.33478	4.00952	4.83765	0
OTU_211	OTU_211;Bacteria;Bacteroidetes;Bacteroidia;Bacteroidales;S24-7;?;?	4.62162	0	0	0	0	0	0	0	3.2727	0	0	0	5.924	6.06244	5.44358	4.85272	5.36044	3.98929	0	3.57374	2.47222	0	2.38657	2.28694	5.548	6.19066	4.51763	3.3896	5.95616	2.0402	0	6.36313	1.71033	0.754146	1.10418	0
OTU_212	OTU_212;Bacteria;Firmicutes;Clostridia;Clostridiales;Lachnospiraceae;?;?	4.47083	5.0794	0.887072	5.34595	3.5931	1.16898	3.60441	5.98236	0	4.91032	4.09329	0	4.70277	0	0	4.74964	0	0.994296	1.05802	0	0	0.943674	2.06069	0	0.937883	0	2.35257	2.68196	5.69242	3.37003	5.7188	5.38055	3.53659	2.14834	3.57564	4.73605
OTU_213	OTU_213;Bacteria;Firmicutes;Clostridia;Clostridiales;Lachnospiraceae;Dorea;?	0	0	0	0	0	0	0	0	0	1.91407	0	0	0	0	0	0	0	0	0	0	0	0	0	0	0	0	0	0	0	0	0	0	0	0	0	8.61004
OTU_214	OTU_214;Bacteria;Firmicutes;Clostridia;Clostridiales;Ruminococcaceae;Oscillospira;?	4.47083	2.3223	3.86698	1.65279	1.59089	0	3.40165	1.78244	0	3.21818	3.4116	5.47575	0	2.88181	3.18569	3.45448	2.52899	1.99144	3.42473	3.04812	3.33598	5.01776	1.63903	4.81565	3.34442	3.58574	4.12344	2.68196	4.44266	4.91945	4.94054	5.32191	3.94407	4.64571	4.97584	3.78919
OTU_215	OTU_215;Bacteria;Firmicutes;Clostridia;Clostridiales;Ruminococcaceae;?;?	2.90982	4.7338	4.36013	4.48826	1.00445	5.44128	2.31809	4.6668	3.64993	4.1385	2.89288	3.278	4.99191	1.6432	3.47555	6.22344	1.54036	3.89623	4.35595	3.04812	1.71126	5.47251	3.98203	2.90053	2.88948	2.32261	2.35257	4.2177	3.77378	4.25213	4.39373	4.06744	3.10006	3.88095	4.23429	2.74415
OTU_216	OTU_216;Bacteria;Firmicutes;Bacilli;Bacillales;Staphylococcaceae;Staphylococcus;aureus	2.74434	4.15424	5.16294	4.61991	0	1.80614	0	1.78244	1.2893	4.84232	0	2.41955	3.85641	5.36974	2.82256	6.81478	5.02206	5.87141	4.01337	5.31399	4.87926	2.70941	5.60222	4.74782	2.22122	2.32261	0	5.37953	0	1.8034	0	0	3.33478	2.14834	0	4.69695
OTU_217	OTU_217;Bacteria;Firmicutes;Erysipelotrichi;Erysipelotrichales;Erysipelotrichaceae;Allobaculum;?	0	0	0	0	0	0	0	0	0	0	0	2.9117	0	0	0	0	1.54036	0	0	0	0	0	0	0	0	0	0	0	8.24575	0	0	0	0	0	0	0
OTU_218	OTU_218;Bacteria;Firmicutes;Clostridia;Clostridiales;Clostridiaceae;?;?	2.34256	4.21767	4.67994	0	0	0	0	0	3.80703	4.61671	0	2.41955	2.27877	5.03798	1.5968	4.08234	0	1.57735	4.43024	4.72518	1.71126	3.47996	3.07056	4.35057	0	0	0	1.89089	5.85924	5.98323	4.09977	3.55913	5.22334	0.754146	2.48518	4.43711
OTU_219	OTU_219;Bacteria;Firmicutes;Clostridia;Clostridiales;?;?;?	5.63993	2.72286	4.23556	5.7711	0	0	0	1.15059	4.50216	1.25359	1.38232	0	0	5.03798	0	4.08234	1.94972	1.99144	6.81318	4.51185	5.0375	0	0	0	0.937883	0	6.75208	0	0	5.39547	1.55458	0	2.81959	3.88095	0.655242	0.776097
OTU_220	OTU_220;Bacteria;Firmicutes;Clostridia;Clostridiales;?;?;?	0	0	0	4.74054	0	0	0	0	1.2893	0	0	5.73337	1.54909	8.82439	0	0	0	3.89623	0	0	6.79847	4.34992	0	0	4.12787	0	0	0	0	0	4.97057	0	0	5.14289	0	0
OTU_221	OTU_221;Bacteria;Firmicutes;Bacilli;Bacillales;Planococcaceae;Sporosarcina;?	0	0	5.62693	1.05117	0	0	0	0	4.59129	3.89176	0	5.90028	5.7797	4.33	6.32128	5.42094	2.74975	0	5.06445	3.24538	0	7.12426	4.72109	0	0	0	3.57928	2.33998	0	4.94883	0	3.65728	0	2.14834	0	0
OTU_222	OTU_222;Bacteria;Firmicutes;Clostridia;Clostridiales;Peptostreptococcaceae;?;?	2.34256	4.0879	4.4186	4.18231	6.75026	2.58354	3.69601	2.82786	4.82973	5.41042	1.38232	0	3.12189	0	3.47555	0	0	0	2.41367	2.21278	6.04051	0	4.07547	3.66	0	3.58574	1.90235	1.23531	1.72468	2.72321	3.32791	2.11073	2.65585	1.90556	2.62619	5.96056
OTU_223	OTU_223;Bacteria;Firmicutes;Clostridia;Clostridiales;Ruminococcaceae;?;?	0	0	3.48453	0	0	0	0	0	0	0	0	6.0017	0	0	7.05101	2.80269	2.26824	0	5.81212	0	0	0	0	0	0	0	0	2.33998	5.34917	3.81503	0	7.49371	3.22219	2.6989	0	0
OTU_224	OTU_224;Bacteria;Firmicutes;Clostridia;Clostridiales;Ruminococcaceae;?;?	1.78375	2.3223	4.4186	0	0	0	0	0	5.97947	2.70872	0	4.76024	0	3.24706	3.71681	3.69541	0	2.31279	3.42473	1.77559	0	0	7.91291	1.8427	0.937883	0	1.24434	0	4.40391	5.00585	1.19639	0	3.53659	1.90556	4.2777	0
OTU_225	OTU_225;Bacteria;Firmicutes;Clostridia;Clostridiales;?;?;?	3.72422	1.76586	0	0	0	0	0	0	0	1.91407	0	0	0	7.43471	0	0	0	6.61804	3.27151	0	0	1.50936	0	0	0	1.00043	0	0	2.62911	2.0402	5.38153	7.33964	0	0.754146	2.48518	0
OTU_226	OTU_226;Bacteria;Firmicutes;Clostridia;Clostridiales;Lachnospiraceae;?;?	0	0	0	0	0	0	0	0	5.87685	0	0	0	2.76106	5.75727	7.81854	2.80269	0	7.03305	0	2.81956	1.71126	0	0	0	0	1.58553	0	0	0	0	0	0	0	0	6.20964	3.14362
OTU_227	OTU_227;Bacteria;Firmicutes;Clostridia;Clostridiales;Ruminococcaceae;Oscillospira;?	0	0.848202	1.43234	0	0	0	0	0	4.30547	0	0	6.52906	0	3.53827	3.18569	4.08234	2.26824	7.9544	4.1948	4.4331	2.9678	4.64437	4.46895	3.32967	0.937883	0	0	0	2.98463	0.69831	0.718811	0	3.33478	1.24687	0	2.58194
OTU_228	OTU_228;Bacteria;Firmicutes;Clostridia;Clostridiales;Ruminococcaceae;?;?	4.30241	3.78702	2.60798	4.41764	3.70864	2.24658	0.845868	6.7434	4.07767	3.75051	2.89288	0	5.23266	1.6432	5.90007	4.38713	3.39826	3.68989	4.35595	1.77559	3.75591	2.48983	3.53267	3.131	2.69917	1.00043	1.90235	4.31907	3.18075	1.8034	4.25422	4.64751	1.71033	2.6989	3.35023	2.58194
OTU_229	OTU_229;Bacteria;Firmicutes;Clostridia;Clostridiales;Lachnospiraceae;?;?	0	0.848202	2.79617	0	0	0	0	0	4.50216	0	3.61449	4.02016	1.54909	0	0	4.85272	0.966677	0	0	3.41888	0	5.09774	6.43696	2.62612	0	2.00064	0	0	6.80276	4.54928	0.718811	2.93323	2.96663	0	1.95397	3.54688
OTU_230	OTU_230;Bacteria;Firmicutes;Clostridia;Clostridiales;Ruminococcaceae;Oscillospira;?	0	2.07074	3.48453	2.66926	1.00445	1.16898	0	1.78244	5.94607	0	2.54118	2.9117	1.54909	0	5.44358	7.46219	4.97905	0	2.41367	4.91099	2.14134	3.2189	4.24594	5.8876	3.05758	3.46021	4.60139	2.95821	0.656514	3.87747	1.55458	3.34021	3.33478	2.97569	3.26652	3.54688
OTU_231	OTU_231;Bacteria;Bacteroidetes;Bacteroidia;Bacteroidales;Rikenellaceae;AF12;?	0	0	0.887072	0	0	1.16898	0	0	0	0	1.38232	0	0	1.6432	0	0	0	0	0	0	0	0.943674	0	0	0	0	0	0	3.18075	3.28043	3.12927	8.17044	3.87127	2.53765	2.98159	3.71285
OTU_232	OTU_232;Bacteria;Tenericutes;Mollicutes;RF39;?;?;?	4.1117	5.38588	0.887072	0	1.00445	0	0	0	0	0	3.4116	0	7.1061	0	1.5968	4.08234	2.52899	1.99144	2.90543	0	4.87926	6.78088	0	0	3.05758	2.58567	2.6952	3.56493	0	3.87747	1.19639	3.45382	5.0362	2.35609	3.35023	1.6496
OTU_233	OTU_233;Bacteria;Firmicutes;Clostridia;Clostridiales;?;?;?	1.78375	4.0879	0	4.09449	0	0	0	1.15059	0	2.36543	1.38232	0	4.4718	0	0	0	0	0	2.08617	0	0	0	0	0	0.937883	1.00043	0	0	0.656514	0	4.39373	6.98066	4.26145	3.09642	6.56538	0
OTU_234	OTU_234;Bacteria;Tenericutes;RF3;ML615J-28;?;?;?	0	0	0	0	0	0	0	0	0	0	0	0	0	0	0	0	0	0	0	0	0	0	0	0	0	0	0	9.19824	0	0	0	0	0	0	0	0
OTU_235	OTU_235;Bacteria;Proteobacteria;Alphaproteobacteria;Caulobacterales;Caulobacteraceae;Brevundimonas;diminuta	0	0.848202	0	0	0	0	0	0	0	9.02273	0	0	0	1.6432	5.2267	4.24277	3.52327	0.994296	2.08617	0	1.71126	3.2189	2.06069	0	0	0	0	0	0	0	0	0	0	0	0	0
OTU_236	OTU_236;Bacteria;Firmicutes;Clostridia;Clostridiales;Peptostreptococcaceae;?;?	1.78375	4.21767	3.68839	3.90098	6.69529	2.85651	2.06674	1.78244	4.67523	4.91032	3.17543	0	2.27877	0	2.82256	0	0	0	3.42473	0	6.43117	1.91466	3.88212	0	1.50153	2.80809	2.6952	1.23531	0	2.42175	3.32791	2.57982	3.43921	2.35609	2.15357	5.1664
OTU_237	OTU_237;Bacteria;Firmicutes;Clostridia;Clostridiales;Ruminococcaceae;?;?	2.09004	0	0.887072	0	0	0	3.28848	0	1.2893	1.91407	0	4.20165	3.12189	1.6432	1.5968	2.31757	0	3.15977	3.68961	1.77559	0	2.70941	6.60307	2.62612	0	0	1.90235	1.89089	4.04957	5.21377	6.13141	4.59894	0.813487	1.90556	3.17765	3.9966
OTU_238	OTU_238;Bacteria;Verrucomicrobia;Verrucomicrobiae;Verrucomicrobiales;Verrucomicrobiaceae;Akkermansia;muciniphila	0.859495	0	2.13674	0	5.33059	6.09635	5.80779	6.03699	2.41475	1.25359	3.79234	0	2.76106	3.53827	2.33612	1.58133	4.63566	2.31279	1.05802	1.77559	3.48995	3.2189	2.65224	2.62612	4.20152	3.46021	5.13864	3.56493	4.14664	0.69831	2.28539	0	2.01071	2.6989	0.655242	2.58194
OTU_239	OTU_239;Bacteria;Bacteroidetes;Bacteroidia;Bacteroidales;S24-7;?;?	1.78375	1.76586	0.887072	0	0	1.16898	0	0	1.9591	2.36543	0	4.36284	0	0	2.82256	0	3.63831	3.31165	1.66181	1.77559	0	0	1.04074	0	4.05025	6.34069	5.99952	2.33998	2.48804	0	1.55458	5.29166	0.813487	1.24687	6.56538	0
OTU_240	OTU_240;Bacteria;Bacteroidetes;Bacteroidia;Bacteroidales;S24-7;?;?	0	0	0	0	0	0	0	0	0	0	0	0	0	0	0	0	0	0	0	0	0	0	0	0	0	0	0	0	1.44827	0	1.19639	8.3933	1.33051	0	0	0
OTU_241	OTU_241;Bacteria;Firmicutes;Erysipelotrichi;Erysipelotrichales;Erysipelotrichaceae;Coprobacillus;?	0	0	8.44817	0	0	0	0	0	0	0	0	0	0	0	0	0	0	0	0	0	0	0	0	0	0	0	0	0	0	0	0	0	0	0	0	0
OTU_242	OTU_242;Bacteria;Actinobacteria;Coriobacteriia;Coriobacteriales;Coriobacteriaceae;Adlercreutzia;?	3.42933	3.03603	3.78045	4.00098	0	2.58354	0	0	0	0	5.0504	5.54459	3.41028	4.47481	2.33612	4.51835	4.10632	2.57544	4.1948	0	2.9678	3.7999	4.24594	3.66	2.4799	3.70123	4.33396	1.89089	1.72468	0	2.28539	3.74917	4.07951	4.23668	4.51383	5.42751
OTU_243	OTU_243;Bacteria;Firmicutes;Clostridia;Clostridiales;Christensenellaceae;?;?	0	0	0	0	0	0	0	0	0	0	0	0	0	0	0	7.75613	0	0	0	0	0	0	0	7.20119	0	0	0	0	5.17602	6.30059	0	0	0	0	0	0
OTU_244	OTU_244;Bacteria;Firmicutes;Clostridia;Clostridiales;Ruminococcaceae;?;?	3.53446	3.17034	0	0	0	1.16898	0	0	0	0	1.38232	0	0	4.83827	4.87509	4.85272	1.94972	5.15881	0	4.51185	2.9678	0	5.47082	5.00188	2.4799	0	5.13864	6.01464	0	6.07935	0	4.64751	0	0	0	0
OTU_245	OTU_245;Bacteria;Tenericutes;Mollicutes;RF39;?;?;?	4.96037	1.76586	5.4699	0	0	0	5.35287	4.5211	0	0	0	3.278	0	4.83827	4.66087	6.06072	4.10632	6.17855	0	0	3.62905	1.50936	0	4.67664	1.50153	0	2.35257	5.78588	0	0	0	0	0	2.14834	3.26652	0
OTU_246	OTU_246;Bacteria;Firmicutes;Clostridia;Clostridiales;Ruminococcaceae;Oscillospira;?	5.26538	1.3788	0.887072	1.65279	0	0	0	0	3.94869	2.98582	3.17543	0	0	1.6432	8.76922	1.58133	0	0.994296	5.60321	1.14528	1.09575	0.943674	3.07056	3.80054	3.88125	0	0	3.56493	1.72468	2.97244	1.19639	2.57982	0	0	1.10418	1.94485
OTU_247	OTU_247;Bacteria;Cyanobacteria;4C0d-2;YS2;?;?;?	0	0	0	2.40294	0	0	0	0	3.47361	0	0	0	0	0	0	0	0	0	0	5.39932	0	0	0	4.60177	0	0	7.89394	4.2177	2.87558	0	0	0	0	0	6.38858	0
OTU_249	OTU_249;Bacteria;Firmicutes;Bacilli;Lactobacillales;Streptococcaceae;Streptococcus;infantis	4.84246	0	4.90112	0	0	0	0	0	5.56105	0	0	0	0	2.88181	1.5968	5.35224	3.63831	3.98929	3.10005	5.31399	4.17461	0	6.48883	3.80054	4.05025	2.80809	1.90235	6.26382	0	0	0	0	0	0	0	0
OTU_250	OTU_250;Bacteria;Firmicutes;Clostridia;Clostridiales;Ruminococcaceae;Ruminococcus;?	2.55739	0	3.24705	4.55559	0	0	0	3.42765	6.42964	0	3.61449	0	0	0	0	4.51835	0	2.31279	0	1.77559	0	0	0	1.19749	5.43038	0	0	0	0	3.28043	6.61285	3.65728	2.81959	0.754146	3.50435	0
OTU_251	OTU_251;Bacteria;Firmicutes;Clostridia;Clostridiales;?;?;?	1.78375	3.70087	2.60798	1.05117	0	1.16898	0	0	1.2893	0	1.38232	0	0	0	0	0	0	3.31165	2.41367	1.14528	0	0	0	0	0	0	0	8.22376	3.50752	4.25213	1.55458	3.21688	2.47112	2.35609	3.88724	3.14362
OTU_252	OTU_252;Bacteria;Firmicutes;Clostridia;Clostridiales;?;?;?	3.42933	2.53644	0.887072	5.74249	0	0	0	0	0	0	5.47202	0	2.27877	0	2.82256	0	4.02408	0	5.01703	2.21278	1.09575	0.943674	0	2.90053	3.58359	2.00064	2.35257	0	1.95656	0	5.359	6.57885	1.33051	1.24687	1.44607	0
OTU_253	OTU_253;Bacteria;Verrucomicrobia;Verrucomicrobiae;Verrucomicrobiales;Verrucomicrobiaceae;Akkermansia;muciniphila	0	2.3223	1.43234	2.66926	4.25634	3.75331	4.813	4.59579	1.2893	2.70872	4.34217	0	4.4718	0	1.5968	2.31757	3.52327	3.44904	2.08617	1.77559	2.47222	1.50936	2.65224	1.8427	4.4023	3.90769	4.82691	2.95821	4.75126	1.8034	3.12927	0.871666	3.10006	4.33812	1.72226	4.2336
OTU_254	OTU_254;Bacteria;Bacteroidetes;Bacteroidia;Bacteroidales;Prevotellaceae;Prevotella;?	0.859495	0.848202	0	2.07608	0	2.85651	0	0	0	2.36543	2.54118	3.278	6.25032	3.78046	3.47555	3.16508	2.94117	1.57735	0	1.14528	0	3.06822	3.77478	2.62612	0	3.00075	3.20393	0	4.48039	2.58034	6.59369	2.76732	1.71033	1.24687	3.70846	2.18981
OTU_255	OTU_255;Bacteria;Bacteroidetes;Bacteroidia;Bacteroidales;S24-7;?;?	0	0	0	0	0	0	0	0	0	0	0	0	0	0	0	0	0	0	0	0	0	0	0	0	0	0	0	0	2.7576	2.42175	1.84129	8.03094	2.47112	1.24687	1.72226	2.18981
OTU_256	OTU_256;Bacteria;Firmicutes;Clostridia;Clostridiales;Ruminococcaceae;?;?	0	0	0	0	0	0	0	0	0	0	0	0	0	0	0	0	0	0	0	0	0	0	0	0	0	0	0	0	0	0	0	0	0	0	0	7.95556
OTU_257	OTU_257;Bacteria;Firmicutes;Clostridia;Clostridiales;?;?;?	7.79248	0	4.9809	0	0	1.16898	0	0	0	0	0	0	0	0	0	0	0	0.994296	1.66181	0	0	0	0	0	3.05758	0	0	0	0	0	0	0	1.33051	4.06975	0	0
OTU_258	OTU_258;Bacteria;Firmicutes;Clostridia;Clostridiales;Ruminococcaceae;?;?	2.90982	3.78702	0	4.34338	0	0	0	1.78244	0	0	5.24634	0	0	2.88181	3.47555	5.72258	2.74975	0	4.91723	0	2.14134	5.7451	6.63412	0	0	0	5.13864	0	0	0	2.89884	0	0	0	2.32888	2.18981
OTU_259	OTU_259;Bacteria;Tenericutes;Mollicutes;RF39;?;?;?	4.62162	4.68974	2.60798	5.45576	0	0	4.59234	0	0	3.75051	4.55436	0	0	1.6432	0	4.51835	0	0	5.06445	2.21278	0	0	0	3.50427	3.34442	0	3.20393	1.89089	4.23759	0.69831	2.28539	4.06744	2.65585	0.754146	4.36078	0
OTU_260	OTU_260;Bacteria;Firmicutes;Clostridia;Clostridiales;Ruminococcaceae;Oscillospira;?	0	0	0	0	0	0	0	0	0	0	0	0	0	0	0	0	0	0	0	0	0	0	0	0	0	0	0	0	0.656514	0	0	8.0671	0	0	0.655242	0
OTU_261	OTU_261;Bacteria;Firmicutes;Clostridia;Clostridiales;Lachnospiraceae;Coprococcus;?	4.41684	4.15424	4.02587	3.55115	0	0	0	2.55586	1.2893	3.75051	0	4.63954	2.27877	3.53827	4.87509	3.90181	0.966677	0.994296	2.41367	2.21278	2.14134	3.47996	0	2.62612	1.50153	0	1.24434	0	2.48804	4.38704	2.62448	4.54868	3.10006	3.09642	5.24002	1.94485
OTU_262	OTU_262;Bacteria;Bacteroidetes;Bacteroidia;Bacteroidales;S24-7;?;?	0	0	0	0	0	6.24625	0.845868	0	0	0	0	2.9117	0	0	0	0	0	0	0	0	1.71126	0	1.04074	1.19749	0	0	0	2.68196	0	0	6.2946	4.32803	4.82112	5.57565	0	0
OTU_263	OTU_263;Bacteria;Firmicutes;Clostridia;Clostridiales;Ruminococcaceae;Ruminococcus;?	0	0	0	0	0	0	0	2.22037	0	0	0	0	0	0	0	0	0	0	0	0	0	0	0	1.19749	0	0	0	0	0	7.59067	0	0.871666	0	0	0	0
OTU_264	OTU_264;Bacteria;Bacteroidetes;Bacteroidia;Bacteroidales;S24-7;?;?	0	0	3.37067	0	0	0	0	0	0	0	0	0	0	4.47481	2.82256	4.24277	2.52899	0	4.86462	0	0	0	0	0	5.98342	7.34957	0	4.2177	0	0.69831	1.19639	0	0	0.754146	0	0
OTU_265	OTU_265;Bacteria;Firmicutes;Clostridia;Clostridiales;Ruminococcaceae;?;?	4.36076	2.88792	2.13674	3.08838	0	0	0	0	5.56105	1.25359	0	0	0	2.39153	3.92344	2.80269	3.39826	2.79756	2.41367	4.26141	3.62905	2.48983	1.04074	4.04621	4.20152	0	0	3.56493	0.656514	2.0402	1.19639	5.73541	4.01338	1.24687	1.95397	4.2336
OTU_266	OTU_266;Bacteria;Firmicutes;Clostridia;Clostridiales;Dehalobacteriaceae;Dehalobacterium;?	3.96894	3.78702	3.24705	3.90098	2.00667	1.80614	4.08295	4.07558	3.64993	3.21818	1.38232	2.9117	0	3.24706	2.33612	4.63863	2.52899	3.31165	4.1948	3.84105	3.33598	4.13927	4.32417	3.131	3.68978	0	3.20393	5.12341	0	2.42175	2.89884	2.36426	1.33051	1.61348	0	0
OTU_267	OTU_267;Bacteria;Firmicutes;Clostridia;Clostridiales;Clostridiaceae;Clostridium;perfringens	0	4.21767	1.43234	0	1.00445	1.80614	0	0	4.59129	5.26219	0	0	0	0	0	0	0	0	0	0	6.45006	0	0	2.28694	0	3.58574	0	0	0	0	2.08036	3.83556	4.52144	5.05622	1.44607	4.57287
OTU_268	OTU_268;Bacteria;Firmicutes;Clostridia;Clostridiales;Ruminococcaceae;?;?	2.34256	0.848202	3.11183	2.89399	1.59089	0	0.845868	2.82786	1.9591	0	2.07511	3.278	0	2.88181	0	4.08234	3.39826	0	1.66181	1.77559	0	2.48983	0	3.32967	4.68506	5.7822	1.90235	1.89089	0.656514	3.37003	3.01865	2.36426	4.14274	4.06975	4.40059	3.71285
OTU_269	OTU_269;Bacteria;Bacteroidetes;Bacteroidia;Bacteroidales;Rikenellaceae;?;?	2.74434	4.39276	4.16899	4.34338	0	3.28387	0	0	2.76051	0	0	3.56987	4.70277	2.88181	2.33612	4.38713	3.11014	4.38143	0	3.41888	3.48995	0	2.06069	1.19749	3.88125	4.75571	4.68054	5.06624	3.35337	2.72321	0	2.57982	0	0	0	0
OTU_270	OTU_270;Bacteria;Bacteroidetes;Bacteroidia;Bacteroidales;S24-7;?;?	3.63246	0	1.43234	0	0	0	0	0	0	0	0	0	0	0	3.71681	1.58133	5.10441	4.31107	1.66181	0	0	0	1.04074	0	3.68978	6.04523	6.57695	3.99072	1.10604	0.69831	0	4.86851	0	0	0	0
OTU_271	OTU_271;Bacteria;Bacteroidetes;Bacteroidia;Bacteroidales;Rikenellaceae;?;?	0	0	0	0	0	0	0	0	0	0	8.52738	0	0	0	0	0	0	0	0	0	0	0	0	0	0	0	0	0	1.95656	0.69831	0	4.82693	0	0.754146	1.44607	1.27797
OTU_272	OTU_272;Bacteria;Firmicutes;Clostridia;Clostridiales;Lachnospiraceae;?;?	2.09004	0.848202	0.887072	2.40294	0	0	0	0	0	3.21818	0	0	3.65052	6.65547	2.82256	0	2.74975	3.15977	1.66181	1.14528	0	3.06822	0	0	3.34442	0	1.24434	0	0	1.51995	3.32791	4.78413	1.33051	1.61348	5.89815	0.776097
OTU_273	OTU_273;Bacteria;Firmicutes;Clostridia;Clostridiales;Lachnospiraceae;Coprococcus;?	2.09004	2.3223	2.60798	0	5.09608	0	0	0	4.19606	4.34914	0	5.32734	2.76106	0	1.5968	4.51835	0.966677	0.994296	3.91331	2.81956	1.09575	3.97954	1.63903	3.32967	0	0	0	2.33998	4.51717	3.81503	0	1.41118	0	1.24687	1.72226	4.91706
OTU_274	OTU_274;Bacteria;Bacteroidetes;Bacteroidia;Bacteroidales;S24-7;?;?	0	0	0	3.08838	1.00445	0	3.03142	0	0	0	0	0	3.65052	0	0	0	0	0	0	0	0	0	0	0	0	0	0	0	3.94549	1.8034	6.61285	2.11073	3.10006	2.14834	4.6522	0
OTU_275	OTU_275;Bacteria;Firmicutes;Clostridia;Clostridiales;Ruminococcaceae;Ruminococcus;?	0	0	0	0	0	0	0	0	0	0	0	0	0	0	0	0	0	0	7.59699	0	0	6.29586	0	0	0	0	0	0	0	0	0	0	0	0	0	0
OTU_276	OTU_276;Bacteria;Firmicutes;Clostridia;Clostridiales;Peptococcaceae;?;?	0	0	0	0	0	0	0	0	0	0	0	0	0	0	0	0	0	0	0	0	0	0	0	0	0	0	0	0	0	0	0	7.77084	0	0	0	0
OTU_277	OTU_277;Bacteria;Bacteroidetes;Bacteroidia;Bacteroidales;?;?;?	0	0	0	0	0	0	0	0	0	0	1.38232	0	0	0	0	0	0	0	0	0	0	0	0	0	0	0	0	0	4.84101	3.60962	3.58244	6.59132	4.52144	3.09642	2.87257	3.02235
OTU_278	OTU_278;Bacteria;Firmicutes;Clostridia;Clostridiales;Ruminococcaceae;?;?	2.09004	0	0.887072	1.05117	2.59237	0	4.08295	0	3.47361	2.70872	2.54118	0	5.67481	0	1.5968	1.58133	0	3.15977	2.90543	1.77559	1.09575	3.59467	3.88212	0	0	2.58567	0	0	4.09892	0	5.73639	0	2.2592	0	0	3.9966
OTU_279	OTU_279;Bacteria;Firmicutes;Clostridia;Clostridiales;Ruminococcaceae;?;?	0	0	0	0	0	0	0	0	0	0	0	0	0	0	0	0	5.2918	6.13848	0	0	0	0	0	6.6337	0	0	0	6.51947	0	0	0	0	0	0	0	0
OTU_280	OTU_280;Bacteria;Firmicutes;Bacilli;Bacillales;Planococcaceae;Solibacillus;?	2.74434	2.72286	0	4.68149	5.40099	0	0.845868	0	1.2893	4.0204	0	4.20165	5.67481	0	0	1.58133	3.63831	3.68989	0	4.4331	5.5737	2.48983	1.04074	0	1.50153	3.70123	0	4.66549	0	0	0	0	0	0	0	0
OTU_281	OTU_281;Bacteria;Cyanobacteria;4C0d-2;YS2;?;?;?	3.05825	5.72837	4.02587	0	0	0	0	0	0	0	0	4.36284	0	5.21338	2.82256	2.31757	2.94117	0	0	0	2.14134	0	0	4.94243	2.22122	0	4.12344	4.50265	0	0	0	5.38055	0	0	2.32888	0
OTU_282	OTU_282;Bacteria;Firmicutes;Clostridia;Clostridiales;?;?;?	0	0	1.82711	1.05117	0	0	3.50659	0	0	0	6.19593	3.81251	0	2.88181	4.26472	1.58133	0	3.98929	0	1.14528	1.09575	6.50099	1.63903	2.28694	3.58359	0	0	3.56493	0	0	0	3.91707	1.71033	0.754146	0	0
OTU_283	OTU_283;Bacteria;Firmicutes;Clostridia;Clostridiales;Ruminococcaceae;Ruminococcus;?	0.859495	2.07074	1.43234	2.40294	0	0	0	0	1.9591	0	0	4.20165	0	1.6432	2.82256	5.03911	1.54036	3.57449	5.60321	1.14528	2.14134	1.91466	4.60052	2.90053	0	0	0	2.68196	0.656514	5.30748	3.79873	1.41118	2.2592	1.24687	2.98159	0.776097
OTU_284	OTU_284;Bacteria;Firmicutes;Clostridia;Clostridiales;Ruminococcaceae;?;?	2.34256	3.40641	2.96261	3.08838	0	0	0	0	3.03922	1.25359	1.38232	1.66677	1.54909	2.39153	6.16722	2.31757	2.74975	3.79674	3.42473	1.77559	1.09575	0	2.06069	3.32967	1.50153	0	0	2.68196	1.44827	3.60962	2.46487	5.77966	1.33051	2.53765	2.48518	0
OTU_285	OTU_285;Bacteria;Firmicutes;Clostridia;Clostridiales;?;?;?	0	0	0	0	0	0	0	0	0	0	0	2.41955	0	0	0	0	0	0	0	0	0	0.943674	0	0	0	0	0	0	0	0	0	7.59625	0	0	0	0
OTU_286	OTU_286;Bacteria;Firmicutes;Clostridia;Clostridiales;?;?;?	0	0	0	0	0	0	0	0	0	0	0	0	0	0	0	0	0	0	0	0	0	1.50936	0	0	3.05758	0	7.77273	0	0	4.34346	0	0	4.70022	0	0	0
OTU_287	OTU_287;Bacteria;Tenericutes;Mollicutes;RF39;?;?;?	4.1117	1.3788	3.78045	0	0	0	0	0	0	4.0204	1.38232	2.41955	0	0	2.82256	2.80269	4.32817	0	2.41367	3.71358	3.87252	0.943674	0	3.131	1.50153	0	4.33396	0	4.75126	2.42175	3.12927	2.76732	1.33051	3.88095	2.62619	0
OTU_288	OTU_288;Bacteria;Firmicutes;Clostridia;Clostridiales;Ruminococcaceae;?;?	2.34256	0.848202	0	0	1.00445	0	6.44482	0	0	0	2.07511	0	0	2.88181	0	0	0	0	0	0	0	3.06822	1.04074	3.66	0	4.58578	0	2.68196	1.44827	0	1.55458	2.57982	4.37113	2.84392	0	3.45613
OTU_289	OTU_289;Bacteria;Firmicutes;Clostridia;Clostridiales;Lachnospiraceae;?;?	2.34256	3.40641	1.43234	3.55115	0	0	0.845868	5.27878	2.76051	2.70872	0	1.66677	2.27877	1.6432	4.26472	2.80269	0	2.31279	3.80579	0	0	2.70941	5.12239	2.90053	2.88948	0	2.6952	0	3.64678	3.28043	3.23201	2.76732	0.813487	1.24687	2.32888	2.18981
OTU_290	OTU_290;Bacteria;Firmicutes;Clostridia;Clostridiales;Ruminococcaceae;?;?	0	0	0	0	0	1.16898	0	0	0	0	0	0	0	5.5108	1.5968	0	1.94972	0	0	0	0	0	0	1.19749	2.88948	0	0	0	0	1.16685	0	6.10939	3.87127	0.754146	5.63995	0
OTU_291	OTU_291;Bacteria;Actinobacteria;Actinobacteria;Actinomycetales;Micrococcaceae;Arthrobacter;?	0	0	0	0	0	0	0	0	0	7.63635	1.38232	2.9117	1.54909	4.94158	4.77196	1.58133	4.45913	0	2.41367	0	0	1.50936	3.98203	0	0.937883	0	1.24434	0	0.656514	0	0	0	0	0	0	0.776097
OTU_292	OTU_292;Bacteria;Firmicutes;Clostridia;Clostridiales;Lachnospiraceae;?;?	0	0	0	2.07608	0	0	0	0	0	0	0	0	0	4.33	1.5968	0	0	7.32849	0	0	0	0	0	0	0	0	0	3.72125	0	0	3.01865	0	3.22219	2.53765	0.655242	1.27797
OTU_293	OTU_293;Bacteria;TM7;TM7-3;CW040;F16;?;?	0	0	0.887072	0	0	4.76654	0.845868	0	0	0	2.07511	0	0	4.72699	0	0	0	0	3.27151	0	0	3.59467	0	0	0.937883	0	2.97187	0	3.77378	1.8034	3.23201	5.77966	3.79459	3.09642	2.62619	2.88994
OTU_294	OTU_294;Bacteria;Firmicutes;Clostridia;Clostridiales;Ruminococcaceae;Oscillospira;?	3.96894	3.40641	3.24705	2.40294	0	0	2.06674	0	3.03922	2.98582	0	0	1.54909	5.442	4.4092	2.80269	0	3.15977	4.56824	4.06648	2.14134	0.943674	2.65224	0	0	0	1.24434	3.3896	1.72468	2.24355	0.718811	4.44257	0.813487	2.53765	2.75463	0.776097
OTU_295	OTU_295;Bacteria;Firmicutes;Clostridia;Clostridiales;Ruminococcaceae;Oscillospira;?	2.34256	2.3223	0.887072	1.65279	0	0	0	0	2.76051	3.21818	0	2.41955	0	0	2.82256	0	0.966677	0.994296	3.10005	0	1.71126	3.47996	6.12357	1.19749	1.90579	0	1.90235	6.04455	2.48804	2.42175	0.718811	2.11073	3.22219	0	1.10418	0
OTU_296	OTU_296;Bacteria;Firmicutes;Clostridia;Clostridiales;Ruminococcaceae;?;?	3.05825	3.40641	2.13674	0	2.32904	0	0.845868	0	0	3.59393	0	4.02016	3.41028	2.88181	0	0	1.54036	0.994296	2.41367	0	2.14134	2.89994	5.69348	2.62612	0	0	0	0	3.64678	0	0	0	3.33478	0	0	4.98355
OTU_297	OTU_297;Bacteria;Firmicutes;Clostridia;Clostridiales;Christensenellaceae;?;?	2.90982	3.2932	0	1.65279	0	0	0	2.55586	0	3.41825	0	4.63954	3.85641	0	0	0	0	0	0	0	0	3.7999	0	0	0	0	0	0	3.35337	4.79555	0.718811	4.6945	2.2592	0	1.44607	4.61543
OTU_298	OTU_298;Bacteria;Firmicutes;Clostridia;Clostridiales;Ruminococcaceae;?;?	0.859495	0.848202	1.82711	2.89399	1.00445	1.16898	2.31809	0	1.9591	1.91407	2.07511	3.56987	2.27877	0	1.5968	5.03911	0.966677	1.57735	1.05802	0	0	4.21296	1.63903	3.32967	2.4799	2.58567	3.40378	0	2.48804	3.81503	3.12927	2.76732	3.22219	3.20783	1.10418	4.2336
OTU_299	OTU_299;Bacteria;Firmicutes;Clostridia;Clostridiales;Clostridiaceae;?;?	0	0	0	0	0	0	0	0	0	0	0	0	8.51964	0	0	2.31757	0	0	0	0	0	0	0	0	0	0	0	0	0	0	0	0	0	0	0	0
OTU_300	OTU_300;Bacteria;Verrucomicrobia;Verrucomicrobiae;Verrucomicrobiales;Verrucomicrobiaceae;Akkermansia;muciniphila	0	2.3223	0.887072	2.07608	4.00833	3.45788	3.03142	2.82786	1.2893	0	2.54118	0	1.54909	2.88181	0	2.31757	0.966677	2.31279	1.66181	1.14528	1.71126	0	0	1.19749	2.69917	3.58574	2.97187	1.89089	3.99847	2.58034	3.50248	0.871666	3.62782	4.12757	0.655242	2.39916
OTU_301	OTU_301;Bacteria;Firmicutes;Clostridia;Clostridiales;Ruminococcaceae;Oscillospira;?	0.859495	0	0	2.89399	0	0	0	0	1.2893	0	1.38232	0	0	5.442	1.5968	0	4.79293	4.98893	2.08617	0	0	0	0	0	0.937883	0	3.40378	2.33998	0	0	1.55458	0	0	5.82317	0	0
OTU_302	OTU_302;Bacteria;Bacteroidetes;Bacteroidia;Bacteroidales;S24-7;?;?	1.39441	0	0	0	0	3.28387	0	0	0	1.25359	2.07511	0	0	0	0	4.38713	0	2.57544	0	0	0	2.70941	2.06069	0	1.90579	0	3.73573	1.23531	0	0	3.41784	2.93323	3.10006	5.08569	5.05282	0
OTU_303	OTU_303;Bacteria;Bacteroidetes;Bacteroidia;Bacteroidales;Bacteroidaceae;Bacteroides;?	1.39441	0	1.43234	0	3.8156	0	1.37556	0	2.76051	3.41825	3.79234	0	3.41028	0	0	3.45448	0.966677	1.57735	0	1.14528	0	3.06822	3.07056	0	0.937883	2.00064	1.90235	3.99072	1.44827	2.42175	2.62448	1.41118	2.2592	3.49819	1.44607	5.37893
OTU_304	OTU_304;Bacteria;Firmicutes;Erysipelotrichi;Erysipelotrichales;?;?;?	0	1.3788	3.37067	3.67742	0	0	1.76215	0	0	0	2.07511	0	0	0	3.92344	4.85272	2.94117	3.31165	0	0	0	0.943674	2.06069	2.90053	4.12787	4.95502	4.51763	0	2.15627	0.69831	4.25422	0	0	0	2.75463	0
OTU_306	OTU_306;Bacteria;Firmicutes;Clostridia;Clostridiales;Ruminococcaceae;?;?	0	0.848202	2.13674	4.85186	0	0	0	0	0	3.41825	0	0	0	2.39153	5.63207	0	0	0	0	0	0	2.23072	2.06069	0	0	0	1.90235	0	0	0	5.75376	2.93323	1.71033	0	1.95397	1.6496
OTU_307	OTU_307;Bacteria;Firmicutes;Clostridia;Clostridiales;Ruminococcaceae;Ruminococcus;?	0	0	0	0	0	0	0	0	0	0	0	0	0	3.24706	0	0	5.51897	0	2.6804	0	0	0	2.65224	4.88043	0	0	1.24434	0	4.86973	0	0	0	5.00251	0	0	0
OTU_308	OTU_308;Bacteria;Firmicutes;Clostridia;Clostridiales;Ruminococcaceae;?;?	3.42933	4.7338	0.887072	3.55115	0	0	0	0	3.03922	0	0	0	0	1.6432	4.26472	4.38713	1.54036	2.31279	4.43024	2.21278	4.49873	3.35533	4.39838	0	1.50153	0	0	3.72125	0	0	0	1.41118	0	0	0.655242	1.6496
OTU_309	OTU_309;Bacteria;Firmicutes;Clostridia;Clostridiales;Ruminococcaceae;?;?	3.81049	3.60923	4.67994	1.05117	0	0	0	0	0	4.97525	0	0	0	2.39153	0	1.58133	1.54036	0	0	1.14528	1.71126	3.47996	3.39445	1.19749	0	0	0	1.89089	2.48804	3.68139	3.32791	3.34021	0	0	0.655242	1.94485
OTU_310	OTU_310;Bacteria;Firmicutes;Clostridia;Clostridiales;Lachnospiraceae;Coprococcus;?	0	0	1.43234	2.89399	2.00667	0	0.845868	1.15059	0	0	1.38232	2.41955	0	2.39153	2.82256	2.80269	0.966677	1.99144	1.05802	1.14528	0	2.23072	0	4.43925	2.69917	2.32261	1.24434	0	1.95656	3.60962	3.12927	3.83556	4.26145	3.88095	2.32888	2.18981
OTU_311	OTU_311;Bacteria;Bacteroidetes;Bacteroidia;Bacteroidales;[Odoribacteraceae];Odoribacter;?	0	0	0	0	0	0	0	0	0	0	0	0	0	0	0	0	0	0	0	0	0	0	0	0	0	0	0	0	4.48039	4.58714	3.92677	4.06744	3.62782	2.53765	3.64358	3.14362
OTU_312	OTU_312;Bacteria;Firmicutes;Clostridia;Clostridiales;Lachnospiraceae;?;?	2.09004	3.70087	2.13674	3.25967	2.59237	1.16898	1.76215	2.22037	1.2893	1.91407	0	0	0	0	3.92344	2.31757	2.26824	2.57544	4.1948	1.14528	1.09575	0	2.06069	1.19749	2.4799	3.00075	2.35257	2.95821	0.656514	2.0402	1.55458	2.11073	4.01338	2.14834	3.77055	0
OTU_313	OTU_313;Bacteria;Bacteroidetes;Bacteroidia;Bacteroidales;S24-7;?;?	0	0	1.82711	2.07608	2.59237	2.85651	2.31809	0	3.80703	0	0	0	4.19667	2.88181	3.18569	0	0	3.31165	3.80579	4.06648	0	4.41381	1.63903	0	2.69917	0	2.6952	4.41378	3.4325	0	2.89884	0	2.47112	0	0	1.94485
OTU_314	OTU_314;Bacteria;Firmicutes;Clostridia;Clostridiales;Ruminococcaceae;Oscillospira;?	2.55739	3.2932	3.68839	3.25967	0	0	0	0	1.2893	2.36543	1.38232	0	2.76106	0	6.03982	2.80269	0.966677	0	4.35595	1.77559	0	2.70941	0	0	0	0	0	0	1.10604	0	2.76817	4.38644	0	3.66366	1.44607	1.27797
OTU_315	OTU_315;Bacteria;Firmicutes;Clostridia;Clostridiales;?;?;?	0	3.78702	1.43234	3.08838	1.00445	2.58354	0	1.15059	2.41475	1.25359	2.07511	0	1.54909	0	2.33612	0	2.94117	1.57735	0	0	1.71126	0.943674	0	2.90053	4.4023	4.90771	0	0	1.95656	0	2.89884	0	3.10006	2.14834	3.94223	1.27797
OTU_316	OTU_316;Bacteria;Firmicutes;Clostridia;Clostridiales;?;?;?	2.09004	4.33672	1.82711	2.07608	0	0	0	0	0	2.70872	0	0	0	0	4.26472	1.58133	0	2.57544	2.90543	1.77559	0	0	1.63903	0	0.937883	0	1.24434	0	2.48804	1.16685	0.718811	0.871666	5.1328	2.14834	4.31984	0.776097
OTU_317	OTU_317;Bacteria;Firmicutes;Clostridia;Clostridiales;Ruminococcaceae;?;?	0	0	0	4.41764	0	0	0	0	0	0	1.38232	0	0	0	0	1.58133	0	0	0	0	0	0	0	1.19749	0	0	0	0	0	0	6.49384	0	0	0.754146	0	0
OTU_318	OTU_318;Bacteria;Bacteroidetes;Bacteroidia;Bacteroidales;S24-7;?;?	0	0	0	0	0	0	0	0	0	0	0	0	0	0	0	0	0	0	0	0	0	0	0	0	0	0	0	0	2.48804	3.9948	3.98677	3.34021	4.07951	4.56431	3.77055	3.54688
OTU_319	OTU_319;Bacteria;Firmicutes;Clostridia;Clostridiales;Ruminococcaceae;?;?	0.859495	0	2.79617	0	0	0	2.53209	2.55586	0	1.25359	2.54118	2.9117	0	2.39153	3.18569	1.58133	2.26824	1.99144	1.66181	2.81956	2.14134	2.23072	0	4.04621	3.05758	3.32269	2.35257	0	0	2.72321	3.12927	1.80295	3.62782	3.49819	2.62619	2.88994
OTU_320	OTU_320;Bacteria;Firmicutes;Clostridia;Clostridiales;Lachnospiraceae;?;?	2.90982	0.848202	1.43234	3.08838	0	2.58354	0.845868	4.86101	2.76051	1.25359	1.38232	2.9117	1.54909	2.39153	4.10415	0	0	1.99144	3.68961	1.14528	1.71126	3.2189	1.04074	2.28694	2.4799	3.17068	1.90235	1.23531	3.18075	2.42175	2.46487	2.93323	2.01071	0.754146	1.44607	0.776097
OTU_321	OTU_321;Bacteria;Firmicutes;Clostridia;Clostridiales;Lachnospiraceae;[Ruminococcus];gnavus	3.19283	4.49869	0	5.09754	0	0	0	0	4.75455	0	2.07511	0	0	0	0	0	0	0	0	3.04812	0	0	0	1.8427	0	2.00064	2.6952	1.23531	4.32315	0	0	3.83556	0	0	0	0
OTU_322	OTU_322;Bacteria;Bacteroidetes;Bacteroidia;Bacteroidales;S24-7;?;?	0	2.53644	0	0	0	0	0	0	0	0	0	0	5.15679	0	3.71681	0	4.02408	0	0	0	0	0	0	4.60177	0	0	0	0	0	0	0	0	6.08014	0	0	0
OTU_323	OTU_323;Bacteria;Firmicutes;Clostridia;Clostridiales;Clostridiaceae;?;?	2.34256	0	2.60798	0	0	0	0	0	1.2893	2.36543	0	0	0	0	0	3.16508	0.966677	1.99144	0	1.14528	2.47222	3.59467	2.65224	1.8427	0	0	0	0	3.26964	2.24355	3.32791	4.82693	1.33051	1.61348	4.18954	0.776097
OTU_324	OTU_324;Bacteria;Firmicutes;Clostridia;Clostridiales;Ruminococcaceae;Oscillospira;?	3.05825	4.54888	0	3.25967	2.32904	0	0	0	0	1.25359	1.38232	0	0	0	2.82256	4.38713	2.26824	1.57735	3.68961	1.14528	1.09575	4.13927	3.24158	2.62612	1.90579	0	3.87687	1.23531	0	2.0402	2.62448	0	1.33051	0.754146	2.32888	0.776097
OTU_325	OTU_325;Bacteria;Firmicutes;Clostridia;Clostridiales;Ruminococcaceae;Oscillospira;?	0	0	0	0	0	0	0	0	0	2.98582	0	0	0	2.88181	2.33612	2.31757	0	0	4.27762	2.81956	0	6.57272	0	0	0	0	0	0	0	2.58034	0	2.11073	0	1.24687	0	0
OTU_326	OTU_326;Bacteria;Firmicutes;Clostridia;Clostridiales;Ruminococcaceae;?;?	0	0.848202	0	1.65279	0	0	0	0	3.80703	1.25359	0	1.66677	0	0	1.5968	0	2.26824	0	1.05802	1.14528	0	1.91466	0	4.15496	0	0	0	0	1.95656	4.34346	3.01865	4.32803	2.65585	0.754146	3.64358	3.45613
OTU_327	OTU_327;Bacteria;Bacteroidetes;Bacteroidia;Bacteroidales;S24-7;?;?	0	0	0	0	0	0	0	0	0	0	0	0	0	0	0	0	0	0	0	0	0	0	0	0	0	0	0	0	2.33167	0.69831	1.84129	6.74431	0.813487	2.14834	0.655242	0
OTU_328	OTU_328;Bacteria;Firmicutes;Clostridia;Clostridiales;Ruminococcaceae;Ruminococcus;?	0	4.6443	2.13674	2.07608	0	0	0	0	0	2.70872	0	0	4.70277	1.6432	2.82256	2.80269	0	1.57735	4.43024	0	0	0	1.63903	1.19749	0	0	0	1.89089	2.7576	0.69831	1.55458	3.99421	2.01071	1.90556	3.26652	1.94485
OTU_329	OTU_329;Bacteria;Firmicutes;Clostridia;Clostridiales;Ruminococcaceae;?;?	3.19283	1.76586	3.24705	2.66926	0	0	0	0	2.41475	1.25359	2.89288	0	2.27877	0	6.78574	2.31757	2.52899	0	1.66181	0	0	0	4.24594	2.28694	3.46896	1.00043	0	0	1.10604	0	2.08036	0	0	0	0	2.39916
OTU_330	OTU_330;Bacteria;Firmicutes;Bacilli;Bacillales;Staphylococcaceae;Staphylococcus;haemolyticus	0	0	2.39152	0	0	0	0	0	0	0	0	0	2.76106	0	2.82256	4.38713	0.966677	2.31279	0	1.77559	0	1.91466	2.06069	1.19749	3.34442	0	0	0	0	3.18489	0	0	1.33051	1.61348	1.44607	5.80379
OTU_331	OTU_331;Bacteria;Bacteroidetes;Bacteroidia;Bacteroidales;Rikenellaceae;?;?	0	0	0	0	2.00667	0	0	1.78244	0	3.41825	3.17543	0	2.76106	0	0	0	2.52899	0	1.66181	1.14528	0	4.53369	4.07547	0	1.50153	0	1.24434	3.99072	1.10604	0.69831	3.23201	0.871666	3.62782	0.754146	4.0463	0.776097
OTU_332	OTU_332;Bacteria;Firmicutes;Bacilli;Lactobacillales;Streptococcaceae;Lactococcus;?	3.05825	1.76586	3.86698	2.66926	0	0	0	0	0	3.41825	0	1.66677	0	0	0	2.80269	0	1.99144	2.6804	2.81956	2.14134	2.89994	0	1.19749	0	1.58553	0	4.41378	1.10604	1.8034	1.19639	4.38644	1.33051	2.84392	3.08295	0
OTU_333	OTU_333;Bacteria;Firmicutes;Clostridia;Clostridiales;Eubacteriaceae;Anaerofustis;?	1.78375	3.17034	0.887072	0	2.00667	0	0.845868	0	4.40717	4.0204	0	4.50781	0	2.39153	0	2.31757	2.74975	2.79756	2.6804	3.95816	2.47222	2.89994	4.98464	2.28694	0	0	0	2.33998	0	1.8034	0	0	0	0	1.72226	0
OTU_334	OTU_334;Bacteria;Firmicutes;Clostridia;Clostridiales;Lachnospiraceae;?;?	0	2.3223	3.59006	1.65279	0	1.80614	1.37556	0	1.2893	2.36543	0	3.56987	0	0	0	0	0	0	0	1.14528	0	3.2189	0	3.66	0	0	0	0	0	4.42934	0	0	0	3.20783	3.50435	4.1779
OTU_335	OTU_335;Bacteria;Firmicutes;Erysipelotrichi;Erysipelotrichales;Erysipelotrichaceae;?;?	4.62162	0	0	2.40294	0	0	0	0	1.2893	0	0	0	0	3.53827	0	1.58133	1.54036	1.57735	5.75546	2.21278	0	0.943674	3.24158	2.62612	2.4799	0	0	4.2177	2.15627	0	2.08036	0	0	0	0	0
OTU_336	OTU_336;Bacteria;Firmicutes;Bacilli;Bacillales;Planococcaceae;Sporosarcina;?	0	0	3.68839	0	0	0	0	0	1.2893	1.91407	0	6.0017	3.41028	2.39153	3.92344	2.80269	0	0	2.6804	1.77559	0	4.28306	0	0	2.22122	0	5.44103	0	0	2.8532	0	1.41118	0	0	0	0
OTU_337	OTU_337;Bacteria;Firmicutes;Bacilli;Bacillales;Planococcaceae;Sporosarcina;?	4.80091	0	0	2.40294	0	1.80614	0	2.82786	4.40717	1.25359	0	3.278	1.54909	0	2.33612	2.80269	4.57918	0	3.56324	0	0	3.06822	2.65224	2.28694	3.96822	1.00043	0	0	0	0.69831	0	0	0	0	0	0
OTU_338	OTU_338;Bacteria;Firmicutes;Clostridia;Clostridiales;Ruminococcaceae;Ruminococcus;?	0	0.848202	0	2.89399	0	2.24658	3.86343	4.17637	0	0	0	0	3.12189	0	0	0	0	0.994296	0	0	0	0.943674	5.75125	1.19749	0	0	1.90235	0	0	0	0.718811	0	2.81959	3.58329	2.32888	1.94485
OTU_339	OTU_339;Bacteria;Firmicutes;Clostridia;Clostridiales;?;?;?	2.90982	2.07074	2.60798	4.68149	0	0	2.7184	0	2.76051	0	0	0	0	0	2.33612	2.31757	1.94972	0	2.6804	1.14528	0	0	2.38657	0	3.58359	0	2.6952	2.68196	1.44827	2.24355	3.32791	0	2.2592	0	3.08295	1.94485
OTU_340	OTU_340;Bacteria;Firmicutes;Clostridia;Clostridiales;Lachnospiraceae;?;?	3.89189	1.3788	0	4.68149	0	0	0	1.15059	1.9591	0	3.61449	0	0	1.6432	5.74531	0	0	0	1.05802	0	0	3.70094	0	0	3.96822	0	0	0	0	0	2.28539	1.41118	2.01071	3.31124	0	0
OTU_341	OTU_341;Bacteria;Firmicutes;Clostridia;Clostridiales;?;?;?	3.05825	1.3788	2.39152	4.18231	0	0	0	0	1.2893	2.36543	0	0	0	0	1.5968	0	2.52899	0	3.68961	3.57374	1.09575	2.48983	2.06069	0	3.34442	1.00043	0	0	0	2.8532	3.01865	2.57982	2.65585	0	1.72226	3.14362
OTU_342	OTU_342;Bacteria;Firmicutes;Clostridia;Clostridiales;Ruminococcaceae;Oscillospira;?	2.09004	1.3788	1.82711	0	0	0	0	0	0	2.98582	2.54118	0	0	3.53827	3.47555	3.16508	2.26824	0	6.13447	0	1.71126	2.23072	0	0	0	0	0	0	0	2.58034	0.718811	3.34021	0	0.754146	1.95397	0
OTU_343	OTU_343;Bacteria;Firmicutes;Bacilli;Lactobacillales;Streptococcaceae;Streptococcus;?	2.55739	0.848202	2.39152	1.05117	3.00777	3.28387	2.53209	0	3.64993	4.24766	0	2.9117	3.12189	3.24706	2.33612	3.45448	2.26824	3.68989	1.66181	1.14528	2.14134	0.943674	4.16322	1.8427	0	0	0	3.3896	0	2.24355	0.718811	0.871666	0	0	1.10418	0.776097
OTU_344	OTU_344;Bacteria;Firmicutes;Clostridia;Clostridiales;?;?;?	2.09004	4.21767	2.79617	0	0	0	0	0	1.2893	0	0	2.41955	0	1.6432	3.18569	2.31757	0.966677	0	0	0	0	0	1.04074	0	0	0	0	0	0	0.69831	1.84129	5.92466	0.813487	1.90556	1.44607	0
OTU_345	OTU_345;Bacteria;Firmicutes;Clostridia;Clostridiales;Lachnospiraceae;?;?	2.55739	3.70087	0	0	0	0	0	0	2.76051	2.36543	2.07511	0	0	0	3.92344	2.80269	0	0	3.42473	0	0	3.06822	3.6588	2.90053	0	0	0	1.89089	2.15627	2.97244	3.58244	2.11073	2.01071	2.35609	2.32888	0
OTU_346	OTU_346;Bacteria;Firmicutes;Clostridia;Clostridiales;?;?;?	0	1.3788	0.887072	5.68352	0	4.10692	0	0	0	1.25359	0	0	0	2.39153	5.90007	2.31757	2.26824	0	3.56324	0	0	1.50936	0	0	0	1.00043	0	0	1.44827	1.8034	1.19639	1.80295	0.813487	0	1.44607	0
OTU_347	OTU_347;Bacteria;Firmicutes;Clostridia;Clostridiales;Ruminococcaceae;?;?	3.42933	2.07074	0.887072	1.05117	0	0	0	0	2.41475	0	0	3.56987	0	3.53827	1.5968	1.58133	1.54036	2.99	3.27151	1.14528	0	3.59467	0	1.19749	0.937883	1.00043	1.24434	3.18997	1.95656	2.97244	3.98677	2.11073	2.2592	1.24687	1.44607	1.94485
OTU_349	OTU_349;Bacteria;Firmicutes;Clostridia;Clostridiales;?;?;?	2.74434	2.3223	0.887072	5.5578	0	0	0	0	1.2893	1.25359	0	0	2.27877	2.88181	0	1.58133	0	2.57544	1.05802	1.77559	0	3.06822	1.63903	1.19749	0	0	0	0	1.10604	0.69831	3.01865	0.871666	2.01071	2.14834	2.75463	2.88994
OTU_350	OTU_350;Bacteria;Tenericutes;Mollicutes;RF39;?;?;?	0	0	0	0	0	0	0	0	0	0	0	2.9117	0	0	0	0	0	6.93118	0	0	0	0	0	0	0	0	0	0	0	0	0	0	0	0	0	0
OTU_351	OTU_351;Bacteria;Firmicutes;Clostridia;Clostridiales;Peptococcaceae;rc4-4;?	0	0	0	1.65279	1.59089	1.16898	0	2.22037	3.03922	1.25359	0	1.66677	0	0	0	4.24277	0	0	0	2.21278	0	3.70094	0	2.90053	2.22122	2.32261	0	0	0	1.51995	3.58244	2.57982	0.813487	4.18315	1.72226	3.63225
OTU_352	OTU_352;Bacteria;Firmicutes;Clostridia;Clostridiales;Lachnospiraceae;?;?	0	0	0	0	0	0	0	0	0	0	0	0	0	4.16901	2.82256	0	0	6.6034	0	0	0	0	0	0	0	0	0	3.18997	0	0	0	0.871666	1.33051	2.35609	0	0.776097
OTU_353	OTU_353;Bacteria;Bacteroidetes;Bacteroidia;Bacteroidales;S24-7;?;?	0	0	0	0	0	0	0	0	0	0	0	0	0	0	0	0	0	0	0	0	0	0	0	0	0	0	0	0	0.656514	0	0	6.67571	0	0	0	0
OTU_355	OTU_355;Bacteria;Firmicutes;Clostridia;Clostridiales;Christensenellaceae;?;?	0	0	0	0	0	0	0	0	0	0	2.54118	6.3483	0	0	0	0	1.54036	0	6.47001	0	0	0	0	0	0	0	0	0	0	0	0	0	0	0	0	0
OTU_356	OTU_356;Bacteria;Firmicutes;Clostridia;Clostridiales;Clostridiaceae;?;?	0	0	3.94861	0	0	0	0	0	1.9591	0	0	0	0	0	0	2.80269	3.63831	4.2371	0	3.04812	2.14134	0	0	1.8427	2.69917	0	3.57928	0	0	0	0	4.32803	3.53659	1.90556	1.10418	0
OTU_357	OTU_357;Bacteria;Firmicutes;Clostridia;Clostridiales;Ruminococcaceae;?;?	3.63246	4.4467	3.59006	0	0	0	0	2.22037	0	0	0	0	0	1.6432	0	4.63863	0.966677	3.15977	0	1.14528	2.47222	0	3.53267	1.19749	0	1.00043	2.6952	1.23531	0	0	2.89884	0	0	0	2.48518	0
OTU_358	OTU_358;Bacteria;Firmicutes;Clostridia;Clostridiales;Ruminococcaceae;Oscillospira;?	2.09004	0	1.82711	1.05117	0	0	0	0	0	1.25359	0	0	3.85641	1.6432	0	2.31757	0.966677	0.994296	5.53751	0	0	2.23072	0	2.28694	2.4799	0	1.24434	1.23531	1.95656	1.16685	1.19639	2.57982	3.94407	0.754146	1.95397	0.776097
OTU_359	OTU_359;Bacteria;Firmicutes;Bacilli;Bacillales;Planococcaceae;?;?	0	0	0.887072	0	0	5.92906	0	3.5826	0	0	0	0	1.54909	5.12834	0	1.58133	0	0	1.05802	0	0	5.01776	0	2.90053	0	0	1.90235	0	0	0	0	0	0	0	0	0
OTU_360	OTU_360;Bacteria;Firmicutes;Clostridia;Clostridiales;Ruminococcaceae;?;?	2.09004	0	0	0	0	0	0	0	0	1.91407	0	0	0	0	4.10415	0	0	1.99144	2.08617	1.14528	2.74118	2.70941	3.24158	1.19749	0	0	0	0	0	3.37003	0.718811	5.40901	0	2.35609	1.72226	0
OTU_361	OTU_361;Bacteria;Firmicutes;Clostridia;Clostridiales;Peptostreptococcaceae;?;?	1.39441	0	3.48453	1.05117	0	0	0	2.22037	0	3.75051	1.38232	0	0	0	0	2.80269	0.966677	2.79756	0	0	0	2.70941	1.04074	2.28694	0	0	2.6952	0	1.95656	3.08257	3.98677	2.11073	1.71033	0	0	3.78919
OTU_362	OTU_362;Bacteria;Actinobacteria;Actinobacteria;Actinomycetales;Corynebacteriaceae;Corynebacterium;?	0	3.17034	0	3.41276	1.59089	1.80614	1.37556	3.42765	0	2.98582	0	3.81251	0	1.6432	1.5968	2.31757	0	0	0	0	2.47222	4.79593	3.39445	1.19749	0	0	0	4.10867	0	2.24355	0	0	0.813487	0.754146	0	2.18981
OTU_364	OTU_364;Bacteria;Firmicutes;Bacilli;Bacillales;Bacillaceae;Bacillus;?	0	0	0	0	0	0	0	0	0	3.21818	0	2.41955	0	0	3.18569	0	0	0	4.10694	0	0	6.20848	2.38657	0	0	0	0	0	0	0	0	0	0	0	0	0
OTU_365	OTU_365;Bacteria;Firmicutes;Clostridia;Clostridiales;Ruminococcaceae;Oscillospira;?	1.39441	3.2932	0	4.34338	1.00445	0	0	0	1.2893	0	3.4116	0	1.54909	0	1.5968	2.80269	1.94972	0	0	0	0	3.35533	0	0	0	0	0	1.23531	0.656514	2.24355	3.92677	2.11073	2.01071	2.14834	1.72226	2.18981
OTU_366	OTU_366;Bacteria;Firmicutes;Erysipelotrichi;Erysipelotrichales;Erysipelotrichaceae;?;?	0	0	0	0	0	0	0	0	0	0	0	0	0	0	0	0	0	0	0	0	0	0	0	7.14955	0	0	0	0	0	0	0	0	0	0	0	0
OTU_367	OTU_367;Bacteria;Firmicutes;Clostridia;Clostridiales;Ruminococcaceae;Oscillospira;?	0.859495	0.848202	0	2.40294	0	0	0	0	0	0	0	0	0	0	0	0	0	5.9195	0	0	0	0.943674	0	0	0	0	0	0	0	0	3.92677	3.99421	0	0.754146	0	0
OTU_368	OTU_368;Bacteria;Firmicutes;Clostridia;Clostridiales;Ruminococcaceae;Oscillospira;?	4.66858	3.03603	0	2.07608	0	0	0	0	0	0	2.07511	1.66677	0	0	1.5968	0	0	0	4.69419	2.21278	0	1.91466	3.53267	0	0	0	0	0	1.10604	0.69831	1.19639	2.36426	0.813487	0.754146	1.72226	1.94485
OTU_369	OTU_369;Bacteria;Firmicutes;Clostridia;Clostridiales;Lachnospiraceae;?;?	0.859495	0	0	0	0	0	0	1.78244	0	0	2.07511	1.66677	0	0	0	0	0	0	0	0	0	0	0	0	0	0	0	0	0	0.69831	0	0	0	0	5.79737	0.776097
OTU_370	OTU_370;Bacteria;Firmicutes;Clostridia;Clostridiales;Ruminococcaceae;Ruminococcus;?	3.05825	4.59738	0	1.65279	0	0	0	0	1.2893	2.36543	0	0	0	2.39153	2.33612	0	0	1.57735	4.01337	0	0	1.50936	0	0	0	0	0	0	0	1.51995	0.718811	3.74917	2.2592	2.14834	2.48518	0
OTU_372	OTU_372;Bacteria;Firmicutes;Clostridia;Clostridiales;Christensenellaceae;?;?	1.39441	0	1.43234	0	0	0	0	1.78244	3.03922	1.25359	1.38232	1.66677	0	0	0	3.16508	0	0	0	0	0	0	0	2.90053	0	0	0	0	0	4.42934	0	1.41118	0	1.24687	3.50435	4.2336
OTU_373	OTU_373;Bacteria;Firmicutes;Clostridia;Clostridiales;?;?;?	0.859495	3.03603	0	2.66926	0	0	0	0	1.2893	0	0	0	3.12189	0	1.5968	1.58133	0	0	0	0	0	0.943674	1.04074	0	2.88948	2.00064	3.73573	0	0.656514	1.51995	3.41784	1.41118	2.96663	2.14834	3.88724	0
OTU_374	OTU_374;Bacteria;Firmicutes;Clostridia;Clostridiales;Ruminococcaceae;Oscillospira;?	6.23095	0	0	1.05117	0	0	0	0	0	0	0	0	0	0	0	0	0	0	0	0	0	0	1.04074	0	0	0	0	0	1.10604	0	0.718811	0	0	0	1.44607	1.27797
OTU_375	OTU_375;Bacteria;Firmicutes;Clostridia;Clostridiales;?;?;?	2.34256	0.848202	2.39152	0	0	0	0	0	1.2893	0	0	2.9117	0	0	1.5968	2.31757	0	0	4.69419	1.14528	1.09575	0.943674	1.04074	3.66	0	0	0	3.18997	1.10604	3.68139	0.718811	1.80295	3.33478	0.754146	0	0
OTU_376	OTU_376;Bacteria;Firmicutes;Bacilli;Lactobacillales;Aerococcaceae;Facklamia;?	0	0	0	0	0	0	0	0	0	5.26219	0	2.41955	0	5.12834	5.1465	4.94893	3.26138	0	3.10005	0	0	0.943674	2.06069	0	0	0	0	0	0	0	0	0	0	0	0	0
OTU_377	OTU_377;Bacteria;Firmicutes;Clostridia;Clostridiales;Ruminococcaceae;?;?	0	1.3788	0	2.66926	0	0	0	0	0	6.57191	2.07511	0	2.27877	1.6432	2.33612	0	0	0	0	0	0	0	0	0	0	0	0	1.89089	0	0	0	2.57982	0	0.754146	1.72226	0
OTU_378	OTU_378;Bacteria;Firmicutes;Clostridia;Clostridiales;Ruminococcaceae;?;?	2.09004	0	3.86698	0	0	0	2.53209	0	0	0	2.07511	1.66677	0	0	0	0	0	1.57735	0	0	0	0	0	2.28694	2.4799	2.00064	1.90235	0	3.4325	2.24355	1.55458	2.11073	2.2592	2.35609	0	3.02235
OTU_379	OTU_379;Bacteria;Verrucomicrobia;Verrucomicrobiae;Verrucomicrobiales;Verrucomicrobiaceae;Akkermansia;muciniphila	0	1.3788	0.887072	1.65279	3.32992	1.16898	3.40165	3.5826	0	0	3.4116	3.278	1.54909	0	0	0	0.966677	0	0	0	2.74118	2.23072	0	1.19749	3.96822	0	3.40378	0	1.10604	0.69831	2.08036	0	0	1.61348	0	1.27797
OTU_380	OTU_380;Bacteria;Firmicutes;Clostridia;Clostridiales;Peptococcaceae;?;?	0	0	0	0	0	0	0	0	0	0	0	0	0	0	0	0	0	5.68923	0	0	0	0	0	0	0	0	0	1.89089	0.656514	1.8034	3.92677	1.41118	1.33051	0.754146	1.44607	2.39916
OTU_381	OTU_381;Bacteria;Bacteroidetes;Bacteroidia;Bacteroidales;S24-7;?;?	0	0	0	0	0	0	0	0	0	0	0	0	0	0	0	0	0	0	0	0	0	0	0	0	0	0	0	0	1.95656	3.28043	2.76817	4.54868	3.87127	2.97569	1.95397	1.94485
OTU_382	OTU_382;Bacteria;Firmicutes;Clostridia;Clostridiales;Ruminococcaceae;?;?	0	1.3788	3.68839	0	0	0	0	0	2.41475	2.70872	2.07511	1.66677	0	0	0	4.74964	0	0	0	0	0	2.23072	0	2.62612	0	0	0	0	0	3.60962	0.718811	2.57982	0	0	1.10418	3.78919
OTU_383	OTU_383;Bacteria;Firmicutes;Clostridia;Clostridiales;Ruminococcaceae;?;?	1.39441	1.3788	2.60798	0	2.81497	0	0	0	1.2893	1.25359	0	1.66677	1.54909	1.6432	2.33612	1.58133	0	0	1.05802	4.06648	2.14134	0.943674	0	0	1.90579	0	0	1.23531	1.44827	2.24355	1.84129	2.93323	3.87127	0	1.44607	1.6496
OTU_384	OTU_384;Bacteria;Firmicutes;Clostridia;Clostridiales;?;?;?	0	0.848202	0	1.65279	0	2.85651	0	0	0	2.36543	3.17543	3.278	0	0	1.5968	0	0	0.994296	1.66181	0	2.14134	4.475	0	1.19749	0	0	1.24434	2.68196	2.98463	1.8034	1.84129	2.93323	0.813487	0	2.15357	0
OTU_386	OTU_386;Bacteria;Proteobacteria;Alphaproteobacteria;?;?;?;?	2.74434	0	3.37067	2.40294	0	0	0	0	0	0	0	0	0	0	0	2.80269	0	0	0	0	2.14134	4.53369	0	1.19749	1.50153	0	0	3.18997	0	3.18489	1.84129	2.11073	2.01071	0	1.72226	0
OTU_387	OTU_387;Bacteria;Bacteroidetes;Bacteroidia;Bacteroidales;Rikenellaceae;?;?	1.78375	0.848202	0.887072	0	2.00667	0	2.31809	1.15059	1.2893	0	0	7.17544	0	0	2.33612	0	0.966677	0.994296	0	0	0	0	1.04074	0	1.90579	0	0	0	0	0	0	0	0	0	0	0
OTU_388	OTU_388;Bacteria;Tenericutes;Mollicutes;RF39;?;?;?	0	1.3788	0	0	0	0	0	0	0	0	0	0	0	0	0	0	0	0	4.10694	0	0	0	0	0	0	0	0	2.68196	3.18075	0	4.15311	2.57982	4.01338	0	1.10418	0
OTU_389	OTU_389;Bacteria;Firmicutes;Clostridia;Clostridiales;Ruminococcaceae;Oscillospira;?	0	0	0	0	0	0	0	0	0	0	2.07511	0	0	1.6432	0	2.80269	0	0.994296	1.66181	0	0	0	1.04074	0	0	0	1.24434	0	2.15627	3.81503	3.12927	3.45382	2.2592	2.97569	2.48518	1.6496
OTU_390	OTU_390;Bacteria;Firmicutes;Clostridia;Clostridiales;Ruminococcaceae;?;?	0	0	0.887072	2.66926	0	0	0	0	4.30547	2.36543	0	0	2.76106	2.39153	4.87509	2.31757	0	2.31279	3.10005	2.54783	0	1.50936	1.04074	1.19749	1.50153	0	0	0	0	0	3.12927	3.08202	1.33051	0.754146	0	0
OTU_391	OTU_391;Bacteria;Firmicutes;Clostridia;Clostridiales;Ruminococcaceae;Oscillospira;?	1.78375	1.3788	0.887072	1.65279	0	0	0	0	1.2893	1.91407	0	0	0	3.53827	2.33612	3.69541	0.966677	0	5.06445	0	0	0.943674	0	0	0	0	0	2.95821	0	3.37003	0	2.57982	0	0	1.10418	1.6496
OTU_392	OTU_392;Bacteria;Firmicutes;Clostridia;Clostridiales;Ruminococcaceae;Oscillospira;?	0.859495	0	0	0	0	0	0	0	0	0	0	0	0	0	0	0	0	0	0	0	0	0.943674	0	0	0	0	0	0	0.656514	0.69831	5.56984	3.21688	0	0	0	0
OTU_393	OTU_393;Bacteria;Tenericutes;Mollicutes;Anaeroplasmatales;Anaeroplasmataceae;Anaeroplasma;?	0	2.07074	1.82711	0	2.32904	1.16898	0	0	2.76051	0	0	0	0	1.6432	0	0	0	1.57735	2.08617	3.24538	0	3.06822	2.38657	2.62612	3.20812	0	0	2.95821	2.98463	0	2.08036	0	2.47112	0	0	1.94485
OTU_394	OTU_394;Bacteria;Firmicutes;Erysipelotrichi;Erysipelotrichales;Erysipelotrichaceae;?;?	0	0	0	0	0	0	0	0	0	0	0	0	0	0	0	0	0	0	0	0	0	6.31272	0	0	0	0	0	0	0	0	0	0	0	0	0	0
OTU_395	OTU_395;Bacteria;Firmicutes;Clostridia;Clostridiales;Ruminococcaceae;Ruminococcus;?	0	0	0	0	0	0	0	0	0	0	0	7.33942	0	0	0	0	0	0	0	0	0	1.91466	0	0	0	0	0	0	0	0	1.19639	0	0	2.14834	0	0.776097
OTU_396	OTU_396;Bacteria;Actinobacteria;Coriobacteriia;Coriobacteriales;Coriobacteriaceae;Adlercreutzia;?	0	2.72286	1.43234	0	3.46751	0	1.37556	2.82786	3.47361	0	0	2.41955	1.54909	0	0	0	0	0	0	1.14528	4.49873	1.91466	3.88212	0	0	1.00043	0	1.23531	2.15627	0.69831	0	0	0	0	0.655242	0
OTU_398	OTU_398;Bacteria;Bacteroidetes;Sphingobacteriia;Sphingobacteriales;Sphingobacteriaceae;Sphingobacterium;?	0	0	0	0	0	0	0	0	0	6.32027	0	2.41955	0	0	1.5968	2.31757	1.94972	0	0	1.14528	0	3.47996	0	0	0	0	1.90235	0	0	0	0	0	0	0	0	0
OTU_399	OTU_399;Bacteria;Proteobacteria;Betaproteobacteria;Burkholderiales;Oxalobacteraceae;?;?	0	0	0	0	0	0	0	0	0	0	0	0	0	0	0	0	0	0	0	0	0	0	0	0	0	0	0	0	3.50752	3.74975	2.08036	3.45382	1.33051	2.84392	1.44607	3.02235
OTU_400	OTU_400;Bacteria;Firmicutes;Clostridia;Clostridiales;Ruminococcaceae;?;?	0	0	0	0	0	0	0	0	1.2893	0	0	2.41955	2.27877	0	3.18569	0	0	0	0	0	0	0	0	1.19749	0	2.58567	2.35257	3.3896	0.656514	0	3.58244	3.08202	1.33051	3.40774	2.87257	0
OTU_401	OTU_401;Bacteria;Firmicutes;Clostridia;Clostridiales;?;?;?	0	0	0	1.65279	0	0	0	0	0	1.25359	2.07511	0	0	0	2.82256	0	1.54036	0	3.10005	0	0	1.50936	0	2.90053	2.4799	1.58553	0	3.18997	0	0	2.46487	4.4966	0	2.35609	1.10418	0
OTU_402	OTU_402;Bacteria;Firmicutes;Clostridia;Clostridiales;?;?;?	0.859495	3.70087	0	0	0	0	0	3.96722	1.2893	0	0	0	2.76106	1.6432	2.33612	1.58133	0	0	0	0	0	0	2.38657	0	0.937883	0	1.24434	0	3.18075	0	1.19639	3.45382	0.813487	0	1.95397	1.27797
OTU_403	OTU_403;Bacteria;Firmicutes;Clostridia;Clostridiales;Ruminococcaceae;?;?	1.78375	1.76586	1.82711	1.05117	0	0	0	0	1.2893	2.70872	0	0	0	0	0	3.16508	0.966677	2.31279	2.08617	0	1.09575	2.48983	2.87651	1.8427	0	0	0	0	0.656514	3.45439	2.28539	1.41118	0.813487	0	1.72226	2.39916
OTU_404	OTU_404;Bacteria;Firmicutes;Clostridia;Clostridiales;Ruminococcaceae;Oscillospira;?	0	0.848202	0.887072	1.05117	0	0	0	0	0	0	0	0	2.27877	3.53827	0	0	0	1.99144	0	2.21278	0	0	0	2.28694	5.16177	0	3.87687	0	0	0	0.718811	2.93323	0	0	0	0
OTU_405	OTU_405;Bacteria;Firmicutes;Clostridia;Clostridiales;?;?;?	3.19283	0	2.13674	0	0	0	0	0	3.03922	0	0	0	0	0	3.18569	0	0	0	0	4.4331	1.71126	1.50936	0	1.8427	0	0	0	3.99072	0	2.97244	1.55458	2.36426	0	0	0	0
OTU_406	OTU_406;Bacteria;Firmicutes;Bacilli;Bacillales;Planococcaceae;Sporosarcina;?	0	0	0	1.05117	0	1.16898	1.37556	0	1.9591	1.25359	0	3.81251	0	0	4.10415	0	1.54036	0	4.86462	2.81956	0	4.28306	1.63903	0	0	0	0	0	0	0	0	0	0	0	0	0
OTU_407	OTU_407;Bacteria;Bacteroidetes;Bacteroidia;Bacteroidales;Rikenellaceae;?;?	0	0	0	5.62203	0	0	0	0	0	0	5.11871	0	0	0	0	0	0	0	0	0	0	0	0	0	0	0	0	0	1.44827	0	0	1.80295	2.01071	0	0	0
OTU_408	OTU_408;Bacteria;Firmicutes;Clostridia;Clostridiales;?;?;?	0	0	0	0	0	0	0	0	0	0	2.54118	0	0	0	2.82256	0	0	0	0	0	0	0	0	0	0	0	0	0	3.4325	5.06071	0	0	0	0	0	0
OTU_409	OTU_409;Bacteria;Actinobacteria;Coriobacteriia;Coriobacteriales;Coriobacteriaceae;?;?	0.859495	0	0	0	0	0	2.06674	0	0	2.36543	2.07511	1.66677	0	0	0	0	0	0	2.41367	2.21278	0	1.50936	3.07056	0	0	0	1.24434	2.33998	0.656514	1.8034	2.62448	1.41118	0	4.23668	1.10418	0
OTU_410	OTU_410;Bacteria;Bacteroidetes;Bacteroidia;Bacteroidales;S24-7;?;?	2.09004	0	0	0	0	1.16898	0	0	0	0	2.54118	0	1.54909	0	0	0	0.966677	0	0	0	1.09575	0	0	0	0	0	0	1.23531	0	0	4.84652	0	0	0	3.50435	0
OTU_412	OTU_412;Bacteria;Firmicutes;Clostridia;Clostridiales;Ruminococcaceae;?;?	0	0.848202	1.43234	0	0	0	0	0	0	0	0	0	0	1.6432	0	3.16508	0	0	0	1.14528	1.09575	3.06822	0	2.90053	0	0	0	0	0	2.97244	0	3.34021	0	1.90556	1.72226	3.86169
OTU_414	OTU_414;Bacteria;Bacteroidetes;Bacteroidia;Bacteroidales;S24-7;?;?	1.78375	0	0	0	0	0	0	1.15059	2.76051	0	0	0	0	0	0	0	2.26824	0	0	1.14528	0	0	0	0	3.34442	5.4271	3.40378	0	0	0	0	0	0	0	0	0
OTU_415	OTU_415;Bacteria;Firmicutes;Clostridia;Clostridiales;Ruminococcaceae;?;?	0	0.848202	0	0	0	0	1.76215	0	0	2.36543	1.38232	0	3.41028	0	0	0	0	0	2.08617	0	0	2.48983	2.06069	2.28694	0	0	0	0	2.48804	1.51995	3.23201	2.36426	2.01071	0	0.655242	3.02235
OTU_416	OTU_416;Bacteria;Firmicutes;Clostridia;Clostridiales;Ruminococcaceae;?;?	0	2.3223	0	0	0	0	0	0	0	1.91407	0	1.66677	2.27877	0	1.5968	0	0	0	2.90543	0	0	1.50936	0	0	0	0	0	0	2.62911	2.8532	2.28539	2.11073	3.53659	0	1.44607	1.94485
OTU_418	OTU_418;Bacteria;Firmicutes;Clostridia;Clostridiales;?;?;?	0	0.848202	1.82711	2.07608	1.59089	2.24658	2.88338	0	0	0	3.17543	0	0	0	2.33612	0	0	0	3.10005	0	1.09575	3.2189	0	2.28694	0	0	3.40378	1.89089	0	0	2.28539	1.80295	0	0	1.44607	0
OTU_419	OTU_419;Bacteria;Verrucomicrobia;Verrucomicrobiae;Verrucomicrobiales;Verrucomicrobiaceae;?;?	0	1.3788	0.887072	0	2.59237	1.16898	3.03142	3.25403	0	0	2.89288	0	3.41028	1.6432	0	0	1.94972	2.31279	0	0	2.14134	0.943674	0	0	3.34442	1.58553	3.73573	0	0	0	0	0	0	0	0	0
OTU_420	OTU_420;Bacteria;Bacteroidetes;Bacteroidia;Bacteroidales;S24-7;?;?	0	0	0	0	0	0	0	0	0	0	1.38232	7.15357	0	0	0	0	0	0	0	0	0	0	0	0	0	0	0	0	0	0	0	0	0	0	0	0
OTU_421	OTU_421;Bacteria;Firmicutes;Erysipelotrichi;Erysipelotrichales;Erysipelotrichaceae;?;?	1.78375	0	0	0	0	0	0	0	0	2.98582	0	0	4.70277	1.6432	0	0	0	0	3.68961	0	0	2.23072	0	0	0	0	0	0	3.77378	0	0	0	0	0	0	2.18981
OTU_422	OTU_422;Bacteria;Firmicutes;Clostridia;Clostridiales;Ruminococcaceae;?;?	0	0	0	0	0	0	0	0	0	0	0	3.81251	0	0	0	0	0	0	0	0	0	5.76973	0	0	0	0	0	0	0	0	0	0	0	0	0	0
OTU_423	OTU_423;Bacteria;Firmicutes;Clostridia;Clostridiales;Ruminococcaceae;?;?	0	1.3788	0.887072	0	1.00445	0	0.845868	1.15059	1.9591	0	1.38232	0	1.54909	0	0	2.31757	0	0	0	0	1.09575	0.943674	1.04074	3.32967	0	0	0	1.23531	1.95656	3.28043	2.28539	0	2.01071	0.754146	0	3.02235
OTU_424	OTU_424;Bacteria;Firmicutes;Clostridia;Clostridiales;Ruminococcaceae;?;?	0	0	0	1.05117	0	0	2.7184	3.42765	0	0	2.07511	2.9117	0	0	0	2.31757	0	0	0	0	2.47222	0.943674	0	1.8427	0	2.80809	0	1.23531	2.33167	0	2.62448	0.871666	0.813487	0	1.72226	2.18981
OTU_425	OTU_425;Bacteria;Verrucomicrobia;Verrucomicrobiae;Verrucomicrobiales;Verrucomicrobiaceae;Akkermansia;muciniphila	0	1.3788	2.13674	1.05117	2.59237	2.85651	2.06674	3.42765	1.2893	0	2.89288	0	2.27877	3.24706	0	0	2.52899	0.994296	0	0	0	0	0	0	1.50153	2.32261	2.6952	2.95821	1.10604	0	0	0	0	0	0	0
OTU_426	OTU_426;Bacteria;Firmicutes;Clostridia;Clostridiales;Ruminococcaceae;?;?	1.39441	0	2.39152	0	1.00445	0	1.37556	0	0	0	0	1.66677	0	0	1.5968	2.31757	0	0	1.66181	2.21278	0	2.89994	0	0	0	2.58567	0	0	1.95656	1.8034	1.55458	2.93323	2.47112	1.24687	1.44607	0.776097
OTU_427	OTU_427;Bacteria;Firmicutes;Clostridia;Clostridiales;Lachnospiraceae;?;?	2.09004	0	0.887072	2.07608	0	0	1.37556	0	0	0	0	0	0	2.88181	0	0	0.966677	1.57735	0	1.14528	0	0	0	2.90053	2.69917	3.46021	1.24434	0	0	1.51995	1.84129	0	2.01071	0.754146	2.48518	1.6496
OTU_428	OTU_428;Bacteria;Firmicutes;Clostridia;Clostridiales;?;?;?	2.74434	0	0	1.05117	0	0	0	0	2.76051	0	0	0	0	0	0	0	0	0	4.43024	0	1.09575	0	1.04074	0	0.937883	0	1.90235	0	0	3.08257	0	0	0	2.14834	2.15357	1.6496
OTU_429	OTU_429;Bacteria;Firmicutes;Clostridia;Clostridiales;Ruminococcaceae;?;?	0	0	2.13674	3.25967	0	0	0	0	1.2893	1.91407	0	0	0	0	0	5.20415	0	1.57735	0	1.14528	1.09575	0.943674	0	0	1.50153	0	0	3.18997	0.656514	1.8034	1.55458	2.93323	0	0	0	0
OTU_430	OTU_430;Bacteria;Firmicutes;Erysipelotrichi;Erysipelotrichales;Erysipelotrichaceae;Coprobacillus;?	0	0	0	0	0	0	0	0	0	0	0	0	0	0	3.18569	0	0	0	0	0	0	5.76973	0	0	0	0	0	0	0	0	0	0	0	0	0	0
OTU_431	OTU_431;Bacteria;Actinobacteria;Coriobacteriia;Coriobacteriales;Coriobacteriaceae;?;?	0	0	0	0	0	0	5.32445	0	0	0	0	0	0	0	0	0	0	0	0	0	0	0	0	0	0	0	0	0	3.08602	0	0	0	0	0	0	0
OTU_432	OTU_432;Bacteria;Firmicutes;Clostridia;Clostridiales;Lachnospiraceae;?;?	2.34256	0	0	2.07608	0	0	0	0	0	1.25359	0	0	0	0	0	2.31757	0.966677	0	2.6804	0	0	0	0	0	0	0	0	1.89089	2.15627	0	2.28539	3.45382	2.81959	0	2.75463	0
OTU_433	OTU_433;Bacteria;Firmicutes;Clostridia;Clostridiales;Ruminococcaceae;Oscillospira;?	3.19283	2.53644	0	0	0	0	0	0	0	0	0	0	0	0	3.92344	0	0.966677	2.31279	2.08617	0	0	0	0	0	0	0	0	0	0	0	2.46487	2.57982	2.2592	1.61348	2.48518	0
OTU_435	OTU_435;Bacteria;Firmicutes;Clostridia;Clostridiales;?;?;?	0	0	0	2.40294	0	0	0	0	0	0	0	0	0	1.6432	0	0	0	2.31279	0	0	0	2.70941	0	0	2.88948	0	0	0	0	1.16685	3.92677	0	0	3.31124	0	0
OTU_436	OTU_436;Bacteria;Firmicutes;Clostridia;Clostridiales;Ruminococcaceae;?;?	1.78375	0	0	0	0	0	0	0	0	0	0	0	0	2.39153	1.5968	1.58133	0.966677	0	0	0	1.71126	0.943674	0	1.19749	0	0	0	0	0	1.51995	1.84129	4.13713	2.81959	2.53765	1.72226	0.776097
OTU_438	OTU_438;Bacteria;Firmicutes;Clostridia;Clostridiales;Lachnospiraceae;?;?	2.90982	2.88792	0	0	0	0	0	0	0	0	0	0	0	0	1.5968	1.58133	2.74975	1.99144	2.08617	0	0	0	0	2.62612	0	0	0	0	0	0	1.19639	2.93323	1.33051	2.6989	1.72226	0
OTU_439	OTU_439;Bacteria;Firmicutes;Clostridia;Clostridiales;Peptostreptococcaceae;?;?	0	0.848202	0.887072	1.65279	3.46751	0	0	0	1.9591	2.98582	0	0	0	0	0	0	1.54036	0	0	0	2.74118	0.943674	1.63903	0	1.50153	1.58553	0	0	0	0.69831	0	0	1.71033	0	0	3.86169
OTU_440	OTU_440;Bacteria;Bacteroidetes;Bacteroidia;Bacteroidales;Bacteroidaceae;Bacteroides;?	1.39441	0.848202	1.82711	1.05117	0	0	0	0	0	0	0	0	0	0	0	0	0	0.994296	0	0	0	0	0	1.8427	2.22122	2.00064	0	1.89089	2.7576	2.58034	1.19639	3.21688	2.01071	1.24687	0	1.27797
OTU_441	OTU_441;Bacteria;Verrucomicrobia;Verrucomicrobiae;Verrucomicrobiales;Verrucomicrobiaceae;Akkermansia;muciniphila	0	0	0.887072	0	2.59237	2.58354	2.53209	2.55586	1.2893	0	2.89288	2.9117	0	0	0	0	1.54036	2.31279	1.05802	1.14528	2.74118	0	0	0	1.90579	2.80809	1.90235	2.33998	0	0	0	0	1.33051	0	0	0
OTU_442	OTU_442;Bacteria;Bacteroidetes;Bacteroidia;Bacteroidales;S24-7;?;?	0.859495	0	0	0	0	0	0	3.05663	0	0	0	0	0	0	0	1.58133	2.74975	1.57735	0	1.77559	0	0	0	0	2.69917	5.00083	1.24434	0	0	0	0	0	0	0	0	0
OTU_443	OTU_443;Bacteria;Actinobacteria;Coriobacteriia;Coriobacteriales;Coriobacteriaceae;Adlercreutzia;?	2.34256	0	0	0	0	0	0	0	0	0	0	0	0	2.39153	0	0	0	0	3.91331	1.14528	1.09575	0	4.83235	1.8427	0	0	1.90235	0	0	0	0	0	2.01071	0	0	0
OTU_444	OTU_444;Bacteria;Firmicutes;Clostridia;Clostridiales;?;?;?	2.90982	0.848202	0	2.40294	0	0	0	0	0	0	2.07511	0	0	0	1.5968	1.58133	3.11014	1.99144	1.66181	0	0	0	0	2.90053	1.50153	3.46021	0	0	0	0.69831	0	0.871666	1.33051	1.24687	1.10418	0.776097
OTU_446	OTU_446;Bacteria;Tenericutes;Mollicutes;RF39;?;?;?	0	0	0	5.45576	0	0	0	0	0	0	2.54118	0	0	4.33	0	0	0	0	1.05802	0	0	0	0	0	0	0	0	0	0	0	0	0	1.33051	0	0	0
OTU_447	OTU_447;Bacteria;Firmicutes;Clostridia;Clostridiales;Ruminococcaceae;?;?	0	0	0	0	0	0	0.845868	0	0	0	0	0	0	0	0	0	0	4.57401	0	0	0	0	0	0	0	0	0	0	1.10604	4.20421	0	0	0	0	0	0
OTU_448	OTU_448;Bacteria;Firmicutes;Clostridia;Clostridiales;Ruminococcaceae;?;?	0	0	0	0	0	0	0	0	0	0	0	0	0	0	0	0	0	0	0	0	0	5.66859	0	0	0	0	0	0	0	0	0	0	0	0	0	0
OTU_449	OTU_449;Bacteria;Firmicutes;Clostridia;Clostridiales;[Acidaminobacteraceae];?;?	0.859495	0	0	1.05117	0	0	0	0	0	1.25359	0	0	0	0	0	0	1.54036	0	1.05802	1.14528	0	1.50936	2.65224	0	0	0	0	0	1.44827	3.87747	0	2.36426	2.65585	0	1.10418	0
OTU_450	OTU_450;Bacteria;Proteobacteria;Alphaproteobacteria;Rhizobiales;Rhizobiaceae;Agrobacterium;?	0	0	0	0	0	1.16898	0	0	0	4.1385	2.54118	1.66677	4.4718	1.6432	3.92344	3.16508	2.94117	0	0	0	0	2.23072	0	1.8427	0	0	0	0	0	0	0	0	0	0	0	0
OTU_451	OTU_451;Bacteria;Firmicutes;Clostridia;Clostridiales;?;?;?	0	0	4.02587	2.89399	0	3.9984	0	0	0	0	3.4116	1.66677	0	0	0	0	0	0	0	0	0	0	0	0	0	0	0	0	1.44827	0	0.718811	0	0	2.14834	0	0
OTU_452	OTU_452;Bacteria;Firmicutes;Clostridia;Clostridiales;Ruminococcaceae;?;?	0.859495	1.76586	0	0	0	0	0	0	0	0	0	0	0	0	0	0	0	0	0	0	0	0.943674	2.06069	0	0	0	0	0	2.48804	0	3.41784	3.83556	0	1.24687	0	1.6496
OTU_453	OTU_453;Bacteria;Firmicutes;Clostridia;Clostridiales;Ruminococcaceae;Ruminococcus;?	0	0	3.59006	0	0	0	0.845868	0	2.41475	2.98582	0	0	1.54909	0	0	0	0	1.99144	0	0	0	1.50936	0	0	0	0	0	1.89089	2.33167	2.24355	0.718811	2.36426	0	0.754146	0	1.27797
OTU_454	OTU_454;Bacteria;Bacteroidetes;Bacteroidia;Bacteroidales;?;?;?	1.78375	2.72286	0	0	0	0	0	0	1.9591	0	0	0	0	2.88181	0	0	1.54036	0	1.66181	0	0	0	0	0	3.05758	3.00075	2.35257	1.89089	0.656514	0.69831	1.84129	2.11073	1.33051	0	0	0
OTU_455	OTU_455;Bacteria;Firmicutes;Clostridia;Clostridiales;Ruminococcaceae;?;?	0	0.848202	0.887072	0	1.00445	0	1.76215	2.82786	0	1.25359	2.07511	0	0	0	0	1.58133	0.966677	1.57735	1.05802	1.14528	0	1.50936	1.04074	0	1.50153	2.58567	1.24434	1.23531	0	0.69831	2.08036	0	2.2592	1.90556	1.44607	0.776097
OTU_456	OTU_456;Bacteria;Firmicutes;Clostridia;Clostridiales;?;?;?	2.55739	0.848202	0	0	0	0	0	0	2.76051	2.36543	0	0	0	0	2.82256	0	0	0	2.08617	0	0	0	0	1.19749	0.937883	1.00043	0	0	1.10604	1.16685	1.55458	0	1.71033	0.754146	2.15357	3.14362
OTU_458	OTU_458;Bacteria;Firmicutes;Clostridia;Clostridiales;Peptostreptococcaceae;?;?	0	0	1.82711	1.05117	3.00777	3.28387	0	0	3.03922	1.91407	1.38232	0	1.54909	0	0	0	0	0	0	0	2.74118	0.943674	1.04074	1.19749	0.937883	1.00043	0	0	0	0	0.718811	1.80295	1.71033	1.24687	1.44607	1.27797
OTU_459	OTU_459;Bacteria;Firmicutes;Clostridia;Clostridiales;Lachnospiraceae;?;?	0.859495	2.3223	0	0	1.00445	0	0.845868	0	0	1.25359	0	1.66677	0	0	1.5968	0	0	0	2.08617	0	0	1.91466	2.38657	1.8427	0	0	0	0	1.10604	1.16685	2.76817	0	2.47112	0.754146	1.10418	2.39916
OTU_460	OTU_460;Bacteria;Bacteroidetes;Bacteroidia;Bacteroidales;S24-7;?;?	0	0	0	0	0	0	0	0	0	0	0	0	0	0	0	0	0	0	0	0	0	0	0	0	0	0	0	0	1.72468	2.58034	3.73017	2.11073	3.22219	2.14834	0	0
OTU_461	OTU_461;Bacteria;Firmicutes;Clostridia;Clostridiales;Ruminococcaceae;?;?	2.34256	1.3788	1.43234	2.40294	0	0	0.845868	0	0	1.25359	0	0	0	1.6432	0	0	0	0	0	1.14528	1.09575	1.91466	1.63903	2.62612	0.937883	0	0	1.23531	2.48804	1.51995	0	1.41118	0	0	0	2.88994
OTU_462	OTU_462;Bacteria;Tenericutes;Mollicutes;RF39;?;?;?	0	0	0	0	0	0	0	0	0	0	0	0	0	0	0	0	0	0	0	0	0	0	0	0	0	0	5.3471	4.50265	0	0	0	2.36426	0	0	0	0
OTU_463	OTU_463;Bacteria;Firmicutes;Clostridia;Clostridiales;Lachnospiraceae;?;?	1.78375	2.72286	0.887072	0	0	0	0	0	3.03922	0	0	1.66677	0	0	2.33612	0	0	0	0	0	0	0	0	2.28694	0	0	0	0	0.656514	2.24355	0.718811	0	1.71033	0	2.15357	3.14362
OTU_464	OTU_464;Bacteria;Firmicutes;Clostridia;Clostridiales;Lachnospiraceae;Dorea;?	0	2.88792	0	0	0	0	0	1.78244	2.41475	0	0	0	0	0	4.77196	2.80269	0	0	3.91331	2.54783	0	0	0	0	0	0	0	0	0	1.8034	0	0	0	0	0	0
OTU_465	OTU_465;Bacteria;Verrucomicrobia;Verrucomicrobiae;Verrucomicrobiales;Verrucomicrobiaceae;Akkermansia;muciniphila	0	0	0	0	2.00667	3.08596	2.88338	3.25403	0	0	0	0	0	0	0	0	2.74975	0.994296	0	1.14528	1.09575	0.943674	0	0	1.90579	1.00043	2.6952	1.23531	1.10604	0	0.718811	0	0	1.24687	0	0.776097
OTU_466	OTU_466;Bacteria;Firmicutes;Clostridia;Clostridiales;Ruminococcaceae;?;?	2.74434	0	0	2.40294	1.59089	0	0	0	0	1.91407	0	2.41955	0	0	2.33612	1.58133	0	0	1.05802	0	0	3.35533	0	1.19749	0	0	2.35257	0	0	2.42175	1.19639	0	0.813487	0.754146	1.44607	0
OTU_467	OTU_467;Bacteria;Verrucomicrobia;Verrucomicrobiae;Verrucomicrobiales;Verrucomicrobiaceae;Akkermansia;muciniphila	0	0	0	1.65279	1.00445	1.80614	0	3.25403	0	2.36543	0	0	0	0	0	0	1.94972	0	0	1.77559	1.09575	0.943674	0	0	2.22122	0	2.6952	2.33998	3.08602	0	0.718811	0	0	0	0	1.27797
OTU_468	OTU_468;Bacteria;Firmicutes;Clostridia;Clostridiales;Ruminococcaceae;Oscillospira;?	0	0	0	3.08838	0	0	0	0	0	1.91407	0	1.66677	2.76106	0	0	5.12399	0	0	0	0	1.09575	0	0	0	0	0	0	2.68196	0	1.51995	1.55458	1.80295	0	0.754146	1.72226	0
OTU_469	OTU_469;Bacteria;Firmicutes;Clostridia;Clostridiales;Clostridiaceae;?;?	0	0	0.887072	0	0	0	0	0	0	2.70872	0	0	0	0	1.5968	2.31757	0	2.31279	0	1.14528	0	0	3.88212	1.19749	0	0	0	0	0	3.53409	0	0	0	0	1.72226	0
OTU_470	OTU_470;Bacteria;Proteobacteria;Deltaproteobacteria;Desulfovibrionales;Desulfovibrionaceae;Desulfovibrio;?	0	0	0	0	0	0	0	0	0	0	0	0	0	0	0	0	0	0	0	0	0	0	0	0	0	0	0	0	0.656514	2.42175	2.46487	2.11073	2.81959	0.754146	2.75463	3.02235
OTU_471	OTU_471;Bacteria;Firmicutes;Clostridia;Clostridiales;Ruminococcaceae;?;?	0	0	3.24705	0	0	0	0	0	0	0	0	0	0	0	0	0	0	0	0	0	0	0	0	0	5.12439	0	0	0	0	0	0	0	0	0	0	0
OTU_472	OTU_472;Bacteria;Firmicutes;Clostridia;Clostridiales;Ruminococcaceae;?;?	0	0	0	0	0	0	0	0	1.2893	1.91407	0	0	0	0	2.82256	0	0	0	1.05802	2.21278	0	0.943674	3.07056	1.19749	0	0	0	0	3.35337	0.69831	0.718811	0	0.813487	1.24687	1.72226	1.6496
OTU_473	OTU_473;Bacteria;Actinobacteria;Coriobacteriia;Coriobacteriales;Coriobacteriaceae;Adlercreutzia;?	2.34256	0.848202	2.79617	0	0	0	0	0	0	0	0	0	0	1.6432	3.18569	0	0	2.79756	0	1.14528	0	0	4.16322	1.8427	0.937883	0	0	0	1.44827	0	0	0	0	0	0	0
OTU_474	OTU_474;Bacteria;Verrucomicrobia;Verrucomicrobiae;Verrucomicrobiales;Verrucomicrobiaceae;Akkermansia;muciniphila	0	0	0	0	3.17782	0	2.31809	1.78244	0	0	1.38232	0	3.41028	0	0	0	0	0	0	0	0	0	0	0	1.50153	0	1.24434	1.89089	2.48804	0.69831	1.55458	0	0.813487	2.14834	0.655242	1.27797
OTU_475	OTU_475;Bacteria;Bacteroidetes;Bacteroidia;Bacteroidales;S24-7;?;?	0	0	0	0	0	0	0	0	0	2.70872	0	0	3.65052	0	0	0	0	0	0	0	0	1.50936	0	0	0	0	0	0	0	0	0	0	0	2.97569	3.88724	0
OTU_476	OTU_476;Bacteria;Firmicutes;Bacilli;Bacillales;?;?;?	0	0	0	0	0	0	0	0	0	0	0	4.975	0	0	0	0	0	0	1.05802	0	0	3.47996	2.06069	0	0	0	2.6952	0	0	3.18489	0	0	0	0	0	0
OTU_477	OTU_477;Bacteria;Firmicutes;Clostridia;Clostridiales;?;?;?	0	0	0	5.62203	0	0	0	0	0	0	0	0	0	0	0	0	0	0	0	0	0	0	0	0	0	0	0	0	0	0	0	0	0	0	0	0
OTU_479	OTU_479;Bacteria;Firmicutes;Clostridia;Clostridiales;?;?;?	0	0	0	0	2.00667	0	3.28848	0	0	0	0	0	1.54909	0	0	0	0	0	0	0	0	2.48983	0	0	0.937883	2.58567	0	1.89089	1.44827	0	2.62448	2.57982	0	0	0	0
OTU_480	OTU_480;Bacteria;Firmicutes;Clostridia;Clostridiales;Ruminococcaceae;Ruminococcus;flavefaciens	1.78375	0	1.43234	2.07608	0	0	0	0	0	0	0	0	0	0	2.33612	1.58133	0.966677	0	0	0	1.71126	0	0	0	0	0	0	1.23531	0	1.8034	0.718811	0	1.71033	1.24687	3.64358	0
OTU_481	OTU_481;Bacteria;Proteobacteria;Alphaproteobacteria;?;?;?;?	0	0	0	0	0	0	0	0	0	0	0	0	0	0	0	0	0	0	0	0	0	0	0	0	0	0	0	0	0	0	0	5.26077	0	0	0	0
OTU_483	OTU_483;Bacteria;Verrucomicrobia;Verrucomicrobiae;Verrucomicrobiales;Verrucomicrobiaceae;Akkermansia;?	0	1.76586	0	1.05117	1.59089	2.24658	0.845868	2.82786	0	0	2.89288	0	0	0	0	0	2.94117	1.57735	0	0	0	1.91466	1.04074	0	1.50153	3.00075	1.90235	1.89089	0	0	0	0	0	0	0	0
OTU_484	OTU_484;Bacteria;Bacteroidetes;Bacteroidia;Bacteroidales;Rikenellaceae;?;?	0	2.3223	1.43234	0	2.32904	0	0	0	1.9591	0	0	0	0	0	2.82256	1.58133	0	0	2.08617	0	0	1.91466	2.06069	0	0.937883	1.00043	1.90235	0	1.44827	0	0	3.45382	0	0	0	0
OTU_486	OTU_486;Bacteria;Firmicutes;Clostridia;Clostridiales;?;?;?	1.39441	1.76586	0	0	0	0	1.37556	0	2.76051	0	2.89288	0	0	0	0	0	0	0	0	1.14528	0	0	0	0	0	1.00043	0	1.89089	3.08602	0	2.76817	0	0	0	1.10418	0
OTU_487	OTU_487;Bacteria;Firmicutes;Clostridia;Clostridiales;Clostridiaceae;?;?	0	0	2.39152	1.65279	0	0	0.845868	0	0	0	0	2.41955	0	0	0	0	0	0	0	0	0	0	0	2.28694	0	2.32261	1.24434	0	0.656514	1.16685	0.718811	0.871666	3.10006	1.90556	1.10418	1.6496
OTU_488	OTU_488;Bacteria;Bacteroidetes;Bacteroidia;Bacteroidales;Rikenellaceae;?;?	1.78375	0.848202	2.13674	1.05117	0	2.85651	0	0	0	0	0	0	2.76106	0	0	1.58133	1.94972	0	0	1.77559	2.14134	0	1.04074	0	2.22122	2.00064	0	1.89089	1.44827	1.16685	0	0	0	0	0.655242	0
OTU_490	OTU_490;Bacteria;Firmicutes;Clostridia;Clostridiales;Ruminococcaceae;Oscillospira;?	0	0	0	0	0	0	0	0	0	1.25359	0	1.66677	0	0	0	3.16508	0	0	0	0	0	0	0	0	0	0	0	0	0	2.72321	2.28539	1.80295	1.33051	0.754146	1.44607	3.14362
OTU_491	OTU_491;Bacteria;Bacteroidetes;Bacteroidia;Bacteroidales;Porphyromonadaceae;Parabacteroides;?	0	2.07074	0	0	0	0	0	0	0	0	2.07511	0	3.41028	0	0	0	0	0	0	2.54783	0	3.06822	1.63903	0	0	1.58553	0	2.33998	0	0.69831	1.19639	0	1.71033	0	0	1.94485
OTU_492	OTU_492;Bacteria;Firmicutes;Clostridia;Clostridiales;Ruminococcaceae;Oscillospira;?	2.55739	1.76586	0	0	0	0	0	0	0	0	0	1.66677	0	0	3.18569	0	0	0	2.90543	0	0	1.50936	0	0	0	0	0	0	0	2.42175	0	1.80295	0	0.754146	2.15357	0
OTU_493	OTU_493;Bacteria;Firmicutes;Clostridia;Clostridiales;Ruminococcaceae;Oscillospira;?	2.09004	0	2.60798	0	0	0	0	0	0	1.25359	0	0	0	0	0	3.16508	0	0	1.66181	3.57374	0	0.943674	0	1.19749	1.50153	0	0	0	0	0	0	2.36426	0	0	1.72226	0
OTU_494	OTU_494;Bacteria;Bacteroidetes;Bacteroidia;Bacteroidales;Bacteroidaceae;Bacteroides;?	0	0.848202	1.82711	0	0	1.16898	0	2.55586	1.2893	1.25359	0	2.41955	3.41028	0	0	0	0	0	0	1.14528	0	0	1.63903	0	0	0	0	1.89089	2.48804	1.8034	0	1.41118	0	0	0	1.27797
OTU_495	OTU_495;Bacteria;Firmicutes;Clostridia;Clostridiales;?;?;?	1.78375	0.848202	0	2.40294	0	0	0	0	0	0	2.54118	0	0	3.24706	0	0	1.94972	0	2.90543	1.14528	1.71126	0	1.04074	0	0.937883	0	1.24434	0	0	1.16685	0	1.41118	0.813487	0	1.44607	0
OTU_496	OTU_496;Bacteria;Firmicutes;Clostridia;Clostridiales;Ruminococcaceae;?;?	0	0	0	0	0	0	0	0	0	2.98582	1.38232	0	0	0	4.66087	0	4.10632	0	0	0	0	0	0	0	0	0	0	0	0	0	0	0	1.33051	0	0.655242	0
OTU_497	OTU_497;Bacteria;Firmicutes;Clostridia;Clostridiales;Ruminococcaceae;?;?	0	0	0	0	0	0	0	0	0	0	0	1.66677	0	0	0	0	0	0	0	0	1.09575	1.50936	0	1.19749	0	0	0	0	0	2.24355	2.46487	1.80295	1.33051	1.24687	1.95397	2.74415
OTU_498	OTU_498;Bacteria;Firmicutes;Clostridia;Clostridiales;?;?;?	0	0	0	0	0	0	0.845868	1.15059	0	2.70872	0	0	0	2.88181	0	1.58133	0	0	2.41367	0	0	1.50936	0	0	0	0	0	0	0	2.24355	0	1.41118	0.813487	1.61348	2.62619	0
OTU_499	OTU_499;Bacteria;Firmicutes;Clostridia;Clostridiales;Peptostreptococcaceae;?;?	0	0	0.887072	0	3.00777	4.20784	0	0	2.41475	0	0	0	0	0	0	0	0.966677	0	0	0	1.09575	1.50936	2.06069	0	1.50153	0	0	0	0	0	0	0	0	1.24687	0	0.776097
OTU_500	OTU_500;Bacteria;Firmicutes;Clostridia;Clostridiales;Lachnospiraceae;?;?	1.78375	1.76586	1.82711	2.07608	0	1.16898	0	0	0	0	0	0	0	0	2.82256	0	0	0	3.10005	2.21278	0	1.50936	1.63903	0	0	0	0	0	1.10604	0.69831	1.55458	0	0	0	0	0.776097
OTU_501	OTU_501;Bacteria;Firmicutes;Clostridia;Clostridiales;Ruminococcaceae;Ruminococcus;?	0	0	0	0	0	0	0	0	0	0	0	0	0	0	0	0	0	0	0	0	0	0	0	0	0	0	0	0	0	0.69831	0	4.90891	0	0	0	0
OTU_502	OTU_502;Bacteria;Firmicutes;Clostridia;Clostridiales;?;?;?	2.55739	2.3223	0	0	0	0	0	0	1.9591	0	0	1.66677	0	0	0	0	0	0	3.10005	0	0	1.91466	0	0	0	0	0	0	0	1.16685	1.55458	0	0	0	2.15357	0.776097
OTU_503	OTU_503;Bacteria;Firmicutes;Clostridia;Clostridiales;Lachnospiraceae;Dorea;?	0.859495	0	0	0	0	0	0	0	1.2893	0	0	0	0	0	0	1.58133	0	0	1.05802	0	1.09575	1.91466	2.06069	1.19749	0	0	0	0	0.656514	0	2.08036	0	3.53659	1.24687	1.10418	0
OTU_504	OTU_504;Bacteria;Firmicutes;Clostridia;Clostridiales;?;?;?	0	0	0	4.09449	0	0	0	0	0	0	0	0	0	0	0	0	0	1.57735	0	0	0	0	0	0	0	0	0	0	0	0	3.32791	0.871666	1.33051	1.24687	0	0
OTU_506	OTU_506;Bacteria;Firmicutes;Clostridia;Clostridiales;Ruminococcaceae;?;?	0	0.848202	0	0	0	0	0	0	0	1.25359	0	1.66677	0	1.6432	0	0	0	0	0	0	0	0	0	0	0	0	0	1.23531	0	2.24355	0	1.80295	3.71361	0	0.655242	2.18981
OTU_507	OTU_507;Bacteria;Firmicutes;Clostridia;Clostridiales;Ruminococcaceae;Ruminococcus;flavefaciens	0	0	0	0	0	0	0	0	0	0	0	2.41955	0	0	1.5968	0	1.54036	0	1.66181	2.21278	0	0	0	0	0	0	0	0	0	0	0	2.57982	1.71033	2.53765	2.48518	0.776097
OTU_508	OTU_508;Bacteria;Firmicutes;Clostridia;Clostridiales;Ruminococcaceae;Oscillospira;?	0	0	0	2.07608	0	0	0	0	0	1.91407	0	0	0	0	0	3.69541	0	0	0	0	0	0	0	0	0	0	0	3.18997	0.656514	2.24355	2.08036	1.80295	0	0	1.44607	0
OTU_509	OTU_509;Bacteria;Firmicutes;Clostridia;Clostridiales;Lachnospiraceae;?;?	0.859495	0.848202	0	0	0	0	0	0	0	4.1385	0	0	1.54909	0	0	0	1.54036	0.994296	0	0	0	0.943674	0	1.19749	2.4799	0	0	0	0	0	0	0	0	2.97569	0	0
OTU_510	OTU_510;Bacteria;Actinobacteria;Coriobacteriia;Coriobacteriales;Coriobacteriaceae;Adlercreutzia;?	0	0	0	0	0	0	0	0	0	3.75051	0	0	0	0	1.5968	0	0	2.57544	0	1.77559	1.71126	0	3.07056	3.50427	0	0	0	0	0	0	0	0	0	0	0	0
OTU_511	OTU_511;Bacteria;Actinobacteria;Coriobacteriia;Coriobacteriales;Coriobacteriaceae;Adlercreutzia;?	0	2.53644	0	0	0	0	2.53209	0	0	1.25359	2.89288	3.56987	0	0	0	0	0	0.994296	2.08617	0	0	0	2.06069	0	1.50153	0	0	0	0	0	0.718811	0	0	0	1.10418	0
OTU_512	OTU_512;Bacteria;Firmicutes;Clostridia;Clostridiales;Ruminococcaceae;?;?	0	0	0.887072	1.05117	0	0	0	0	0	0	0	0	0	0	0	0	0	0	3.56324	0	0	1.91466	0	0	0	0	0	0	0	2.58034	2.28539	0	2.01071	0	0	0
OTU_513	OTU_513;Bacteria;Bacteroidetes;Bacteroidia;Bacteroidales;S24-7;?;?	0	0	0	0	0	0	0	0	0	0	0	0	0	0	0	0	0	0	3.56324	0	0	0	0	0	0	0	0	0	0.656514	1.8034	2.46487	0	2.47112	2.14834	0	0
OTU_514	OTU_514;Bacteria;Firmicutes;Bacilli;Bacillales;Bacillaceae;Bacillus;?	0	0	2.96261	0	0	0	0	0	0	0	3.61449	0	0	0	0	0	0	0	3.80579	0	0	0	0	0	0	0	3.20393	0	0	0	0	0	0	0	0	0
OTU_515	OTU_515;Bacteria;Firmicutes;Erysipelotrichi;Erysipelotrichales;Erysipelotrichaceae;Coprobacillus;?	0.859495	0.848202	0	0	0	0	0	0	0	0	0	2.41955	0	1.6432	2.33612	2.80269	0	0	1.05802	3.41888	2.9678	0	1.04074	0	0	1.00043	0	1.23531	0	0	0	0	0	0.754146	0.655242	1.6496
OTU_516	OTU_516;Bacteria;Firmicutes;Clostridia;Clostridiales;Lachnospiraceae;?;?	2.09004	0.848202	0	1.05117	0	0	0	0	0	0	0	0	0	0	0	0	3.26138	0	0	0	1.71126	0	0	0	0.937883	0	0	2.68196	0	0	0.718811	0	2.47112	0	1.10418	1.27797
OTU_517	OTU_517;Bacteria;Firmicutes;Erysipelotrichi;Erysipelotrichales;Erysipelotrichaceae;Allobaculum;?	0	0	0	0	0	0	0	0	0	0	0	0	0	0	0	0	0	0	0	0	0	0	0	0	0	0	0	0	0	2.58034	0	2.36426	0.813487	3.40774	1.10418	1.27797
OTU_518	OTU_518;Bacteria;Firmicutes;Clostridia;SHA-98;?;?;?	0	0	0	1.65279	0	0	1.76215	0	0	2.98582	3.17543	0	0	0	0	0	0	0	0	0	0	0	0	0	0	0	0	0	0	2.0402	1.55458	0	0	0	2.48518	0.776097
OTU_520	OTU_520;Bacteria;Tenericutes;Mollicutes;Anaeroplasmatales;?;?;?	1.78375	2.07074	1.43234	0	0	0	0	0	0	0	1.38232	0	0	0	0	1.58133	0	0	0	0	0	2.23072	0	0	0	0	0	0	1.10604	0	1.84129	2.36426	0	0	0	2.39916
OTU_521	OTU_521;Bacteria;Firmicutes;Clostridia;Clostridiales;Ruminococcaceae;Oscillospira;?	0.859495	0.848202	0	0	0	0	0	0	0	0	0	0	0	0	1.5968	2.80269	1.54036	0.994296	0	0	0	0.943674	1.63903	1.8427	1.50153	0	0	1.23531	0	0.69831	1.19639	0.871666	0.813487	2.35609	1.10418	0.776097
OTU_522	OTU_522;Bacteria;Firmicutes;Bacilli;Lactobacillales;Lactobacillaceae;Lactobacillus;?	0	0	0	0	0	0	0	0	1.2893	2.36543	0	0	2.27877	3.53827	0	0	0.966677	1.57735	0	1.14528	0	0	0	0	0	3.80815	0	1.23531	0	1.16685	0	0	0	0	0	0
OTU_523	OTU_523;Bacteria;Firmicutes;Clostridia;Clostridiales;?;?;?	4.52286	0	0.887072	0	0	0	0	0	0	0	0	0	0	0	0	1.58133	1.54036	0	0	0	0	0	0	0	0	0	0	0	0	0	0	0	0	0	0	0
OTU_524	OTU_524;Bacteria;Firmicutes;Clostridia;Clostridiales;Lachnospiraceae;?;?	0	0	0	0	0	0	0	0	0	0	0	0	0	0	1.5968	0	0	3.57449	2.08617	0	0	0	3.24158	0	0	0	0	1.23531	0	0	2.28539	0	0	0.754146	0	0
OTU_525	OTU_525;Bacteria;Firmicutes;Clostridia;Clostridiales;Ruminococcaceae;?;?	0	0.848202	0	0	0	0	0	0	0	0	1.38232	0	0	0	1.5968	0	0	0	0	0	0	0	0	0	0	0	0	0	0	0.69831	0.718811	3.45382	1.71033	1.90556	2.15357	0
OTU_526	OTU_526;Bacteria;Firmicutes;Clostridia;Clostridiales;Lachnospiraceae;[Ruminococcus];gnavus	2.55739	0.848202	0	0	0	0	0	0	0	1.25359	0	0	0	0	3.47555	0	0	1.99144	3.42473	0	0	0	0	0	0	0	0	0	0	0	0	1.80295	0.813487	0	0.655242	0
OTU_527	OTU_527;Bacteria;Firmicutes;Clostridia;Clostridiales;Ruminococcaceae;?;?	0.859495	0	0	0	0	0	0	0	1.2893	0	0	0	0	0	0	2.31757	0	0	2.90543	0	0	2.70941	0	1.19749	0	0	0	0	0	0	1.19639	0	0.813487	2.35609	0.655242	1.6496
OTU_528	OTU_528;Bacteria;Firmicutes;Clostridia;Clostridiales;?;?;?	0	0	0	0	0	0	0	0	0	1.91407	0	0	0	0	0	0	0	0	0	0	0	0	0	0	0	2.32261	0	0	0	1.51995	2.46487	0.871666	0.813487	2.35609	1.72226	1.27797
OTU_529	OTU_529;Bacteria;Firmicutes;Clostridia;Clostridiales;Ruminococcaceae;?;?	0	0.848202	2.13674	0	0	0	0	0	3.03922	0	0	0	0	0	0	0	0	1.57735	1.05802	0	0	1.50936	0	1.19749	0	0	0	0	0.656514	1.51995	0	0	0	0	0	2.88994
OTU_530	OTU_530;Bacteria;Firmicutes;Clostridia;Clostridiales;?;?;?	0	0	0	0	0	1.16898	0	0	0	0	0	3.278	0	0	0	1.58133	0	0	0	0	0	0	0	0	0	3.58574	0	0	0	0	0	1.41118	0	0	2.32888	1.6496
OTU_531	OTU_531;Bacteria;Firmicutes;Clostridia;Clostridiales;Lachnospiraceae;?;?	0.859495	0	0	2.07608	0	0	0	0	0	1.25359	0	1.66677	0	1.6432	0	0	0	1.57735	1.05802	0	1.09575	2.48983	1.63903	3.131	0	1.00043	0	0	0	0.69831	0	0.871666	0	0	1.10418	0
OTU_534	OTU_534;Bacteria;Firmicutes;Clostridia;Clostridiales;Peptostreptococcaceae;?;?	0	0	1.43234	0	1.59089	2.85651	0	0	1.2893	0	0	0	0	0	0	0	0.966677	0	0	0	2.47222	0	1.04074	2.62612	0	2.00064	1.90235	0	0	0	0	0	0	1.24687	0	1.27797
OTU_535	OTU_535;Bacteria;Firmicutes;Clostridia;Clostridiales;Ruminococcaceae;Oscillospira;?	0.859495	1.76586	0.887072	0	0	0	0	0	0	1.91407	0	0	0	0	0	2.31757	0.966677	0	1.66181	2.54783	0	0	2.87651	1.19749	0.937883	0	0	0	0.656514	0	0	0	0	1.24687	0.655242	0
OTU_536	OTU_536;Bacteria;Firmicutes;Clostridia;Clostridiales;?;?;?	0	0	1.82711	0	0	0	0	0	0	0	0	0	0	0	0	0	0	0	0	1.77559	0	0	0	4.88043	0	0	1.24434	0	0	0	0	0	0	0	0	0
OTU_537	OTU_537;Bacteria;Actinobacteria;Actinobacteria;Actinomycetales;Corynebacteriaceae;Corynebacterium;?	0	0	0	0	0	0	0	0	0	0	0	0	0	0	0	0	0	0	0	0	2.14134	0	4.77779	0	0	0	0	0	0	0	0	0	0	0	0	0
OTU_538	OTU_538;Bacteria;Firmicutes;Clostridia;Clostridiales;?;?;?	0	1.76586	0	2.89399	0	0	0	0	1.2893	0	0	0	0	0	0	4.51835	0.966677	0	0	0	0	0	0	1.19749	2.4799	0	0	0	0	0	0	0	0	0	0	0
OTU_540	OTU_540;Bacteria;Firmicutes;Clostridia;Clostridiales;?;?;?	0	0	0	0	0	0	0	0	0	0	0	0	0	0	3.18569	0	0	0	0	0	0	0	0	0	0	0	0	0	0	0	3.98677	0	0	0	0	0.776097
OTU_541	OTU_541;Bacteria;Firmicutes;Clostridia;Clostridiales;Ruminococcaceae;?;?	0	0	0	2.40294	0	0	0	0	0	0	0	0	0	0	2.33612	0	1.54036	0	0	1.14528	0	0	0	1.8427	1.50153	0	0	2.33998	0	1.8034	2.46487	0.871666	0	0	0	0
OTU_542	OTU_542;Bacteria;Bacteroidetes;Bacteroidia;Bacteroidales;S24-7;?;?	0.859495	0	0.887072	0	0	0	1.37556	0	0	2.36543	0	0	3.41028	0	0	0	0.966677	0	0	1.14528	0	0.943674	1.63903	0	1.50153	0	0	2.68196	1.10604	0	0	0	0.813487	0	0	0.776097
OTU_543	OTU_543;Bacteria;Firmicutes;Clostridia;Clostridiales;Dehalobacteriaceae;Dehalobacterium;?	0.859495	0	0.887072	0	0	0	0	0	1.2893	0	0	0	0	3.53827	0	2.80269	0.966677	0	2.90543	0	0	0	1.04074	3.131	0	0	0	1.23531	0	0	0	0	0	0	0.655242	0
OTU_545	OTU_545;Bacteria;Firmicutes;Clostridia;Clostridiales;Lachnospiraceae;?;?	2.34256	0.848202	0	1.05117	0	0	0	2.55586	0	0	0	0	0	0	2.33612	0	0	0.994296	0	2.21278	0	0.943674	0	0	0	0	0	0	0	0	1.84129	1.80295	0	0.754146	0	0.776097
OTU_547	OTU_547;Bacteria;Firmicutes;Clostridia;Clostridiales;Ruminococcaceae;?;?	0	0	0	0	0	0	0.845868	0	0	0	0	0	0	0	0	0	0.966677	0	0	0	0	3.35533	0	0	0	0	0	0	2.15627	2.58034	0	0	0.813487	0	0	0
OTU_548	OTU_548;Bacteria;Firmicutes;Bacilli;Lactobacillales;Lactobacillaceae;Lactobacillus;reuteri	2.34256	0	0	1.05117	0	0	2.7184	0	0	0	0	0	0	0	0	0	0	0	0	0	0	0	1.04074	0	0	0	0	0	0	0.69831	2.89884	1.41118	0	0	0	0
OTU_549	OTU_549;Bacteria;Firmicutes;Clostridia;Clostridiales;Ruminococcaceae;?;?	0	0	0	2.07608	0	0	0	1.15059	0	1.91407	0	0	0	0	0	0	0	0	0	0	0	0	0	0	0	3.70123	0	0	0	1.16685	2.46487	0	0	0	0	0
OTU_550	OTU_550;Bacteria;Verrucomicrobia;Verrucomicrobiae;Verrucomicrobiales;Verrucomicrobiaceae;Akkermansia;muciniphila	0	0	1.43234	0	2.32904	1.80614	2.53209	2.55586	1.2893	0	0	0	0	0	0	0	1.54036	0	0	0	0	0	0	0	1.50153	1.00043	0	1.89089	0	0	0	0	0	0.754146	0	0
OTU_551	OTU_551;Bacteria;Verrucomicrobia;Verrucomicrobiae;Verrucomicrobiales;Verrucomicrobiaceae;Akkermansia;muciniphila	0	0	0	1.05117	1.00445	0	2.53209	2.82786	0	0	0	0	0	0	0	0	0.966677	0	0	0	1.09575	0	0	0	2.4799	1.00043	0	1.23531	1.72468	0	0	0	0	0.754146	0	0
OTU_552	OTU_552;Bacteria;Firmicutes;Clostridia;Clostridiales;Veillonellaceae;?;?	0	0	0	0	0	0	0	0	0	0	0	0	5.72821	0	0	0	0	0	0	0	0	0	0	0	0	0	0	0	0	0	0	0	0	0	0	0
OTU_553	OTU_553;Bacteria;Deferribacteres;Deferribacteres;Deferribacterales;Deferribacteraceae;Mucispirillum;schaedleri	0.859495	0.848202	0	0	1.00445	0	0	0	0	0	0	0	0	0	0	0	0	2.31279	0	4.06648	2.14134	0	0	0	0	0	0	0	0	0.69831	0	0	0	0	0	1.6496
OTU_554	OTU_554;Bacteria;Bacteroidetes;Bacteroidia;Bacteroidales;Porphyromonadaceae;Parabacteroides;?	1.39441	2.07074	2.13674	0	0	0	2.7184	0	0	0	0	0	0	1.6432	0	2.31757	0	2.31279	0	2.21278	0	0	0	0	0	0	0	0	0	0	0	0	0	0	0	0
OTU_555	OTU_555;Bacteria;Firmicutes;Clostridia;Clostridiales;Peptostreptococcaceae;?;?	0.859495	0.848202	2.79617	0	0	0	0	1.15059	0	0	0	0	0	0	0	0	2.26824	0	0	0	1.09575	1.91466	0	1.8427	0	0	1.24434	0	1.44827	0	1.19639	0	0	0	0	0.776097
OTU_556	OTU_556;Bacteria;Firmicutes;Clostridia;Clostridiales;Lachnospiraceae;?;?	0	0	0	0	0	0	0	0	0	0	0	0	0	0	0	0	0	2.99	0	0	0	0	1.04074	0	3.96822	0	0	0	0	0.69831	0.718811	0	0	0	0	0
OTU_557	OTU_557;Bacteria;Firmicutes;Clostridia;Clostridiales;Lachnospiraceae;?;?	1.39441	0	0	1.65279	0	0	0	0	0	1.25359	0	0	0	0	0	0	0	0	0	0	1.09575	0	0	0	0	1.00043	0	0	0	0	1.84129	1.80295	0	0.754146	1.44607	2.74415
OTU_558	OTU_558;Bacteria;Proteobacteria;Gammaproteobacteria;Enterobacteriales;Enterobacteriaceae;?;?	0	0	0	0	0	1.80614	0	0	0	0	0	0	0	0	0	0	0	0	0	0	4.08077	0.943674	2.38657	1.8427	0	0	0	0	0.656514	0.69831	0	0	0	0.754146	0	0
OTU_559	OTU_559;Bacteria;Firmicutes;Clostridia;Clostridiales;Ruminococcaceae;Oscillospira;?	0	0	0	0	0	0	0	0	0	0	0	0	1.54909	0	1.5968	0	0	0	2.08617	0	0	0.943674	0	0	0	0	0	0	0.656514	2.58034	0	2.76732	0	0	1.44607	0.776097
OTU_560	OTU_560;Bacteria;Firmicutes;Clostridia;Clostridiales;Ruminococcaceae;?;?	0	0	0	0	0	0	0	0	1.2893	0	0	0	0	2.39153	2.33612	0	0	0	1.66181	0	0	1.50936	0	0	0	0	0	0	1.10604	0	2.28539	1.80295	0	1.61348	0	1.6496
OTU_561	OTU_561;Bacteria;Tenericutes;Mollicutes;RF39;?;?;?	0	3.2932	0	0	0	0	0	0	0	0	0	0	0	0	0	0	0	0	0	1.77559	0	0	0	2.28694	0	0	0	0	0	0	0	0	0	0	2.75463	0
OTU_562	OTU_562;Bacteria;Firmicutes;Clostridia;Clostridiales;?;?;?	0	2.07074	0	0	0	0	0	0	0	0	0	0	0	0	0	3.90181	0.966677	0	1.05802	0	0	0	1.04074	0	2.22122	0	0	2.33998	0	0	0	2.36426	0	0	0	0
OTU_563	OTU_563;Bacteria;Firmicutes;Clostridia;Clostridiales;Ruminococcaceae;?;?	2.09004	0.848202	0	1.65279	0	0	0	0	1.2893	0	0	0	0	1.6432	1.5968	0	0	0.994296	2.08617	0	0	0	1.63903	1.8427	0	0	0	0	0	0.69831	1.19639	0	0	1.24687	1.44607	0
OTU_564	OTU_564;Bacteria;Firmicutes;Clostridia;Clostridiales;Lachnospiraceae;?;?	0	0	0	0	0	0	0	0	1.9591	0	0	0	0	0	0	1.58133	0	0	1.66181	0	0	0.943674	0	0	0	0	0	0	0	0	1.55458	0	2.01071	0.754146	2.98159	0
OTU_565	OTU_565;Bacteria;Firmicutes;Clostridia;Clostridiales;Ruminococcaceae;?;?	2.09004	0	0	0	0	0	0	0	1.9591	0	0	0	0	0	0	0	0	0	2.6804	0	0	0	0	1.8427	0	0	0	0	0	0	0.718811	0	0	0.754146	0	3.02235
OTU_566	OTU_566;Bacteria;Firmicutes;Clostridia;Clostridiales;Ruminococcaceae;Ruminococcus;?	0.859495	0	2.79617	0	0	0	0	0	0	0	0	0	0	0	0	0	0	0	2.08617	0	1.09575	0	2.87651	2.90053	0	1.00043	0	0	0	0.69831	0	0	0	0	0	0
OTU_567	OTU_567;Bacteria;Firmicutes;Clostridia;Clostridiales;?;?;?	0	1.76586	0	0	0	0	0	0	0	1.25359	0	0	0	0	0	0	0	0.994296	0	1.14528	0	1.91466	0	1.19749	0	0	0	0	0	1.51995	0	0.871666	0	1.24687	2.32888	1.27797
OTU_568	OTU_568;Bacteria;Firmicutes;Clostridia;Clostridiales;Lachnospiraceae;Dorea;?	0	0	0	0	0	0	0	0	1.2893	0	0	0	0	0	0	0	0	0	0	0	0	0	0	0	0	0	0	2.33998	3.50752	0.69831	0	0.871666	0	0.754146	0	0
OTU_570	OTU_570;Bacteria;Firmicutes;Clostridia;Clostridiales;Ruminococcaceae;?;?	0	0	0	0	0	0	0	0	0	0	0	0	0	0	0	0	0	0	0	0	0	0	0	0	0	0	1.90235	0	0	0	0	4.32803	0	0	0	0
OTU_571	OTU_571;Bacteria;Firmicutes;Clostridia;Clostridiales;Lachnospiraceae;Coprococcus;?	0	0	0	0	0	0	0	0	0	0	0	0	0	0	0	0	0	0	0	0	0	0	0	0	0	0	0	0	0	0	4.04438	0	0	0	0.655242	0
OTU_572	OTU_572;Bacteria;Firmicutes;Clostridia;Clostridiales;Ruminococcaceae;?;?	0.859495	0	0	0	0	0	0	0	0	1.91407	0	0	0	0	0	1.58133	1.94972	0	0	0	0	0	0	0	1.50153	0	0	0	0	0	2.08036	1.80295	0	1.24687	2.15357	0
OTU_573	OTU_573;Bacteria;Bacteroidetes;Bacteroidia;Bacteroidales;[Paraprevotellaceae];[Prevotella];?	0	0	0	0	0	0	0	0	0	0	0	0	0	0	0	0	0	0	0	0	0	0	0	0	0	0	0	0	2.48804	2.42175	0.718811	2.57982	1.33051	0	0.655242	0
OTU_574	OTU_574;Bacteria;Firmicutes;Clostridia;Clostridiales;Clostridiaceae;?;?	0	0	0	0	0	1.80614	2.31809	0	0	0	0	0	1.54909	0	0	0	0	0	0	0	1.09575	0	0	0	3.58359	0	0	0	0	0	0	0.871666	0	1.24687	0	0.776097
OTU_575	OTU_575;Bacteria;Firmicutes;Clostridia;Clostridiales;Christensenellaceae;?;?	0.859495	0	1.82711	0	0	0	0	0	0	0	1.38232	0	0	0	1.5968	0	0.966677	0	2.08617	1.14528	0	0	2.06069	1.8427	0	0	0	0	0	0	0	1.41118	1.71033	0	1.10418	0.776097
OTU_578	OTU_578;Bacteria;Firmicutes;Clostridia;Clostridiales;Lachnospiraceae;Butyrivibrio;?	3.81049	0	0	1.05117	0	0	0	0	0	0	0	1.66677	0	0	0	0	0	1.57735	0	0	0	0	0	0	0	0	0	0	0	0	1.84129	0	0	0	0	0
OTU_579	OTU_579;Bacteria;Firmicutes;Clostridia;Clostridiales;Ruminococcaceae;?;?	1.39441	0	0	0	0	0	0	0	1.9591	0	0	0	1.54909	0	2.82256	0	0	0	0	0	0	2.89994	0	0	0	0	0	0	0	0	0	3.08202	0	0	0	0
OTU_581	OTU_581;Bacteria;Firmicutes;Clostridia;Clostridiales;?;?;?	0	0	0	0	0	0	0	0	0	0	0	0	0	0	0	0	0	0	0	0	0	0.943674	0	0	0.937883	0	0	0	1.44827	1.16685	2.08036	1.41118	1.33051	1.24687	2.15357	0
OTU_582	OTU_582;Bacteria;Firmicutes;Clostridia;Clostridiales;Ruminococcaceae;?;?	0	0	0.887072	0	0	0	0	0	0	0	0	0	0	0	0	0	0	0	0	0	0	0	0	0	0	0	0	0	1.44827	1.8034	1.84129	0.871666	0.813487	1.24687	0	2.74415
OTU_583	OTU_583;Bacteria;Firmicutes;Clostridia;Clostridiales;Ruminococcaceae;?;?	3.05825	0	0	0	0	0	0	0	0	0	0	0	0	2.39153	0	0	0	1.57735	0	0	0	0	0	0	1.50153	0	2.35257	2.95821	0	0	0	0.871666	0	0	0	0
OTU_585	OTU_585;Bacteria;Firmicutes;Clostridia;Clostridiales;Ruminococcaceae;?;?	0	0	0	0	0	0	0	0	0	0	0	0	0	0	2.82256	0	0	0	0	0	2.14134	0	0	0	0	2.32261	0	0	0	0	0	2.93323	0	1.90556	0.655242	0
OTU_588	OTU_588;Bacteria;Firmicutes;Clostridia;Clostridiales;?;?;?	0	0.848202	0	0	0	0	0	0	0	0	0	0	0	0	2.33612	0	0	0	0	0	0	0	0	0	0	0	0	0	0	0	0	0	1.71033	0	3.42934	0
OTU_589	OTU_589;Bacteria;Firmicutes;Clostridia;Clostridiales;?;?;?	0.859495	0	0.887072	0	0	0	0	0	0	2.36543	0	0	0	0	0	0	0	0	0	0	0	3.7999	0	0	0	0	0	0	0	0	0	0	0	1.90556	0	0
OTU_590	OTU_590;Bacteria;Firmicutes;Clostridia;Clostridiales;Lachnospiraceae;?;?	0	0	0	1.05117	0	0	0	0	1.2893	0	0	0	0	0	0	0	0	1.57735	0	0	0	0	0	0	0	0	0	0	2.98463	0.69831	0	1.41118	0	0.754146	1.10418	0.776097
OTU_591	OTU_591;Bacteria;Firmicutes;Clostridia;Clostridiales;Ruminococcaceae;?;?	0	0	0.887072	0	0	0	0	0	0	0	0	0	0	0	0	2.80269	0	0	0	1.77559	0	1.50936	0	0	0	2.00064	0	0	0	2.97244	0	0	0	0	0	0.776097
OTU_592	OTU_592;Bacteria;Firmicutes;Clostridia;Clostridiales;?;?;?	0	0	0	0	0	0	0	0	0	0	0	0	0	0	0	0	0	0	0	0	0	0	0	0	0	0	0	0	0.656514	0	0	0	0	0	3.77055	0
OTU_593	OTU_593;Bacteria;Firmicutes;Clostridia;Clostridiales;Ruminococcaceae;Oscillospira;?	1.78375	2.3223	0	0	0	0	0.845868	0	0	0	0	0	0	0	0	0	0	0	1.05802	0	0	1.91466	0	0	0	0	0	0	1.72468	0.69831	0	0	0	0	1.72226	0
OTU_594	OTU_594;Bacteria;Proteobacteria;Gammaproteobacteria;Enterobacteriales;Enterobacteriaceae;?;?	0	1.76586	2.79617	0	0	0	0	0	0	0	0	0	0	0	0	2.80269	0	0	0	0	1.09575	1.50936	2.06069	0	0	0	0	2.33998	0	0	0	0	0	0	0	0
OTU_595	OTU_595;Bacteria;Firmicutes;Clostridia;Clostridiales;Ruminococcaceae;?;?	0	0.848202	2.60798	0	0	0	0	0	1.9591	0	1.38232	0	0	0	0	2.80269	0	0.994296	0	0	0	0	2.06069	0	0.937883	0	0	0	0.656514	0.69831	0	0	0	0	0	1.27797
OTU_596	OTU_596;Bacteria;Firmicutes;Clostridia;Clostridiales;Ruminococcaceae;?;?	0	0.848202	0	0	0	0	0	0	0	0	1.38232	0	0	0	0	0	0	0	2.08617	0	1.09575	0	0	1.19749	0	0	1.24434	0	1.95656	0	1.55458	1.41118	0.813487	0.754146	1.10418	0
OTU_597	OTU_597;Bacteria;Firmicutes;Clostridia;Clostridiales;Ruminococcaceae;?;?	1.39441	0	1.43234	0	0	0	0	0	0	0	0	0	0	3.53827	3.18569	2.31757	0	0	0	2.21278	2.14134	0	0	1.19749	0	0	0	0	0	0	0	0	0	0	0	0
OTU_598	OTU_598;Bacteria;Firmicutes;Clostridia;Clostridiales;Lachnospiraceae;Coprococcus;?	1.39441	0	0.887072	0	0	0	0	0	0	0	0	0	0	0	0	0	0	0.994296	0	0	1.71126	0	0	2.62612	0	0	0	0	0	0.69831	0.718811	0.871666	2.47112	0	1.44607	0
OTU_599	OTU_599;Bacteria;Firmicutes;Clostridia;Clostridiales;Christensenellaceae;?;?	0	0	0	0	0	0	0	0	0	0	0	0	0	0	0	0	0	0	0	0	0	2.70941	0	0	0	0	0	0	0	2.24355	1.84129	2.36426	0.813487	0	0	0
OTU_600	OTU_600;Bacteria;Firmicutes;Clostridia;Clostridiales;?;?;?	2.34256	0.848202	0	1.05117	0	0	0	0	0	0	0	0	0	0	0	0	0	0	0	0	0	0	0	0	0	0	0	0	0	0	1.19639	0	2.2592	1.90556	1.10418	1.27797
OTU_601	OTU_601;Bacteria;Firmicutes;Clostridia;Clostridiales;Ruminococcaceae;Oscillospira;?	0	0	0	0	0	0	0.845868	0	0	0	0	0	0	0	0	0	0	0	0	0	0	0	0	0	0	0	0	4.87974	0	0	0	0	0	0	0	0
OTU_602	OTU_602;Bacteria;Firmicutes;Clostridia;Clostridiales;Ruminococcaceae;Oscillospira;?	0	0.848202	1.43234	0	0	0	1.76215	0	0	0	0	0	0	0	0	1.58133	0	0	0	0	0	0	2.38657	0	0	0	0	0	0	2.8532	0	0.871666	0	0	0	0
OTU_604	OTU_604;Bacteria;Firmicutes;Clostridia;Clostridiales;Ruminococcaceae;Oscillospira;?	0	0	1.43234	0	0	0	0	0	0	0	0	1.66677	0	0	2.33612	0	0.966677	0.994296	0	0	0	2.48983	1.04074	0	0.937883	1.00043	1.24434	0	1.44827	0.69831	0.718811	0	0	0	0	0
OTU_605	OTU_605;Bacteria;Firmicutes;Bacilli;Bacillales;Bacillaceae;Bacillus;coagulans	0	0	0	0	0	0	0	0	0	0	0	0	0	0	0	0	0	0	0	0	0	0	0	0	0	0	0	0	0.656514	1.16685	1.55458	2.36426	1.71033	0.754146	1.72226	1.27797
OTU_608	OTU_608;Bacteria;Bacteroidetes;Bacteroidia;Bacteroidales;S24-7;?;?	0	0	0	0	0	0	0	0	0	0	0	0	0	0	0	0	0	0	0	0	0	0	0	0	0	0	0	1.89089	0	2.8532	0	0	0	0.754146	2.48518	0
OTU_609	OTU_609;Bacteria;Firmicutes;Clostridia;Clostridiales;Ruminococcaceae;Oscillospira;?	0	0	0	0	0	0	0	0	0	2.36543	0	1.66677	1.54909	0	0	1.58133	0	0.994296	2.90543	0	0	0	1.63903	1.8427	0.937883	0	0	0	0	0	0	0	0	0	0	1.6496
OTU_610	OTU_610;Bacteria;Firmicutes;Clostridia;Clostridiales;Ruminococcaceae;?;?	1.78375	1.3788	0.887072	1.05117	0	0	0	0	0	0	2.89288	1.66677	0	0	0	0	0.966677	0	1.05802	0	0	0	0	0	0	0	0	0	0	0	0	1.41118	0.813487	0	1.10418	1.27797
OTU_611	OTU_611;Bacteria;Firmicutes;Clostridia;Clostridiales;Ruminococcaceae;?;?	0	0	0	0	0	0	0	0	0	0	0	0	0	0	0	0	0	0	0	0	0	0	0	0	0	0	0	0	0	1.51995	2.08036	0	2.2592	1.24687	1.44607	1.6496
OTU_612	OTU_612;Bacteria;Firmicutes;Clostridia;Clostridiales;Lachnospiraceae;Dorea;?	0.859495	0.848202	0	0	0	0	0	0	0	0	0	0	0	0	0	0	0	0	0	2.21278	0	0	0	0	0	0	0	3.18997	0	1.16685	0	0	1.33051	0	1.72226	1.27797
OTU_613	OTU_613;Bacteria;Firmicutes;Clostridia;Clostridiales;Ruminococcaceae;?;?	0	0	0	0	0	0	0	0	0	0	0	0	0	0	0	0	0	0	0	0	0	0	0	0	0	0	0	0	0	0	0	4.13713	0	0	0	0
OTU_614	OTU_614;Bacteria;Verrucomicrobia;Verrucomicrobiae;Verrucomicrobiales;Verrucomicrobiaceae;Akkermansia;muciniphila	0	0	0	0	0	0	0	0	0	0	0	0	0	0	0	0	0	0	0	0	0	0	0	0	0	0	0	0	1.72468	0.69831	2.08036	0	1.33051	2.53765	0	0.776097
OTU_616	OTU_616;Bacteria;Firmicutes;Clostridia;Clostridiales;Peptococcaceae;rc4-4;?	0	0	0	0	0	0	0	2.55586	1.2893	0	0	0	0	0	0	0	0	0	1.05802	0	0	0	0	0	0	1.00043	0	0	0	0	2.08036	0	0	0.754146	0	2.58194
OTU_617	OTU_617;Bacteria;Bacteroidetes;Bacteroidia;Bacteroidales;S24-7;?;?	0	0	0	0	0	1.80614	0	0	0	0	0	1.66677	0	0	0	0	0	0	1.05802	0	0	0.943674	0	0	0	0	0	0	0	0	2.89884	0	0	0	0.655242	1.94485
OTU_619	OTU_619;Bacteria;Firmicutes;Clostridia;Clostridiales;[Mogibacteriaceae];?;?	0	0	0	0	0	0	0	0	0	0	1.38232	0	0	0	0	0	0	0	0	0	0	0	0	0	0	0	0	0	0	0	0	3.21688	0	1.61348	2.15357	0
OTU_620	OTU_620;Bacteria;Firmicutes;Clostridia;Clostridiales;Peptostreptococcaceae;?;?	0	0	0	0	0	0	0	0	0	0	1.38232	0	1.54909	0	0	0	0.966677	0	0	0	1.71126	1.50936	0	0	0	0	0	0	0	0	2.28539	0	0	2.14834	0.655242	0.776097
OTU_621	OTU_621;Bacteria;Bacteroidetes;Bacteroidia;Bacteroidales;S24-7;?;?	0	0	0	0	0	0	0	0	0	0	0	0	2.76106	0	0	0	0	0	0	0	0	2.48983	0	0	0	0	0	1.23531	0	1.16685	0	0	0	2.14834	1.72226	0
OTU_622	OTU_622;Bacteria;Proteobacteria;Betaproteobacteria;Burkholderiales;Oxalobacteraceae;?;?	0	1.3788	0	1.05117	0	0	0	0	0	0	0	0	0	1.6432	0	0	0	0	0	3.41888	0	1.50936	0	0	0	1.00043	2.97187	0	0	0	0	0	0	0	0	0
OTU_623	OTU_623;Bacteria;Firmicutes;Clostridia;Clostridiales;Dehalobacteriaceae;Dehalobacterium;?	4.04209	0	0	0	0	0	0	0	0	0	0	0	0	0	0	0	0	0	0	0	0	0	0	0	0	0	0	0	0	0	0	0	0	0	0	0
OTU_624	OTU_624;Bacteria;Firmicutes;Bacilli;Lactobacillales;Enterococcaceae;Enterococcus;casseliflavus	0	0.848202	0	1.65279	0	0	0	0	0	1.91407	0	0	0	1.6432	0	0	0	0	0	0	0	3.06822	0	2.90053	0	0	0	0	0	0	0	0	0	0	0	0
OTU_625	OTU_625;Bacteria;Tenericutes;Mollicutes;RF39;?;?;?	0	0	0	0	0	0	0	0	0	2.36543	0	0	0	0	0	0	0	0	0	0	0	0	0	0	0	0	0	0	0	1.51995	0	0	1.71033	2.97569	0	0
OTU_626	OTU_626;Bacteria;Firmicutes;Clostridia;Clostridiales;Lachnospiraceae;?;?	1.39441	0	0	0	0	0	0	0	0	0	0	0	1.54909	0	0	1.58133	0	0	0	0	0	0	0	0	0	1.00043	0	0	0.656514	2.24355	0	1.41118	0	0.754146	0	1.94485
OTU_627	OTU_627;Bacteria;Tenericutes;Mollicutes;RF39;?;?;?	0	0	1.43234	0	0	0	0	0	0	0	0	0	0	0	0	0	0	0	0	0	0	1.50936	0	0	0.937883	0	1.90235	4.10867	0	0	0	0	0	0	0	0
OTU_628	OTU_628;Bacteria;Firmicutes;Clostridia;Clostridiales;Lachnospiraceae;Dorea;?	0.859495	0	0	0	0	0	0	0	0	1.25359	0	0	0	0	0	0	0	0	0	0	0	0	0	0	0	0	0	0	3.08602	0	0	0.871666	0	0	0	1.6496
OTU_629	OTU_629;Bacteria;Firmicutes;Clostridia;Clostridiales;Lachnospiraceae;Coprococcus;?	0	0.848202	0	0	0	0	0	0	0	0	0	1.66677	0	0	0	1.58133	0	2.31279	1.66181	1.14528	0	0	0	0	0	1.00043	0	0	0	0.69831	0	0	0.813487	0.754146	0	2.18981
OTU_630	OTU_630;Bacteria;Firmicutes;Clostridia;Clostridiales;?;?;?	0	0	2.60798	0	0	0	0	0	0	0	0	0	0	0	0	0	0	0	0	0	0	0	0	0	0	0	0	0	0	0	0	0	0	2.35609	2.32888	0
OTU_631	OTU_631;Bacteria;Firmicutes;Clostridia;Clostridiales;?;?;?	1.39441	0	0	0	1.00445	2.24658	0	0	2.76051	0	0	0	0	1.6432	0	0	0	0	0	1.14528	0	0.943674	0	0	0	1.00043	0	0	0	1.8034	0	0	0	0	0	0.776097
OTU_632	OTU_632;Bacteria;Firmicutes;Clostridia;Clostridiales;Ruminococcaceae;?;?	0.859495	0	0.887072	0	0	0	0	0	0	0	0	1.66677	0	0	0	0	0	0	0	1.14528	0	1.50936	0	0	0.937883	0	0	0	0.656514	0.69831	1.55458	1.41118	0	0.754146	1.44607	0.776097
OTU_633	OTU_633;Bacteria;Firmicutes;Clostridia;Clostridiales;?;?;?	0	0	0	0	0	0	0	0	0	0	0	0	0	0	0	0	0	4.31107	0	0	0	0	0	0	0	0	0	0	0	0	0	0	0	0	0	0
OTU_634	OTU_634;Bacteria;Firmicutes;Clostridia;Clostridiales;?;?;?	0	0	0	4.34338	0	0	0	0	0	0	0	0	0	0	0	0	0	0	0	0	0	0	0	0	0	0	0	0	0	0	0	0	0	0	0.655242	0
OTU_635	OTU_635;Bacteria;Tenericutes;Mollicutes;Anaeroplasmatales;Anaeroplasmataceae;?;?	0	0.848202	0	1.65279	0	0	0	0	0	0	2.07511	1.66677	0	0	0	1.58133	0	0	0	0	0	0	0	1.19749	0.937883	2.00064	0	2.68196	0	0	0	0	1.33051	0	0	0
OTU_637	OTU_637;Bacteria;Firmicutes;Clostridia;Clostridiales;Ruminococcaceae;Oscillospira;?	0.859495	1.3788	0.887072	0	0	0	0	0	0	0	0	0	0	0	0	0	0	0	2.90543	1.77559	0	1.50936	1.63903	0	0	0	0	0	0	1.16685	0	0	0	0	0	0
OTU_638	OTU_638;Bacteria;Tenericutes;Mollicutes;RF39;?;?;?	0	0	0	1.65279	0	0	0	0	0	0	0	0	0	0	0	0	0	3.31165	0	0	1.09575	0	0	0	0	0	0	0	0	0	0	2.11073	1.33051	0	0	0
OTU_640	OTU_640;Bacteria;Firmicutes;Clostridia;Clostridiales;Ruminococcaceae;?;?	0	0	0	0	0	0	0	0	0	1.25359	0	0	0	0	0	0	0	3.15977	1.05802	0	0	0.943674	0	1.19749	0	0	0	0	0	0	0	0	0	0	0.655242	2.18981
OTU_641	OTU_641;Bacteria;Bacteroidetes;Bacteroidia;Bacteroidales;S24-7;?;?	0	0	0	0	0	0	0	0	0	0	0	0	0	0	0	0	0	0	0	0	0	0	0	0	0	0	0	0	1.10604	1.51995	1.84129	0.871666	1.33051	0	1.44607	1.6496
OTU_643	OTU_643;Bacteria;Firmicutes;Clostridia;Clostridiales;?;?;?	0	0	0	0	0	0	0	0	0	0	0	0	0	0	0	1.58133	0	0	2.41367	0	0	2.89994	0	0	0	0	0	2.95821	0	0.69831	0	0	0	0	0	0
OTU_644	OTU_644;Bacteria;Bacteroidetes;Bacteroidia;Bacteroidales;S24-7;?;?	0	0	0	0	0	0	0	0	0	0	0	0	0	0	0	0	0	0	0	0	0	0	0	0	0	0	0	1.23531	0	0	0	0	0	3.66366	0	0
OTU_645	OTU_645;Bacteria;Firmicutes;Clostridia;Clostridiales;Ruminococcaceae;Ruminococcus;?	1.39441	0	0	0	0	0	0	0	0	1.25359	0	3.278	0	0	0	0	0	0	0	0	1.09575	2.70941	0	0	0	0	0	1.89089	0	1.16685	0	0	0	0	0	0
OTU_646	OTU_646;Bacteria;Firmicutes;Bacilli;Bacillales;Bacillaceae;Bacillus;oleronius	0	0	0	0	0	0	0	0	0	0	0	0	0	0	0	0	0	0	0	0	0	0	0	0	0	0	0	0	0	3.60962	0	0	0	0	0	0
OTU_647	OTU_647;Bacteria;Tenericutes;Mollicutes;RF39;?;?;?	0	0	0	0	0	0	0	0	0	0	0	0	0	1.6432	0	0	0	1.57735	0	0	0	0	0	0	0.937883	0	0	0	0	0	0	3.65728	0	0	0	0
OTU_648	OTU_648;Bacteria;Firmicutes;Clostridia;Clostridiales;?;?;?	0	0.848202	0	0	0	0	0	0	0	0	0	0	0	0	0	0	0	0	0	0	0	0	0	0	0	0	2.97187	0	0	0	0.718811	3.21688	0	0	0.655242	0
OTU_650	OTU_650;Bacteria;Firmicutes;Clostridia;Clostridiales;Ruminococcaceae;?;?	0.859495	0	1.43234	0	0	0	0	0	0	1.25359	0	0	0	0	0	2.31757	0	0	1.05802	1.14528	0	0	3.07056	0	0	0	0	0	0	0.69831	0	0	0	0	0	1.27797
OTU_651	OTU_651;Bacteria;Firmicutes;Bacilli;Lactobacillales;Lactobacillaceae;?;?	0	0	0	0	0	0	0	0	0	0	0	0	0	0	0	0	0	0	0	0	0	0	0	0	0	0	0	0	1.10604	2.58034	1.19639	0	1.33051	1.24687	1.10418	0
OTU_654	OTU_654;Bacteria;Firmicutes;Clostridia;Clostridiales;Ruminococcaceae;?;?	0	0	0	0	0	0	0	0	0	0	0	1.66677	0	0	0	0	0	0.994296	0	0	0	0	0	0	0	2.32261	0	0	0	0	1.55458	0	0.813487	1.90556	1.10418	0.776097
OTU_656	OTU_656;Bacteria;Firmicutes;Clostridia;Clostridiales;Christensenellaceae;?;?	0	0.848202	0.887072	0	0	0	0	0	0	0	0	0	0	0	0	0	0	0	1.05802	0	2.14134	0	3.39445	0	0	0	0	1.89089	0	0	0	0	0	0	0	0
OTU_657	OTU_657;Bacteria;Bacteroidetes;Bacteroidia;Bacteroidales;S24-7;?;?	0	0	0	0	0	0	0	0	0	0	0	0	0	0	0	0	0	0	0	0	0	0	0	0	0	1.58553	0	0	0	0	2.62448	1.80295	0	0.754146	0.655242	1.27797
OTU_658	OTU_658;Bacteria;Firmicutes;Clostridia;Clostridiales;Ruminococcaceae;?;?	0	0	0	1.65279	0	0	0	0	0	0	0	0	0	0	2.33612	0	0	0	0	0	0	0	0	0	0	0	0	0	0	2.24355	0	0	1.33051	0	0.655242	1.94485
OTU_660	OTU_660;Bacteria;Firmicutes;Clostridia;Clostridiales;Christensenellaceae;?;?	0	0	0	0	0	0	0	0	0	0	0	0	0	0	0	0	0	0	0	0	0	0	0	4.5228	0	0	0	0	0	0	0	0	0	0	0	0
OTU_661	OTU_661;Bacteria;Firmicutes;Clostridia;Clostridiales;?;?;?	1.39441	0.848202	0.887072	0	0	0	0	2.82786	0	0	0	0	0	0	0	0	0	0	0	0	0	0.943674	1.63903	0	0	0	0	0	1.44827	0.69831	0	0	0	0	0	0.776097
OTU_662	OTU_662;Bacteria;Tenericutes;Mollicutes;RF39;?;?;?	0	0	0	0	0	0	0	0	0	0	0	0	0	0	0	0	0	0	0	0	0	0	0	0	0	0	0	0	0	0	3.58244	0	0	0	0	0
OTU_663	OTU_663;Bacteria;Verrucomicrobia;Verrucomicrobiae;Verrucomicrobiales;Verrucomicrobiaceae;Akkermansia;muciniphila	0	0	0	0	0	0	0	0	0	0	0	0	0	0	0	0	0	0	0	0	0	0	0	0	0	0	0	0	2.48804	0	2.62448	0	0.813487	0	0	0
OTU_664	OTU_664;Bacteria;Firmicutes;Clostridia;Clostridiales;Ruminococcaceae;?;?	0	2.3223	0	0	0	0	0	0	0	0	0	0	0	0	0	0	0	0	0	0	0	0	0	0	0	0	1.24434	0	0	0	0	3.21688	0	0	0.655242	0
OTU_665	OTU_665;Bacteria;Bacteroidetes;Bacteroidia;Bacteroidales;S24-7;?;?	0	0.848202	1.82711	0	0	0	0.845868	0	0	0	1.38232	0	2.27877	0	0	0	0	0	0	0	0	0	0	0	1.50153	0	0	2.33998	0	1.51995	0	0	0	0	0	0
OTU_666	OTU_666;Bacteria;Firmicutes;Clostridia;Clostridiales;Ruminococcaceae;Ruminococcus;flavefaciens	0	0	0	0	0	0	0	0	0	0	0	0	0	0	0	0	0	0	0	0	0	0	0	0	0	0	0	0	0	1.16685	0.718811	0	1.33051	0	2.87257	0
OTU_668	OTU_668;Bacteria;Proteobacteria;Alphaproteobacteria;Rhizobiales;Bradyrhizobiaceae;?;?	0	0	2.39152	0	0	1.80614	0	0	1.9591	0	0	0	0	0	0	0	1.94972	0	0	0	0	0	1.04074	1.19749	0	0	0	0	0	0	0	0.871666	0	0.754146	0	0
OTU_671	OTU_671;Bacteria;Bacteroidetes;Bacteroidia;Bacteroidales;S24-7;?;?	0	0	0	0	0	0	0	0	0	0	0	0	0	0	0	0	0	0	0	0	0	0	0	0	0	0	0	0	0	0	1.84129	2.36426	2.01071	1.24687	0	0.776097
OTU_672	OTU_672;Bacteria;Firmicutes;Clostridia;Clostridiales;?;?;?	0	0	0	0	0	0	0	0	0	0	0	0	0	0	0	0	0	0	0	0	0	0	0	0	0	0	0	0	0	0	2.46487	1.41118	0	0	2.32888	0
OTU_673	OTU_673;Bacteria;Firmicutes;Clostridia;Clostridiales;Peptostreptococcaceae;?;?	1.39441	0	1.43234	1.05117	0	1.16898	0	0	0	0	0	0	1.54909	0	0	0	0.966677	0	0	0	0	0	0	0	0	1.00043	0	0	0	0	0	0	1.33051	0.754146	1.44607	0.776097
OTU_674	OTU_674;Bacteria;Firmicutes;Clostridia;Clostridiales;?;?;?	0	0	0	0	0	0	0.845868	0	0	0	0	0	0	0	0	0	0	0	0	0	0	0	0	1.19749	0	0	0	0	0	0	0	0	2.96663	0	1.95397	0
OTU_675	OTU_675;Bacteria;Bacteroidetes;Bacteroidia;Bacteroidales;Rikenellaceae;?;?	0	0.848202	1.43234	2.07608	0	0	0	0	0	0	0	0	0	0	0	0	1.94972	0	0	0	0	0	0	0	0.937883	1.00043	1.24434	1.23531	1.44827	0	0	0	0	0	0	0
OTU_676	OTU_676;Bacteria;Firmicutes;Clostridia;Clostridiales;Ruminococcaceae;?;?	0	0	0	0	0	0	0	0	0	0	0	0	0	0	2.33612	0	0	0	0	0	0	1.91466	0	0	0.937883	2.32261	0	0	0	0	0	0	2.01071	0	0.655242	0.776097
OTU_677	OTU_677;Bacteria;Firmicutes;Clostridia;Clostridiales;Ruminococcaceae;Oscillospira;?	0	1.76586	0	0	0	0	0	0	0	0	0	0	0	0	0	0	0	1.99144	0	0	0	1.50936	1.63903	0	0	0	0	0	0	0	0	0	0	1.24687	0.655242	1.6496
OTU_679	OTU_679;Bacteria;Firmicutes;Clostridia;Clostridiales;Ruminococcaceae;?;?	0	0	0	0	0	0	0	0	0	0	0	0	0	0	0	0	0.966677	0	2.41367	0	0	0	0	0	0	0	0	0	0	0	0	3.21688	0	0	0	0
OTU_680	OTU_680;Bacteria;Firmicutes;Clostridia;Clostridiales;Ruminococcaceae;Ruminococcus;flavefaciens	0	0	0	0	0	0	0	0	1.9591	1.25359	0	0	0	0	0	0	0	0	0	0	0	0	0	0	0	0	0	1.89089	0	0	1.55458	0	0	0	2.32888	0
OTU_681	OTU_681;Bacteria;Firmicutes;Clostridia;Clostridiales;Ruminococcaceae;?;?	0	0	0	0	0	0	0	0	0	0	0	0	0	0	0	0	0	0	0	1.14528	0	0	0	0	0	0	0	0	0	2.0402	1.55458	0	0.813487	0	1.44607	1.27797
OTU_683	OTU_683;Bacteria;Firmicutes;Clostridia;Clostridiales;Lachnospiraceae;Roseburia;faecis	2.09004	0.848202	0	0	0	0	0	0	1.2893	0	0	0	1.54909	0	2.82256	0	0	0	0	1.77559	0	0	0	0	0	0	0	1.23531	0	1.16685	0	0	0	0	0	0
OTU_684	OTU_684;Bacteria;Firmicutes;Clostridia;Clostridiales;Ruminococcaceae;?;?	1.39441	0	0	0	0	0	0	0	1.9591	0	0	0	0	1.6432	0	1.58133	0	0	0	0	1.09575	0	0	0	0	0	0	0	0	0	0	2.57982	0	1.24687	0	0
OTU_686	OTU_686;Bacteria;Firmicutes;Clostridia;Clostridiales;Ruminococcaceae;Oscillospira;?	0.859495	0	0.887072	1.65279	0	0	0	0	0	0	0	0	0	0	2.82256	0	0	0	0	0	0	0	0	0	0.937883	0	0	0	0	0	1.19639	0	0	0	1.95397	0
OTU_687	OTU_687;Bacteria;Firmicutes;Clostridia;Clostridiales;Ruminococcaceae;Oscillospira;?	0	0.848202	0	0	0	0	0	0	0	1.25359	2.89288	0	0	0	1.5968	1.58133	0	0	0	0	0	0	0	0	0	0	0	0	0	0.69831	0	0	0	0	0	2.39916
OTU_689	OTU_689;Bacteria;Firmicutes;Clostridia;Clostridiales;Ruminococcaceae;Oscillospira;?	0.859495	0	0	1.05117	0	0	0	0	0	0	0	0	0	0	1.5968	0	0	0	3.27151	0	0	0	0	0	0	0	0	0	0	1.51995	0.718811	0	0	0	0	0
OTU_690	OTU_690;Bacteria;Bacteroidetes;Bacteroidia;Bacteroidales;?;?;?	0	0	1.43234	0	0	1.16898	0	0	0	0	0	0	0	0	0	0	0	0	0	0	0	1.50936	0	0	0	0	0	0	1.10604	1.51995	1.19639	1.80295	0	0	0	0
OTU_691	OTU_691;Bacteria;Firmicutes;Clostridia;Clostridiales;Lachnospiraceae;?;?	0.859495	0	0	1.05117	0	0	0	0	0	0	0	0	0	0	1.5968	0	0	1.57735	0	0	0	0	0	0	0	0	0	2.68196	0	0	0.718811	0	1.33051	0	1.44607	0
OTU_692	OTU_692;Bacteria;Actinobacteria;Coriobacteriia;Coriobacteriales;Coriobacteriaceae;Atopobium;?	0	0	0	0	0	0	0	0	0	0	0	0	0	0	0	0	0	0	0	0	0	0	0	0	0	0	0	0	0.656514	3.08257	0	0	0	0.754146	0.655242	0
OTU_693	OTU_693;Bacteria;Firmicutes;Clostridia;Clostridiales;Ruminococcaceae;?;?	0	0	0	0	0	0	0	0	0	0	0	0	0	0	0	0	0	0	0	0	0	0	0	0	0	0	0	0	0.656514	0	2.28539	0	1.71033	1.24687	1.10418	0.776097
OTU_694	OTU_694;Bacteria;Tenericutes;Mollicutes;RF39;?;?;?	0	0	0	4.09449	0	0	0	0	0	0	0	0	0	0	0	0	0	0	0	0	0	0	0	0	0	0	0	0	0	0	0	0	0	0	0	0
OTU_695	OTU_695;Bacteria;Firmicutes;Clostridia;Clostridiales;Lachnospiraceae;Roseburia;?	0	0.848202	0	0	0	0	0	0	2.76051	0	0	0	0	0	0	0	0	0	0	1.14528	0	0	0	0	0	0	0	0	1.10604	0	0	0	0	1.24687	1.72226	0.776097
OTU_696	OTU_696;Bacteria;Firmicutes;Clostridia;Clostridiales;Ruminococcaceae;?;?	0	0	0	0	0	0	0	0	0	0	0	0	2.76106	0	0	0	0	0	0	0	0	0.943674	1.04074	0	0	0	0	0	0	0.69831	0	0	0	2.53765	0	1.27797
OTU_700	OTU_700;Bacteria;Bacteroidetes;Bacteroidia;Bacteroidales;S24-7;?;?	0	0	0	0	0	0	0	0	0	0	0	0	0	0	0	0	0	0	0	0	0	1.50936	0	0	0	0	0	0	0	0.69831	0	0	0	0.754146	2.75463	0
OTU_702	OTU_702;Bacteria;Firmicutes;Clostridia;Clostridiales;Ruminococcaceae;Oscillospira;?	0.859495	0	0	1.05117	0	0	0.845868	0	0	0	0	2.41955	0	0	0	1.58133	0	0	0	0	0	0	2.65224	0	0	0	0	0	0.656514	0	0	0	0	1.24687	0	0
OTU_703	OTU_703;Bacteria;Bacteroidetes;Bacteroidia;Bacteroidales;Porphyromonadaceae;Parabacteroides;?	0	0	1.82711	0	0	0	0	0	2.41475	1.91407	2.89288	0	0	0	0	2.31757	0	0	0	0	0	0	0	0	0	0	0	0	0	0	0	0	0	0	0	0
OTU_705	OTU_705;Bacteria;Firmicutes;Clostridia;Clostridiales;Christensenellaceae;?;?	0	0	0	0	0	0	0	0	0	0	0	0	0	0	0	0	0	1.57735	0	0	0	0	0	3.50427	1.50153	0	1.90235	0	0	0	0	0	0	0	0	0
OTU_706	OTU_706;Bacteria;Firmicutes;Clostridia;Clostridiales;?;?;?	0	0	0	0	1.00445	0	0	0	0	0	0	0	0	0	0	0	0	0	0	0	0	1.91466	1.04074	0	0	0	0	0	1.10604	0.69831	0	0	0	2.14834	0	0.776097
OTU_707	OTU_707;Bacteria;Firmicutes;Clostridia;Clostridiales;Lachnospiraceae;Coprococcus;?	0.859495	0	0	0	0	0	0	0	0	0	0	0	0	0	0	0	0	0	0	0	0	0	0	0	0	0	0	0	0	0	0	3.45382	0	0	0.655242	0
OTU_708	OTU_708;Bacteria;Firmicutes;Clostridia;Clostridiales;Ruminococcaceae;?;?	0	0	0	0	0	0	0	0	0	4.1385	0	0	0	0	0	0	0	0	0	0	0	0	0	1.8427	0	0	0	0	0	0	0	0	0	0	0	0
OTU_710	OTU_710;Bacteria;Firmicutes;Clostridia;Clostridiales;Ruminococcaceae;?;?	0	0	0	0	0	0	0	0	0	0	0	0	0	0	0	0	0	0	0	0	0	0	0	0	0	0	0	0	0	0	3.23201	0.871666	0	0	0	0
OTU_711	OTU_711;Bacteria;Firmicutes;Clostridia;Clostridiales;Ruminococcaceae;?;?	0.859495	0	0	0	0	0	0	0	0	0	0	0	0	0	0	2.80269	0	0	2.41367	0	0	0	0	1.8427	0	0	0	0	0	0	0.718811	0	0	1.61348	0	0
OTU_712	OTU_712;Bacteria;Firmicutes;Bacilli;Bacillales;Planococcaceae;Sporosarcina;?	0	0	1.43234	0	0	2.24658	0	0	0	0	0	0	0	1.6432	0	0	0	0	2.6804	0	0	0.943674	0	0	0	0	1.90235	0	0	0	0	0	0	0	0	0
OTU_713	OTU_713;Bacteria;Firmicutes;Clostridia;Clostridiales;Ruminococcaceae;Oscillospira;?	0	0	0	0	0	0	0	0	0	0	0	0	0	0	0	0	0	0	1.05802	0	0	0	0	0	0	0	0	0	0.656514	1.51995	0	0.871666	2.01071	0	0.655242	1.6496
OTU_715	OTU_715;Bacteria;Firmicutes;Clostridia;Clostridiales;?;?;?	0	0	0	0	0	0	0	0	0	0	0	0	0	0	0	0	0	0	0	0	0	0	0	0	0	0	0	0	0	0	0	3.65728	0	0	0	0
OTU_716	OTU_716;Bacteria;Firmicutes;Clostridia;Clostridiales;?;?;?	0	3.40641	0	0	0	0	0	1.15059	0	0	0	0	0	0	1.5968	0	0	0	0	0	0	0	0	0	0	0	0	0	0	0	0	0	0	0	0	0
OTU_717	OTU_717;Bacteria;Firmicutes;Clostridia;Clostridiales;Ruminococcaceae;?;?	0	0	0	0	0	0	0	0	0	0	0	0	0	1.6432	1.5968	0	0	0	0	0	0	0	0	0	1.90579	0	0	0	2.48804	0	0	0	0.813487	0	0	0
OTU_718	OTU_718;Bacteria;Verrucomicrobia;Verrucomicrobiae;Verrucomicrobiales;Verrucomicrobiaceae;Akkermansia;muciniphila	0	0	0	0	0	0	0	1.78244	1.9591	0	0	0	0	2.39153	0	1.58133	1.54036	0	0	0	0	0	0	0	0	1.00043	1.90235	0	0	0	0.718811	0	0	0.754146	0	0
OTU_719	OTU_719;Bacteria;Firmicutes;Clostridia;Clostridiales;Clostridiaceae;?;?	0	0	2.39152	0	0	1.16898	0	0	0	0	0	0	0	0	0	0	0	0	0	0	1.09575	0	0	1.19749	0	0	0	0	0	0	0	0	0	0	0.655242	2.18981
OTU_720	OTU_720;Bacteria;Bacteroidetes;Bacteroidia;Bacteroidales;Bacteroidaceae;Bacteroides;acidifaciens	0	0	1.43234	0	1.59089	0	1.37556	0	0	0	0	0	0	0	0	0	1.54036	0	0	0	0	0	0	0	0	0	0	0	0	0	0	0	0	2.14834	0	0.776097
OTU_721	OTU_721;Bacteria;Firmicutes;Clostridia;Clostridiales;?;?;?	0	0	0	0	0	0	0	0	0	0	0	0	0	0	0	1.58133	0	0	0	0	0	0	0	0	0	0	0	0	0	0	0	2.36426	2.2592	1.24687	0	0
OTU_722	OTU_722;Bacteria;Firmicutes;Clostridia;Clostridiales;Lachnospiraceae;Roseburia;?	0	1.76586	0	1.05117	0	0	0	0	2.41475	0	0	0	0	0	0	1.58133	0	0	0	0	0	0	0	0	0	0	0	0	0.656514	1.51995	0	0.871666	0	0	0	0
OTU_724	OTU_724;Bacteria;Firmicutes;Clostridia;Clostridiales;Ruminococcaceae;?;?	2.09004	0	0	0	0	0	0	0	0	0	0	0	0	0	3.71681	0	0	0	2.08617	0	0	0	0	0	0	0	0	0	0	0	0	0	0	0	0	0
OTU_725	OTU_725;Bacteria;Firmicutes;Clostridia;Clostridiales;Ruminococcaceae;?;?	0	0	0	0	0	0	0	0	0	0	0	0	0	0	0	0	0	0	0	0	0	0	0	0	0	0	0	0	0	0	0	0	1.71033	1.61348	1.72226	1.6496
OTU_726	OTU_726;Bacteria;Firmicutes;Clostridia;Clostridiales;Lachnospiraceae;Blautia;?	0	0	0	0	0	0	0	0	0	1.91407	0	0	0	0	0	0	0	0	0	1.77559	0	2.23072	0	2.90053	0	0	0	0	0	0	0	0	0	0	0	0
OTU_728	OTU_728;Bacteria;Firmicutes;Clostridia;Clostridiales;Ruminococcaceae;?;?	0	1.76586	0	0	0	0	0	0	0	0	0	0	0	0	0	0	0	0.994296	0	0	0	0	1.04074	0	0	0	0	1.89089	0	2.0402	0.718811	0	0	0	0	0
OTU_729	OTU_729;Bacteria;Firmicutes;Clostridia;Clostridiales;?;?;?	0	0	0.887072	0	0	0	0	0	0	0	0	0	0	0	0	0	2.94117	0	0	0	1.09575	0	0	0	0	0	0	0	0	0	0	1.41118	0	1.24687	0	0
OTU_730	OTU_730;Bacteria;Tenericutes;Mollicutes;RF39;?;?;?	0	0	0	0	0	0	0	0	0	0	0	0	0	0	0	0	0	0	0	0	0	0	0	1.19749	0	0	0	4.10867	0	0	0	0	0	0	0	0
OTU_731	OTU_731;Bacteria;Firmicutes;Bacilli;Bacillales;Bacillaceae;Bacillus;?	0	0	0	0	0	0	0	0	0	0	0	2.41955	0	0	0	0	0	0	2.41367	0	0	1.91466	1.63903	1.8427	0	0	0	0	0	0	0	0	0	0	0	0
OTU_732	OTU_732;Bacteria;Actinobacteria;Actinobacteria;Actinomycetales;Micrococcaceae;Rothia;?	0	0	2.39152	0	0	0	0	0	0	0	0	0	0	0	0	0	0	0.994296	0	0	0	0	1.63903	0	0.937883	0	0	0	0	1.8034	0	0	0	0	0	0
OTU_733	OTU_733;Bacteria;Proteobacteria;Gammaproteobacteria;Enterobacteriales;Enterobacteriaceae;?;?	0	0	0	0	0	1.80614	1.76215	0	0	2.70872	0	0	0	0	0	0	0	0.994296	1.05802	0	1.09575	0.943674	0	0	0	0	0	0	0	0	0	0	0	0	0	0
OTU_734	OTU_734;Bacteria;Bacteroidetes;Bacteroidia;Bacteroidales;S24-7;?;?	0	0	0	0	0	1.16898	0.845868	0	0	0	0	0	0	0	0	2.31757	0	0	2.08617	0	0	0	0	0	0	0	0	0	0	0	0.718811	0.871666	0	0	0.655242	1.6496
OTU_735	OTU_735;Bacteria;Firmicutes;Clostridia;Clostridiales;Lachnospiraceae;?;?	1.78375	0	0	0	0	0	0	0	0	0	0	0	0	0	0	0	0	0	0	0	0	0	0	0	1.90579	0	0	0	0	0	2.08036	0	0	0	1.10418	0
OTU_736	OTU_736;Bacteria;Firmicutes;Clostridia;Clostridiales;Ruminococcaceae;Oscillospira;?	0	0	0	0	0	0	0	0	0	0	0	1.66677	0	2.88181	0	0	0	0	3.27151	0	1.09575	0	0	0	0	0	0	0	0	0	0	0	0	0	0	0
OTU_737	OTU_737;Bacteria;Firmicutes;Clostridia;Clostridiales;Lachnospiraceae;Blautia;?	0	0	0	1.05117	0	0	0	0	0	1.25359	0	0	2.76106	0	0	0	0	0	1.05802	0	0	0	0	0	0	0	0	0	0	2.0402	0	0	0.813487	0	0.655242	0
OTU_738	OTU_738;Bacteria;Firmicutes;Clostridia;Clostridiales;Ruminococcaceae;?;?	0	0.848202	0	0	0	0	0	0	0	0	0	0	0	0	0	0	0	0	1.05802	0	0	0	2.06069	0	0	0	0	0	0	1.8034	0	0	0	0	0	1.94485
OTU_739	OTU_739;Bacteria;Firmicutes;Clostridia;Clostridiales;Ruminococcaceae;?;?	0	0	0	0	0	0	1.37556	0	0	0	0	0	0	0	0	0	0	0	0	1.14528	0	0	0	0	0	1.00043	0	0	0	0	2.62448	0	0	0	0	0.776097
OTU_741	OTU_741;Bacteria;Firmicutes;Clostridia;Clostridiales;Lachnospiraceae;Coprococcus;?	1.39441	1.3788	0	0	0	0	0	0	0	0	0	0	0	0	2.33612	0	0	0	0	0	0	0	0	0	0	0	0	0	0	0	2.46487	0	0	0	0	0
OTU_742	OTU_742;Bacteria;Firmicutes;Clostridia;Clostridiales;Lachnospiraceae;?;?	1.39441	0	0	0	0	1.16898	0	0	0	0	0	0	0	0	0	0	0	0	0	0	0	2.48983	0	0	0.937883	1.58553	0	0	0	0	1.19639	0	0	0	0	0
OTU_743	OTU_743;Bacteria;Firmicutes;Bacilli;Lactobacillales;Streptococcaceae;Lactococcus;?	0	0	0.887072	0	0	2.85651	0	0	0	0	0	0	0	0	0	0	1.54036	0	1.05802	1.77559	0	0	1.04074	0	0	0	0	1.23531	0	0	0	0	0	0	0	0
OTU_744	OTU_744;Bacteria;Firmicutes;Clostridia;Clostridiales;?;?;?	0.859495	0.848202	0	0	0	0	0	0	0	0	0	0	0	0	2.33612	0	0.966677	0	0	0	0	0	0	0	0	0	0	0	0	0	0	2.36426	0	1.61348	0	0
OTU_745	OTU_745;Bacteria;Firmicutes;Clostridia;Clostridiales;Ruminococcaceae;?;?	0	0	0	0	0	0	0	0	0	0	0	1.66677	0	0	0	0	0	0	1.05802	1.14528	0	0	1.04074	0	0	0	0	0	0	1.51995	0	0	1.71033	0	0	1.6496
OTU_746	OTU_746;Bacteria;Firmicutes;Clostridia;Clostridiales;?;?;?	1.78375	2.07074	0	0	0	0	0	0	0	0	0	0	0	0	0	0	0	0.994296	0	0	0	0	0	0	0	0	0	0	1.10604	0	0.718811	0	1.33051	0	0	0
OTU_747	OTU_747;Bacteria;Firmicutes;Clostridia;Clostridiales;Peptostreptococcaceae;?;?	0	0	0	0	0	0	0	0	0	0	0	0	0	0	2.33612	0	0	0	1.05802	0	1.09575	0	0	0	0.937883	0	0	0	0	0	0.718811	2.11073	0	0	1.44607	0
OTU_749	OTU_749;Bacteria;Firmicutes;Clostridia;Clostridiales;Clostridiaceae;Clostridium;?	0	2.88792	0	0	0	0	0	0	0	0	0	0	0	0	0	0	0	0	0	0	0	0	0	0	0	2.58567	0	0	0	0	0	0	0	0	0	0
OTU_750	OTU_750;Bacteria;Firmicutes;Clostridia;Clostridiales;?;?;?	0	0	0	0	0	0	0	0	0	0	0	0	0	0	0	0	0	0	0	0	0	0	0	0	0	0	0	0	0	1.16685	0	0	1.71033	1.24687	1.10418	1.94485
OTU_751	OTU_751;Bacteria;Firmicutes;Clostridia;Clostridiales;?;?;?	0	0.848202	0	1.05117	0	0	0.845868	0	0	0	3.61449	0	0	0	0	0	0	0	0	0	0	1.50936	0	0	0	1.00043	0	0	0	0	0	0	0	0	0	0
OTU_752	OTU_752;Bacteria;Bacteroidetes;Bacteroidia;Bacteroidales;S24-7;?;?	0	0	1.43234	0	0	0	0	0	0	0	0	0	0	0	0	0	0	0	0	0	0	0	0	0	0	3.46021	0	0	0	0	0	0	0	0	0.655242	0
OTU_753	OTU_753;Bacteria;Bacteroidetes;Bacteroidia;Bacteroidales;S24-7;?;?	0	0	0	0	0	0	0	0	0	0	0	0	0	0	0	0	0	0	0	0	0	0	0	0	0	1.58553	0	0	0	0	0	3.21688	0	0	0	0
OTU_757	OTU_757;Bacteria;Firmicutes;Clostridia;Clostridiales;Ruminococcaceae;?;?	2.09004	0	0	0	0	0	0	0	0	1.91407	0	0	0	0	0	0	0	0	0	0	0	0	0	0	0	0	0	0	0	1.51995	0.718811	1.41118	0	0	0	0
OTU_759	OTU_759;Bacteria;Bacteroidetes;Bacteroidia;Bacteroidales;S24-7;?;?	0	0	0	0	0	0	0	0	0	0	0	0	0	0	0	0	0	0	0	0	0	0	0	0	0	0	0	0	0.656514	0.69831	2.08036	0.871666	2.01071	0	0	0
OTU_761	OTU_761;Bacteria;Firmicutes;Clostridia;Clostridiales;Ruminococcaceae;Faecalibacterium;prausnitzii	1.39441	0	0	1.05117	0	0	0	0	0	2.36543	0	0	0	0	0	0	0	0	1.05802	0	0	0	1.04074	0	0	0	0	0	0	1.8034	0	0	0	0	0	0
OTU_763	OTU_763;Bacteria;Bacteroidetes;Bacteroidia;Bacteroidales;Porphyromonadaceae;Parabacteroides;distasonis	0	0	0	1.05117	0	0	0	0	0	0	0	0	0	0	0	0	0	0	0	0	0	0	0	0	0	0	0	0	0	0	0.718811	1.80295	2.01071	1.61348	0	0
OTU_765	OTU_765;Bacteria;Firmicutes;Clostridia;Clostridiales;?;?;?	0	1.76586	0	0	0	0	0	0	2.41475	0	0	0	0	0	0	0	0	0	0	0	0	0	0	0	0	0	0	0	1.10604	0	0	0	0	0	0	1.94485
OTU_767	OTU_767;Bacteria;Firmicutes;Clostridia;Clostridiales;Peptostreptococcaceae;?;?	0.859495	0	2.39152	1.05117	0	1.80614	0	1.15059	0	0	0	0	0	0	0	0	0	0	0	0	0	0	0	0	0	1.58553	0	0	0	0	0	0	0	0	0	0
OTU_768	OTU_768;Bacteria;Firmicutes;Clostridia;Clostridiales;Ruminococcaceae;Ruminococcus;?	1.39441	0	0	0	0	0	0	0	0	1.25359	0	0	0	0	0	0	0	0	0	0	0	0	0	0	0	0	0	0	0	0	0	0.871666	1.71033	2.14834	0	0
OTU_769	OTU_769;Bacteria;Firmicutes;Clostridia;Clostridiales;Peptostreptococcaceae;?;?	1.78375	0.848202	0	0	0	0	0	0	0	0	0	0	0	0	0	0	0	0	0	0	0	0	0	0	0	0	0	0	0	0	1.55458	2.11073	0	0	0.655242	0
OTU_770	OTU_770;Bacteria;Firmicutes;Clostridia;Clostridiales;Ruminococcaceae;?;?	0.859495	0	0	0	1.00445	0	0	0	0	0	0	0	0	0	1.5968	0	0	0	0	1.14528	0	1.50936	0	1.19749	0	0	0	0	0	0	0	0	1.71033	0	0	1.27797
OTU_775	OTU_775;Bacteria;Firmicutes;Clostridia;Clostridiales;Ruminococcaceae;Oscillospira;?	0	0	0	3.55115	0	0	0	0	0	0	0	0	0	0	0	0	0	0	0	0	0	0	0	0	0	0	0	0	0	0	1.19639	0	0	0	0	0
OTU_776	OTU_776;Bacteria;Firmicutes;Clostridia;Clostridiales;Ruminococcaceae;?;?	2.09004	0	1.82711	0	0	0	0	0	0	0	0	0	0	0	2.33612	1.58133	0	1.57735	0	0	0	0	0	0	0	0	0	0	0	0	0	0	0	0	0	0
OTU_778	OTU_778;Bacteria;Firmicutes;Clostridia;Clostridiales;Ruminococcaceae;?;?	0	0	0	0	0	0	0	0	0	0	0	0	0	0	0	0	0	0	0	0	0	0	0	0	0	0	1.24434	2.68196	0	0	0	2.76732	0	0	0	0
OTU_779	OTU_779;Bacteria;Firmicutes;Clostridia;Clostridiales;Lachnospiraceae;?;?	3.19283	0.848202	0	0	0	0	0	0	0	0	0	0	0	0	0	0	0	0	1.05802	0	0	0	0	0	0	0	0	0	0	0	0	0	0	0	0	0
OTU_780	OTU_780;Bacteria;Firmicutes;Clostridia;Clostridiales;Ruminococcaceae;?;?	0	0	0	0	0	0	0	0	1.2893	0	0	0	0	2.39153	0	0	0	1.57735	2.08617	0	0	0	0	0	0	0	0	0	0	1.51995	0.718811	0	0	0	0	0
OTU_781	OTU_781;Bacteria;Firmicutes;Clostridia;Clostridiales;?;?;?	0	0	0.887072	0	0	0	0	0	0	1.25359	0	0	0	0	0	0	0.966677	0	0	0	0	2.70941	0	0	0	0	0	0	0	0	0	0.871666	0	1.24687	0	0
OTU_782	OTU_782;Bacteria;Firmicutes;Clostridia;Clostridiales;Ruminococcaceae;Ruminococcus;?	0	0	0	0	0	0	0	0	0	1.25359	0	0	0	0	0	0	0	0	1.05802	0	0	2.70941	0	1.19749	0	0	0	0	0	1.16685	0	0	0.813487	0	0	0
OTU_784	OTU_784;Bacteria;Firmicutes;Clostridia;Clostridiales;?;?;?	1.39441	0	0	0	0	0	0	0	0	0	0	0	0	0	0	0	0.966677	0	0	0	0	0	0	0	0.937883	2.00064	0	0	0	0	0.718811	1.41118	0	1.24687	0	0
OTU_785	OTU_785;Bacteria;Firmicutes;Clostridia;Clostridiales;Peptostreptococcaceae;?;?	0	0	2.60798	0	0	0	0	0	0	0	0	0	0	0	0	0	0.966677	0	0	0	1.71126	0.943674	0	0	0	1.00043	0	0	0	0	0	0.871666	0	0	0	0
OTU_786	OTU_786;Bacteria;Bacteroidetes;Bacteroidia;Bacteroidales;S24-7;?;?	0	0	0	0	1.59089	0	0	0	0	0	0	0	0	0	0	0	0	0	0	0	0	0	0	0	0.937883	0	0	0	0.656514	0	0	0	2.2592	0	0	1.6496
OTU_787	OTU_787;Bacteria;Firmicutes;Clostridia;Clostridiales;Christensenellaceae;?;?	0	0	0	0	0	0	0	0	0	0	0	0	0	0	0	0	0	0	0	0	0	0	0	1.19749	0	0	0	0	2.87558	0	0	0	0	0	0	0
OTU_788	OTU_788;Bacteria;Firmicutes;Clostridia;Clostridiales;Lachnospiraceae;?;?	1.39441	0	0	1.05117	0	0	0	0	0	0	0	0	0	0	0	0	0	0.994296	2.90543	0	0	0	0	0	0	0	0	0	0	0	1.19639	0	0	0	0	0
OTU_789	OTU_789;Bacteria;Tenericutes;Mollicutes;Anaeroplasmatales;Anaeroplasmataceae;?;?	0	0.848202	0	0	0	0	0	0	0	0	0	0	0	0	0	0	0	0	0	0	1.09575	0.943674	0	0	1.90579	0	0	2.33998	0	0	0	0	1.33051	0	0	0
OTU_790	OTU_790;Bacteria;Proteobacteria;Gammaproteobacteria;Enterobacteriales;Enterobacteriaceae;?;?	0	0	0	1.65279	2.00667	0	0	2.22037	0	0	0	0	0	0	0	0	0	0	0	0	0	0	0	0	0	0	0	2.33998	0	0	0	0	0	0	0	0
OTU_792	OTU_792;Bacteria;Firmicutes;Bacilli;Lactobacillales;Lactobacillaceae;Lactobacillus;?	0	0	0	0	0	0	0.845868	0	0	0	0	0	0	1.6432	0	0	0	0	0	0	0	0	2.65224	0	0	2.32261	0	0	0	0	0	0	0	0	0	0
OTU_794	OTU_794;Bacteria;Bacteroidetes;Bacteroidia;Bacteroidales;S24-7;?;?	0	0	0	0	0	0	0	0	0	0	0	0	0	0	0	0	0	0	0	0	0	0	0	0	0	0	0	0	0.656514	0.69831	1.19639	1.41118	1.33051	0.754146	1.10418	0
OTU_796	OTU_796;Bacteria;Firmicutes;Clostridia;Clostridiales;Ruminococcaceae;Anaerotruncus;?	0.859495	0	0	1.05117	0	0	0	0	0	0	0	0	0	0	0	0	0	0	1.66181	0	0	0	0	1.19749	0.937883	0	1.24434	1.89089	0	0	0	0	1.33051	0	0	0
OTU_797	OTU_797;Bacteria;Firmicutes;Clostridia;Clostridiales;?;?;?	0	0	0	0	0	0	0	0	0	0	0	0	0	0	0	0	0	0	0	0	0	0	0	0	0	0	0	0	1.72468	1.51995	0	0	0	0	0.655242	1.6496
OTU_798	OTU_798;Bacteria;Firmicutes;Clostridia;Clostridiales;Lachnospiraceae;Coprococcus;?	0	0	0	0	0	0	0	0	0	0	0	0	0	0	0	1.58133	0	0	2.6804	0	0	0	1.63903	2.28694	0	0	0	0	0	0	0	0	0	0	0	0
OTU_799	OTU_799;Bacteria;Firmicutes;Bacilli;Bacillales;Bacillaceae;?;?	0	0	0	0	0	0	0	0	0	0	0	0	0	0	0	0	0	0	0	0	0	0	0	2.90053	0	0	0	0	0	0	0	0	1.33051	0	1.72226	0
OTU_800	OTU_800;Bacteria;Proteobacteria;Betaproteobacteria;Burkholderiales;Oxalobacteraceae;?;?	0	0	0	0	0	0	0	0	0	0	0	0	0	0	0	3.16508	0	0	0	2.21278	0	0	0	0	0	0	0	0	1.72468	0	0	0	0	0	0	0
OTU_801	OTU_801;Bacteria;Bacteroidetes;Bacteroidia;Bacteroidales;Prevotellaceae;Prevotella;?	0	0	0	0	0	0	0	0	0	0	0	0	0	0	0	0	0	0	0	0	0	0	0	0	0	0	0	0	0	0	0	0	3.22219	0	0	0
OTU_803	OTU_803;Bacteria;Bacteroidetes;Bacteroidia;Bacteroidales;Bacteroidaceae;Bacteroides;?	0	0	0	0	0	0	0	0	0	0	0	0	0	0	0	0	0	0	0	0	0	0	0	0	0	1.58553	0	0	0.656514	0	0	2.36426	0	1.61348	0	0
OTU_804	OTU_804;Bacteria;Tenericutes;Mollicutes;RF39;?;?;?	1.78375	0	0	3.25967	0	0	0	0	0	0	0	0	0	0	0	0	0	0	0	0	0	0	0	0	0	0	0	0	0	0	0	0	0	0	0	0
OTU_805	OTU_805;Bacteria;Firmicutes;Clostridia;Clostridiales;Ruminococcaceae;?;?	0	0	0	0	0	0	0	0	0	0	0	0	0	0	1.5968	1.58133	0	0	0	0	1.09575	1.91466	0	0	0.937883	0	1.24434	1.23531	0	0.69831	0	0	0	0	0	0.776097
OTU_807	OTU_807;Bacteria;Proteobacteria;Deltaproteobacteria;Desulfovibrionales;Desulfovibrionaceae;Desulfovibrio;C21_c20	0	0	0	0	0	0	0	0	0	0	0	0	0	0	0	0	0	0	0	0	0	0	0	0	0	0	0	0	0	0.69831	2.28539	1.80295	0.813487	0	0	0
OTU_808	OTU_808;Bacteria;Firmicutes;Clostridia;Clostridiales;Lachnospiraceae;?;?	0.859495	1.3788	0	0	0	0	0	0	0	1.25359	0	0	0	0	0	0	0	0	0	0	0	0.943674	0	0	0	0	0	0	0	0	0	2.36426	0	0.754146	0	0
OTU_809	OTU_809;Bacteria;Firmicutes;Clostridia;Clostridiales;Ruminococcaceae;?;?	0	0	0	0	0	0	0	0	0	0	0	0	0	0	0	0	0	0	0	0	0	0	0	0	0	0	0	0	0	0	1.84129	0	1.33051	0	1.95397	0
OTU_810	OTU_810;Bacteria;Firmicutes;Clostridia;Clostridiales;Ruminococcaceae;?;?	0	0	0	0	0	0	0	0	0	0	0	0	0	0	0	0	0	0	0	0	2.47222	0	0	0	0	0	0	0	1.44827	0	0	0.871666	1.71033	0	0	0
OTU_812	OTU_812;Bacteria;Firmicutes;Clostridia;Clostridiales;?;?;?	0	0	1.82711	0	0	0	0	0	0	0	0	0	0	0	0	1.58133	0	0	0	0	0	1.91466	0	1.8427	0	0	0	0	0	0.69831	0	0	0	0.754146	0	0
OTU_814	OTU_814;Bacteria;Bacteroidetes;Bacteroidia;Bacteroidales;?;?;?	0	0	2.39152	0	0	0	0	0	0	0	0	0	0	0	0	0	0	0	1.66181	0	0	0	0	0	0	0	1.90235	0	0	0	0	0.871666	0	0	0	0
OTU_815	OTU_815;Bacteria;Firmicutes;Clostridia;Clostridiales;Lachnospiraceae;Blautia;?	0	0	0	0	0	0	0	0	0	1.25359	0	0	0	0	0	0	0	0	2.08617	0	0	0	0	1.19749	0	0	0	0	0	0	0	0	1.33051	0	1.44607	0
OTU_816	OTU_816;Bacteria;Firmicutes;Clostridia;Clostridiales;Ruminococcaceae;Oscillospira;?	0	0	0	0	0	0	0	0	0	1.25359	0	0	0	0	0	0	0	0.994296	1.66181	0	0	2.48983	1.04074	0	0	0	0	0	0	0	0	0	0	0	0	0
OTU_818	OTU_818;Bacteria;Firmicutes;Bacilli;Bacillales;Bacillaceae;?;?	0	0	0	0	0	0	0	0	0	0	0	0	0	0	0	0	0	0	2.41367	0	0	0.943674	0	0	0	0	0	0	0	2.0402	0	0	0	0	0	0
OTU_819	OTU_819;Bacteria;Firmicutes;Clostridia;Clostridiales;Ruminococcaceae;?;?	0	0	0	0	0	0	0	0	0	0	0	0	0	0	0	0	0	0	0	0	0	0	0	0	0	1.58553	0	0	0	1.51995	0	0	0	0	0	2.18981
OTU_820	OTU_820;Bacteria;Firmicutes;Clostridia;Clostridiales;Lachnospiraceae;?;?	0	0	0	0	0	0	0	0	0	0	0	0	0	0	1.5968	0	0	0	0	0	0	0	0	0	0	0	0	0	0	0	0	2.76732	0	0	1.10418	0
OTU_821	OTU_821;Bacteria;Firmicutes;Clostridia;Clostridiales;Ruminococcaceae;Oscillospira;?	0	1.76586	0	0	0	0	0	0	0	0	0	0	0	0	0	0	0	1.99144	0	0	0	0	0	0	1.90579	0	0	0	0.656514	0	0	0	0	0	0	0
OTU_822	OTU_822;Bacteria;Firmicutes;Clostridia;Clostridiales;?;?;?	0	1.76586	0	0	0	0	1.76215	0	0	0	0	0	2.27877	0	0	0	0	0	0	0	0	0	0	1.19749	0	1.00043	0	0	0	0	0	0	0	0	0	0
OTU_824	OTU_824;Bacteria;Firmicutes;Clostridia;Clostridiales;?;?;?	1.39441	1.3788	1.43234	0	0	0	0	0	0	0	0	0	0	0	0	2.80269	0.966677	0	0	0	0	0	0	0	0	0	0	0	0	0	0	0	0	0	0	0
OTU_825	OTU_825;Bacteria;Tenericutes;Mollicutes;RF39;?;?;?	0	0	0	0	0	0	0	0	0	0	0	0	0	0	0	0	0	0	0	0	0	0	0	0	0	0	0	0	0	0	1.84129	2.57982	0	0	0	0
OTU_826	OTU_826;Bacteria;Firmicutes;Clostridia;Clostridiales;Ruminococcaceae;Oscillospira;?	0	0	1.82711	0	0	0	0	0	0	0	0	0	0	0	0	0	0	0	1.66181	0	0	0	0	0	0	0	0	0	0	1.51995	0	0	0.813487	0	0	0.776097
OTU_827	OTU_827;Bacteria;Firmicutes;Clostridia;Clostridiales;?;?;?	0.859495	0	0	0	0	0	0	0	0	0	0	0	0	0	1.5968	0	0	0	1.05802	0	0	0	0	0	0	0	0	0	0	0	2.28539	0	0	0	0.655242	0
OTU_828	OTU_828;Bacteria;Firmicutes;Clostridia;Clostridiales;Ruminococcaceae;Oscillospira;?	1.39441	0	0	0	0	0	0	0	0	0	0	0	0	0	0	0	0	0	2.08617	0	0	0	0	0	0	0	0	0	0	0	2.08036	0	0	0	0	0
OTU_830	OTU_830;Bacteria;Firmicutes;Clostridia;Clostridiales;Lachnospiraceae;[Ruminococcus];torques	0	0	0	0	0	0	0	0	0	0	0	0	0	0	0	0	0	0	0	0	0	0	0	0	0	0	0	0	0	2.0402	0	0	0	1.61348	0	1.27797
OTU_831	OTU_831;Bacteria;Firmicutes;Bacilli;Lactobacillales;Lactobacillaceae;Lactobacillus;?	1.78375	0	0	0	0	2.24658	1.37556	0	0	0	0	0	0	0	0	0	0	0	0	0	0	0	0	0	0	1.58553	0	0	0	0	0	0	0	0	0	0
OTU_832	OTU_832;Bacteria;Firmicutes;Clostridia;Clostridiales;Lachnospiraceae;Anaerostipes;?	0	0	0	0	0	0	0	0	0	0	0	0	0	0	0	0	0	0	0	0	0	0	1.63903	1.19749	0	0	0	0	0	2.0402	0	0	0	0	0	1.27797
OTU_833	OTU_833;Bacteria;Firmicutes;Clostridia;Clostridiales;Ruminococcaceae;?;?	0	0	0.887072	0	0	0	0	0	0	0	0	0	0	0	2.33612	0	0	0	0	0	2.14134	0	1.04074	0	0	0	0	0	0	1.51995	0	0	0	0	0	0
OTU_834	OTU_834;Bacteria;Bacteroidetes;Bacteroidia;Bacteroidales;S24-7;?;?	0	0	0	0	0	0	0	0	0	0	0	0	0	0	0	0	0	0	0	0	0	0	0	0	0	3.17068	0	0	0	0	0.718811	0	0	0	0	0.776097
OTU_835	OTU_835;Bacteria;Firmicutes;Clostridia;Clostridiales;Ruminococcaceae;?;?	0	0	0	0	0	0	0	0	2.41475	0	0	0	0	0	0	0	0	0	0	0	0	0	0	0	0	0	0	0	1.10604	0.69831	0	2.11073	0	0	0	0
OTU_836	OTU_836;Bacteria;Firmicutes;Clostridia;Clostridiales;Lachnospiraceae;Dorea;?	0	0	0	0	0	0	0	0	0	0	0	0	0	0	0	0	0	0	1.66181	0	0	0	0	0	0	0	0	0	0	2.58034	0	0	0	0	0	0
OTU_837	OTU_837;Bacteria;Firmicutes;Clostridia;Clostridiales;Ruminococcaceae;?;?	0	0	0	1.05117	0	0	0	0	0	0	0	0	0	0	0	0	0	0.994296	0	1.14528	0	0	0	0	0	0	0	0	0	2.24355	0.718811	0	0	0	0	0
OTU_839	OTU_839;Bacteria;Firmicutes;Clostridia;Clostridiales;Ruminococcaceae;?;?	0	0	1.43234	0	0	0	0	0	0	0	0	0	0	0	0	0	0	0	0	0	1.71126	0	0	2.62612	0	0	0	0	0	0	0	0	1.33051	0	0	0
OTU_840	OTU_840;Bacteria;Bacteroidetes;Bacteroidia;Bacteroidales;S24-7;?;?	0	0	0	0	0	0	0	0	0	0	0	0	0	0	0	0	0	0	0	0	0	0	0	0	0	0	0	0	2.7576	0	0	0	0	0	0	0
OTU_841	OTU_841;Bacteria;Firmicutes;Clostridia;Clostridiales;Clostridiaceae;Clostridium;perfringens	0.859495	0	0.887072	0	0	0	0	0	0	0	0	0	0	0	0	0	0	0	0	0	0	0	0	0	0.937883	0	0	0	0	0	0.718811	0	0	0.754146	1.72226	0.776097
OTU_842	OTU_842;Bacteria;Firmicutes;Clostridia;Clostridiales;Ruminococcaceae;?;?	0	0	0	0	0	0	0	0	0	0	0	0	0	0	0	0	0	0	0	0	0	0	0	0	0	0	0	0	0	0	0	2.57982	0	0	1.72226	0
OTU_844	OTU_844;Bacteria;Firmicutes;Clostridia;Clostridiales;Ruminococcaceae;?;?	1.39441	0.848202	0	0	0	0	0	0	0	0	0	0	0	0	1.5968	0	0	0	1.05802	0	0	0	0	0	0	1.00043	0	0	0	0	0	0	0	0	0.655242	1.6496
OTU_845	OTU_845;Bacteria;Firmicutes;Clostridia;Clostridiales;?;?;?	0	0	0	0	0	0	0	0	0	0	0	0	0	2.88181	0	0	0	0	0	0	0	0	0	0	0	0	0	0	0	0	0.718811	0	2.47112	0	0	0
OTU_846	OTU_846;Bacteria;Firmicutes;Clostridia;Clostridiales;Ruminococcaceae;?;?	0	0	2.13674	0	0	0	0	0	0	0	0	0	0	0	1.5968	0	0	0	0	0	0	0	0	0	1.50153	1.00043	1.24434	0	0	0	0	0.871666	0	0	0	0
OTU_847	OTU_847;Bacteria;Firmicutes;Clostridia;Clostridiales;Ruminococcaceae;?;?	0	0	0	0	0	0	0	0	0	0	0	0	0	0	0	0	0	0	0	0	0	0	0	0	0	0	0	0	0	0	0	2.11073	0	2.35609	0	0
OTU_848	OTU_848;Bacteria;Firmicutes;Clostridia;Clostridiales;Ruminococcaceae;?;?	0	0	0	0	0	1.16898	0	0	0	0	0	0	0	0	0	0	0	0	0	0	0	0	0	1.19749	0	0	0	0	0	0	0.718811	0.871666	0	0	0.655242	2.18981
OTU_849	OTU_849;Bacteria;Tenericutes;Mollicutes;RF39;?;?;?	0	0	0	0	0	0	0	0	0	0	0	0	0	0	0	0	0	0	0	0	0	0	0	0	0	0	0	2.68196	0	0	0	2.57982	0	0	0	0
OTU_850	OTU_850;Bacteria;Firmicutes;Clostridia;?;?;?;?	0	0	0	0	0	0	0	1.15059	0	0	0	0	0	0	0	0	1.94972	0.994296	1.05802	0	0	0	0	1.8427	0	1.00043	0	0	0	0	0	0	0	0	0	0
OTU_851	OTU_851;Bacteria;Firmicutes;Clostridia;Clostridiales;Ruminococcaceae;Ruminococcus;?	0	0	0	0	2.32904	0	0	0	0	0	0	0	0	0	0	0	0	0	0	0	0	0	0	0	1.50153	0	1.24434	0	0	0	0.718811	0	0	0.754146	0	0
OTU_852	OTU_852;Bacteria;Firmicutes;Clostridia;Clostridiales;Lachnospiraceae;?;?	0	0	0	0	0	0	0	0	0	0	0	0	0	0	0	1.58133	0	0	0	0	0	0	0	1.8427	0	0	0	0	0	1.51995	0	0.871666	0	0	0.655242	0.776097
OTU_856	OTU_856;Bacteria;Bacteroidetes;Bacteroidia;Bacteroidales;S24-7;?;?	0	0	0	0	0	0	0	0	0	0	0	0	0	0	0	0	0	0	0	0	0	0	0	0	0	0	0	0	0	0	2.46487	0	0	0	1.10418	0
OTU_858	OTU_858;Bacteria;Firmicutes;Clostridia;Clostridiales;Ruminococcaceae;Oscillospira;?	0	0	0	0	0	0	0	0	0	0	0	2.9117	0	0	0	0	0	0.994296	1.05802	0	0	0.943674	0	1.19749	0	0	0	0	0	0.69831	0	0.871666	0	0	0	0
OTU_859	OTU_859;Bacteria;Firmicutes;Bacilli;Lactobacillales;Lactobacillaceae;Lactobacillus;?	0	0	0	2.66926	0	0	0	0	0	0	0	0	0	0	0	0	0	0	0	0	0	0	0	2.28694	0	0	0	0	0	0.69831	0	0	0	0	0	0
OTU_860	OTU_860;Bacteria;Firmicutes;Clostridia;Clostridiales;Ruminococcaceae;Oscillospira;?	0.859495	0.848202	0	2.40294	0	0	0	0	0	0	0	0	0	0	0	0	0	0	1.05802	0	0	0	0	0	0	0	0	0	0	0	1.19639	0	0	0	0	0
OTU_861	OTU_861;Bacteria;Firmicutes;Clostridia;Clostridiales;?;?;?	0	0.848202	0	0	0	0	0	0	0	0	0	0	1.54909	0	0	0	0	0	1.66181	0	0	0	0	0	0	0	0	0	0	0.69831	0.718811	1.41118	0	0	0.655242	0
OTU_862	OTU_862;Bacteria;Firmicutes;Clostridia;Clostridiales;Ruminococcaceae;Oscillospira;?	0	0	0	0	0	0	0	0	3.2727	0	0	0	0	0	0	0	0	0	0	0	0	1.91466	0	0	0	0	0	0	0	0	0	0	0	0	0	0
OTU_863	OTU_863;Bacteria;Firmicutes;Clostridia;Clostridiales;Christensenellaceae;?;?	0	0.848202	0	0	0	0	0	0	0	1.91407	0	0	0	0	0	0	0	1.99144	0	0	0	0	0	0	0	0	0	0	0	0	0	1.41118	0.813487	0	0	0
OTU_866	OTU_866;Bacteria;Firmicutes;Clostridia;Clostridiales;?;?;?	0	0	0	0	0	0	0	0	0	0	0	0	0	0	0	0	1.54036	0	0	0	0	1.50936	1.63903	0	0	1.00043	1.90235	0	0	0	0	0	0	0	0	0
OTU_867	OTU_867;Bacteria;Firmicutes;Clostridia;Clostridiales;Ruminococcaceae;Oscillospira;?	0	0.848202	0	0	0	0	0	0	1.9591	0	0	0	0	0	0	0	0	0	0	1.14528	0	0	0	0	0	0	0	0	0	1.51995	0	0	0	0.754146	0	0.776097
OTU_868	OTU_868;Bacteria;Firmicutes;Clostridia;Clostridiales;?;?;?	0	0	0.887072	0	0	0	0	1.15059	0	0	0	0	1.54909	0	2.33612	0	0	0	0	0	0	0	0	1.19749	0	0	0	0	0	0	0	0.871666	0	1.24687	0	0
OTU_869	OTU_869;Bacteria;Actinobacteria;Coriobacteriia;Coriobacteriales;?;?;?	0	0	0	0	0	0	0	0	0	0	0	0	0	0	0	0	0	0	0	1.14528	0	0	0	0	0	0	2.35257	0	0	0	0	0	0.813487	1.24687	1.10418	0
OTU_870	OTU_870;Bacteria;Firmicutes;Clostridia;Clostridiales;Lachnospiraceae;Dorea;?	0	1.3788	0.887072	0	0	0	0	0	0	0	0	0	0	0	0	0	0	0	0	0	0	1.50936	0	0	0	0	0	0	0	1.8034	0	0	0	0	0	0
OTU_871	OTU_871;Bacteria;Firmicutes;Clostridia;Clostridiales;?;?;?	0	0.848202	0	0	0	0	0	0	0	0	0	0	0	0	0	0	0	0	0	0	0	0	0	2.28694	0	0	0	0	0	0	0	0	0	0	0	2.18981
OTU_872	OTU_872;Bacteria;Tenericutes;Mollicutes;RF39;?;?;?	0	0	2.96261	0	0	0	0	0	0	0	0	0	0	0	0	0	0	0	0	0	0	0	0	0	0	0	0	0	0	0	0	0.871666	0	0	0	0
OTU_873	OTU_873;Bacteria;Bacteroidetes;Bacteroidia;Bacteroidales;S24-7;?;?	0	0	0	0	0	0	0	0	0	0	0	0	0	0	0	0	0	0	0	0	0	0	0	0	0	0	1.90235	0	0	0	2.46487	0	0	0	0	0
OTU_875	OTU_875;Bacteria;Firmicutes;Clostridia;Clostridiales;?;?;?	0	0	0	0	0	0	0	1.78244	0	0	0	0	0	0	0	0	0	0	0	0	0	0	0	0	0	0	0	0	1.72468	0	0	0	0	0	0	1.6496
OTU_876	OTU_876;Bacteria;Firmicutes;Clostridia;Clostridiales;Lachnospiraceae;?;?	0	0	0	0	0	0	0	0	0	0	0	0	0	0	0	0	0	0	0	0	0	0	0	0	0	0	0	0	0	0.69831	0	0.871666	1.71033	1.90556	0	0
OTU_877	OTU_877;Bacteria;Firmicutes;Clostridia;Clostridiales;Lachnospiraceae;Roseburia;?	0	0	0	0	0	0	0	0	0	0	0	0	0	0	0	0	0	0	0	0	0	0	0	0	0	0	0	0	0	0	0.718811	0.871666	1.33051	1.24687	1.10418	0.776097
OTU_879	OTU_879;Bacteria;Firmicutes;Clostridia;Clostridiales;Ruminococcaceae;?;?	0	0	0	0	0	0	0	0	0	0	0	0	0	0	0	0	0	0	0	0	0	0	0	0	0	0	0	0	0.656514	0.69831	0.718811	0.871666	0.813487	1.61348	0.655242	0
OTU_880	OTU_880;Bacteria;Bacteroidetes;Bacteroidia;Bacteroidales;S24-7;?;?	0	0	0	0	0	0	0	0	0	0	0	0	0	0	0	0	0	0	0	0	0	0	0	0	0	0	0	0	0	0	2.76817	0	0	0	0	0
OTU_881	OTU_881;Bacteria;Bacteroidetes;Bacteroidia;Bacteroidales;S24-7;?;?	0	0	0	0	0	0	0	0	0	0	0	0	0	0	0	0	0	0	0	0	0	0	0	0	0	0	0	0	0	0	2.76817	0	0	0	0	0
OTU_884	OTU_884;Bacteria;Firmicutes;Clostridia;Clostridiales;?;?;?	0	0	0.887072	0	0	0	0	0	0	0	0	0	0	0	0	0	0	0.994296	0	0	0	2.23072	0	0	0	1.00043	0	0	0	0	0	0	0	1.24687	0	0
OTU_885	OTU_885;Bacteria;Firmicutes;Clostridia;Clostridiales;?;?;?	0	0	0	0	0	0	0	0	0	0	0	0	0	0	0	0	0	0	0	0	0	0	0	0	0	0	0	3.72125	0	0	0	0	0	0	0	0
OTU_887	OTU_887;Bacteria;Firmicutes;Clostridia;Clostridiales;Ruminococcaceae;?;?	0	0	0.887072	0	0	0	0.845868	0	0	0	0	0	0	0	0	0	0	0.994296	0	1.14528	1.09575	0	0	0	0	0	0	0	1.10604	0.69831	0	0.871666	0	0	0	0
OTU_888	OTU_888;Bacteria;Verrucomicrobia;Verrucomicrobiae;Verrucomicrobiales;?;?;?	0	0	0	0	0	0	0	0	0	0	0	0	0	0	0	0	0	0	0	0	0	0	0	0	0	0	0	0	1.10604	0	1.55458	0	0	1.24687	1.10418	0
OTU_889	OTU_889;Bacteria;Firmicutes;Clostridia;?;?;?;?	0	0	0	0	0	0	0	0	0	0	0	0	0	0	0	0	0	0	0	0	0	0	0	0	0	0	0	0	0	0	0	3.08202	0	0	0	0
OTU_890	OTU_890;Bacteria;Firmicutes;Clostridia;Clostridiales;Ruminococcaceae;?;?	0	0	0	0	0	0	0	0	0	1.25359	0	0	0	0	0	0	0	0	0	0	0	0	0	0	1.90579	1.00043	1.24434	0	0	0	1.55458	0	0	0	0	0
OTU_891	OTU_891;Bacteria;Firmicutes;Clostridia;Clostridiales;[Mogibacteriaceae];?;?	0	0	0	0	0	0	0	0	0	0	0	0	0	0	0	0	0	0	1.05802	0	0	0.943674	0	0	0	0	0	0	0	0.69831	1.84129	0	0	0	0.655242	0.776097
OTU_892	OTU_892;Bacteria;Bacteroidetes;Bacteroidia;Bacteroidales;S24-7;?;?	0	0	0	0	0	0	0	0	0	0	0	0	0	0	0	0	0	0	0	0	0	0	0	0	0	0	0	0	0.656514	1.16685	1.84129	0	0	1.24687	0	0
OTU_893	OTU_893;Bacteria;Firmicutes;Clostridia;Clostridiales;Ruminococcaceae;Oscillospira;?	0	0	0	0	0	0	0	0	0	0	0	0	0	0	0	0	0	0	0	0	0	0	0	1.19749	0	0	0	0	0	0	0	1.41118	0	0	1.44607	1.6496
OTU_896	OTU_896;Bacteria;Firmicutes;Clostridia;Clostridiales;Lachnospiraceae;?;?	0	0	0	0	0	1.16898	0	0	0	1.25359	0	0	0	0	0	0	0	0	1.66181	0	0	0	0	0	0	0	0	0	0	1.51995	0.718811	0	0	0	0	0
OTU_900	OTU_900;Bacteria;Firmicutes;Clostridia;Clostridiales;Lachnospiraceae;?;?	0	0	0	0	0	0	0	0	0	0	0	0	0	0	0	0	0	0	0	0	0	0	0	0	0	0	0	0	0	1.51995	0	1.41118	0	0	0.655242	1.27797
OTU_901	OTU_901;Bacteria;Firmicutes;Clostridia;Clostridiales;Ruminococcaceae;Oscillospira;?	0	0	0	0	0	0	0	0	0	0	0	0	0	0	0	0	0	0	0	0	0	0	0	0	0	0	0	0	0	0	0.718811	1.80295	0	0	1.72226	0
OTU_902	OTU_902;Bacteria;Firmicutes;Clostridia;Clostridiales;Lachnospiraceae;?;?	0	0	0	0	0	0	0	0	0	0	0	0	0	0	0	0	0	0	0	0	0	0	0	0	0	0	0	0	1.44827	0	0	0	1.71033	0	0	1.27797
OTU_904	OTU_904;Bacteria;Actinobacteria;Actinobacteria;Actinomycetales;Yaniellaceae;Yaniella;?	0	0	0	0	0	0	0	0	0	0	0	0	0	0	1.5968	0	0	0	0	0	0	0.943674	0	0	0	0	1.24434	0	0	0	0	0	0	2.14834	0	0
OTU_905	OTU_905;Bacteria;Firmicutes;Clostridia;Clostridiales;?;?;?	0	0	0	0	0	0	0	0	0	0	0	0	0	0	0	0	0	0	0	0	0	0	0	0	0	0	0	0	0	2.0402	0	0	0.813487	1.24687	0	0
OTU_906	OTU_906;Bacteria;Bacteroidetes;Bacteroidia;Bacteroidales;S24-7;?;?	0	0	0	0	0	0	0	0	0	0	0	0	0	0	0	0	0	0	0	0	0	0	0	0	0	0	0	0	0	0	2.08036	1.80295	0	0	0	0
OTU_908	OTU_908;Bacteria;Firmicutes;Clostridia;Clostridiales;?;?;?	0	0.848202	2.13674	0	0	0	0	0	0	0	0	0	0	1.6432	0	0	0	0	0	0	0	0	0	0	0	0	0	0	0.656514	0	0	0.871666	0	0	0	0
OTU_909	OTU_909;Bacteria;Deferribacteres;Deferribacteres;Deferribacterales;Deferribacteraceae;Mucispirillum;schaedleri	0	0	0	0	0	0	0	0	0	0	0	0	0	0	0	0	0	2.57544	0	1.77559	0	0	0	0	0	0	0	1.23531	0	0	0	0	0	0	0	0
OTU_912	OTU_912;Bacteria;Firmicutes;Clostridia;Clostridiales;Ruminococcaceae;Oscillospira;?	1.78375	0	0	0	0	0	0	0	0	1.91407	0	0	0	0	1.5968	0	0	0.994296	1.05802	0	0	0	0	0	0	0	0	0	0	0	0	0	0	0	0	0
OTU_915	OTU_915;Bacteria;Firmicutes;?;?;?;?;?	0	0	0	0	0	0	0	0	0	0	0	0	0	0	0	0	0	0	0	0	0	0	0	0	0	0	0	0	0.656514	1.8034	1.55458	0	0	0	0	0
OTU_917	OTU_917;Bacteria;Bacteroidetes;Bacteroidia;Bacteroidales;S24-7;?;?	0	0	0	0	0	0	0	0	0	0	0	0	0	0	0	0	0	0	2.08617	1.14528	0	0	0	0	0	0	1.24434	0	0	0.69831	0	0	0	0	1.10418	0
OTU_918	OTU_918;Bacteria;Firmicutes;Clostridia;Clostridiales;Ruminococcaceae;Ruminococcus;?	0	0	0	0	0	0	0	0	0	0	0	0	0	0	0	0	0	0	0	0	0	0	0	0	0	0	0	0	0	0	0	2.11073	2.01071	0	0	0
OTU_919	OTU_919;Bacteria;Firmicutes;Erysipelotrichi;Erysipelotrichales;Erysipelotrichaceae;?;?	0	0.848202	0	0	0	0	0	0	0	0	0	0	0	0	0	0	0	0	1.66181	0	0	0	0	2.90053	0	0	0	0	0	0	0	0	0	0	0	0
OTU_920	OTU_920;Bacteria;Firmicutes;Clostridia;Clostridiales;Lachnospiraceae;?;?	0	0	0	0	0	0	0	0	0	0	0	0	0	0	0	0	0	0	0	0	0	0	0	0	0	0	0	0	0	0	0	0	0	0	0	2.74415
OTU_921	OTU_921;Bacteria;Firmicutes;Clostridia;Clostridiales;Ruminococcaceae;Ruminococcus;?	0	0	0	0	0	0	0	0	0	0	0	0	0	0	0	0	0	0	2.41367	0	0	0	0	1.19749	0	0	0	2.33998	0	0	0	0	0	0	0	0
OTU_922	OTU_922;Bacteria;Bacteroidetes;Bacteroidia;Bacteroidales;Rikenellaceae;?;?	0	0	0	1.65279	0	0	0	0	0	0	0	0	0	0	0	0	0	0	0	1.77559	0	0	0	0	0	0	0	0	1.10604	0	0	1.41118	0	0	0	0
OTU_925	OTU_925;Bacteria;Firmicutes;Clostridia;Clostridiales;Ruminococcaceae;Ruminococcus;?	0	0	0	0	1.00445	0	1.37556	0	0	0	0	0	1.54909	0	2.33612	0	0	0	0	0	0	0	1.04074	0	0	0	0	1.23531	0	0	0	0	0	0	0	0
OTU_926	OTU_926;Bacteria;Firmicutes;Clostridia;Clostridiales;Lachnospiraceae;[Ruminococcus];gnavus	0	0	0	1.05117	0	0	0.845868	0	0	0	0	0	0	0	0	0	0	0	0	0	0	0	0	0	0.937883	1.00043	0	0	0	0	1.55458	0.871666	0	0	0	0
OTU_928	OTU_928;Bacteria;Firmicutes;Clostridia;Clostridiales;Ruminococcaceae;?;?	2.09004	1.3788	0	0	0	0	0	0	0	0	0	0	0	0	0	0	0	0	0	0	0	0	0	0	0	0	0	0	0	0	0	0	0	0.754146	0.655242	0
OTU_929	OTU_929;Bacteria;Firmicutes;Clostridia;Clostridiales;Ruminococcaceae;?;?	0	0	0	1.05117	0	0	0	0	0	0	0	0	0	0	0	0	0	0	0	0	0	0	0	0	0	0	0	0	0	0	0	0	0	0	2.32888	0
OTU_930	OTU_930;Bacteria;Firmicutes;Clostridia;Clostridiales;Ruminococcaceae;Ruminococcus;?	1.78375	0	0	0	0	0	0	0	0	0	0	0	0	0	0	0	0	0	1.05802	0	0	1.91466	0	0	0	0	0	0	0	0	0	0	0	0	0.655242	0
OTU_931	OTU_931;Bacteria;Bacteroidetes;Bacteroidia;Bacteroidales;?;?;?	0	0	0	0	0	0	0.845868	0	0	0	3.4116	0	0	0	0	0	0	0	0	0	0	0	0	0	0	0	0	0	0	0	0	0	0	0	0	0
OTU_932	OTU_932;Bacteria;Firmicutes;Clostridia;Clostridiales;Ruminococcaceae;Oscillospira;?	1.78375	0.848202	0	0	0	0	0	0	0	0	0	0	0	0	2.33612	0	0	0	0	0	0	0	0	0	0	0	0	0	0	0	0	0	0	0	0.655242	0
OTU_933	OTU_933;Bacteria;Firmicutes;Clostridia;Clostridiales;?;?;?	0	0	0	0	0	0	0	0	0	0	0	0	0	0	0	2.31757	0	0	0	0	1.09575	0	0	0	0.937883	0	0	0	0	0	1.55458	0	0	0	0	0
OTU_934	OTU_934;Bacteria;Bacteroidetes;Bacteroidia;Bacteroidales;S24-7;?;?	0	0	0	0	0	0	0	0	0	0	0	0	0	0	0	0	0	0	0	0	0	0	0	0	0	0	0	0	0.656514	0	0	1.80295	1.71033	0	0	0
OTU_935	OTU_935;Bacteria;Proteobacteria;Gammaproteobacteria;Enterobacteriales;Enterobacteriaceae;?;?	0	0	0	0	0	0	0	0	0	0	0	0	0	1.6432	0	0	0	0	0	0	1.09575	0	2.06069	0	0	1.58553	0	0	0	0	0	0	0	0	0	0
OTU_936	OTU_936;Bacteria;Firmicutes;Clostridia;Clostridiales;Lachnospiraceae;?;?	0	0	0	0	0	0	0.845868	0	0	0	0	0	0	0	0	0	0	0	0	0	0	0	0	0	0	0	0	0	0	1.16685	0	0	0.813487	0	0	1.6496
OTU_937	OTU_937;Bacteria;Firmicutes;Clostridia;Clostridiales;Ruminococcaceae;?;?	0	0	0	0	0	0	0	0	0	0	0	0	0	0	0	0	0	0	0	0	0	1.50936	2.38657	0	0	0	0	0	0.656514	0	0	0	0	0	0	0
OTU_938	OTU_938;Bacteria;Firmicutes;Clostridia;Clostridiales;?;?;?	0	0	0	0	0	0	0	0	0	0	0	0	0	0	0	0	0	0	0	0	0	0	0	0	0	0	0	0	0	0	0.718811	0	0	0.754146	1.72226	0.776097
OTU_939	OTU_939;Bacteria;Firmicutes;Clostridia;Clostridiales;?;?;?	0	0	0	0	0	0	0	0	3.47361	0	0	0	0	0	0	0	0	0	0	0	0	0	0	0	0	0	0	0	0	0	0	0	0	0	0	0
OTU_940	OTU_940;Bacteria;Firmicutes;Clostridia;Clostridiales;Ruminococcaceae;?;?	0	0	0.887072	0	0	0	0	0	0	0	0	0	0	0	0	0	0	0.994296	0	0	0	0.943674	0	0	1.90579	0	0	0	0	0	0	0	0.813487	0	0	0
OTU_941	OTU_941;Bacteria;Firmicutes;Clostridia;Clostridiales;Lachnospiraceae;?;?	0	0	0	0	0	0	0	0	0	0	0	0	0	0	0	0	0	0	0	0	0	0	0	0	0	0	0	0	0	0.69831	0	0	1.33051	0	1.10418	1.27797
OTU_944	OTU_944;Bacteria;Firmicutes;Clostridia;Clostridiales;Ruminococcaceae;?;?	0	1.3788	0	0	0	0	0	0	0	0	0	0	0	0	0	0	1.94972	0	0	0	0	0	0	0	1.50153	0	0	0	0	0	0	0	0	0	0	0
OTU_947	OTU_947;Bacteria;Bacteroidetes;Bacteroidia;Bacteroidales;S24-7;?;?	0	0	0	0	0	0	0	0	0	0	0	0	0	0	0	0	0	0	0	0	0	0	0	0	0	0	0	0	0	0	0	0	0.813487	1.61348	1.44607	0
OTU_948	OTU_948;Bacteria;Firmicutes;?;?;?;?;?	0	0	0	1.65279	0	0	0	0	0	0	0	0	0	0	0	0	0	0	0	0	0	0	0	0	0	0	0	0	0	0	0.718811	0	2.01071	0	0	0
OTU_949	OTU_949;Bacteria;Firmicutes;Clostridia;Clostridiales;?;?;?	0	0	0	1.05117	0	0	0	0	0	0	0	0	0	2.88181	2.82256	0	0	0	0	0	0	0	0	0	0	0	0	0	0	0	0	0	0	0	0	0
OTU_950	OTU_950;Bacteria;Firmicutes;Clostridia;Clostridiales;Ruminococcaceae;?;?	0.859495	0	0	0	1.00445	0	0.845868	0	0	0	2.07511	0	0	0	0	0	0	0	1.05802	0	0	0	0	0	0	0	0	0	0	0	0	0	0.813487	0	0	0
OTU_951	OTU_951;Bacteria;Firmicutes;Clostridia;Clostridiales;Ruminococcaceae;?;?	0	0	0	0	0	0	0	0	0	0	0	0	0	0	0	0	0	0	0	0	0	0	0	0	0	0	0	0	0	0	0	2.76732	0	0	0	0
OTU_953	OTU_953;Bacteria;Firmicutes;Clostridia;Clostridiales;Lachnospiraceae;?;?	0	0	0	0	0	0	0	0	1.2893	0	0	0	0	0	0	0	0	0	0	0	0	0	0	0	0	0	2.6952	0	0	0	1.19639	0	0	0	0	0
OTU_954	OTU_954;Bacteria;Firmicutes;Clostridia;Clostridiales;?;?;?	0	0	0	0	0	0	0	0	0	0	0	0	0	0	0	0	0	0	0	0	0	0	0	0	0	0	0	0	0	0	0	0	2.01071	0	1.44607	0
OTU_955	OTU_955;Bacteria;Firmicutes;Clostridia;Clostridiales;?;?;?	0	0	0	0	0	0	0	0	0	0	0	0	0	0	0	0	0	0	0	0	0	0	0	0	0	0	0	0	0	1.16685	0	1.41118	0	1.24687	0.655242	0
OTU_956	OTU_956;Bacteria;Firmicutes;?;?;?;?;?	0	0	0	0	0	0	0	0	0	0	0	0	0	0	0	0	0	0	0	0	0	0	0	0	0	0	0	0	0	1.16685	0	0	0	1.61348	1.10418	0
OTU_957	OTU_957;Bacteria;Firmicutes;Clostridia;Clostridiales;Ruminococcaceae;?;?	0	0	0	0	0	0	0	0	0	0	0	0	0	0	0	0	0	0	0	0	0	0	0	0	0	0	0	0	0	0.69831	0	0	0	0	0	2.39916
OTU_958	OTU_958;Bacteria;Firmicutes;Clostridia;Clostridiales;Lachnospiraceae;?;?	2.09004	0	0	0	0	0	0	0	0	0	0	0	0	0	0	0	0	0	1.05802	0	0	0	0	0	0	0	0	0	0	0	0	1.41118	0	0	0	0
OTU_959	OTU_959;Bacteria;Firmicutes;Clostridia;Clostridiales;?;?;?	0	0	0	0	0	0	0	0	0	0	0	0	0	0	0	0	0	0	0	0	0	0	0	0	0	0	0	0	0	0	0.718811	1.41118	1.33051	0	0.655242	0.776097
OTU_960	OTU_960;Bacteria;Bacteroidetes;Bacteroidia;Bacteroidales;S24-7;?;?	0	0	0.887072	0	0	0	0	0	0	0	0	0	0	0	0	0	0	0	0	0	0	0	1.63903	0	0	0	0	0	0	0	0	2.11073	0	0	0	0
OTU_962	OTU_962;Bacteria;Bacteroidetes;Bacteroidia;Bacteroidales;S24-7;?;?	0	0	0	0	0	0	0.845868	0	0	0	0	0	0	0	0	0	0	1.57735	0	0	0	0	0	0	0.937883	0	0	0	0	0	0	0	0	0	1.44607	0
OTU_963	OTU_963;Bacteria;Firmicutes;Clostridia;Clostridiales;Ruminococcaceae;Oscillospira;?	0	0.848202	0	1.05117	0	0	0	0	0	0	0	0	0	0	0	0	0	0	2.41367	0	0	0	0	0	0	0	0	0	0	0	0	0	0.813487	0	0	0
OTU_965	OTU_965;Bacteria;Firmicutes;Clostridia;?;?;?;?	0	0	0	0	0	0	0	0	0	0	0	0	0	0	1.5968	0	0	0	0	1.77559	0	0.943674	0	0	1.90579	0	0	0	0	0	0	0	0	0	0	0
OTU_966	OTU_966;Bacteria;Tenericutes;Mollicutes;Anaeroplasmatales;?;?;?	0	0	0	0	0	0	0	0	0	0	0	0	0	0	0	0	0	0	1.05802	0	0	0	0	0	0	0	0	2.68196	0	0	0	0	1.33051	0	0	0
OTU_967	OTU_967;Bacteria;Firmicutes;Clostridia;Clostridiales;?;?;?	0	0	0	0	0	0	0	0	0	0	0	0	0	3.98778	0	0	0	0	0	0	0	0	0	0	0	0	0	0	0	0	0	0	0	0	0	0
OTU_969	OTU_969;Bacteria;Firmicutes;Clostridia;Clostridiales;Ruminococcaceae;?;?	0.859495	0	0	0	0	0	0	0	0	0	0	0	0	1.6432	0	0	0	0	0	0	0	0	0	1.19749	0	0	0	0	0	0	0	0	0	1.90556	0	0
OTU_970	OTU_970;Bacteria;Firmicutes;Clostridia;Clostridiales;Ruminococcaceae;?;?	0	0	0	0	0	0	0	0	0	0	0	0	0	0	0	0	0	0	0	0	0	0	0	0	0	0	0	0	0	0	0	2.57982	0	0.754146	0	0
OTU_973	OTU_973;Bacteria;Firmicutes;Clostridia;Clostridiales;Dehalobacteriaceae;?;?	2.09004	0	0	0	0	0	0	0	0	0	0	0	0	0	0	0	0	0	0	0	0	0	0	1.19749	0	0	0	0	0.656514	0	0.718811	0	0	0	0	0
OTU_974	OTU_974;Bacteria;Firmicutes;Clostridia;Clostridiales;Ruminococcaceae;?;?	0	0	0	0	0	0	0	0	0	0	0	0	0	0	0	0	0	0	0	0	1.09575	0	0	0	0	0	0	0	0	0	0	0	2.47112	0	0	0
OTU_975	OTU_975;Bacteria;Firmicutes;Clostridia;Clostridiales;Ruminococcaceae;?;?	0	0	0	0	0	0	1.37556	0	0	0	0	0	0	0	0	0	0	0	1.05802	0	0	0	1.04074	0	0	0	0	0	0	0	0	0	0	0	1.10418	0.776097
OTU_977	OTU_977;Bacteria;Firmicutes;Clostridia;Clostridiales;Lachnospiraceae;?;?	0	0.848202	0	0	0	0	0	0	0	0	0	0	0	0	0	0	0	0.994296	0	0	0	0	0	2.62612	0	0	0	0	0	0	0	0	0	0.754146	0	0
OTU_978	OTU_978;Bacteria;Firmicutes;Clostridia;Clostridiales;Ruminococcaceae;?;?	0	0	0	0	0	0	0	0	0	0	0	0	0	0	2.33612	0	0	0	0	0	0	0	0	0	0	0	0	0	0	0	0	0	0	1.90556	0.655242	0
OTU_979	OTU_979;Bacteria;Firmicutes;Clostridia;Clostridiales;?;?;?	0	0	0	0	0	0	0	0	0	0	0	0	0	0	0	0	0	2.57544	1.05802	0	0	0	0	1.19749	0	0	0	0	0	0	0	0	0	0	0	0
OTU_982	OTU_982;Bacteria;Bacteroidetes;Bacteroidia;Bacteroidales;?;?;?	0	0	0	1.05117	0	0	0	0	0	0	0	0	0	0	0	0	1.94972	0	0	0	0	0	0	0	0.937883	1.00043	1.24434	0	0	0	0	0	0	0	0	0
OTU_983	OTU_983;Bacteria;Bacteroidetes;Bacteroidia;Bacteroidales;Bacteroidaceae;Bacteroides;uniformis	0	0	0	0	0	0	0	0	0	0	0	0	0	0	0	0	0	0	0	0	0	0	0	0	0	0	0	0	0.656514	0	1.55458	0	0	0.754146	0	1.27797
OTU_984	OTU_984;Bacteria;Firmicutes;Clostridia;Clostridiales;Lachnospiraceae;Blautia;?	0	0	0	0	0	0	0	0	1.2893	0	0	0	0	0	0	0	0	0	0	0	0	0	1.04074	0	0	0	0	0	0	1.8034	0	0	0	0.754146	0	0
OTU_985	OTU_985;Bacteria;Tenericutes;Mollicutes;Anaeroplasmatales;?;?;?	0	0	0	0	0	0	0	0	0	0	0	0	0	0	0	0	0	0	0	0	0	0	0	0	0	0	0	0	0	0	0.718811	0	0	0	2.15357	0
OTU_987	OTU_987;Bacteria;Firmicutes;Clostridia;Clostridiales;Ruminococcaceae;Ethanoligenens;?	0	0	0	0	0	0	0	0	0	0	0	0	1.54909	0	1.5968	2.80269	0	0	0	1.77559	0	0	0	0	0	0	0	0	0	0	0	0	0	0	0	0
OTU_989	OTU_989;Bacteria;Firmicutes;Clostridia;Clostridiales;Lachnospiraceae;Coprococcus;?	0	0	0.887072	0	0	0	0	0	0	0	0	0	0	0	0	0	0	0	2.08617	0	0	0	0	1.19749	0	0	0	1.89089	0	0	0	0	0	0	0	0
OTU_990	OTU_990;Bacteria;Firmicutes;Clostridia;Clostridiales;Ruminococcaceae;?;?	0	0	0	0	0	0	0	0	0	0	0	0	0	1.6432	0	0	0	0	2.08617	0	0	0	0	0	0	0	0	0	1.10604	0.69831	0	0	0	0	0	0
OTU_991	OTU_991;Bacteria;Firmicutes;Clostridia;Clostridiales;?;?;?	0	0	0	0	0	0	0	0	0	0	0	0	0	0	0	2.31757	0	0	1.05802	0	0	0	0	0	0	0	0	0	0	0	0	0	0	0	1.72226	0
OTU_994	OTU_994;Bacteria;Firmicutes;Clostridia;Clostridiales;?;?;?	0	0.848202	0	0	0	0	0	0	0	1.25359	0	0	0	0	0	0	0	0	0	0	0	0	0	0	0	0	0	0	0	0	1.19639	0	0.813487	0	0	0.776097
OTU_997	OTU_997;Bacteria;Verrucomicrobia;Verrucomicrobiae;Verrucomicrobiales;Verrucomicrobiaceae;Akkermansia;muciniphila	0	0	0	0	0	0	0	0	0	0	0	0	0	0	0	0	0	0	0	0	0	0	0	0	0	0	0	0	0	0	2.28539	0	0	0	0	0
OTU_998	OTU_998;Bacteria;Deferribacteres;Deferribacteres;Deferribacterales;Deferribacteraceae;Mucispirillum;?	0	0	0	0	0	0	0	0	0	0	0	0	0	0	0	0	0	2.31279	0	1.77559	0	0	0	0	0	0	0	0	0	0	0	0	0	0	0	0
OTU_1003	OTU_1003;Bacteria;Firmicutes;Clostridia;Clostridiales;Lachnospiraceae;Coprococcus;?	0	0	0	0	0	0	0	0	0	0	0	0	0	0	0	0	0	0	1.66181	0	0	0	0	0	0	0	0	0	0.656514	0.69831	0	0	0	0	0	1.27797
OTU_1004	OTU_1004;Bacteria;Firmicutes;Clostridia;Clostridiales;Christensenellaceae;?;?	0	0	0	0	0	0	0	0	2.41475	0	0	0	0	0	0	0	0	0.994296	0	0	0	0	0	0	0	0	0	0	0	1.16685	0	0	0	0	0	0
OTU_1008	OTU_1008;Bacteria;Actinobacteria;Actinobacteria;Actinomycetales;Corynebacteriaceae;Corynebacterium;?	0	0	0	0	0	0	0	0	0	0	0	0	0	0	0	0	0	0	0	0	0	0	2.06069	2.28694	0	0	0	0	0	0	0	0	0	0	0	0
OTU_1009	OTU_1009;Bacteria;Firmicutes;Erysipelotrichi;Erysipelotrichales;Erysipelotrichaceae;?;?	0	0	0	0	0	0	0	0	0	0	0	0	0	0	0	0	0	0	0	0	0	0	0	0	0	0	0	0	0	0	0	1.80295	0	1.61348	0	0
OTU_1010	OTU_1010;Bacteria;Firmicutes;Clostridia;Clostridiales;?;?;?	0	0	1.82711	0	0	0	0	0	0	0	0	2.41955	0	0	0	0	0	0	0	0	0	0	0	0	0	0	0	0	0	0	0	0	0	0.754146	0	0
OTU_1011	OTU_1011;Bacteria;Firmicutes;Clostridia;Clostridiales;Peptostreptococcaceae;?;?	0	0	0	0	1.59089	0	0.845868	0	0	0	0	0	0	0	0	0	0	0	0	0	0	0	0	0	0	0	0	0	0	0	0	0	0	0	0	1.6496
OTU_1012	OTU_1012;Bacteria;Firmicutes;Clostridia;Clostridiales;Ruminococcaceae;?;?	0	0	0	0	0	0	0	0	0	0	0	0	0	0	0	0	0	0	0	0	0	0	2.06069	1.19749	0	0	0	0	0	1.16685	0	0	0	0	0	0
OTU_1013	OTU_1013;Bacteria;Proteobacteria;Gammaproteobacteria;Enterobacteriales;Enterobacteriaceae;Gluconacetobacter;?	0	0	0	0	0	0	0	2.22037	0	0	0	0	0	2.88181	0	0	0	0	0	0	0	0	0	0	0	0	0	0	0	0	0	0	0	0	0	0
OTU_1014	OTU_1014;Bacteria;Firmicutes;Clostridia;Clostridiales;Ruminococcaceae;?;?	0	0	0	1.05117	0	0	0	0	0	2.70872	0	0	1.54909	0	0	0	0	0	0	0	0	0	0	0	0	0	0	0	0	0	0	0	0	0	0	0
OTU_1017	OTU_1017;Bacteria;Firmicutes;Clostridia;Clostridiales;Ruminococcaceae;?;?	0.859495	0	0.887072	0	0	0	0	0	0	0	0	0	0	0	0	0	0	0	0	0	0	0	0	0	0	0	0	0	0	0	1.55458	0	0.813487	0	0	0
OTU_1018	OTU_1018;Bacteria;Firmicutes;Clostridia;Clostridiales;?;?;?	0	0	0.887072	0	0	0	0	0	0	1.25359	0	0	0	0	0	0	0	0.994296	0	0	0	0	0	0	0	0	0	0	0	0	0.718811	0	0	1.24687	0	0
OTU_1019	OTU_1019;Bacteria;Bacteroidetes;Bacteroidia;Bacteroidales;Rikenellaceae;?;?	0	0	0	0	0	1.16898	0	0	0	0	0	0	0	0	0	0	0	0	0	0	0	0	0	0	1.90579	0	0	1.89089	0	0	0	0	0	0	0	0
OTU_1020	OTU_1020;Bacteria;Actinobacteria;Coriobacteriia;Coriobacteriales;Coriobacteriaceae;Adlercreutzia;?	0	0	0	0	0	0	0	0	0	0	0	0	0	0	0	1.58133	0	0	0	0	0	1.91466	0	0	0	0	0	0	0	0	0	0	0	1.24687	0	0
OTU_1021	OTU_1021;Bacteria;Firmicutes;Clostridia;Clostridiales;Ruminococcaceae;?;?	0	0	0	0	0	0	0	0	0	0	0	0	0	0	0	0	0	0	0	2.21278	0	0	0	0	0	0	0	0	0	0	0	0	1.71033	0	0	0
OTU_1022	OTU_1022;Bacteria;Firmicutes;Clostridia;Clostridiales;Lachnospiraceae;?;?	0	0	0	0	0	0	0	0	0	0	0	0	0	0	0	0	0	0	0	0	0	0	0	0	0	0	0	0	0	2.24355	0	0	0	0	0	0
OTU_1024	OTU_1024;Bacteria;Firmicutes;Clostridia;Clostridiales;Ruminococcaceae;?;?	0	0	0.887072	0	0	0	0	0	0	1.91407	0	0	0	0	0	0	0	0	0	0	0	0	0	0	0	0	0	0	0	1.51995	0	0	0	0	0	0
OTU_1025	OTU_1025;Bacteria;Firmicutes;Clostridia;Clostridiales;?;?;?	0	0.848202	0	1.05117	0	0	0	1.15059	1.2893	0	0	0	0	0	0	0	0	0	1.66181	0	0	0	0	0	0	0	0	0	0	0	0	0	0	0	0	0
OTU_1026	OTU_1026;Bacteria;Firmicutes;Clostridia;Clostridiales;Ruminococcaceae;Ruminococcus;flavefaciens	0	0	0.887072	0	0	0	0	0	0	0	0	0	0	0	0	0	0	0	0	0	0	0	0	0	0	0	0	1.89089	0	1.16685	0	0	0	0	0.655242	0
OTU_1028	OTU_1028;Bacteria;Firmicutes;Clostridia;Clostridiales;?;?;?	0	1.76586	0	1.05117	0	0	0	0	0	0	0	0	0	0	0	0	0	0	0	0	0	0	0	0	0	0	0	0	0	0	0	1.41118	0	0	0	0
OTU_1029	OTU_1029;Bacteria;Actinobacteria;Coriobacteriia;Coriobacteriales;Coriobacteriaceae;Adlercreutzia;?	0	0	0	0	0	0	0	0	0	0	0	0	0	0	0	0	0	0	0	0	0	1.50936	0	0	1.50153	0	0	0	0	0	0.718811	0	0	0.754146	0	0
OTU_1030	OTU_1030;Bacteria;Deferribacteres;Deferribacteres;Deferribacterales;Deferribacteraceae;Mucispirillum;schaedleri	0	0.848202	0	0	0	0	0	0	0	0	0	0	0	0	0	0	0	0.994296	0	1.77559	1.71126	0	0	0	0	0	0	0	0	0	0	0	0	0	0	0
OTU_1031	OTU_1031;Bacteria;Firmicutes;Clostridia;Clostridiales;Ruminococcaceae;?;?	0	0	0	0	0	0	0	0	0	0	0	0	0	0	1.5968	0	0	0	0	0	0	0	0	0	0	2.00064	0	0	1.10604	0	0	0	0	0	0	0
OTU_1032	OTU_1032;Bacteria;Firmicutes;Bacilli;Bacillales;Planococcaceae;Sporosarcina;?	0	0	0	0	0	0	0	0	1.2893	2.36543	0	0	0	0	0	0	0	0	0	0	0	0	0	0	0	0	1.90235	0	0	0	0	0	0	0	0	0
OTU_1033	OTU_1033;Bacteria;Firmicutes;Clostridia;Clostridiales;?;?;?	0	0	0	0	0	0	0	0	0	0	0	0	0	0	2.82256	1.58133	0	0	1.05802	0	0	0	0	0	0.937883	0	0	0	0	0	0	0	0	0	0	0
OTU_1036	OTU_1036;Bacteria;Bacteroidetes;Bacteroidia;Bacteroidales;S24-7;?;?	0	0	0	0	0	0	0	0	0	0	0	0	0	0	0	0	0	0	0	0	0	0	0	0	0	0	0	0	0	0	0	0	0	2.35609	0	0
OTU_1037	OTU_1037;Bacteria;Firmicutes;Clostridia;Clostridiales;Ruminococcaceae;?;?	0.859495	0	0	0	0	0	0	0	1.9591	0	0	0	0	0	0	0	0	0	0	0	0	0	0	0	0	0	0	0	0	0	0	0	0	0	1.44607	0
OTU_1040	OTU_1040;Bacteria;Firmicutes;Bacilli;?;?;?;?	0	0	0	0	0	0	0	0	0	0	0	0	0	0	0	3.45448	0	0	1.05802	0	0	0	0	0	0	0	0	0	0	0	0	0	0	0	0	0
OTU_1041	OTU_1041;Bacteria;Firmicutes;Clostridia;Clostridiales;Ruminococcaceae;Oscillospira;?	0	1.3788	0	0	0	0	0	0	0	0	0	0	0	0	0	1.58133	0	0	0	1.14528	0	0.943674	0	0	0	0	0	0	0	0	0.718811	0	0	0	0	0
OTU_1042	OTU_1042;Bacteria;Firmicutes;Bacilli;Lactobacillales;Lactobacillaceae;Lactobacillus;?	0	0	0	0	0	0	0	0	0	0	0	0	0	0	0	0	0	0	0	0	0	0	2.06069	0	0	0	0	0	0	1.16685	0.718811	0	0	0	0	0
OTU_1043	OTU_1043;Bacteria;Firmicutes;Clostridia;Clostridiales;?;?;?	0.859495	0	0	0	0	0	0	0	0	0	0	0	0	0	0	0	0	0	0	0	0	0	0	0	0	0	0	0	0	0	0	0.871666	0	0	1.72226	0
OTU_1044	OTU_1044;Bacteria;Firmicutes;Clostridia;Clostridiales;Ruminococcaceae;?;?	0	0	0	0	0	0	0	0	0	0	0	0	0	0	0	0	0	0	0	0	0	0	0	0	0	0	0	0	0	0	0	2.57982	0	0	0	0
OTU_1045	OTU_1045;Bacteria;Firmicutes;Clostridia;Clostridiales;Ruminococcaceae;Oscillospira;?	0	0	0	0	0	0	0	0	0	0	0	0	0	0	0	0	0	0	0	0	0	0	0	0	0	0	0	0	0	0	2.08036	0	0	0	0	0.776097
OTU_1046	OTU_1046;Bacteria;Firmicutes;Clostridia;Clostridiales;Ruminococcaceae;Ruminococcus;?	0	0	0.887072	0	0	0	0	0	0	0	0	1.66677	0	0	0	0	0	0	0	0	0	1.91466	0	0	0	0	0	0	0	0	0	0	0.813487	0	0	0
OTU_1049	OTU_1049;Bacteria;Firmicutes;Clostridia;?;?;?;?	0	0	0	0	0	0	0	0	0	0	0	0	0	0	0	0	0	0	0	0	0	0	0	0	0	0	0	0	0	0	0	0	0	0	2.15357	0
OTU_1050	OTU_1050;Bacteria;Firmicutes;Clostridia;Clostridiales;Ruminococcaceae;?;?	0	0	0	0	0	0	0	0	0	0	0	0	0	0	0	0	0	0	0	0	0	2.48983	0	0	0	0	0	0	0	0.69831	0	0	0	0	0	0
OTU_1051	OTU_1051;Bacteria;Firmicutes;Clostridia;?;?;?;?	0	0	2.39152	0	0	0	0	0	1.2893	0	0	0	0	0	0	0	0	0	0	0	0	0	0	0	0	0	0	0	0	0	0	0	0	0	0	0
OTU_1052	OTU_1052;Bacteria;Bacteroidetes;Bacteroidia;Bacteroidales;Bacteroidaceae;Bacteroides;eggerthii	0	0	0	0	0	1.16898	0	0	0	0	0	0	0	0	0	0	0	0	0	0	0	0	0	0	0	0	0	0	1.95656	0	0	0	0	0	0	0
OTU_1056	OTU_1056;Bacteria;Firmicutes;Clostridia;Clostridiales;Lachnospiraceae;?;?	0	0	0	1.65279	0	0	0	0	0	0	0	0	0	0	0	1.58133	0	0	0	0	0	0	0	0	0	0	0	0	0	0	0	0	0	0	1.44607	0
OTU_1057	OTU_1057;Bacteria;Firmicutes;Clostridia;Clostridiales;Ruminococcaceae;?;?	0	2.3223	0	0	0	0	0	0	0	0	0	0	0	0	0	0	0	0	0	0	0	0	0	0	0	0	0	0	0	0	0	0	0	0	0.655242	0
OTU_1058	OTU_1058;Bacteria;Firmicutes;Clostridia;Clostridiales;Ruminococcaceae;?;?	0	0	0	0	0	0	0	0	0	0	0	0	0	1.6432	0	0	0	0	0	0	0	0	0	0	0	0	0	0	0	2.0402	0	0	0	0	0	0
OTU_1059	OTU_1059;Bacteria;Firmicutes;Clostridia;Clostridiales;Ruminococcaceae;?;?	0	0	0	0	0	0	0	0	0	2.98582	0	0	0	0	0	1.58133	0	0	0	0	0	0	0	0	0	0	0	0	0	0	0	0	0	0	0	0
OTU_1060	OTU_1060;Bacteria;Bacteroidetes;Bacteroidia;Bacteroidales;S24-7;?;?	0	0	0	0	0	0	0	0	0	0	0	0	0	0	0	0	0	0	0	0	0	0	0	0	0.937883	0	0	0	1.72468	0	0	0	0.813487	0	0	0
OTU_1066	OTU_1066;Bacteria;Firmicutes;Clostridia;Clostridiales;Lachnospiraceae;Dorea;?	0	0	0.887072	0	0	0	0	0	0	0	0	1.66677	0	0	0	0	0	0	0	0	0	0	0	0	0	0	0	0	1.10604	0	0	0	0	0	1.10418	0
OTU_1073	OTU_1073;Bacteria;Proteobacteria;Betaproteobacteria;Burkholderiales;Alcaligenaceae;Sutterella;?	0	0	0	0	0	0	0	0	0	0	0	0	0	0	0	0	0	0	0	0	0	0	0	0	0	0	0	0	0	0	0.718811	0.871666	1.71033	0	0	0
OTU_1075	OTU_1075;Bacteria;Firmicutes;Clostridia;Clostridiales;Ruminococcaceae;?;?	2.09004	0	0	0	0	0	0	0	0	0	0	0	0	0	0	0	0	0	0	0	0	0	0	0	0	0	0	1.23531	0	0	0	0	0	0	0	0
OTU_1076	OTU_1076;Bacteria;Bacteroidetes;Bacteroidia;Bacteroidales;S24-7;?;?	0	0	0	0	0	0	0	0	0	0	0	0	0	0	0	0	0	0	0	0	0	0	0	0	0	0	0	0	0	0.69831	1.19639	0.871666	0.813487	0	0	0
OTU_1077	OTU_1077;Bacteria;Firmicutes;Erysipelotrichi;Erysipelotrichales;Erysipelotrichaceae;?;?	0	0	0	0	0	0	0	0	0	0	0	0	0	0	0	0	0	0	0	0	0	0	2.38657	1.19749	0	0	0	0	0	0	0	0	0	0	0	0
OTU_1078	OTU_1078;Bacteria;Firmicutes;Clostridia;Clostridiales;Ruminococcaceae;Ruminococcus;?	0	0	0	0	0	0	0	0	0	0	0	0	0	0	0	0	0	0	1.05802	1.14528	0	0	0	0	0	0	0	1.23531	0	1.16685	0	0	0	0	0	0
OTU_1079	OTU_1079;Bacteria;Tenericutes;Mollicutes;Anaeroplasmatales;Anaeroplasmataceae;?;?	0	0	0	0	0	0	0	0	0	0	0	0	0	0	0	0	0	0	0	0	0	0	0	0	0	0	0	0	0	0	1.19639	0	0	1.61348	0	0
OTU_1083	OTU_1083;Bacteria;Bacteroidetes;Bacteroidia;Bacteroidales;S24-7;?;?	0	0	0	0	0	0	0	0	0	0	0	0	2.76106	0	0	0	0	0	0	0	0	0	0	0	0	0	0	0	0	0	0	0	0	0	1.10418	0
OTU_1084	OTU_1084;Bacteria;Firmicutes;Clostridia;Clostridiales;Ruminococcaceae;Oscillospira;?	0	0.848202	0	0	0	0	0	0	0	0	0	0	0	0	0	0	0	0	0	1.77559	0	1.50936	0	0	0	0	0	0	0	0	0	0	0	0	0	0
OTU_1085	OTU_1085;Bacteria;Firmicutes;Clostridia;Clostridiales;Ruminococcaceae;Ruminococcus;flavefaciens	0	0	0	0	0	0	0	0	0	0	0	0	0	0	0	0	0	0	0	0	0	0	0	0	0	0	0	0	0	0.69831	0	0	0	0	1.72226	0
OTU_1088	OTU_1088;Bacteria;Firmicutes;Clostridia;Clostridiales;Ruminococcaceae;?;?	0	0	0	0	0	0	0	0	0	0	0	0	0	0	0	0	0	0	0	0	0	0	0	0	0	0	2.97187	0	0	0	0	0	0	0	0	0
OTU_1089	OTU_1089;Bacteria;Tenericutes;Mollicutes;Anaeroplasmatales;?;?;?	1.78375	0	0	0	0	0	0	0	0	0	0	0	0	0	0	0	0	0	0	0	0	0	0	0	0	0	0	0	0	1.16685	0	0	0	0	0	0
OTU_1091	OTU_1091;Bacteria;Bacteroidetes;Bacteroidia;Bacteroidales;S24-7;?;?	0.859495	0	0	0	0	0	0	0	0	0	0	0	0	0	0	0	0	0	0	0	0	0	0	0	0	0	0	0	0	0	1.84129	0	0	0	0	0
OTU_1092	OTU_1092;Bacteria;Firmicutes;Bacilli;Bacillales;Bacillaceae;?;?	0	0	0	0	0	0	0	0	0	0	0	3.56987	0	0	0	0	0	0	0	0	0	0	0	0	0	0	0	0	0	0	0	0	0	0	0	0
OTU_1094	OTU_1094;Bacteria;Firmicutes;Clostridia;Clostridiales;Lachnospiraceae;?;?	0	1.76586	0	0	0	0	0	0	0	0	0	0	0	0	0	0	0	0	0	0	0	0	0	0	0	0	0	0	0	0	0	1.41118	0	0	0	0
OTU_1095	OTU_1095;Bacteria;Firmicutes;Clostridia;Clostridiales;Ruminococcaceae;?;?	0	1.3788	0	0	0	0	0	0	0	0	0	0	0	0	0	0	0	0	0	0	0	0	0	0	0	0	1.24434	0	0	0	0	0.871666	0	0	0.655242	0
OTU_1101	OTU_1101;Bacteria;Firmicutes;Clostridia;Clostridiales;Ruminococcaceae;?;?	0	0	0	0	0	0	0	0	0	0	0	0	0	0	0	0	0	0	0	0	0	0	0	0	0	0	0	0	0	0	2.08036	0	0	0	0	0
OTU_1102	OTU_1102;Bacteria;Firmicutes;Bacilli;Bacillales;Planococcaceae;Lysinibacillus;boronitolerans	0	0	0	0	0	0	0	0	0	0	0	0	0	0	0	0	0	0	0	0	0	2.48983	0	0	0	0	0	0	0	0	0	0	0	0	0	0
OTU_1103	OTU_1103;Bacteria;Actinobacteria;Actinobacteria;Actinomycetales;Micrococcaceae;Rothia;aeria	0	0	1.43234	0	0	0	0	2.22037	0	0	0	0	0	0	0	0	0	0	0	0	0	0	0	0	0	0	0	0	0	0	0	0	0	0	0	0
OTU_1104	OTU_1104;Bacteria;Firmicutes;Clostridia;Clostridiales;Lachnospiraceae;Blautia;?	0	0	0	0	0	0	0	0	0	0	0	2.9117	0	0	0	0	0.966677	0	0	0	0	0	0	0	0	0	0	0	0	0.69831	0	0	0	0	0	0
OTU_1109	OTU_1109;Bacteria;Firmicutes;Clostridia;Clostridiales;Ruminococcaceae;?;?	0	0	0	0	0	0	0	0	0	0	0	0	0	0	0	0	0	0	0	1.14528	0	0	0	0	0	0	0	0	0	1.51995	0	0	0.813487	0	0	0
OTU_1113	OTU_1113;Bacteria;Firmicutes;Clostridia;?;?;?;?	0	0	1.43234	0	0	0	0	0	0	0	0	0	0	0	1.5968	0	0	0	1.66181	0	0	0	0	0	0	0	0	0	0	0	0	0	0	0	0	0
OTU_1114	OTU_1114;Bacteria;Firmicutes;Clostridia;Clostridiales;Ruminococcaceae;?;?	0	0	0	0	0	0	0	0	0	0	0	0	0	0	1.5968	0	0	0	0	0	0	0	0	0	0	0	1.90235	0	0	0	0	0	1.33051	0	0	0
OTU_1115	OTU_1115;Bacteria;Firmicutes;Clostridia;Clostridiales;Ruminococcaceae;?;?	1.39441	0.848202	0	1.05117	0	0	0	0	0	0	0	0	0	0	0	0	0	0	1.05802	0	0	0	0	0	0	0	0	0	0	0	0	0	0	0	0	0
OTU_1116	OTU_1116;Bacteria;Firmicutes;Clostridia;Clostridiales;Ruminococcaceae;Oscillospira;?	0	0	1.82711	0	0	0	0	0	0	0	0	0	0	0	0	0	0	0	1.05802	0	0	0	0	1.19749	0	0	0	0	0	0	0	0	0	0	0	0
OTU_1118	OTU_1118;Bacteria;Firmicutes;Clostridia;Clostridiales;Ruminococcaceae;Oscillospira;?	0	0	0	0	0	0	0	0	0	0	0	0	0	0	0	0	0	0	0	0	0	0	0	0	0	0	0	0	0	0	0	0	0	2.14834	0	0
OTU_1119	OTU_1119;Bacteria;Firmicutes;Clostridia;Clostridiales;Ruminococcaceae;Oscillospira;?	0	0	0	0	0	0	0	0	0	0	0	0	0	0	0	3.45448	0	0	0	0	0	0	0	0	0	0	0	0	0	0	0	0	0	0	0	0
OTU_1120	OTU_1120;Bacteria;Firmicutes;Clostridia;Clostridiales;Ruminococcaceae;?;?	0	0	0	0	0	0	0	0	0	0	0	0	0	0	0	0	0	0	0	0	0	0	1.04074	0	0	0	0	0	0	0	0	1.80295	0	0	0	0.776097
OTU_1122	OTU_1122;Bacteria;Bacteroidetes;Bacteroidia;Bacteroidales;S24-7;?;?	0	0	0	0	0	0	0	0	0	0	0	0	0	0	0	0	0	0	0	0	0	0	0	0	0.937883	0	0	0	0	0	1.84129	0	0	0	0	0
OTU_1125	OTU_1125;Bacteria;Firmicutes;Clostridia;Clostridiales;Ruminococcaceae;?;?	0	0	0	0	0	0	0	0	0	0	0	0	0	0	0	0	0	0	0	0	0	0	0	0	0	0	0	0	0	0	0	2.36426	0	0	0	0
OTU_1126	OTU_1126;Bacteria;Bacteroidetes;Bacteroidia;Bacteroidales;Porphyromonadaceae;Parabacteroides;?	0	0	1.43234	0	0	0	0	0	0	0	0	0	1.54909	0	0	0	0	0	0	1.14528	0	0	1.04074	0	0	0	0	0	0	0	0	0	0	0	0	0
OTU_1127	OTU_1127;Bacteria;Firmicutes;Clostridia;Clostridiales;Ruminococcaceae;?;?	0	0	0	0	0	0	0	0	0	1.25359	0	0	0	0	0	0	0	0	0	0	0	0	0	2.62612	0	0	0	0	0	0	0	0	0	0	0	0
OTU_1128	OTU_1128;Bacteria;Firmicutes;Clostridia;Clostridiales;Ruminococcaceae;?;?	0	0	0	0	0	0	0	0	0	0	0	0	0	0	0	0	0	0	0	0	0	0	0	0	0	0	0	0	0	2.0402	0	0	0	0	0	0
OTU_1129	OTU_1129;Bacteria;Firmicutes;Clostridia;Clostridiales;Ruminococcaceae;Oscillospira;?	0	0	0	2.40294	0	0	0	0	0	0	0	0	0	0	0	0	0	0	0	0	0	0	0	0	0	0	0	0	0	0	0	0	0.813487	0	0	0
OTU_1130	OTU_1130;Bacteria;Firmicutes;Clostridia;Clostridiales;Ruminococcaceae;?;?	0	0	0	0	0	0	0	0	0	0	0	0	0	0	0	0	0	0	0	0	0	0	0	0	0	0	0	0	0	0	0	2.36426	0	0	0	0
OTU_1131	OTU_1131;Bacteria;Bacteroidetes;Bacteroidia;Bacteroidales;[Paraprevotellaceae];[Prevotella];?	0	0	0	0	0	0	0	0	0	0	0	0	0	0	0	0	0	0	0	0	0	0	0	0	0	0	0	0	1.72468	0	0	0	0	0	0.655242	0
OTU_1132	OTU_1132;Bacteria;Verrucomicrobia;Verrucomicrobiae;Verrucomicrobiales;Verrucomicrobiaceae;Akkermansia;muciniphila	0	0	0	0	0	0	0	0	0	2.98582	0	0	0	0	0	0	0	0	0	0	0	0	0	0	0	0	0	0	0	0	0	0	0	0	0	0
OTU_1133	OTU_1133;Bacteria;Firmicutes;Clostridia;Clostridiales;?;?;?	0	0	2.13674	0	0	0	0	0	0	0	0	0	0	0	0	0	0	0	0	0	0	0	0	1.19749	0	0	0	0	0	0	0	0	0	0	0	0
OTU_1137	OTU_1137;Bacteria;Bacteroidetes;Bacteroidia;Bacteroidales;S24-7;?;?	0	0	0	0	0	0	0	0	0	0	0	0	0	0	0	0	0	0	0	0	0	0	0	0	0	0	0	0	0	0	1.55458	0	0	0	1.10418	0
OTU_1138	OTU_1138;Bacteria;Bacteroidetes;Bacteroidia;Bacteroidales;S24-7;?;?	0	0	0	0	0	0	0	0	0	0	0	0	0	0	0	0	0	0	0	0	0	1.50936	0	0	0	0	0	0	0.656514	0	1.19639	0	0	0	0	0
OTU_1139	OTU_1139;Bacteria;Firmicutes;Clostridia;Clostridiales;Ruminococcaceae;Oscillospira;?	0	0	0	0	0	0	0	0	0	0	0	0	0	0	0	0	0	0	0	0	0	0	0	0	0	0	0	0	0	2.0402	0	0	0	0	0	0
OTU_1140	OTU_1140;Bacteria;Firmicutes;Clostridia;Clostridiales;Ruminococcaceae;?;?	0	0	1.82711	1.05117	0	0	0	0	0	0	0	0	0	0	0	0	0	0	0	0	0	0.943674	0	0	0	0	0	0	0	0	0	0	0	0	0	0
OTU_1148	OTU_1148;Bacteria;Firmicutes;Clostridia;Clostridiales;Ruminococcaceae;Oscillospira;?	0	1.3788	0	0	0	0	0	0	0	0	0	0	0	0	0	2.80269	0	0	0	0	0	0	0	0	0	0	0	0	0	0	0	0	0	0	0	0
OTU_1149	OTU_1149;Bacteria;Proteobacteria;Gammaproteobacteria;Enterobacteriales;Enterobacteriaceae;Proteus;?	0	0	0	0	0	0	0	0	0	0	0	2.9117	0	0	0	0	0	0	0	0	1.09575	0	1.04074	0	0	0	0	0	0	0	0	0	0	0	0	0
OTU_1153	OTU_1153;Bacteria;Firmicutes;Clostridia;Clostridiales;Ruminococcaceae;Oscillospira;?	0	0	0	0	0	0	0	0	0	0	0	0	0	0	0	0	0	0	0	0	0	0	0	0	0	0	0	2.95821	0	0	0	0	0	0	0	0
OTU_1154	OTU_1154;Bacteria;Firmicutes;Clostridia;Clostridiales;Christensenellaceae;?;?	0	0	0	0	0	0	0	0	0	1.25359	0	0	0	0	0	0	1.94972	0	1.05802	0	0	0	0	0	0	0	0	0	0	0	0	0	0	0	0	0
OTU_1157	OTU_1157;Bacteria;Firmicutes;Clostridia;Clostridiales;Ruminococcaceae;Oscillospira;?	0	1.3788	0	0	0	0	0	0	2.41475	0	0	0	0	0	0	0	0	0	0	0	0	0	0	0	0	0	0	0	0	0	0	0	0	0	0	0
OTU_1158	OTU_1158;Bacteria;Proteobacteria;Betaproteobacteria;Burkholderiales;Oxalobacteraceae;?;?	0	0	0	0	0	0	0	0	0	0	0	0	0	0	0	0	0	0	0	1.77559	0	0	0	2.28694	0	0	0	0	0	0	0	0	0	0	0	0
OTU_1159	OTU_1159;Bacteria;Bacteroidetes;Bacteroidia;Bacteroidales;Porphyromonadaceae;Parabacteroides;?	0	0	0	0	0	0	0	0	0	0	0	0	0	0	0	0	0	0	0	0	0	0	0	0	0	0	0	2.95821	0	0	0	0	0	0	0	0
OTU_1162	OTU_1162;Bacteria;Firmicutes;Clostridia;Clostridiales;Ruminococcaceae;?;?	0	0	0	0	0	0	0	0	0	0	0	0	0	0	0	0	1.94972	0.994296	0	0	0	0	0	0	0	1.00043	0	0	0	0	0	0	0	0	0	0
OTU_1165	OTU_1165;Bacteria;Firmicutes;Clostridia;Clostridiales;Ruminococcaceae;Oscillospira;?	0	0	0	0	0	0	0	0	0	0	0	0	0	0	0	0	0	0	0	0	0	0	0	0	0	0	0	0	0	2.0402	0	0	0	0	0	0
OTU_1167	OTU_1167;Bacteria;Tenericutes;Mollicutes;RF39;?;?;?	0	0	0	0	0	0	0	0	0	0	0	0	0	0	0	0	0	0	2.6804	0	0	0	0	0	0	0	0	0	0	0	0	0	0	0	0	0
OTU_1168	OTU_1168;Bacteria;Firmicutes;Clostridia;Clostridiales;Lachnospiraceae;?;?	0	0	0	0	0	0	0	0	0	0	0	0	0	3.53827	0	0	0	0	0	0	0	0	0	0	0	0	0	0	0	0	0	0	0	0	0	0
OTU_1171	OTU_1171;Bacteria;Firmicutes;Clostridia;Clostridiales;Ruminococcaceae;?;?	0	0	0	0	0	0	0	0	0	0	0	0	0	0	3.47555	0	0	0	0	0	0	0	0	0	0	0	0	0	0	0	0	0	0	0	0	0
OTU_1173	OTU_1173;Bacteria;Firmicutes;Clostridia;Clostridiales;?;?;?	0	0	0.887072	0	0	0	0	0	0	0	0	0	0	1.6432	0	0	0	0	2.08617	0	0	0	0	0	0	0	0	0	0	0	0	0	0	0	0	0
OTU_1175	OTU_1175;Bacteria;TM6;SJA-4;?;?;?;?	1.78375	0	0	0	0	0	0	0	0	0	0	0	0	0	0	0	0	0	1.66181	0	0	0	0	0	0	0	0	0	0	0	0	0	0	0	0	0
OTU_1176	OTU_1176;Bacteria;Firmicutes;Clostridia;Clostridiales;?;?;?	0	0	0	0	0	0	0	0	0	0	0	0	0	0	0	0	0	0	0	0	0	0	0	0	0.937883	0	0	0	0	0	0	1.80295	0	0.754146	0	0
OTU_1177	OTU_1177;Bacteria;Firmicutes;Clostridia;Clostridiales;?;?;?	0	0	1.43234	0	0	0	0	0	0	0	0	0	0	0	0	0	0	0	0	0	0	0	0	0	0	0	0	0	0	0	1.55458	0	0	0	0	0
OTU_1178	OTU_1178;Bacteria;Bacteroidetes;Bacteroidia;Bacteroidales;S24-7;?;?	0	0	0	0	0	0	1.76215	0	0	0	0	0	0	0	0	0	0	0	0	0	0	0	0	0	0	0	0	0	0	0	0	0	0	0	1.10418	0
OTU_1180	OTU_1180;Bacteria;Firmicutes;Clostridia;Clostridiales;Lachnospiraceae;?;?	0	0	0	0	0	0	0	0	0	0	0	0	0	0	0	0	0	0	0	0	0	0	0	0	0	0	0	0	0.656514	1.51995	0	0	0	0	0	0
OTU_1184	OTU_1184;Bacteria;Firmicutes;Clostridia;Clostridiales;[Mogibacteriaceae];?;?	0	0	0	0	0	0	0	0	0	0	0	0	0	0	0	0	0	0	0	0	0	0	2.38657	0	0	0	0	0	0	0	0	0	0	0	0	0
OTU_1185	OTU_1185;Bacteria;Firmicutes;Clostridia;Clostridiales;Ruminococcaceae;?;?	0	0	0	0	0	0	0	0	0	0	0	0	0	0	0	0	0	0	0	0	0	0	0	0	0	0	0	0	0	0	0	2.11073	0	0	0	0
OTU_1186	OTU_1186;Bacteria;Firmicutes;Clostridia;Clostridiales;Ruminococcaceae;Oscillospira;?	0	0	0	0	0	0	0	0	0	0	0	0	0	0	0	0	0	0	0	0	0	0	0	0	0	0	0	0	0	0	0	2.11073	0	0	0	0
OTU_1188	OTU_1188;Bacteria;Bacteroidetes;Bacteroidia;Bacteroidales;S24-7;?;?	0	0	0	0	0	0	0	0	0	0	0	0	0	0	0	0	0	0	0	0	0	0	0	0	0	0	0	0	0	0	0	0	0	0	1.72226	0
OTU_1189	OTU_1189;Bacteria;Firmicutes;Clostridia;Clostridiales;Ruminococcaceae;Oscillospira;?	0	0	0	0	0	0	0	0	0	0	0	0	0	0	0	0	0	0	0	0	0	0	0	0	0	0	0	0	0	0	0	2.11073	0	0	0	0
OTU_1191	OTU_1191;Bacteria;Bacteroidetes;Bacteroidia;Bacteroidales;S24-7;?;?	0	0	0	0	0	0	0.845868	0	1.9591	0	0	0	0	0	0	0	0	0	0	1.14528	0	0	0	0	0	0	0	0	0	0	0	0	0	0	0	0
OTU_1193	OTU_1193;Bacteria;Firmicutes;Clostridia;Clostridiales;?;?;?	1.78375	0	0	0	0	0	0	0	1.2893	0	0	0	0	0	0	0	0	0	0	0	0	0	0	0	0	0	0	0	0	0	0	0	0	0	0	0
OTU_1197	OTU_1197;Bacteria;Bacteroidetes;Bacteroidia;Bacteroidales;[Odoribacteraceae];Odoribacter;?	0	0	0	0	0	1.16898	0	0	0	0	0	0	0	0	0	0	0	0	0	0	0	0	0	1.19749	0	1.00043	1.24434	0	0	0	0	0	0	0	0	0
OTU_1198	OTU_1198;Bacteria;Firmicutes;Bacilli;Turicibacterales;Turicibacteraceae;Turicibacter;?	0	0	0	0	0	0	0	0	0	0	0	0	0	0	1.5968	0	0	0	0	0	0	0	0	2.28694	0	0	0	0	0	0	0	0	0	0	0	0
OTU_1199	OTU_1199;Bacteria;Firmicutes;Clostridia;Clostridiales;?;?;?	0	0	0	0	0	0	0	0	0	0	0	0	0	0	0	0	0	0	1.05802	0	0	0	0	0	0	0	0	0	0	0	0	0	1.71033	0	0	0
OTU_1202	OTU_1202;Bacteria;Firmicutes;Clostridia;Clostridiales;Ruminococcaceae;?;?	0	0	0	0	0	0	0	0	0	0	0	0	0	0	0	0	0	0	0	0	0	0	0	0	0	0	0	0	0.656514	0	0	0	0	0	0	1.6496
OTU_1204	OTU_1204;Bacteria;Bacteroidetes;Bacteroidia;Bacteroidales;Rikenellaceae;?;?	0	0	0	2.07608	0	0	0	0	0	0	0	0	0	0	0	0	0	0	0	0	0	0	0	0	0	0	0	0	0.656514	0	0	0	0	0	0	0
OTU_1208	OTU_1208;Bacteria;Firmicutes;Clostridia;Clostridiales;?;?;?	2.09004	0	0	0	0	0	0	0	0	0	0	0	0	0	0	0	0	0	0	0	0	0	0	0	0	0	0	0	0	0	0	0	0	0	0	0
OTU_1211	OTU_1211;Bacteria;Bacteroidetes;Bacteroidia;Bacteroidales;Rikenellaceae;?;?	0	0	0	0	0	0	2.06674	0	0	0	0	0	0	0	0	0	0	0	0	0	0	0	0	0	0	0	0	0	0	0	0	0	0	0	0	0
OTU_1212	OTU_1212;Bacteria;Bacteroidetes;Bacteroidia;Bacteroidales;S24-7;?;?	0	0	0	0	0	0	0	0	0	0	0	0	1.54909	0	0	0	0	0	0	0	0	0	0	0	0	0	0	0	0	0	1.55458	0	0	0	0	0
OTU_1213	OTU_1213;Bacteria;Firmicutes;Clostridia;Clostridiales;?;?;?	0	0	0	1.65279	0	0	0	0	0	1.91407	0	0	0	0	0	0	0	0	0	0	0	0	0	0	0	0	0	0	0	0	0	0	0	0	0	0
OTU_1217	OTU_1217;Bacteria;Bacteroidetes;Bacteroidia;Bacteroidales;?;?;?	0	0	0	0	0	0	0	0	0	0	0	0	0	0	0	0	0	0	0	0	0	0	0	0	0	0	0	0	1.72468	0	0	0	0	0	0	0
OTU_1218	OTU_1218;Bacteria;Firmicutes;Clostridia;Clostridiales;?;?;?	0	0	0	0	0	0	0	0	0	0	0	0	0	0	0	0	0	0	0	0	0	0	0	0	0	0	0	0	0	0	0	0	0	1.61348	0	0.776097
OTU_1221	OTU_1221;Bacteria;Firmicutes;Clostridia;Clostridiales;Peptostreptococcaceae;?;?	0	0	0	0	0	0	0	0	0	0	0	0	0	0	0	0	0	0	0	0	0	0	1.04074	0	0	0	0	0	0	0	0	0	0	0	1.44607	0
OTU_1222	OTU_1222;Bacteria;Tenericutes;Mollicutes;RF39;?;?;?	0	0	0	0	0	0	0	0	0	0	0	0	0	0	0	0	0	0	0	0	0	0	0	0	0	0	0	0	1.72468	0	0	0	0	0	0	0
OTU_1227	OTU_1227;Bacteria;Firmicutes;Clostridia;Clostridiales;?;?;?	0	0	0	0	0	0	0	0	2.76051	0	0	0	0	0	0	0	0	0	0	0	0	0	0	0	0	0	0	0	0	0	0	0	0	0	0	0
OTU_1228	OTU_1228;Bacteria;Firmicutes;Clostridia;Clostridiales;Ruminococcaceae;?;?	1.78375	0	0	0	0	0	0	0	0	0	0	0	0	0	0	0	0	0	0	0	0	0	0	0	0	0	0	0	0	0	0	0.871666	0	0	0	0
OTU_1229	OTU_1229;Bacteria;Firmicutes;Clostridia;Clostridiales;?;?;?	0	0	0	0	0	0	0	0	0	0	0	0	0	2.88181	0	0	0	0	0	0	0	0	0	0	0	0	0	0	0	0	0	0.871666	0	0	0	0
OTU_1230	OTU_1230;Bacteria;Proteobacteria;Gammaproteobacteria;Pseudomonadales;Pseudomonadaceae;Pseudomonas;veronii	0	0	0	1.65279	0	0	0	0	0	0	0	0	0	0	0	0	0	1.57735	0	0	0	0	0	0	0	0	0	0	0	0	0	0	0	0	0	0
OTU_1231	OTU_1231;Bacteria;Firmicutes;Clostridia;Clostridiales;Christensenellaceae;?;?	0	0	0	0	0	0	0	0	0	0	0	0	0	0	0	0	0	0	0	0	0	0	0	0	0	0	0	0	0	0	1.84129	0	0	0	0	0
OTU_1233	OTU_1233;Bacteria;Firmicutes;Erysipelotrichi;Erysipelotrichales;Erysipelotrichaceae;?;?	0	0	0	0	0	0	0	0	0	0	0	0	0	0	0	0	0	0	0	0	0	0	0	1.19749	0	0	0	0	1.10604	0.69831	0	0	0	0	0	0
OTU_1234	OTU_1234;Bacteria;Bacteroidetes;Bacteroidia;Bacteroidales;S24-7;?;?	0	0	0	0	0	0	0	0	2.76051	0	0	0	0	0	0	0	0	0	0	0	0	0	0	0	0	0	0	0	0	0	0	0	0	0	0	0
OTU_1235	OTU_1235;Bacteria;Firmicutes;Clostridia;Clostridiales;Ruminococcaceae;?;?	0	0	0	0	0	0	0	0	1.2893	0	0	0	0	0	0	0	0	0	0	0	0	0	0	0	0	0	0	0	0	0	0	1.80295	0	0	0	0
OTU_1237	OTU_1237;Bacteria;Verrucomicrobia;Verrucomicrobiae;Verrucomicrobiales;Verrucomicrobiaceae;Akkermansia;muciniphila	0	0	0	0	0	0	0	0	0	0	0	0	0	0	0	0	0	0	0	0	0	0	0	0	0	0	0	0	0.656514	0	0	0	1.33051	0	0	0.776097
OTU_1238	OTU_1238;Bacteria;Firmicutes;Clostridia;Clostridiales;?;?;?	0	0	1.43234	0	0	0	0	0	0	0	0	0	0	0	2.33612	0	0	0	0	0	0	0	0	0	0	0	0	0	0	0	0	0	0	0	0	0
OTU_1241	OTU_1241;Bacteria;Firmicutes;Clostridia;Clostridiales;?;?;?	0	0	0	0	0	0	0	0	0	0	0	0	0	0	0	0	0	0	0	0	0	0	0	0	0	0	0	0	0	0	0.718811	0	0	1.61348	0	0
OTU_1245	OTU_1245;Bacteria;Firmicutes;Clostridia;Clostridiales;Lachnospiraceae;?;?	0	0	0	0	0	0	0	1.78244	1.2893	0	0	0	0	0	0	0	0	0	1.05802	0	0	0	0	0	0	0	0	0	0	0	0	0	0	0	0	0
OTU_1250	OTU_1250;Bacteria;Firmicutes;Clostridia;Clostridiales;Ruminococcaceae;?;?	0	0	0	0	0	0	0	0	0	0	0	0	0	0	0	0	0	0	0	0	0	0	0	0	0	2.32261	0	0	0	0	0	0	0	0	0	0
OTU_1251	OTU_1251;Bacteria;Firmicutes;Clostridia;Clostridiales;?;?;?	0	0	0	0	0	0	0	0	0	0	0	0	0	0	0	0	0	0	0	0	0	0	0	0	0	0	0	0	0	0	1.84129	0	0	0	0	0
OTU_1252	OTU_1252;Bacteria;Firmicutes;Clostridia;Clostridiales;Veillonellaceae;Dialister;?	1.39441	0	0	0	0	0	0	0	0	0	0	0	0	0	0	0	1.54036	0	0	0	0	0	0	0	0	0	0	0	0	0	0	0	0	0	0	0
OTU_1253	OTU_1253;Bacteria;Firmicutes;Clostridia;Clostridiales;?;?;?	0	0	0.887072	0	0	0	0	0	0	0	0	0	0	0	0	0	0	0	0	0	0	1.91466	0	0	0	0	0	0	0	0	0	0	0	0	0	0
OTU_1258	OTU_1258;Bacteria;Deferribacteres;Deferribacteres;Deferribacterales;Deferribacteraceae;Mucispirillum;schaedleri	0	0	0	0	0	0	0	0	0	0	0	0	0	1.6432	0	0	0	0	0	1.14528	0	0	1.63903	0	0	0	0	0	0	0	0	0	0	0	0	0
OTU_1259	OTU_1259;Bacteria;Firmicutes;Clostridia;Clostridiales;Ruminococcaceae;Oscillospira;?	0	0	1.82711	0	0	0	0	0	0	0	0	0	0	0	0	0	0	0	0	0	0	0	0	0	0	0	0	0	0	0	0.718811	0	0	0	0	0
OTU_1263	OTU_1263;Bacteria;Firmicutes;Clostridia;Clostridiales;Ruminococcaceae;?;?	0	0	0	0	0	0	0	0	0	0	0	0	0	0	0	0	0	0	0	0	0	0	0	0	0	0	0	0	1.44827	0	0.718811	0	0	0	0	0
OTU_1264	OTU_1264;Bacteria;Firmicutes;Clostridia;Clostridiales;Ruminococcaceae;?;?	0	0	0	1.05117	0	0	0	0	0	0	0	0	0	0	0	0	0	0	0	1.14528	0	1.50936	0	0	0	0	0	0	0	0	0	0	0	0	0	0
OTU_1266	OTU_1266;Bacteria;Firmicutes;Clostridia;Clostridiales;Christensenellaceae;?;?	0	0	0	0	0	0	0	0	0	2.36543	0	0	0	0	0	0	0	0	0	0	0	0.943674	0	0	0	0	0	0	0	0	0	0	0	0	0	0
OTU_1268	OTU_1268;Bacteria;Firmicutes;Clostridia;Clostridiales;?;?;?	0	0	0	0	0	0	0	0	0	0	0	0	0	0	0	0	0	0	0	0	0	0	0	0	0	0	0	0	0	0	0	1.80295	0.813487	0	0	0
OTU_1269	OTU_1269;Bacteria;Firmicutes;Clostridia;Clostridiales;?;?;?	0	0	0	0	0	0	0	0	0	0	0	0	0	0	0	0	0	0	0	0	0	1.91466	1.04074	0	0	0	0	0	0	0	0	0	0	0	0	0
OTU_1270	OTU_1270;Bacteria;Firmicutes;Clostridia;Clostridiales;Ruminococcaceae;Oscillospira;?	0	0	0	0	0	0	0	0	0	0	0	0	0	0	0	0	0	0	2.41367	0	0	0	0	0	0	0	0	0	0	0	0	0	0	0	0	0
OTU_1276	OTU_1276;Bacteria;Firmicutes;Clostridia;Clostridiales;Lachnospiraceae;?;?	0	0	0	0	0	0	0	0	0	0	0	0	0	0	0	0	0	1.99144	0	1.14528	0	0	0	0	0	0	0	0	0	0	0	0	0	0	0	0
OTU_1278	OTU_1278;Bacteria;Bacteroidetes;Bacteroidia;Bacteroidales;S24-7;?;?	0	0	0	0	0	0	0	0	0	0	0	0	0	0	0	0	0	0	0	0	0	0	0	0	0	0	0	0	1.44827	0.69831	0	0	0	0	0	0
OTU_1279	OTU_1279;Bacteria;Firmicutes;Clostridia;Clostridiales;?;?;?	0	0	0	0	0	0	0	0	0	0	0	0	0	0	0	0	0	0	0	0	0	0	0	0	0	0	0	0	0	1.8034	0	0	0	0	0	0
OTU_1283	OTU_1283;Bacteria;Firmicutes;Clostridia;Clostridiales;Ruminococcaceae;?;?	0	0	0	0	0	0	0	0	0	0	0	0	0	0	0	0	0	0	0	0	0	2.23072	0	0	0	0	0	0	0	0	0	0	0	0	0	0
OTU_1284	OTU_1284;Bacteria;Firmicutes;Clostridia;Clostridiales;?;?;?	0	0	0	1.65279	0	0	0	0	0	0	0	0	0	0	0	0	0	0	0	0	1.71126	0	0	0	0	0	0	0	0	0	0	0	0	0	0	0
OTU_1288	OTU_1288;Bacteria;Actinobacteria;Actinobacteria;Actinomycetales;Corynebacteriaceae;?;?	0	0	0	0	0	0	0	0	0	0	0	0	0	0	0	0	0	0	2.08617	0	0	0	0	0	0	0	0	0	0	0	0	0	0.813487	0	0	0
OTU_1289	OTU_1289;Bacteria;Firmicutes;Clostridia;Clostridiales;?;?;?	0	0	0	0	0	0	0	0	0	0	0	0	0	0	0	0	0	0	0	0	0	0	0	0	0	0	0	0	1.44827	0	0	0	0	0.754146	0	0
OTU_1290	OTU_1290;Bacteria;Firmicutes;Clostridia;Clostridiales;Ruminococcaceae;?;?	0	0	0	0	0	0	0	0	0	0	0	0	0	0	0	0	0	0	0	0	0	0	0	0	0	0	0	0	0	1.8034	0	0	0	0	0	0
OTU_1291	OTU_1291;Bacteria;Firmicutes;Clostridia;Clostridiales;?;?;?	0	0	0	0	0	0	0	0	0	0	0	0	0	0	0	0	0	0	0	0	0	0	0	0	0	0	1.24434	0	0	0	0	0	0	0	1.44607	0
OTU_1293	OTU_1293;Bacteria;Firmicutes;Clostridia;Clostridiales;Christensenellaceae;?;?	0	0	0	0	0	0	0	0	0	1.25359	0	0	0	0	0	0	0	0	0	0	0	0	1.63903	0	0	0	0	0	0	0	0	0	0	0	0	0.776097
OTU_1296	OTU_1296;Bacteria;Firmicutes;Clostridia;Clostridiales;?;?;?	0	0	0	0	0	0	0	0	0	0	0	0	0	0	0	0	0	0	2.41367	0	0	0	0	0	0	0	0	0	0	0	0	0	0	0	0	0
OTU_1301	OTU_1301;Bacteria;Proteobacteria;Gammaproteobacteria;Xanthomonadales;Xanthomonadaceae;Stenotrophomonas;geniculata	0	0	0	0	0	0	0	0	0	0	0	0	0	0	0	0	0	0.994296	0	0	0	0	0	0	0	2.00064	0	0	0	0	0	0	0	0	0	0
OTU_1302	OTU_1302;Bacteria;Firmicutes;Clostridia;Clostridiales;?;?;?	0	0	0	0	0	0	0	0	0	0	0	0	0	0	0	0	0	0	0	0	0	0	0	0	0	0	0	0	0	0	0	0	0	0	1.44607	0.776097
OTU_1303	OTU_1303;Bacteria;Tenericutes;Mollicutes;Anaeroplasmatales;?;?;?	0	2.07074	0	0	0	0	0	0	0	0	0	0	0	0	0	0	0	0	0	0	0	0	0	0	0	0	0	0	0	0	0	0	0	0	0	0
OTU_1304	OTU_1304;Bacteria;Firmicutes;Clostridia;Clostridiales;?;?;?	1.39441	0	0	0	0	0	0	0	0	0	0	0	0	0	2.33612	0	0	0	0	0	0	0	0	0	0	0	0	0	0	0	0	0	0	0	0	0
OTU_1305	OTU_1305;Bacteria;Firmicutes;Clostridia;Clostridiales;?;?;?	1.78375	0	0	0	0	0	0	0	0	0	0	0	0	0	0	0	0	0	0	0	0	0	0	0	0.937883	0	0	0	0	0	0	0	0	0	0	0
OTU_1307	OTU_1307;Bacteria;Bacteroidetes;Bacteroidia;Bacteroidales;S24-7;?;?	0	0	0	0	0	0	0	0	2.41475	0	0	0	0	0	0	0	0	0	0	0	0	0	0	1.19749	0	0	0	0	0	0	0	0	0	0	0	0
OTU_1308	OTU_1308;Bacteria;Firmicutes;Erysipelotrichi;Erysipelotrichales;Erysipelotrichaceae;?;?	0	0	0	0	0	0	0	0	0	0	0	0	0	0	0	0	0	0	0	0	0	0	0	0	0	0	0	0	0	1.8034	0	0	0	0	0	0
OTU_1311	OTU_1311;Bacteria;Firmicutes;Clostridia;Clostridiales;Ruminococcaceae;?;?	0	0	0	0	0	0	0	0	0	0	0	0	0	0	0	0	0	0	0	0	0	0	0	0	0	0	0	0	0	0	0	2.11073	0	0	0	0
OTU_1313	OTU_1313;Bacteria;Firmicutes;Clostridia;Clostridiales;Ruminococcaceae;?;?	0	0	0	0	0	0	0	0	0	0	0	0	0	0	0	0	0	0	0	0	0	0	1.63903	0	0	0	0	0	0	0	1.19639	0	0	0	0	0
OTU_1314	OTU_1314;Bacteria;Firmicutes;Clostridia;Clostridiales;Ruminococcaceae;?;?	0	0	0	0	0	0	0	0	2.41475	0	0	0	0	0	0	0	0	0	0	0	0	0	0	0	0	0	0	0	0	0	0	0	0	0	0.655242	0
OTU_1315	OTU_1315;Bacteria;Bacteroidetes;Bacteroidia;Bacteroidales;S24-7;?;?	0	0	0	0	0	0	0	0	0	0	0	0	0	0	0	0	0	0	0	0	0	0	0	0	0	0	0	0	0	0	0	2.11073	0	0	0	0
OTU_1318	OTU_1318;Bacteria;Firmicutes;Clostridia;Clostridiales;Lachnospiraceae;?;?	0	0	0	0	0	0	0	0	0	0	0	0	0	0	0	2.31757	0	0	0	0	0	0	0	0	0	0	0	0	0	0	1.19639	0	0	0	0	0
OTU_1319	OTU_1319;Bacteria;Firmicutes;Clostridia;Clostridiales;?;?;?	0	0	0	0	0	0	0	0	0	0	0	0	0	0	0	0	0	0	0	0	0	0	0	0	2.22122	0	0	0	0	0	0	0	0	0	0	0
OTU_1320	OTU_1320;Bacteria;Bacteroidetes;?;?;?;?;?	0	0	0	0	0	0	0	0	0	0	0	0	0	0	0	0	0	0	0	0	0	0	0	0	0	0	0	0	1.44827	0	0	0	0.813487	0	0	0
OTU_1321	OTU_1321;Bacteria;Firmicutes;Clostridia;Clostridiales;Lachnospiraceae;?;?	0	0	0	0	0	0	0	0	0	0	0	0	0	0	0	0	0	0	0	0	0	0	0	0	0	0	0	2.68196	0	0	0	0	0	0	0	0
OTU_1322	OTU_1322;Bacteria;Bacteroidetes;Bacteroidia;Bacteroidales;Bacteroidaceae;Bacteroides;?	0	0	0	0	0	0	0	0	0	0	0	0	0	0	0	0	0	0	0	0	0	0	0	0	0	2.32261	0	0	0	0	0	0	0	0	0	0
OTU_1323	OTU_1323;Bacteria;Firmicutes;Clostridia;Clostridiales;[Mogibacteriaceae];?;?	0	0	0	0	0	0	0	0	0	0	0	0	0	0	0	0	0	0	0	0	0	0	0	0	0	0	0	0	0	0	1.84129	0	0	0	0	0
OTU_1324	OTU_1324;Bacteria;Firmicutes;Clostridia;Clostridiales;Ruminococcaceae;?;?	1.78375	0	0	0	0	0	0	0	0	0	0	0	0	0	0	0	0	0	0	0	0	0	0	0	0	0	0	0	0	0	0	0	0.813487	0	0	0
OTU_1326	OTU_1326;Bacteria;Firmicutes;Clostridia;Clostridiales;?;?;?	1.78375	0	0	0	0	0	0	0	0	0	0	0	0	0	0	0	0	0	0	0	1.09575	0	0	0	0	0	0	0	0	0	0	0	0	0	0	0
OTU_1329	OTU_1329;Bacteria;Proteobacteria;Gammaproteobacteria;Enterobacteriales;Enterobacteriaceae;Klebsiella;?	0	0	0	0	0	0	0	0	0	0	0	0	0	0	0	0	0	0	0	0	1.09575	0	1.63903	0	0	0	0	0	0	0	0	0	0	0	0	0
OTU_1334	OTU_1334;Bacteria;Firmicutes;Clostridia;?;?;?;?	0	0	0	0	0	0	0	0	0	0	0	0	0	0	0	0	0	0	0	0	0	0	0	0	0	0	0	0	0	0	1.55458	0	0	0	0	0
OTU_1339	OTU_1339;Bacteria;Actinobacteria;Actinobacteria;Actinomycetales;Corynebacteriaceae;Corynebacterium;stationis	0	0	0	0	0	0	0	0	0	0	0	0	0	0	0	0	0	0	2.08617	0	0	0	0	0	0	0	0	0	0	0	0	0	0	0	0	0
OTU_1341	OTU_1341;Bacteria;Bacteroidetes;Bacteroidia;Bacteroidales;S24-7;?;?	0	0	0	0	0	0	0	0	0	0	0	0	0	0	0	0	0	0	0	0	0	0	0	0	0	0	0	0	0	0	0	1.80295	0	0	0	0
OTU_1344	OTU_1344;Bacteria;Firmicutes;Clostridia;Clostridiales;Ruminococcaceae;?;?	0	0	0	0	0	0	0	0	0	0	0	0	0	0	0	0	0	0	0	0	0	0	0	0	0	0	0	0	0	0	1.55458	0	0	0	0	0
OTU_1352	OTU_1352;Bacteria;Firmicutes;Clostridia;Clostridiales;Ruminococcaceae;?;?	0	0	0	0	0	0	0	0	0	0	0	0	0	0	0	0	0	0	0	0	0	0	0	2.28694	0	0	0	0	0	0	0	0	0	0	0	0
OTU_1354	OTU_1354;Bacteria;Firmicutes;Bacilli;Lactobacillales;Lactobacillaceae;Lactobacillus;?	0	0	0	0	0	0	0	0	0	0	0	0	0	0	0	0	0	0	0	0	0	0	0	0	0	0	0	0	1.44827	0	0	0	0	0	0	0
OTU_1356	OTU_1356;Bacteria;Firmicutes;Clostridia;Clostridiales;?;?;?	0	0	0	0	0	0	0	0	0	0	0	0	0	0	0	0	0	0	0	0	0	0	0	0	0	0	0	0	0	0	0	1.80295	0	0	0	0
OTU_1357	OTU_1357;Bacteria;Firmicutes;Clostridia;Clostridiales;?;?;?	0	0	1.82711	0	0	0	0	0	0	0	0	0	0	0	0	0	0	0	0	0	0	0	0	0	0	0	0	0	0	0	0	0	0	0	0	0
OTU_1358	OTU_1358;Bacteria;Firmicutes;Clostridia;Clostridiales;?;?;?	0	0	0	0	0	0	0	0	0	0	0	0	0	0	0	0	0	0	0	0	0	0	0	2.28694	0	0	0	0	0	0	0	0	0	0	0	0
OTU_1360	OTU_1360;Bacteria;Firmicutes;Clostridia;Clostridiales;Clostridiaceae;?;?	0	0	0	0	0	0	0	0	0	0	0	0	0	0	0	0	0	0	0	0	1.71126	0	0	0	0	0	0	0	0	0	0	0	0	0	0.655242	0
OTU_1361	OTU_1361;Bacteria;Firmicutes;Clostridia;Clostridiales;Ruminococcaceae;Oscillospira;?	0	1.76586	0	0	0	0	0	0	0	0	0	0	0	0	0	0	0	0	0	0	0	0	0	0	0	0	0	0	0	0	0	0	0	0	0	0
OTU_1363	OTU_1363;Bacteria;Firmicutes;Clostridia;Clostridiales;Lachnospiraceae;Dorea;?	0	0	0	0	0	0	0	0	0	0	0	0	0	0	0	0	0	0	0	0	2.14134	0	0	0	0	0	0	0	0	0	0	0	0	0	0	0
OTU_1370	OTU_1370;Bacteria;Bacteroidetes;Bacteroidia;Bacteroidales;Porphyromonadaceae;Parabacteroides;?	0	0	0	0	2.00667	0	0	0	0	0	0	0	0	0	0	0	0	0	0	0	0	0	0	0	0	0	0	0	0	0	0	0	0	0	0	0
OTU_1372	OTU_1372;Bacteria;Firmicutes;Clostridia;Clostridiales;?;?;?	0	0	0	0	0	0	0	0	0	0	0	0	0	0	0	0	0	0	0	0	0	0	0	0	0	0	0	0	0	0	1.55458	0	0	0	0	0
OTU_1373	OTU_1373;Bacteria;Firmicutes;Clostridia;Clostridiales;Lachnospiraceae;?;?	0	0	0	0	0	0	0	0	0	0	0	0	0	0	0	0	0	0	0	0	0	0	0	0	1.90579	0	0	0	0	0	0	0	0	0	0	0
OTU_1377	OTU_1377;Bacteria;Firmicutes;Clostridia;Clostridiales;Dehalobacteriaceae;?;?	0	0	0	2.07608	0	0	0	0	0	0	0	0	0	0	0	0	0	0	0	0	0	0	0	0	0	0	0	0	0	0	0	0	0	0	0	0
OTU_1378	OTU_1378;Bacteria;Bacteroidetes;Bacteroidia;Bacteroidales;Rikenellaceae;?;?	0	0	0	0	0	0	0	0	0	0	0	0	0	0	0	0	0	0	0	0	0	0	0	0	0	0	2.35257	0	0	0	0	0	0	0	0	0
OTU_1379	OTU_1379;Bacteria;Firmicutes;Clostridia;Clostridiales;?;?;?	1.78375	0	0	0	0	0	0	0	0	0	0	0	0	0	0	0	0	0	0	0	0	0	0	0	0	0	0	0	0	0	0	0	0	0	0	0
OTU_1380	OTU_1380;Bacteria;Tenericutes;Mollicutes;RF39;?;?;?	0	0	0	0	0	0	0	0	0	0	0	0	0	0	0	0	0	0	0	0	0	0	0	0	0	0	0	0	0	0	0	1.80295	0	0	0	0
OTU_1381	OTU_1381;Bacteria;Firmicutes;Clostridia;Clostridiales;Ruminococcaceae;Oscillospira;?	1.78375	0	0	0	0	0	0	0	0	0	0	0	0	0	0	0	0	0	0	0	0	0	0	0	0	0	0	0	0	0	0	0	0	0	0	0
OTU_1382	OTU_1382;Bacteria;Bacteroidetes;Bacteroidia;Bacteroidales;S24-7;?;?	0	0	0	0	0	0	0	0	0	0	0	0	0	0	0	0	0	0	0	0	0	0	0	0	1.90579	0	0	0	0	0	0	0	0	0	0	0
OTU_1386	OTU_1386;Bacteria;Bacteroidetes;Bacteroidia;Bacteroidales;S24-7;?;?	0	0	0	0	0	0	0	0	0	0	0	0	0	0	0	0	0	0	0	0	0	0	0	0	0	0	0	0	0	0	1.55458	0	0	0	0	0
OTU_1389	OTU_1389;Bacteria;Firmicutes;Clostridia;Clostridiales;Lachnospiraceae;Coprococcus;?	0	0	0	0	0	0	0	0	0	0	0	0	0	0	0	0	0	0	0	0	0	0	0	0	0	0	0	0	0	0	0	0	0	0	1.44607	0
OTU_1395	OTU_1395;Bacteria;Firmicutes;Clostridia;Clostridiales;Ruminococcaceae;?;?	0	0	0	0	0	0	0	0	0	0	0	0	0	0	0	0	0	0	0	0	0	0	0	0	0	0	0	0	0	0	0	0	1.71033	0	0	0
OTU_1396	OTU_1396;Bacteria;Firmicutes;Clostridia;Clostridiales;Christensenellaceae;?;?	0	0	0	0	0	0	0	0	0	0	0	0	0	0	0	2.80269	0	0	0	0	0	0	0	0	0	0	0	0	0	0	0	0	0	0	0	0
OTU_1398	OTU_1398;Bacteria;Firmicutes;Clostridia;Clostridiales;?;?;?	0	0	0	0	0	0	0	0	0	0	0	0	1.54909	0	0	0	1.54036	0	0	0	0	0	0	0	0	0	0	0	0	0	0	0	0	0	0	0
OTU_1399	OTU_1399;Bacteria;Firmicutes;Clostridia;Clostridiales;Ruminococcaceae;Ruminococcus;?	0	0	0	0	0	0	0	0	0	0	0	2.9117	0	0	0	0	0	0	0	0	0	0	0	0	0	0	0	0	0	0	0	0	0	0	0	0
OTU_1400	OTU_1400;Bacteria;Bacteroidetes;Bacteroidia;Bacteroidales;S24-7;?;?	0	0	1.82711	0	0	0	0	0	0	0	0	0	0	0	0	0	0	0	0	0	0	0	0	0	0	0	0	0	0	0	0	0	0	0	0	0
OTU_1402	OTU_1402;Bacteria;Bacteroidetes;Bacteroidia;Bacteroidales;S24-7;?;?	0	0	0	0	0	0	0	0	0	0	0	0	0	0	0	0	0	0	0	0	0	0	0	0	0	0	0	0	0	0	0	1.80295	0	0	0	0
OTU_1405	OTU_1405;Bacteria;Firmicutes;Bacilli;Bacillales;Paenibacillaceae;Paenibacillus;?	0	0	0	0	0	0	0	0	0	0	0	0	2.76106	0	0	0	0	0	0	0	0	0	0	0	0	0	0	0	0	0	0	0	0	0	0	0
OTU_1409	OTU_1409;Bacteria;Firmicutes;Clostridia;Clostridiales;Ruminococcaceae;Oscillospira;?	0	0	0	0	0	0	0	0	0	2.36543	0	0	0	0	0	0	0	0	0	0	0	0	0	0	0	0	0	0	0	0	0	0	0	0	0	0
OTU_1411	OTU_1411;Bacteria;Firmicutes;Clostridia;Clostridiales;?;?;?	0.859495	0	0	0	0	0	0	0	0	0	0	0	0	0	0	0	0	0	0	0	1.71126	0	0	0	0	0	0	0	0	0	0	0	0	0	0	0
OTU_1413	OTU_1413;Bacteria;Firmicutes;Clostridia;Clostridiales;Ruminococcaceae;Oscillospira;?	0	0	0	0	0	0	0	0	0	0	0	0	0	0	0	0	0	0	0	0	0	1.91466	0	0	0	0	0	0	0	0	0	0	0	0	0	0
OTU_1417	OTU_1417;Bacteria;Firmicutes;Clostridia;Clostridiales;Lachnospiraceae;Blautia;?	0	0	0	2.07608	0	0	0	0	0	0	0	0	0	0	0	0	0	0	0	0	0	0	0	0	0	0	0	0	0	0	0	0	0	0	0	0
OTU_1421	OTU_1421;Bacteria;Firmicutes;Clostridia;Clostridiales;Ruminococcaceae;Ruminococcus;?	0	0	0	0	0	0	0	0	0	0	0	0	0	0	0	0	0	0	0	0	0	0	0	0	0	0	0	0	0	0	0	1.80295	0	0	0	0
OTU_1422	OTU_1422;Bacteria;Firmicutes;Clostridia;Clostridiales;?;?;?	1.78375	0	0	0	0	0	0	0	0	0	0	0	0	0	0	0	0	0	0	0	0	0	0	0	0	0	0	0	0	0	0	0	0	0	0	0
OTU_1424	OTU_1424;Bacteria;Firmicutes;Erysipelotrichi;Erysipelotrichales;Erysipelotrichaceae;?;?	0	0	0	0	0	0	0	0	0	0	0	0	0	0	0	0	0	0	2.08617	0	0	0	0	0	0	0	0	0	0	0	0	0	0	0	0	0
OTU_1425	OTU_1425;Bacteria;Firmicutes;Erysipelotrichi;?;?;?;?	0	0	0	0	0	0	0	0	0	0	0	0	0	0	0	0	0	0	0	0	0	0	0	0	0	0	0	0	0	0	1.55458	0	0	0	0	0
OTU_1427	OTU_1427;Bacteria;Firmicutes;Clostridia;Clostridiales;Ruminococcaceae;?;?	1.39441	0	0	0	0	0	0	0	0	0	0	0	0	0	0	0	0	0	0	0	0	0	1.04074	0	0	0	0	0	0	0	0	0	0	0	0	0
OTU_1431	OTU_1431;Bacteria;Bacteroidetes;Bacteroidia;Bacteroidales;S24-7;?;?	0	0	0	0	0	0	1.76215	0	0	0	0	0	0	0	0	0	0	0	0	0	0	0	0	0	0	0	0	0	0	0	0	0	0	0	0	0
OTU_1432	OTU_1432;Bacteria;Bacteroidetes;Bacteroidia;Bacteroidales;S24-7;?;?	0	0	0	0	0	0	0	0	0	0	0	0	0	0	0	0	0.966677	1.57735	0	0	0	0	0	0	0	0	0	0	0	0	0	0	0	0	0	0
OTU_1433	OTU_1433;Bacteria;Bacteroidetes;Bacteroidia;Bacteroidales;Bacteroidaceae;Bacteroides;?	0	0	0	0	0	0	0	0	0	0	0	0	0	0	0	0	0	0	0	0	0	0	0	0	0	0	0	0	0	0	1.19639	0	0.813487	0	0	0
OTU_1444	OTU_1444;Bacteria;Firmicutes;Clostridia;Clostridiales;Lachnospiraceae;Blautia;producta	0	0	0	0	0	0	0	0	0	0	0	0	0	0	0	0	0	0	0	0	0	0	0	2.28694	0	0	0	0	0	0	0	0	0	0	0	0
OTU_1445	OTU_1445;Bacteria;Firmicutes;Clostridia;Clostridiales;Lachnospiraceae;?;?	0	0	0	0	0	0	0	0	0	0	0	0	0	0	0	0	0	0	0	0	0	0	0	0	0	0	0	0	0	0	0	0	0	0	0	1.6496
OTU_1447	OTU_1447;Bacteria;Firmicutes;Clostridia;Clostridiales;?;?;?	0	0	0	0	0	0	0	0	0	0	0	0	0	0	0	0	0	0	0	0	0	0	0	0	0	0	0	0	0	0	1.55458	0	0	0	0	0
OTU_1448	OTU_1448;Bacteria;Firmicutes;Clostridia;?;?;?;?	1.78375	0	0	0	0	0	0	0	0	0	0	0	0	0	0	0	0	0	0	0	0	0	0	0	0	0	0	0	0	0	0	0	0	0	0	0
OTU_1450	OTU_1450;Bacteria;Firmicutes;Clostridia;Clostridiales;Ruminococcaceae;?;?	0	0	0	0	0	0	0	0	0	0	0	0	0	0	0	0	0	0	0	2.21278	0	0	0	0	0	0	0	0	0	0	0	0	0	0	0	0
OTU_1451	OTU_1451;Bacteria;Firmicutes;Clostridia;Clostridiales;Ruminococcaceae;?;?	0	0	0	0	0	0	0	0	0	0	0	0	0	0	0	0	0	0	0	0	0	0	0	0	0	0	0	0	0	0	0	0	0	1.61348	0	0
OTU_1452	OTU_1452;Bacteria;Firmicutes;Bacilli;Lactobacillales;Streptococcaceae;Streptococcus;?	0	0	0	0	0	0	0	0	0	0	0	0	0	0	0	0	0	0	0	0	0	0	0	0	0	0	0	0	0	1.51995	0	0	0	0	0	0
OTU_1453	OTU_1453;Bacteria;Firmicutes;Clostridia;Clostridiales;Ruminococcaceae;?;?	0	0	0	0	0	0	0	0	0	0	0	0	0	0	0	2.80269	0	0	0	0	0	0	0	0	0	0	0	0	0	0	0	0	0	0	0	0
OTU_1456	OTU_1456;Bacteria;Firmicutes;Clostridia;Clostridiales;Ruminococcaceae;?;?	0	0	0	0	0	0	0	0	1.2893	0	0	0	0	0	0	0	0	0	0	0	0	0	0	0	0	0	0	0	0	0	0	0	0	0	1.10418	0
OTU_1458	OTU_1458;Bacteria;Firmicutes;Clostridia;Clostridiales;Ruminococcaceae;?;?	0	0	0	0	0	0	0	0	0	0	0	0	0	0	0	0	0	0	0	0	0	0	0	0	0	0	0	0	0	0	0	0	0	0	1.44607	0
OTU_1462	OTU_1462;Bacteria;Firmicutes;Clostridia;Clostridiales;Ruminococcaceae;?;?	0	0	0	0	0	0	0	0	0	0	0	0	0	0	0	0	0	0	2.08617	0	0	0	0	0	0	0	0	0	0	0	0	0	0	0	0	0
OTU_1464	OTU_1464;Bacteria;Firmicutes;Clostridia;Clostridiales;?;?;?	0	0	0	0	0	0	0	0	0	0	0	0	0	0	0	0	0	0	0	0	0	0	0	0	0	0	0	0	0	0	0	0	0	0	1.44607	0
OTU_1465	OTU_1465;Bacteria;Bacteroidetes;Bacteroidia;Bacteroidales;Rikenellaceae;?;?	0	0	0	0	0	0	0	0	0	0	0	0	0	0	0	0	0	0	0	0	0	0	0	0	0	0	0	0	0	0	0	1.80295	0	0	0	0
OTU_1466	OTU_1466;Bacteria;Firmicutes;Clostridia;Clostridiales;Ruminococcaceae;?;?	0	0	0	0	0	0	0	0	0	0	0	0	2.76106	0	0	0	0	0	0	0	0	0	0	0	0	0	0	0	0	0	0	0	0	0	0	0
OTU_1471	OTU_1471;Bacteria;Firmicutes;Clostridia;Clostridiales;Ruminococcaceae;?;?	0	0	0	0	0	0	0	0	0	0	0	0	0	0	0	0	0	0	1.66181	0	1.09575	0	0	0	0	0	0	0	0	0	0	0	0	0	0	0
OTU_1472	OTU_1472;Bacteria;Firmicutes;Clostridia;Clostridiales;?;?;?	0	0	0	0	0	0	0	0	0	0	0	0	0	0	0	0	0	0	0	0	0	1.91466	0	0	0	0	0	0	0	0	0	0	0	0	0	0
OTU_1479	OTU_1479;Bacteria;Actinobacteria;Actinobacteria;Actinomycetales;Mycobacteriaceae;Mycobacterium;?	0	0	0	0	0	0	0	0	2.41475	0	0	0	0	0	0	0	0	0	0	0	0	0	0	0	0	0	0	0	0	0	0	0	0	0	0	0
OTU_1480	OTU_1480;Bacteria;Firmicutes;Clostridia;Clostridiales;?;?;?	0	0	0	0	0	0	0	0	0	0	0	0	0	0	0	0	0	0	0	0	0	0	0	0	0	0	0	0	0	1.16685	0	0	0.813487	0	0	0
OTU_1487	OTU_1487;Bacteria;Firmicutes;Clostridia;Clostridiales;Ruminococcaceae;Oscillospira;?	0	0	0	0	0	0	0	1.15059	0	0	0	0	0	0	0	0	0	0	0	0	0	0	0	0	0	0	0	0	0	0	1.19639	0	0	0	0	0
OTU_1488	OTU_1488;Bacteria;Firmicutes;Clostridia;Clostridiales;Ruminococcaceae;Oscillospira;?	0	0	0	0	0	0	0	0	0	0	0	0	0	0	2.82256	0	0	0	0	0	0	0	0	0	0	0	0	0	0	0	0	0	0	0	0	0
OTU_1489	OTU_1489;Bacteria;Proteobacteria;Gammaproteobacteria;Enterobacteriales;Enterobacteriaceae;?;?	0	0	0	0	0	0	0	0	0	0	0	0	0	0	0	0	0	0	0	0	2.14134	0	0	0	0	0	0	0	0	0	0	0	0	0	0	0
OTU_1491	OTU_1491;Bacteria;Actinobacteria;Coriobacteriia;Coriobacteriales;Coriobacteriaceae;Adlercreutzia;?	0	0	1.82711	0	0	0	0	0	0	0	0	0	0	0	0	0	0	0	0	0	0	0	0	0	0	0	0	0	0	0	0	0	0	0	0	0
OTU_1492	OTU_1492;Bacteria;Firmicutes;Clostridia;Clostridiales;?;?;?	0	0	0	0	0	0	0	0	0	0	0	0	0	0	0	0	0	0	0	0	0	0	0	0	0	0	0	0	0	0	0	1.80295	0	0	0	0
OTU_1493	OTU_1493;Bacteria;Firmicutes;Clostridia;Clostridiales;Peptostreptococcaceae;?;?	0	0	0	0	0	0	0	0	0	0	0	0	0	0	0	0	0	0	0	0	0	0	0	0	1.90579	0	0	0	0	0	0	0	0	0	0	0
OTU_1494	OTU_1494;Bacteria;Firmicutes;Clostridia;?;?;?;?	1.39441	0.848202	0	0	0	0	0	0	0	0	0	0	0	0	0	0	0	0	0	0	0	0	0	0	0	0	0	0	0	0	0	0	0	0	0	0
OTU_1497	OTU_1497;Bacteria;Firmicutes;Clostridia;?;?;?;?	0	1.3788	0	0	0	0	0	0	0	1.25359	0	0	0	0	0	0	0	0	0	0	0	0	0	0	0	0	0	0	0	0	0	0	0	0	0	0
OTU_1498	OTU_1498;Bacteria;Bacteroidetes;Bacteroidia;Bacteroidales;Rikenellaceae;?;?	0	0	0	0	0	0	0	0	0	0	0	0	0	0	0	0	0	0	0	0	0	0	0	0	0	0	0	0	1.44827	0	0	0	0	0	0	0
OTU_1499	OTU_1499;Bacteria;SR1;?;?;?;?;?	0	0	0	2.07608	0	0	0	0	0	0	0	0	0	0	0	0	0	0	0	0	0	0	0	0	0	0	0	0	0	0	0	0	0	0	0	0
OTU_1506	OTU_1506;Bacteria;Firmicutes;Clostridia;Clostridiales;?;?;?	0	0	0	0	0	0	0	0	0	0	0	0	0	0	0	0	0	0	0	0	0	0	0	0	0.937883	1.58553	0	0	0	0	0	0	0	0	0	0
OTU_1507	OTU_1507;Bacteria;Firmicutes;Erysipelotrichi;?;?;?;?	0	0	0	0	0	0	0	0	0	0	0	0	0	0	0	0	0	0	0	0	0	1.50936	1.04074	0	0	0	0	0	0	0	0	0	0	0	0	0
OTU_1508	OTU_1508;Bacteria;Firmicutes;Clostridia;Clostridiales;?;?;?	0	0	0	0	0	0	0	0	0	0	0	0	0	0	0	0	0	0	0	0	0	0	0	0	0	0	0	0	0	0	1.55458	0	0	0	0	0
OTU_1509	OTU_1509;Bacteria;Bacteroidetes;Bacteroidia;Bacteroidales;S24-7;?;?	0	0	0	0	0	0	1.37556	0	0	0	0	0	0	0	0	0	0	0	0	0	0	0	0	0	0	0	0	0	0	0	0	0	0	0	0.655242	0
OTU_1511	OTU_1511;Bacteria;Firmicutes;Clostridia;Clostridiales;Lachnospiraceae;?;?	0	0	0	0	0	0	0	0	0	0	0	0	0	0	0	0	0	0	0	0	0	0	0	0	0	0	0	0	0	0	1.55458	0	0	0	0	0
OTU_1514	OTU_1514;Bacteria;Firmicutes;Clostridia;Clostridiales;Lachnospiraceae;Coprococcus;?	0	0	0	0	0	0	0	0	0	0	0	0	0	0	0	0	0	1.99144	0	0	0	0	0	0	0	0	0	0	0	0	0	0	0	0	0	0
OTU_1517	OTU_1517;Bacteria;Firmicutes;Clostridia;Clostridiales;Lachnospiraceae;Coprococcus;?	0	0	0	0	2.00667	0	0	0	0	0	0	0	0	0	0	0	0	0	0	0	0	0	0	0	0	0	0	0	0	0	0	0	0	0	0	0
OTU_1519	OTU_1519;Bacteria;Actinobacteria;Actinobacteria;Actinomycetales;Microbacteriaceae;Agromyces;?	0	0	0	0	0	0	0	0	0	0	0	0	2.76106	0	0	0	0	0	0	0	0	0	0	0	0	0	0	0	0	0	0	0	0	0	0	0
OTU_1520	OTU_1520;Bacteria;Cyanobacteria;4C0d-2;YS2;?;?;?	0	0	0	0	0	0	0	0	0	0	0	0	0	0	0	0	0	0	0	0	0	0	0	0	0	0	0	0	0	1.51995	0	0	0	0	0	0
OTU_1524	OTU_1524;Bacteria;Firmicutes;Clostridia;Clostridiales;?;?;?	1.39441	0	0	0	0	0	0	0	0	0	0	0	0	0	1.5968	0	0	0	0	0	0	0	0	0	0	0	0	0	0	0	0	0	0	0	0	0
OTU_1526	OTU_1526;Bacteria;Proteobacteria;Gammaproteobacteria;Aeromonadales;Succinivibrionaceae;Succinivibrio;?	0	0	0	0	0	0	0	0	0	0	0	0	0	0	0	0	0	0	0	0	0	1.50936	0	0	0	0	0	1.23531	0	0	0	0	0	0	0	0
OTU_1533	OTU_1533;Bacteria;Firmicutes;Clostridia;Clostridiales;?;?;?	0	0	0	0	0	0	0	0	0	0	0	0	0	0	0	0	0	0	0	0	0	0	0	2.28694	0	0	0	0	0	0	0	0	0	0	0	0
OTU_1534	OTU_1534;Bacteria;Proteobacteria;Gammaproteobacteria;Enterobacteriales;Enterobacteriaceae;?;?	0	0	0	0	0	0	0	0	0	2.36543	0	0	0	0	0	0	0	0	0	0	0	0	0	0	0	0	0	0	0	0	0	0	0	0	0	0
OTU_1537	OTU_1537;Bacteria;Bacteroidetes;Bacteroidia;Bacteroidales;S24-7;?;?	0	0	0	0	0	0	0	0	0	0	0	0	0	0	0	0	0	0	0	0	0	0	0	0	0	0	0	0	0	0	0	0	0	1.61348	0	0
OTU_1538	OTU_1538;Bacteria;Firmicutes;Clostridia;Clostridiales;Ruminococcaceae;Ruminococcus;?	0	0	0	0	0	0	0	0	0	0	0	0	0	0	0	0	0	0	0	0	0	0	0	0	0	0	0	0	0	0	0	1.80295	0	0	0	0
OTU_1549	OTU_1549;Bacteria;Firmicutes;?;?;?;?;?	0	0	0	0	0	0	0	0	0	0	0	0	0	0	0	0	0	0	0	0	0	0	0	0	0	0	0	0	0	0	0	0	0	0	1.44607	0
OTU_1550	OTU_1550;Bacteria;Proteobacteria;Gammaproteobacteria;Pseudomonadales;Pseudomonadaceae;Pseudomonas;?	0	0	0.887072	0	0	0	0	0	0	0	0	0	0	0	0	0	0	1.57735	0	0	0	0	0	0	0	0	0	0	0	0	0	0	0	0	0	0
OTU_1556	OTU_1556;Bacteria;Firmicutes;Clostridia;Clostridiales;?;?;?	0	0	0	2.07608	0	0	0	0	0	0	0	0	0	0	0	0	0	0	0	0	0	0	0	0	0	0	0	0	0	0	0	0	0	0	0	0
OTU_1563	OTU_1563;Bacteria;Firmicutes;Clostridia;Clostridiales;Ruminococcaceae;Oscillospira;?	0	0	0	0	0	0	0	0	0	0	0	0	0	0	0	0	0	0	1.66181	0	0	0	0	0	0	0	0	0	0	0	0	0	0.813487	0	0	0
OTU_1566	OTU_1566;Bacteria;Firmicutes;Clostridia;Clostridiales;Dehalobacteriaceae;Dehalobacterium;?	0	0	0	0	0	0	0	0	2.41475	0	0	0	0	0	0	0	0	0	0	0	0	0	0	0	0	0	0	0	0	0	0	0	0	0	0	0
OTU_1569	OTU_1569;Bacteria;Firmicutes;Clostridia;Clostridiales;Ruminococcaceae;Oscillospira;?	0	0	0	0	0	0	0	0	0	0	0	0	0	0	0	0	0	0	0	0	0	0	0	0	0	0	0	0	0	0	0	0	1.71033	0	0	0
OTU_1570	OTU_1570;Bacteria;Firmicutes;Clostridia;Clostridiales;Lachnospiraceae;Dorea;?	0	0	0	0	1.00445	0	0	0	0	0	0	0	0	0	0	0	0	0	0	0	0	0	0	0	0	0	0	0	1.10604	0	0	0	0	0	0	0
OTU_1572	OTU_1572;Bacteria;Firmicutes;Clostridia;Clostridiales;[Mogibacteriaceae];?;?	0	0	0	0	0	0	0	0	0	0	0	0	0	0	0	0	0	0	0	0	0	0	0	0	0	0	0	0	0	0	0	0	0	0	0	1.6496
OTU_1575	OTU_1575;Bacteria;Firmicutes;Clostridia;?;?;?;?	0	1.3788	0	0	0	0	0	0	0	0	0	0	0	0	0	0	0	0	0	0	0	0	0	0	0	0	1.24434	0	0	0	0	0	0	0	0	0
OTU_1577	OTU_1577;Bacteria;Firmicutes;Clostridia;Clostridiales;Ruminococcaceae;?;?	0	0	0	0	0	0	0	0	0	0	0	0	0	0	0	0	0	0	0	0	0	0	1.04074	0	0	0	0	0	0	1.16685	0	0	0	0	0	0
OTU_1579	OTU_1579;Bacteria;Firmicutes;Bacilli;Lactobacillales;?;?;?	0	0	0	0	0	0	0	0	0	0	0	0	0	0	0	0	0	0	0	0	0	1.91466	0	0	0	0	0	0	0	0	0	0	0	0	0	0
OTU_1580	OTU_1580;Bacteria;Proteobacteria;Alphaproteobacteria;Rhizobiales;Methylobacteriaceae;?;?	0	0	0	0	0	0	0	0	0	0	0	0	0	0	0	0	0	1.99144	0	0	0	0	0	0	0	0	0	0	0	0	0	0	0	0	0	0
OTU_1582	OTU_1582;Bacteria;Bacteroidetes;Bacteroidia;Bacteroidales;Rikenellaceae;?;?	0	0	0	0	0	0	0	0	0	0	0	0	0	0	0	0	0	0	0	0	0	0	0	0	0	0	0	0	1.44827	0	0	0	0	0	0	0
OTU_1584	OTU_1584;Bacteria;Firmicutes;Clostridia;Clostridiales;Ruminococcaceae;Ruminococcus;?	0	0	0	0	0	0	0	0	0	0	0	0	0	0	0	0	0	0	0	0	0	0	0	2.28694	0	0	0	0	0	0	0	0	0	0	0	0
OTU_1587	OTU_1587;Bacteria;Firmicutes;Clostridia;Clostridiales;Ruminococcaceae;?;?	0	0	0	0	0	0	0	0	0	0	0	0	0	0	0	0	0	0	0	0	0	0	0	0	0	0	0	0	0	0	0	0	1.71033	0	0	0
OTU_1590	OTU_1590;Bacteria;Firmicutes;Clostridia;Clostridiales;Lachnospiraceae;?;?	0	0	0	0	0	0	0	0	0	0	0	0	0	0	0	0	0	0	1.05802	0	0	0	1.63903	0	0	0	0	0	0	0	0	0	0	0	0	0
OTU_1592	OTU_1592;Bacteria;Firmicutes;Clostridia;Clostridiales;Lachnospiraceae;[Ruminococcus];torques	0	0	0	0	0	0	0	0	0	0	0	0	0	0	0	0	0	0	0	0	2.14134	0	0	0	0	0	0	0	0	0	0	0	0	0	0	0
OTU_1594	OTU_1594;Bacteria;Firmicutes;Clostridia;Clostridiales;Ruminococcaceae;Oscillospira;?	0	0	0	0	0	0	0	0	0	0	0	0	0	0	0	0	0	0	0	0	0	0	0	0	0	0	0	0	0	0	0	0	0	1.61348	0	0
OTU_1596	OTU_1596;Bacteria;Bacteroidetes;Bacteroidia;Bacteroidales;S24-7;?;?	0	0	0	0	0	0	0	0	0	0	0	0	0	0	0	0	0	0	0	0	0	0	0	0	0	0	0	0	0	0	0	1.80295	0	0	0	0
OTU_1599	OTU_1599;Bacteria;Firmicutes;Clostridia;Clostridiales;?;?;?	0	0	0	0	0	0	0	0	0	0	0	0	0	0	0	0	0	0	0	0	0	0	0	0	1.90579	0	0	0	0	0	0	0	0	0	0	0
OTU_1600	OTU_1600;Bacteria;Firmicutes;Clostridia;Clostridiales;Ruminococcaceae;?;?	0	0	0	0	0	0	0	0	0	0	0	0	0	0	0	0	0	0	0	0	0	0	0	0	0	0	0	0	1.44827	0	0	0	0	0	0	0
OTU_1601	OTU_1601;Bacteria;Firmicutes;Clostridia;?;?;?;?	0	0	0	0	0	0	0	0	0	0	0	0	0	0	0	0	0	0	0	0	0	0	0	0	0	0	0	0	1.10604	0	0	0	0	0.754146	0	0
OTU_1604	OTU_1604;Bacteria;Firmicutes;Clostridia;Clostridiales;Lachnospiraceae;?;?	0	0	0	0	0	0	0	0	0	0	0	0	0	0	0	0	0	0	0	0	0	0	0	0	0	0	0	0	0	1.16685	0	0	0	0	0.655242	0
OTU_1608	OTU_1608;Bacteria;Firmicutes;Clostridia;Clostridiales;?;?;?	1.39441	0	0	0	0	0	0	0	0	0	0	0	0	0	0	1.58133	0	0	0	0	0	0	0	0	0	0	0	0	0	0	0	0	0	0	0	0
OTU_1609	OTU_1609;Bacteria;Firmicutes;Clostridia;Clostridiales;Ruminococcaceae;?;?	0	1.76586	0	0	0	0	0	0	0	0	0	0	0	0	0	0	0	0	0	0	0	0	0	0	0	0	0	0	0	0	0	0	0	0	0	0
OTU_1610	OTU_1610;Bacteria;Firmicutes;Clostridia;Clostridiales;Ruminococcaceae;?;?	0	0	0	0	0	0	0	0	0	0	0	0	0	0	0	0	0	0	0	0	0	0	0	0	0	0	0	0	0	0	1.55458	0	0	0	0	0
OTU_1612	OTU_1612;Bacteria;Firmicutes;Clostridia;Clostridiales;Ruminococcaceae;?;?	0	0	0	0	0	0	0	0	0	0	0	0	0	0	0	0	0	0	0	0	0	0.943674	0	0	0	0	0	0	0	0	0	0	0	0	1.10418	0
OTU_1620	OTU_1620;Bacteria;Firmicutes;Clostridia;Clostridiales;Ruminococcaceae;Oscillospira;?	0	0	0	0	0	0	0	0	0	0	0	0	0	0	0	0	0	0	0	0	0	0	0	0	0	0	0	0	0	0	1.55458	0	0	0	0	0
OTU_1624	OTU_1624;Bacteria;Firmicutes;Clostridia;Clostridiales;?;?;?	0	0	0	0	0	0	0	0	0	0	0	0	0	0	0	0	0	0	0	0	0	0	0	0	0	0	0	0	0	0	0	1.80295	0	0	0	0
OTU_1625	OTU_1625;Bacteria;Firmicutes;Clostridia;Clostridiales;?;?;?	0	0	0	0	0	0	0	0	0	0	0	0	0	0	0	0	0	0	0	0	0	0	0	0	0	0	0	0	0	0	0	0	0	1.61348	0	0
OTU_1630	OTU_1630;Bacteria;Firmicutes;Clostridia;?;?;?;?	0	0	0	0	0	0	0	0	0	0	0	0	0	0	1.5968	0	0	0	1.05802	0	1.09575	0	0	0	0	0	0	0	0	0	0	0	0	0	0	0
OTU_1631	OTU_1631;Bacteria;Firmicutes;Bacilli;Bacillales;Bacillaceae;?;?	0	0	0	0	0	0	0	0	0	0	0	0	0	0	0	0	0	0	0	0	0	0	0	0	0	0	0	0	0	0	0	0	1.71033	0	0	0
OTU_1633	OTU_1633;Bacteria;Firmicutes;Clostridia;Clostridiales;Ruminococcaceae;?;?	0	0	0	0	0	0	0	0	0	0	0	0	0	0	0	0	0	0	0	0	0	0	0	0	0	0	0	0	0	0	0	1.80295	0	0	0	0
OTU_1634	OTU_1634;Bacteria;Actinobacteria;Actinobacteria;Actinomycetales;Micrococcaceae;Rothia;aeria	0	0	0	0	0	0	0	0	0	0	0	0	0	0	0	0	0	0	0	2.21278	0	0	0	0	0	0	0	0	0	0	0	0	0	0	0	0
OTU_1635	OTU_1635;Bacteria;Bacteroidetes;Bacteroidia;Bacteroidales;S24-7;?;?	0	0	0	0	0	0	0	0	0	0	0	0	0	0	0	0	0	0	0	1.14528	0	0	0	0	0	0	0	0	1.10604	0	0	0	0	0	0	0
OTU_1643	OTU_1643;Bacteria;Bacteroidetes;Bacteroidia;Bacteroidales;?;?;?	0	0	0	0	0	0	0	0	0	0	2.07511	0	0	0	0	0	0	0	0	0	0	0	0	0	0	0	0	0	0	0	0	0	0	0	0	0
OTU_1647	OTU_1647;Bacteria;Bacteroidetes;Bacteroidia;Bacteroidales;[Barnesiellaceae];?;?	0	0	0	0	0	0	0	0	0	0	0	0	0	0	0	0	1.54036	0	0	0	0	0	0	0	0	0	0	0	0	0	0	0	0	0	0	0
OTU_1650	OTU_1650;Bacteria;Firmicutes;Clostridia;Clostridiales;?;?;?	0	0	0	0	0	0	0	0	0	0	0	0	0	0	0	0	0	0	0	0	0	0	0	0	0	0	1.90235	0	0	0	0	0	0	0	0	0
OTU_1651	OTU_1651;Bacteria;Firmicutes;Clostridia;Clostridiales;?;?;?	0	0	0	0	0	0	0	0	0	0	0	0	0	0	0	0	0	0	0	0	0	0	0	0	0	0	0	0	0	0	0	0	0	0	1.10418	0
OTU_1654	OTU_1654;Bacteria;Firmicutes;Clostridia;Clostridiales;?;?;?	0	0	0	0	0	0	0	0	0	0	0	0	0	0	0	0	0	0	0	0	0	0	0	0	0	0	0	0	0	0	0	0	0	0	1.10418	0
OTU_1655	OTU_1655;Bacteria;Firmicutes;Clostridia;Clostridiales;Ruminococcaceae;?;?	0	0	0	0	0	0	0	0	0	0	0	0	0	0	0	0	0	0	0	0	0	0	0	1.8427	0	0	0	0	0	0	0	0	0	0	0	0
OTU_1656	OTU_1656;Bacteria;Firmicutes;Erysipelotrichi;Erysipelotrichales;Erysipelotrichaceae;?;?	0	0	0	0	0	0	0	0	0	0	0	0	0	0	0	0	0	0	0	0	0	0	1.63903	0	0	0	0	0	0	0	0	0	0	0	0	0
OTU_1657	OTU_1657;Bacteria;Firmicutes;Clostridia;Clostridiales;?;?;?	0	0	0	0	0	0	0	0	0	0	0	0	0	0	0	0	0	0	0	0	0	0	0	0	0	1.58553	0	0	0	0	0	0	0	0	0	0
OTU_1662	OTU_1662;Bacteria;Firmicutes;Clostridia;Clostridiales;?;?;?	0	0	0	0	0	0	0	0	0	1.91407	0	0	0	0	0	0	0	0	0	0	0	0	0	0	0	0	0	0	0	0	0	0	0	0	0	0
OTU_1665	OTU_1665;Bacteria;Firmicutes;Clostridia;Clostridiales;Clostridiaceae;SMB53;?	0	0	0	0	0	0	0	0	0	0	0	0	0	0	0	0	0	0	0	0	0	0	0	1.8427	0	0	0	0	0	0	0	0	0	0	0	0
OTU_1667	OTU_1667;Bacteria;Bacteroidetes;Bacteroidia;Bacteroidales;S24-7;?;?	0	0	0	0	0	0	0	0	0	0	0	0	0	0	0	0	0	0	0	0	0	0	0	0	0	0	0	0	0	0	1.19639	0	0	0	0	0
OTU_1670	OTU_1670;Bacteria;Proteobacteria;Deltaproteobacteria;Desulfovibrionales;Desulfovibrionaceae;Bilophila;?	1.39441	0	0	0	0	0	0	0	0	0	0	0	0	0	0	0	0	0	0	0	0	0	0	0	0	0	0	0	0	0	0	0	0	0	0	0
OTU_1673	OTU_1673;Bacteria;Proteobacteria;Alphaproteobacteria;RF32;?;?;?	0	0	0	0	0	0	0	0	0	0	0	0	0	0	0	0	0	0	1.66181	0	0	0	0	0	0	0	0	0	0	0	0	0	0	0	0	0
OTU_1675	OTU_1675;Bacteria;Verrucomicrobia;Verrucomicrobiae;Verrucomicrobiales;Verrucomicrobiaceae;Akkermansia;muciniphila	0	0	0	0	0	0	0	0	0	0	0	0	0	0	0	0	0	0	0	0	1.71126	0	0	0	0	0	0	0	0	0	0	0	0	0	0	0
OTU_1676	OTU_1676;Bacteria;Firmicutes;Clostridia;Clostridiales;Lachnospiraceae;?;?	0	0	0	0	0	0	0	0	0	0	0	0	0	0	0	0	0	1.57735	0	0	0	0	0	0	0	0	0	0	0	0	0	0	0	0	0	0
OTU_1685	OTU_1685;Bacteria;Firmicutes;Clostridia;Clostridiales;Lachnospiraceae;?;?	0	0	1.43234	0	0	0	0	0	0	0	0	0	0	0	0	0	0	0	0	0	0	0	0	0	0	0	0	0	0	0	0	0	0	0	0	0
OTU_1689	OTU_1689;Bacteria;Bacteroidetes;Bacteroidia;Bacteroidales;Prevotellaceae;Prevotella;copri	0	0	0	0	0	0	0	0	0	0	0	0	0	0	0	0	0	0	0	0	1.71126	0	0	0	0	0	0	0	0	0	0	0	0	0	0	0
OTU_1695	OTU_1695;Bacteria;Firmicutes;Clostridia;Clostridiales;Lachnospiraceae;?;?	0	0	0	0	0	0	0	0	0	0	0	0	0	0	0	0	0	0	0	0	0	1.50936	0	0	0	0	0	0	0	0	0	0	0	0	0	0
OTU_1700	OTU_1700;Bacteria;Bacteroidetes;Bacteroidia;Bacteroidales;S24-7;?;?	0	0	0	0	0	0	0	0	0	0	0	0	0	0	0	0	0	0	0	0	0	0	0	0	1.50153	0	0	0	0	0	0	0	0	0	0	0
OTU_1701	OTU_1701;Bacteria;Bacteroidetes;Bacteroidia;Bacteroidales;S24-7;?;?	0	0	0	1.65279	0	0	0	0	0	0	0	0	0	0	0	0	0	0	0	0	0	0	0	0	0	0	0	0	0	0	0	0	0	0	0	0
OTU_1704	OTU_1704;Bacteria;Firmicutes;Clostridia;Clostridiales;Ruminococcaceae;?;?	0	0	0	0	0	0	0	0	0	0	0	0	0	0	0	0	0	0	0	0	0	0	0	0	0	1.58553	0	0	0	0	0	0	0	0	0	0
OTU_1706	OTU_1706;Bacteria;Firmicutes;Clostridia;Clostridiales;?;?;?	0	0	0	0	0	0	0	0	0	1.91407	0	0	0	0	0	0	0	0	0	0	0	0	0	0	0	0	0	0	0	0	0	0	0	0	0	0
OTU_1707	OTU_1707;Bacteria;Firmicutes;?;?;?;?;?	0	0	0	0	0	0	0	0	0	0	0	0	0	0	2.33612	0	0	0	0	0	0	0	0	0	0	0	0	0	0	0	0	0	0	0	0	0
OTU_1709	OTU_1709;Bacteria;Bacteroidetes;Bacteroidia;Bacteroidales;S24-7;?;?	0	0	0	0	0	0	0	0	0	0	0	0	0	0	0	0	0	0	0	0	0	0	0	0	0	0	0	0	0	0	1.19639	0	0	0	0	0
OTU_1710	OTU_1710;Bacteria;Firmicutes;Clostridia;Clostridiales;Lachnospiraceae;Coprococcus;?	0	0	0	0	0	0	0	0	0	0	0	0	0	0	0	0	0	0	0	0	0	0	0	0	0	0	0	0	0	0	0	0	0	0	0	1.27797
OTU_1711	OTU_1711;Bacteria;Firmicutes;Clostridia;Clostridiales;Christensenellaceae;?;?	0	0	0	0	0	0	0	0	0	0	0	0	0	0	0	0	0	0	0	0	0	0	0	0	0	0	0	0	0	1.16685	0	0	0	0	0	0
OTU_1714	OTU_1714;Bacteria;Firmicutes;Clostridia;Clostridiales;?;?;?	0	0	0	0	0	0	0	0	0	0	0	0	0	0	0	0	1.54036	0	0	0	0	0	0	0	0	0	0	0	0	0	0	0	0	0	0	0
OTU_1717	OTU_1717;Bacteria;Bacteroidetes;Bacteroidia;Bacteroidales;S24-7;?;?	0	0	0	0	0	0	0	0	0	0	0	0	0	0	0	0	0	0	0	0	0	0	0	0	0	0	0	0	0	0	1.19639	0	0	0	0	0
OTU_1719	OTU_1719;Bacteria;Actinobacteria;Coriobacteriia;Coriobacteriales;Coriobacteriaceae;Adlercreutzia;?	0	0	0	0	0	1.80614	0	0	0	0	0	0	0	0	0	0	0	0	0	0	0	0	0	0	0	0	0	0	0	0	0	0	0	0	0	0
OTU_1723	OTU_1723;Bacteria;Firmicutes;Clostridia;Clostridiales;Ruminococcaceae;Oscillospira;?	0	0	0	0	0	0	0	0	0	0	0	0	0	0	0	0	0	0	1.05802	0	0	0	1.04074	0	0	0	0	0	0	0	0	0	0	0	0	0
OTU_1729	OTU_1729;Bacteria;Firmicutes;Clostridia;Clostridiales;?;?;?	0	0	0	0	0	0	0	0	0	0	2.07511	0	0	0	0	0	0	0	0	0	0	0	0	0	0	0	0	0	0	0	0	0	0	0	0	0
OTU_1731	OTU_1731;Bacteria;Firmicutes;Clostridia;Clostridiales;Ruminococcaceae;?;?	0	0	0	0	0	0	0	0	0	0	0	0	0	0	0	0	0	0	0	0	0	0	0	0	0	0	0	0	0	1.16685	0	0	0	0	0	0
OTU_1732	OTU_1732;Bacteria;Firmicutes;Clostridia;Clostridiales;Ruminococcaceae;?;?	0	0	0	0	0	0	0	0	0	1.91407	0	0	0	0	0	0	0	0	0	0	0	0	0	0	0	0	0	0	0	0	0	0	0	0	0	0
OTU_1733	OTU_1733;Bacteria;Firmicutes;Clostridia;Clostridiales;Lachnospiraceae;?;?	0	0	0	0	0	0	0	0	0	0	0	0	0	0	0	2.31757	0	0	0	0	0	0	0	0	0	0	0	0	0	0	0	0	0	0	0	0
OTU_1734	OTU_1734;Bacteria;Bacteroidetes;Bacteroidia;Bacteroidales;S24-7;?;?	0	0	0	0	0	0	0	0	0	0	0	0	0	0	0	0	1.54036	0	0	0	0	0	0	0	0	0	0	0	0	0	0	0	0	0	0	0
OTU_1747	OTU_1747;Bacteria;Firmicutes;Clostridia;Clostridiales;Ruminococcaceae;Ruminococcus;?	0	0	0	0	0	0	0	0	0	0	0	0	0	0	0	0	0	0	0	0	0	0	0	0	0	0	0	0	0	0	0	0	0	0	0	1.27797
OTU_1750	OTU_1750;Bacteria;Firmicutes;Clostridia;Clostridiales;Ruminococcaceae;Oscillospira;?	0	0	0	0	0	0	0	0	0	0	0	0	0	0	0	0	0	0	0	0	0	0	0	0	0	0	0	0	0	0	1.19639	0	0	0	0	0
OTU_1753	OTU_1753;Bacteria;Bacteroidetes;Bacteroidia;Bacteroidales;Bacteroidaceae;Bacteroides;uniformis	0	0	0	0	0	0	0	0	0	0	0	0	0	0	0	0	0	0	0	0	0	0	0	0	0	0	0	0	0	0	1.19639	0	0	0	0	0
OTU_1757	OTU_1757;Bacteria;Firmicutes;Clostridia;Clostridiales;Ruminococcaceae;?;?	0	0	0	0	0	0	0	0	0	0	0	0	0	0	0	0	0	0	0	0	1.71126	0	0	0	0	0	0	0	0	0	0	0	0	0	0	0
OTU_1758	OTU_1758;Bacteria;Firmicutes;Clostridia;Clostridiales;?;?;?	0	0	0	0	0	0	0	0	0	0	0	0	0	0	0	0	0	0	0	0	1.71126	0	0	0	0	0	0	0	0	0	0	0	0	0	0	0
OTU_1759	OTU_1759;Bacteria;Firmicutes;Clostridia;Clostridiales;Lachnospiraceae;?;?	1.39441	0	0	0	0	0	0	0	0	0	0	0	0	0	0	0	0	0	0	0	0	0	0	0	0	0	0	0	0	0	0	0	0	0	0	0
OTU_1761	OTU_1761;Bacteria;Firmicutes;Clostridia;Clostridiales;Ruminococcaceae;Oscillospira;?	0	0	0	0	0	0	0	0	0	0	0	0	0	0	0	0	1.54036	0	0	0	0	0	0	0	0	0	0	0	0	0	0	0	0	0	0	0
OTU_1763	OTU_1763;Bacteria;Firmicutes;Bacilli;Bacillales;Bacillaceae;?;?	0	0	0	0	0	0	0	0	0	0	0	0	0	0	0	0	0	0	0	0	0	0	0	0	0	0	0	0	0	0	0	0	1.33051	0	0	0
OTU_1765	OTU_1765;Bacteria;Firmicutes;Clostridia;Clostridiales;Ruminococcaceae;?;?	0	0	0	0	0	0	0	0	0	0	0	0	0	0	0	0	0	0	0	0	0	0	0	0	0	0	0	0	0	0	0	0	0	1.24687	0	0
OTU_1767	OTU_1767;Bacteria;Firmicutes;Clostridia;Clostridiales;?;?;?	0	0	0	0	0	0	0	0	0	0	0	0	0	0	0	0	0	0	0	0	0	0	0	0	0	0	0	0	0	0	0	0	1.33051	0	0	0
OTU_1768	OTU_1768;Bacteria;Firmicutes;Clostridia;Clostridiales;Lachnospiraceae;[Ruminococcus];gnavus	0	0	0	0	0	0	0	0	0	0	0	0	0	0	0	0	0	0	1.66181	0	0	0	0	0	0	0	0	0	0	0	0	0	0	0	0	0
OTU_1769	OTU_1769;Bacteria;Firmicutes;Clostridia;?;?;?;?	0	0	0	0	0	0	0	0	0	0	0	0	0	0	0	0	1.54036	0	0	0	0	0	0	0	0	0	0	0	0	0	0	0	0	0	0	0
OTU_1771	OTU_1771;Bacteria;Firmicutes;Clostridia;Clostridiales;?;?;?	0	0	0	0	0	0	0	0	0	0	0	0	0	0	0	0	0	0	0	0	1.71126	0	0	0	0	0	0	0	0	0	0	0	0	0	0	0
OTU_1772	OTU_1772;Bacteria;Firmicutes;Clostridia;Clostridiales;Peptostreptococcaceae;?;?	0	0	0	0	0	0	0	0	0	0	0	0	0	0	0	0	0	0	0	0	0	0	0	0	0	0	0	0	0	0	1.19639	0	0	0	0	0
OTU_1774	OTU_1774;Bacteria;Bacteroidetes;Bacteroidia;Bacteroidales;Rikenellaceae;?;?	0	0	0	0	0	0	0	0	0	0	0	0	0	0	0	0	0	0	0	0	0	1.50936	0	0	0	0	0	0	0	0	0	0	0	0	0	0
OTU_1777	OTU_1777;Bacteria;Firmicutes;Clostridia;Clostridiales;Ruminococcaceae;Oscillospira;?	0	0	0	0	0	0	0	0	0	0	0	0	0	0	0	0	0	0	0	0	0	0	0	0	0	0	0	0	0	0	1.19639	0	0	0	0	0
OTU_1779	OTU_1779;Bacteria;Firmicutes;Clostridia;Clostridiales;Ruminococcaceae;?;?	0	0	0	0	0	0	0	0	0	0	0	0	0	0	0	0	0	0	0	0	0	0	0	0	1.50153	0	0	0	0	0	0	0	0	0	0	0
OTU_1780	OTU_1780;Bacteria;Firmicutes;Clostridia;Clostridiales;?;?;?	0	0	0	0	0	0	0	0	0	0	0	0	0	0	0	0	0	0	0	0	0	0	0	0	0	0	0	0	0	0	0	0	0	1.24687	0	0
OTU_1781	OTU_1781;Bacteria;Bacteroidetes;Bacteroidia;Bacteroidales;S24-7;?;?	0	0	0	0	0	0	0	0	0	0	0	0	0	0	0	0	0	0	0	0	0	0	0	0	0	0	0	0	0	0	1.19639	0	0	0	0	0
OTU_1784	OTU_1784;Bacteria;Firmicutes;Clostridia;Clostridiales;Ruminococcaceae;?;?	0	0	0	0	0	0	0	0	0	0	0	0	0	0	0	0	0	0	0	0	0	0	0	0	0	0	1.90235	0	0	0	0	0	0	0	0	0
OTU_1788	OTU_1788;Bacteria;Firmicutes;Clostridia;Clostridiales;Ruminococcaceae;?;?	0	0	0	0	0	0	0	0	0	0	0	0	0	0	0	0	0	1.57735	0	0	0	0	0	0	0	0	0	0	0	0	0	0	0	0	0	0
OTU_1789	OTU_1789;Bacteria;Bacteroidetes;Bacteroidia;Bacteroidales;?;?;?	0	0	0	0	0	0	0	0	0	0	2.07511	0	0	0	0	0	0	0	0	0	0	0	0	0	0	0	0	0	0	0	0	0	0	0	0	0
OTU_1790	OTU_1790;Bacteria;Firmicutes;Clostridia;?;?;?;?	0	0	0	0	0	0	0	0	0	0	0	0	0	0	0	0	0	0	0	0	0	0	0	0	0	0	0	0	0	1.16685	0	0	0	0	0	0
OTU_1791	OTU_1791;Bacteria;Firmicutes;Clostridia;Clostridiales;Ruminococcaceae;Ruminococcus;?	0	0	0	0	0	0	0	0	0	0	0	0	0	0	0	0	0	0	0	0	0	0	0	0	0	0	0	0	0	0	0	0	0	0	0	1.27797
OTU_1793	OTU_1793;Bacteria;Firmicutes;Clostridia;Clostridiales;Lachnospiraceae;?;?	0	1.3788	0	0	0	0	0	0	0	0	0	0	0	0	0	0	0	0	0	0	0	0	0	0	0	0	0	0	0	0	0	0	0	0	0	0
OTU_1800	OTU_1800;Bacteria;Firmicutes;Clostridia;Clostridiales;Dehalobacteriaceae;Dehalobacterium;?	0	0	0	0	0	0	0	0	0	0	0	0	0	0	0	0	0	0	0	0	0	0	0	0	0	0	0	0	0	1.16685	0	0	0	0	0	0
OTU_1806	OTU_1806;Bacteria;Actinobacteria;Actinobacteria;Actinomycetales;Micrococcaceae;Rothia;?	0	0	0	0	0	0	0	1.78244	0	0	0	0	0	0	0	0	0	0	0	0	0	0	0	0	0	0	0	0	0	0	0	0	0	0	0	0
OTU_1816	OTU_1816;Bacteria;Firmicutes;Clostridia;Clostridiales;Ruminococcaceae;Oscillospira;?	0	0	1.43234	0	0	0	0	0	0	0	0	0	0	0	0	0	0	0	0	0	0	0	0	0	0	0	0	0	0	0	0	0	0	0	0	0
OTU_1819	OTU_1819;Bacteria;Bacteroidetes;Bacteroidia;Bacteroidales;S24-7;?;?	0	0	0	0	0	0	0	0	0	0	0	0	0	0	0	0	0	0	0	0	0	0	0	0	0	0	0	0	0	0	1.19639	0	0	0	0	0
OTU_1820	OTU_1820;Bacteria;Firmicutes;Bacilli;Lactobacillales;Lactobacillaceae;Lactobacillus;?	0	0	0	1.65279	0	0	0	0	0	0	0	0	0	0	0	0	0	0	0	0	0	0	0	0	0	0	0	0	0	0	0	0	0	0	0	0
OTU_1822	OTU_1822;Bacteria;Bacteroidetes;Bacteroidia;Bacteroidales;S24-7;?;?	0	0	0	0	0	0	0	0	0	0	0	0	0	0	0	0	0	0	0	0	0	0	0	0	0	0	0	0	0	0	0	0	0	0	1.10418	0
OTU_1829	OTU_1829;Bacteria;Firmicutes;Clostridia;Clostridiales;Ruminococcaceae;?;?	0	0	0	0	0	0	0	0	0	0	0	0	0	0	0	2.31757	0	0	0	0	0	0	0	0	0	0	0	0	0	0	0	0	0	0	0	0
OTU_1834	OTU_1834;Bacteria;Firmicutes;Erysipelotrichi;Erysipelotrichales;Erysipelotrichaceae;?;?	0	0	0	0	0	0	0	0	0	0	0	0	0	0	0	0	0	0	0	0	0	0	0	0	0	0	0	0	0	0	0	0	1.33051	0	0	0
OTU_1836	OTU_1836;Bacteria;Firmicutes;Clostridia;Clostridiales;Ruminococcaceae;?;?	0	0	0	0	0	0	0	0	0	0	0	0	0	0	0	0	0	0	0	0	0	0	0	0	0	0	0	0	0	0	0	0	0	0	0	1.27797
OTU_1838	OTU_1838;Bacteria;Firmicutes;Clostridia;Clostridiales;Ruminococcaceae;?;?	0	0	0	0	0	0	0	0	0	0	0	0	0	0	0	0	0	0	0	0	0	0	0	0	0	0	0	0	1.10604	0	0	0	0	0	0	0
OTU_1839	OTU_1839;Bacteria;Firmicutes;Clostridia;Clostridiales;Lachnospiraceae;Blautia;?	0	0	0	0	0	0	0	0	0	0	0	0	0	0	0	0	0	0	0	0	0	0	0	0	0	0	0	0	0	0	0	0	0	0	1.10418	0
OTU_1850	OTU_1850;Bacteria;Firmicutes;Clostridia;Clostridiales;Ruminococcaceae;?;?	0	0	0	0	0	0	0	0	0	0	0	0	0	0	0	0	0	0	0	0	0	0	0	0	0	0	0	0	1.10604	0	0	0	0	0	0	0
OTU_1851	OTU_1851;Bacteria;Bacteroidetes;Bacteroidia;Bacteroidales;Bacteroidaceae;Bacteroides;uniformis	0	0	0	0	0	0	0	0	0	0	0	0	0	0	0	0	0	0	0	0	0	0	0	0	0	0	0	0	0	0	0	0	0	1.24687	0	0
OTU_1853	OTU_1853;Bacteria;Firmicutes;Clostridia;Clostridiales;Lachnospiraceae;Blautia;?	1.39441	0	0	0	0	0	0	0	0	0	0	0	0	0	0	0	0	0	0	0	0	0	0	0	0	0	0	0	0	0	0	0	0	0	0	0
OTU_1855	OTU_1855;Bacteria;Bacteroidetes;Bacteroidia;Bacteroidales;S24-7;?;?	0	0	0	0	0	0	0	0	0	0	0	0	0	0	0	0	0	0	0	0	0	0	0	0	0	0	0	0	0	1.16685	0	0	0	0	0	0
OTU_1857	OTU_1857;Bacteria;Firmicutes;Clostridia;Clostridiales;?;?;?	0	0	0	0	0	0	0	0	0	0	0	0	0	0	0	0	0	0	0	0	0	0	0	0	0	0	0	0	0	0	1.19639	0	0	0	0	0
OTU_1860	OTU_1860;Bacteria;Firmicutes;Clostridia;Clostridiales;Lachnospiraceae;?;?	0	0	0	0	0	0	0	0	0	0	0	0	0	0	0	0	0	0	1.66181	0	0	0	0	0	0	0	0	0	0	0	0	0	0	0	0	0
OTU_1861	OTU_1861;Bacteria;Bacteroidetes;Bacteroidia;Bacteroidales;Rikenellaceae;?;?	0	0	0	0	0	1.80614	0	0	0	0	0	0	0	0	0	0	0	0	0	0	0	0	0	0	0	0	0	0	0	0	0	0	0	0	0	0
OTU_1862	OTU_1862;Bacteria;Firmicutes;Clostridia;Clostridiales;Ruminococcaceae;Ruminococcus;?	0	0	0	0	0	0	0	0	0	0	0	0	0	0	0	0	0	0	0	0	0	0	0	0	0	0	0	0	1.10604	0	0	0	0	0	0	0
OTU_1888	OTU_1888;Bacteria;Firmicutes;Clostridia;Clostridiales;Lachnospiraceae;?;?	0	0	0	0	0	0	0	0	0	0	0	0	0	0	2.33612	0	0	0	0	0	0	0	0	0	0	0	0	0	0	0	0	0	0	0	0	0
OTU_1894	OTU_1894;Bacteria;Firmicutes;Clostridia;Clostridiales;?;?;?	0	0	0	0	0	0	0	1.78244	0	0	0	0	0	0	0	0	0	0	0	0	0	0	0	0	0	0	0	0	0	0	0	0	0	0	0	0
OTU_1896	OTU_1896;Bacteria;Firmicutes;Clostridia;Clostridiales;?;?;?	1.39441	0	0	0	0	0	0	0	0	0	0	0	0	0	0	0	0	0	0	0	0	0	0	0	0	0	0	0	0	0	0	0	0	0	0	0
OTU_1899	OTU_1899;Bacteria;Firmicutes;Clostridia;Clostridiales;Ruminococcaceae;Ruminococcus;?	0	0	0	0	0	0	0	0	0	0	0	0	0	0	0	0	0	0	0	0	0	0	0	0	0	0	0	0	0	0	0	0	0	0	0	1.27797
OTU_1900	OTU_1900;Bacteria;Firmicutes;Clostridia;Clostridiales;?;?;?	0	0	0	0	0	0	0	0	0	0	0	0	0	0	0	0	0	0	0	0	0	0	1.63903	0	0	0	0	0	0	0	0	0	0	0	0	0
OTU_1906	OTU_1906;Bacteria;Firmicutes;Clostridia;Clostridiales;Ruminococcaceae;Ruminococcus;?	0	0	0	0	0	0	0	0	0	0	0	0	0	0	0	0	0	0	1.05802	0	0	0	0	0	0	0	0	0	0	0	0.718811	0	0	0	0	0
OTU_1908	OTU_1908;Bacteria;Firmicutes;Clostridia;Clostridiales;?;?;?	0	0	1.43234	0	0	0	0	0	0	0	0	0	0	0	0	0	0	0	0	0	0	0	0	0	0	0	0	0	0	0	0	0	0	0	0	0
OTU_1913	OTU_1913;Bacteria;Bacteroidetes;Bacteroidia;Bacteroidales;?;?;?	0	0	0	0	0	0	0	0	0	0	0	0	0	0	0	0	0	0	0	0	0	0	0	0	0	0	0	0	1.10604	0	0	0	0	0	0	0
OTU_1914	OTU_1914;Bacteria;Bacteroidetes;Bacteroidia;Bacteroidales;Bacteroidaceae;Bacteroides;?	0	0	0	0	0	0	0	0	0	0	0	0	0	0	0	0	0	0	0	0	0	0	0	0	0	0	0	0	0	0	0	0	0	0	0	1.27797
OTU_1916	OTU_1916;Bacteria;Firmicutes;Clostridia;Clostridiales;Ruminococcaceae;Oscillospira;?	0	0	0	0	0	0	0	0	0	0	0	0	0	0	0	0	0	0	0	1.77559	0	0	0	0	0	0	0	0	0	0	0	0	0	0	0	0
OTU_1917	OTU_1917;Bacteria;Firmicutes;Clostridia;Clostridiales;?;?;?	0	0	0	0	0	0	0	0	0	0	0	0	0	0	0	0	1.54036	0	0	0	0	0	0	0	0	0	0	0	0	0	0	0	0	0	0	0

## Sheet: Phylum_C09C11_Biofood_norm
Tax	HFS_1_MB19470	HFS_2_MB19471	HFS_3_MB19472	HFS_4_MB19473	HFS_5_MB19474	HFS_7_MB19475	HFS_8_MB19476	KEF_1_MB19477	KEF_6_MB19478	KEF_8_MB19479	KEF_11_MB19480	KpP_1_MB19481	KpP_5_MB19482	KpP_7_MB19483	KpP_8_MB19484	KpP_9_MB19485	KpP_10_MB19486	P_3_MB19487	P_4_MB19488	P_5_MB19489	P_7_MB19490	P_8_MB19491	P_9_MB19492	P_11_MB19493	LACT_3_MB19494	LACT_5_MB19495	LACT_6_MB19496	LACT_8_MB19497	HFS_9_MB20336	HFS_10_MB20337	CECT_2_MB20338	CECT_4_MB20339	CECT_5_MB20340	CECT_8_MB20341	CECT_9_MB20342	CECT_10_MB20343
Actinobacteria	9.28818	10.2646	11.3305	9.31556	9.60795	8.93696	8.75527	8.91491	10.5696	11.298	8.35333	9.58274	9.14771	9.51619	9.30589	12.3502	8.4486	11.4769	10.1488	11.6554	10.9708	10.3104	13.1561	10.4	6.92855	7.90714	6.97194	7.69221	9.77313	11.4276	6.98028	7.51402	8.30791	8.67469	8.33227	9.15146
Bacteroidetes	13.258	14.8423	14.6263	13.714	15.2119	13.4777	14.2478	12.8463	15.4582	14.4795	15.2886	13.8876	15.876	13.9836	13.0995	13.6971	13.8951	14.3691	13.2346	14.409	13.9653	14.8775	14.6553	13.1474	14.3324	14.5938	13.9311	15.0463	14.596	13.7772	14.381	14.3606	14.2448	14.1937	14.5428	14.2209
Cyanobacteria	5.49197	5.96848	4.23674	4.26588	1.00403	1.16847	4.27264	4.91965	3.94824	5.45673	4.34152	5.90067	5.50126	6.98206	3.18612	3.45453	2.9413	0.99452	8.93718	5.59332	2.74114	7.96238	6.1026	5.75556	2.88886	0	8.03555	7.40005	7.40776	4.76399	2.08011	6.00194	4.6138	8.12735	6.84306	0
Deferribacteres	11.468	10.7621	8.74929	11.4894	7.53157	4.20697	6.59434	7.47426	11.6639	3.41834	6.60536	7.5386	9.39884	11.8965	8.55343	8.56827	4.3283	15.1111	11.833	15.4479	11.8811	5.53137	12.5404	6.53643	9.60374	9.26234	4.12285	10.2949	6.50584	10.9024	4.77994	9.74842	9.62641	7.40788	7.95844	9.61299
Firmicutes	17.4908	17.1568	17.2263	17.2002	15.4541	16.125	15.8822	15.6498	16.8376	17.1847	15.8651	17.4284	16.0841	17.3099	17.3241	17.3998	16.7429	16.7924	17.4136	16.8434	16.4927	17.0978	16.9365	17.4367	16.5013	16.8558	15.6295	16.5406	16.2798	17.4506	17.1039	17.4808	17.2103	16.8881	17.3438	17.1932
Proteobacteria	11.2264	11.2313	12.5814	9.79129	7.11651	12.3599	11.5464	8.83627	13.142	14.5599	10.6108	11.1814	13.5492	12.9059	12.1759	12.9417	10.8906	12.7667	12.4491	11.2281	15.5743	11.8048	14.7258	12.0189	10.4231	11.0344	10.4607	12.4358	9.11996	9.5411	7.52649	10.2561	9.34314	11.7088	10.6162	11.3546
SR1	0	0	0	2.07672	0	0	0	0	0	0	0	0	0	0	0	0	0	0	0	0	0	0	0	0	0	0	0	0	0	0	0	0	0	0	0	0
Tenericutes	9.23649	12.3947	9.50249	12.741	2.81426	5.63406	9.72263	10.3827	8.57786	7.70506	11.4205	12.0021	7.20324	8.87893	13.3324	10.9217	9.26373	9.57775	8.98727	8.99822	11.4357	12.5531	9.35745	10.2036	12.2563	9.80277	6.95613	13.2241	6.19016	9.46428	11.8478	8.04059	9.31253	10.4026	10.3595	3.93029
TM6	1.78436	0	0	0	0	0	0	0	0	0	0	0	0	0	0	0	0	0	1.66199	0	0	0	0	0	0	0	0	0	0	0	0	0	0	0	0	0
TM7	0	0	0.887644	0	0	4.76566	0.845496	0	0	0	2.07459	0	0	4.72839	0	0	0	0	3.27175	0	0	3.59473	0	0	0.937546	0	2.97132	0	3.77347	1.80425	3.23172	5.78018	3.7948	3.09574	2.62598	2.88954
Verrucomicrobia	13.6096	14.7036	14.5796	15.2022	16.9774	16.9231	16.9743	17.2112	15.1616	13.7972	16.7277	13.7746	16.0943	14.3904	14.5607	13.472	16.3784	14.9815	14.0855	14.4744	15.5338	14.9415	14.2028	14.2649	16.496	16.0062	17.143	16.0337	16.7057	13.74	15.5131	12.6435	15.2699	16.0404	14.2289	15.2894

## Sheet: Class_C09C11_Biofood_norm
Tax	HFS_1_MB19470	HFS_2_MB19471	HFS_3_MB19472	HFS_4_MB19473	HFS_5_MB19474	HFS_7_MB19475	HFS_8_MB19476	KEF_1_MB19477	KEF_6_MB19478	KEF_8_MB19479	KEF_11_MB19480	KpP_1_MB19481	KpP_5_MB19482	KpP_7_MB19483	KpP_8_MB19484	KpP_9_MB19485	KpP_10_MB19486	P_3_MB19487	P_4_MB19488	P_5_MB19489	P_7_MB19490	P_8_MB19491	P_9_MB19492	P_11_MB19493	LACT_3_MB19494	LACT_5_MB19495	LACT_6_MB19496	LACT_8_MB19497	HFS_9_MB20336	HFS_10_MB20337	CECT_2_MB20338	CECT_4_MB20339	CECT_5_MB20340	CECT_8_MB20341	CECT_9_MB20342	CECT_10_MB20343
4C0d-2	5.49197	5.96848	4.23674	4.26588	1.00403	1.16847	4.27264	4.91965	3.94824	5.45673	4.34152	5.90067	5.50126	6.98206	3.18612	3.45453	2.9413	0.99452	8.93718	5.59332	2.74114	7.96238	6.1026	5.75556	2.88886	0	8.03555	7.40005	7.40776	4.76399	2.08011	6.00194	4.6138	8.12735	6.84306	0
Actinobacteria	8.41281	9.64606	11.1007	8.99299	9.31182	8.79424	8.22801	8.76527	10.0875	10.9887	7.29272	7.93469	8.39273	8.20139	8.84789	12.1804	8.05708	11.216	9.44032	11.3965	10.2554	9.87109	12.9265	9.43922	6.30008	7.45146	6.51289	5.63651	9.64715	11.3656	6.3638	7.24074	7.98453	8.40654	7.91099	8.94178
Alphaproteobacteria	3.81128	8.4275	7.06203	2.89471	2.59167	5.26423	4.63845	4.86032	4.19562	9.12653	5.36293	2.91205	4.70243	6.98206	8.01249	7.90752	6.2555	4.68988	6.22099	3.714	6.43111	7.12432	6.16775	7.55864	6.96071	5.70068	3.40321	3.99047	3.89018	4.05119	6.24601	7.58435	5.67241	3.09574	6.11684	7.68243
Bacilli	12.9926	10.6659	11.4672	14.2818	11.0116	12.8337	13.3657	9.0338	12.8686	13.567	11.3548	15.0067	13.6025	15.2403	11.9684	14.4361	12.8856	13.7177	13.2573	13.7063	12.8157	12.5304	14.2284	13.2973	11.5372	14.4536	9.37959	13.9207	12.4932	12.2112	12.1122	11.1676	11.1556	10.135	10.2764	10.0432
Bacteroidia	13.258	14.8423	14.6263	13.714	15.2119	13.4777	14.2478	12.8463	15.4582	14.4746	15.2886	13.8872	15.876	13.9836	13.0992	13.6967	13.8948	14.3691	13.2346	14.4089	13.9653	14.877	14.6553	13.1474	14.3324	14.5938	13.9308	15.0463	14.5959	13.7772	14.381	14.3606	14.2447	14.1937	14.5428	14.2209
Betaproteobacteria	0	1.37876	0	1.0516	0	0	0	0	0	0	0	0	0	1.64419	0	3.16513	0	0	0	4.06692	0	1.5094	0	2.28685	0	1.00012	2.97132	0	3.77347	3.75086	2.28513	3.55962	2.25938	2.84326	1.44591	3.02195
Clostridia	17.4237	17.1386	17.194	16.995	15.3688	15.948	15.5936	15.6313	16.7285	17.0536	15.7951	17.0645	15.7822	16.9051	17.2812	17.1608	16.6339	16.6056	17.2477	16.6376	16.3596	17.0129	16.5928	17.2143	16.453	16.5515	15.6088	16.2732	16.1345	17.4063	17.0528	17.4609	17.185	16.8701	17.3306	17.1762
Coriobacteriia	8.15681	8.74792	8.57049	7.00748	7.1879	5.55968	7.05834	5.60164	8.75703	8.9276	7.41995	9.03108	7.85861	8.77775	7.43595	9.18197	6.39292	8.88386	8.78621	9.05193	9.61777	8.3853	10.392	9.36193	5.46001	6.04464	5.13803	7.30443	6.21275	6.86913	5.48884	5.02428	6.01426	6.13572	6.3684	6.284
Deferribacteres	11.468	10.7621	8.74929	11.4894	7.53157	4.20697	6.59434	7.47426	11.6639	3.41834	6.60536	7.5386	9.39884	11.8965	8.55343	8.56827	4.3283	15.1111	11.833	15.4479	11.8811	5.53137	12.5404	6.53643	9.60374	9.26234	4.12285	10.2949	6.50584	10.9024	4.77994	9.74842	9.62641	7.40788	7.95844	9.61299
Deltaproteobacteria	10.8251	1.37876	6.19501	8.51051	0	1.16847	0	2.2198	9.80043	1.91414	0	0	1.54885	9.07931	11.8851	8.68462	6.93325	9.9706	10.6356	10.6417	9.35008	1.91471	10.1662	8.60838	7.77369	3.32215	5.13803	5.23111	6.04665	6.04011	3.58214	9.65644	3.87147	1.90499	4.14312	4.43667
Erysipelotrichi	7.85557	7.65145	9.14339	5.55861	9.00803	9.89636	8.63318	7.06521	10.0428	9.6683	7.73476	12.6442	9.41521	10.023	9.63473	12.0489	8.69109	8.30194	13.1624	11.1487	9.84704	11.0356	12.8515	13.8994	6.38153	6.87061	5.86981	9.27252	10.8612	9.38582	8.88961	7.67504	8.4428	8.56917	8.13696	9.4609
Gammaproteobacteria	9.15428	11.0067	12.5324	9.0081	7.06327	12.3492	11.5348	8.73255	12.9893	14.526	10.5733	11.1773	13.546	12.7747	9.20057	12.8158	10.7328	12.5366	11.9398	9.597	15.5523	11.7459	14.6594	11.8014	10.0107	10.9918	10.4079	12.4223	8.86043	9.34908	6.56413	7.74927	9.18501	11.7016	10.5341	11.2206
Mollicutes	9.21884	12.3906	9.48719	12.7389	2.81426	5.59735	9.69793	10.3827	8.57786	7.62637	11.3923	12.0006	7.18426	8.82585	13.3307	10.9217	9.26373	9.53593	8.75041	8.99822	11.4357	12.5531	9.35745	10.1683	12.2563	9.80115	6.46899	13.1301	6.19016	9.46173	11.821	7.41926	9.29175	10.3864	10.3289	3.93029
RF3	3.059	4.0183	3.11293	3.41351	0	1.16847	3.93959	0	0	3.59402	5.75494	2.41988	1.54885	4.17039	3.71725	0	0	4.51306	6.28246	0	0	0	0	4.88032	0	1.00012	5.19303	9.24058	0	1.16751	6.10426	6.54131	3.33497	4.0088	4.83741	0
SJA-4	1.78436	0	0	0	0	0	0	0	0	0	0	0	0	0	0	0	0	0	1.66199	0	0	0	0	0	0	0	0	0	0	0	0	0	0	0	0	0
Sphingobacteriia	0	0	0	0	0	0	0	0	0	6.32036	0	2.41988	0	0	1.59713	2.31762	1.94983	0	0	1.14553	0	3.48002	0	0	0	0	1.90189	0	0	0	0	0	0	0	0	0
TM7-3	0	0	0.887644	0	0	4.76566	0.845496	0	0	0	2.07459	0	0	4.72839	0	0	0	0	3.27175	0	0	3.59473	0	0	0.937546	0	2.97132	0	3.77347	1.80425	3.23172	5.78018	3.7948	3.09574	2.62598	2.88954
Verrucomicrobiae	13.6096	14.7036	14.5796	15.2022	16.9774	16.9231	16.9743	17.2112	15.1616	13.7972	16.7277	13.7746	16.0943	14.3904	14.5607	13.472	16.3784	14.9815	14.0855	14.4744	15.5338	14.9415	14.2028	14.2649	16.496	16.0062	17.143	16.0337	16.7057	13.74	15.5131	12.6435	15.2699	16.0404	14.2289	15.2894

## Sheet: Order_C09C11_Biofood_norm
Tax	HFS_1_MB19470	HFS_2_MB19471	HFS_3_MB19472	HFS_4_MB19473	HFS_5_MB19474	HFS_7_MB19475	HFS_8_MB19476	KEF_1_MB19477	KEF_6_MB19478	KEF_8_MB19479	KEF_11_MB19480	KpP_1_MB19481	KpP_5_MB19482	KpP_7_MB19483	KpP_8_MB19484	KpP_9_MB19485	KpP_10_MB19486	P_3_MB19487	P_4_MB19488	P_5_MB19489	P_7_MB19490	P_8_MB19491	P_9_MB19492	P_11_MB19493	LACT_3_MB19494	LACT_5_MB19495	LACT_6_MB19496	LACT_8_MB19497	HFS_9_MB20336	HFS_10_MB20337	CECT_2_MB20338	CECT_4_MB20339	CECT_5_MB20340	CECT_8_MB20341	CECT_9_MB20342	CECT_10_MB20343
Actinomycetales	8.41281	9.64606	11.1007	8.99299	9.31182	8.79424	8.22801	8.76527	10.0875	10.9887	7.29272	7.93469	8.39273	8.20139	8.84789	12.1804	8.05708	11.216	9.44032	11.3965	10.2554	9.87109	12.9265	9.43922	6.30008	7.45146	6.51289	5.63651	9.64715	11.3656	6.3638	7.24074	7.98453	8.40654	7.91099	8.94178
Aeromonadales	0	0	0	0	0	0	0	0	0	0	0	0	0	0	0	0	0	0	0	0	0	1.5094	0	0	0	0	0	1.23515	0	0	0	0	0	0	0	0
Anaeroplasmatales	8.86763	12.358	3.68954	12.715	2.59167	5.59735	9.58271	8.58001	8.49947	6.8042	11.0979	11.9937	2.76076	8.44964	13.3238	10.7996	8.93566	6.75731	2.68063	8.10316	11.2991	12.5179	9.35745	9.94616	12.1597	9.79141	2.69467	13.1086	4.14632	9.34632	11.7763	2.76777	8.97518	10.2054	10.2724	3.71243
Bacillales	8.05881	6.17432	8.41389	5.90701	5.43413	6.5443	2.53139	4.35832	7.7747	8.9276	4.22244	8.00968	7.6111	9.56964	8.57658	10.1329	7.68792	6.21799	9.89037	11.4369	8.61543	8.3733	8.82946	10.3679	5.30163	5.32217	6.53435	10.8088	3.18045	6.84587	1.55436	4.20412	10.8091	3.94594	8.6205	7.28793
Bacteroidales	13.258	14.8423	14.6263	13.714	15.2119	13.4777	14.2478	12.8463	15.4582	14.4746	15.2886	13.8872	15.876	13.9836	13.0992	13.6967	13.8948	14.3691	13.2346	14.4089	13.9653	14.877	14.6553	13.1474	14.3324	14.5938	13.9308	15.0463	14.5959	13.7772	14.381	14.3606	14.2447	14.1937	14.5428	14.2209
Burkholderiales	0	1.37876	0	1.0516	0	0	0	0	0	0	0	0	0	1.64419	0	3.16513	0	0	0	4.06692	0	1.5094	0	2.28685	0	1.00012	2.97132	0	3.77347	3.75086	2.28513	3.55962	2.25938	2.84326	1.44591	3.02195
Caulobacterales	0	0.848174	0	0	0	0	0	0	0	9.02283	0	0	0	1.64419	5.22717	4.24282	3.5234	0.99452	2.08638	0	1.71123	3.21896	2.06152	0	0	0	0	0	0	0	0	0	0	0	0	0
Clostridiales	17.4236	17.1386	17.194	16.995	15.3688	15.948	15.5936	15.6312	16.7285	17.0535	15.7949	17.0645	15.7822	16.9051	17.2812	17.1608	16.6339	16.6056	17.2477	16.6376	16.3595	17.0129	16.5928	17.2142	16.453	16.5515	15.6088	16.2732	16.1345	17.4063	17.0527	17.4608	17.185	16.8701	17.3305	17.1762
Coriobacteriales	8.15681	8.74792	8.57049	7.00748	7.1879	5.55968	7.05834	5.60164	8.75703	8.9276	7.41995	9.03108	7.85861	8.77775	7.43595	9.18197	6.39292	8.88386	8.78621	9.05193	9.61777	8.3853	10.392	9.36193	5.46001	6.04464	5.13803	7.30443	6.21275	6.86913	5.48884	5.02428	6.01426	6.13572	6.3684	6.284
CW040	0	0	0.887644	0	0	4.76566	0.845496	0	0	0	2.07459	0	0	4.72839	0	0	0	0	3.27175	0	0	3.59473	0	0	0.937546	0	2.97132	0	3.77347	1.80425	3.23172	5.78018	3.7948	3.09574	2.62598	2.88954
Deferribacterales	11.468	10.7621	8.74929	11.4894	7.53157	4.20697	6.59434	7.47426	11.6639	3.41834	6.60536	7.5386	9.39884	11.8965	8.55343	8.56827	4.3283	15.1111	11.833	15.4479	11.8811	5.53137	12.5404	6.53643	9.60374	9.26234	4.12285	10.2949	6.50584	10.9024	4.77994	9.74842	9.62641	7.40788	7.95844	9.61299
Desulfovibrionales	10.8251	1.37876	6.19501	8.51051	0	1.16847	0	2.2198	9.80043	1.91414	0	0	1.54885	9.07931	11.8851	8.68462	6.93325	9.9706	10.6356	10.6417	9.35008	1.91471	10.1662	8.60838	7.77369	3.32215	5.13803	5.23111	6.04665	6.04011	3.58214	9.65644	3.87147	1.90499	4.14312	4.43667
Enterobacteriales	8.9555	10.9709	12.5234	8.79117	6.96218	12.3308	11.5258	8.53329	12.9852	14.4872	10.5238	11.1065	13.5256	12.7207	8.69412	12.7989	10.4719	12.5241	11.9334	9.44219	15.5517	11.6828	14.6554	11.7883	9.98483	10.9631	10.3933	12.4041	8.86043	9.34908	6.56413	7.71548	9.18501	11.7016	10.5341	11.2054
Erysipelotrichales	7.85557	7.65145	9.14339	5.55861	9.00803	9.89636	8.63318	7.06521	10.0428	9.6683	7.73476	12.6442	9.41521	10.023	9.63473	12.0489	8.69109	8.30194	13.1624	11.1487	9.84704	11.0343	12.8513	13.8994	6.38153	6.87061	5.86981	9.27252	10.8612	9.38582	8.8837	7.67504	8.4428	8.56917	8.13696	9.4609
Lactobacillales	12.9338	10.5742	11.2572	14.272	10.9745	12.8126	13.3646	8.958	12.8251	13.5025	11.345	14.9953	13.5734	15.2117	11.7942	14.3602	12.8447	13.7091	13.1096	13.3711	12.727	12.4462	14.1934	12.8271	11.5144	14.4485	9.16593	13.7432	12.4897	12.1755	12.0228	11.153	8.87399	10.1065	9.71159	9.80786
ML615J-28	3.059	4.0183	3.11293	3.41351	0	1.16847	3.93959	0	0	3.59402	5.75494	2.41988	1.54885	4.17039	3.71725	0	0	4.51306	6.28246	0	0	0	0	4.88032	0	1.00012	5.19303	9.24058	0	1.16751	6.10426	6.54131	3.33497	4.0088	4.83741	0
Pseudomonadales	6.21606	5.68409	5.23099	6.18743	3.32917	6.06888	4.27264	5.80412	4.59084	9.29179	5.71138	6.8068	7.39702	8.01242	7.45273	6.40406	8.1424	5.68967	4.19506	6.31828	4.3457	7.18966	6.16775	5.05885	4.27093	5.24817	3.87628	6.1023	0	0	0	2.58026	0	0	0	4.6965
RF32	3.059	8.42414	6.90715	1.65335	2.59167	5.1164	4.63845	4.86032	3.94824	4.53301	5.18327	2.41988	2.27849	6.9327	7.6976	7.702	5.81652	4.44895	6.15679	3.714	6.33277	6.71906	6.08022	7.5185	6.93935	5.70068	3.40321	2.95797	3.89018	3.08362	6.19606	7.2328	5.58404	2.97502	6.06824	7.68243
RF39	7.01961	6.91926	9.46307	6.82841	1.00403	0	6.01682	9.89691	4.40672	6.44021	8.95795	4.36321	7.12578	6.71645	5.63255	7.30753	6.97763	9.31096	8.73216	7.89114	7.97259	7.18966	0	7.3685	8.31144	2.80757	6.37696	7.06283	5.81529	5.78689	6.79975	7.36943	6.95981	7.31144	5.65624	1.64929
Rhizobiales	0	0	2.39253	0	0	2.24586	0	0	1.95875	4.1386	2.54061	1.66704	4.47147	1.64419	3.92389	3.16513	3.39839	1.99177	0	0	0	2.23077	1.0413	2.28685	0	0	0	0	0	0	0	0.871907	0	0.753833	0	0
SHA-98	0	0	0	1.65335	0	0	1.76156	0	0	2.9859	3.17482	0	0	0	0	0	0	0	0	0	0	0	0	0	0	0	0	0	0	2.0411	1.55436	0	0	0	2.48498	0.775904
Sphingobacteriales	0	0	0	0	0	0	0	0	0	6.32036	0	2.41988	0	0	1.59713	2.31762	1.94983	0	0	1.14553	0	3.48002	0	0	0	0	1.90189	0	0	0	0	0	0	0	0	0
Turicibacterales	5.91854	4.89763	5.47112	6.24978	3.46675	3.8802	2.0661	3.056	2.41437	5.50151	0	1.66704	5.77935	0	6.24678	2.31762	2.9413	2.9904	2.08638	0	5.30978	2.48988	2.87745	10.5319	3.20749	5.39256	0	1.89069	2.75731	1.52073	8.0503	2.76777	4.31754	3.09574	3.35	2.18945
Verrucomicrobiales	13.6096	14.7036	14.5796	15.2022	16.9774	16.9231	16.9743	17.2112	15.1616	13.7972	16.7277	13.7746	16.0943	14.3904	14.5607	13.472	16.3784	14.9815	14.0855	14.4744	15.5338	14.9415	14.2028	14.2649	16.496	16.0062	17.143	16.0337	16.7057	13.74	15.5131	12.6435	15.2699	16.0404	14.2289	15.2894
Xanthomonadales	0	0	0	0	0	0	0	0	0	0	0	0	0	0	0	0	0	0.99452	0	0	0	0	0	0	0	2.00019	0	0	0	0	0	0	0	0	0	0
YS2	5.49197	5.96848	4.23674	4.26588	1.00403	1.16847	4.27264	4.91965	3.94824	5.45673	4.34152	5.90067	5.50126	6.98206	3.18612	3.45453	2.9413	0.99452	8.93718	5.59332	2.74114	7.96238	6.1026	5.75556	2.88886	0	8.03555	7.40005	7.40776	4.76399	2.08011	6.00194	4.6138	8.12735	6.84306	0

## Sheet: Fam_C09C11_Biofood_norm
Tax	HFS_1_MB19470	HFS_2_MB19471	HFS_3_MB19472	HFS_4_MB19473	HFS_5_MB19474	HFS_7_MB19475	HFS_8_MB19476	KEF_1_MB19477	KEF_6_MB19478	KEF_8_MB19479	KEF_11_MB19480	KpP_1_MB19481	KpP_5_MB19482	KpP_7_MB19483	KpP_8_MB19484	KpP_9_MB19485	KpP_10_MB19486	P_3_MB19487	P_4_MB19488	P_5_MB19489	P_7_MB19490	P_8_MB19491	P_9_MB19492	P_11_MB19493	LACT_3_MB19494	LACT_5_MB19495	LACT_6_MB19496	LACT_8_MB19497	HFS_9_MB20336	HFS_10_MB20337	CECT_2_MB20338	CECT_4_MB20339	CECT_5_MB20340	CECT_8_MB20341	CECT_9_MB20342	CECT_10_MB20343
[Acidaminobacteraceae]	0.859877	0	0	1.0516	0	0	0	0	0	1.25365	0	0	0	0	0	0	1.54045	0	1.05816	1.14553	0	1.5094	2.65316	0	0	0	0	0	1.44806	3.87859	0	2.36468	2.65603	0	1.10404	0
Aerococcaceae	3.53524	3.78697	5.89871	4.41843	5.3654	6.48525	6.41734	5.52729	5.80368	11.0736	4.64914	4.97539	6.57541	9.17261	8.72207	8.08739	8.58393	5.79657	8.60961	6.31828	5.91011	4.53376	9.1393	4.15485	1.90528	5.2097	4.23194	3.99047	4.68783	4.85998	3.32762	3.83605	2.01088	1.24643	1.72208	4.88218
Alcaligenaceae	0	0	0	0	0	0	0	0	0	0	0	0	0	0	0	0	0	0	0	0	0	0	0	0	0	0	0	0	0	0	0.718684	0.871907	1.71048	0	0	0
Anaeroplasmataceae	8.85245	12.3562	3.48566	12.715	2.59167	5.59735	9.58271	8.58001	8.49947	6.8042	11.0968	11.9937	2.76076	8.44964	13.3238	10.7979	8.93566	6.75731	2.41388	8.10316	11.2991	12.517	9.35745	9.94616	12.1597	9.79141	2.69467	13.1077	4.04925	9.34355	11.775	1.41151	8.97083	10.2054	10.2683	3.14321
Bacillaceae	7.50703	0	2.9637	2.07672	0	0	0	0	6.96753	3.21826	3.61387	4.50819	0	0	3.18612	0	0	0	5.28093	11.3887	8.07349	6.27887	2.87745	10.2534	0	0	3.20337	10.7362	0.656391	4.05119	1.55436	2.36468	10.8005	0.753833	8.61416	6.17445
Bacteroidaceae	9.91074	11.9541	12.2489	9.26111	8.99672	11.9837	11.0888	11.9349	12.3903	12.0976	9.04387	12.24	13.7074	11.1137	11.3553	11.8974	10.3485	10.6526	8.02649	10.4247	13.2542	11.1331	11.6795	10.5205	10.6973	11.091	7.4268	11.3678	10.3705	10.1884	9.76501	8.09416	9.86544	12.5744	9.32487	10.5276
[Barnesiellaceae]	0	0	0	0	0	0	0	0	0	0	0	0	0	0	0	0	1.54045	0	0	0	0	0	0	0	0	0	0	0	0	0	0	0	0	0	0	0
Bradyrhizobiaceae	0	0	2.39253	0	0	1.80548	0	0	1.95875	0	0	0	0	0	0	0	1.94983	0	0	0	0	0	1.0413	1.19742	0	0	0	0	0	0	0	0.871907	0	0.753833	0	0
Caulobacteraceae	0	0.848174	0	0	0	0	0	0	0	9.02283	0	0	0	1.64419	5.22717	4.24282	3.5234	0.99452	2.08638	0	1.71123	3.21896	2.06152	0	0	0	0	0	0	0	0	0	0	0	0	0
Christensenellaceae	9.29193	8.9435	9.5126	7.60867	6.23676	6.22142	6.10297	6.98415	8.39197	10.9171	5.8383	8.9698	8.45739	10.3131	9.13971	10.1832	7.90453	9.78507	9.77213	10.1524	7.97259	10.3313	11.3541	9.80103	6.15938	6.61496	6.67624	8.12896	9.32308	10.3201	9.70378	9.42691	8.60316	6.92817	8.46726	9.31849
Clostridiaceae	11.4022	10.4965	10.1933	10.07	8.09548	12.7241	3.50582	6.60489	10.1122	11.1695	9.96115	5.07186	11.4258	7.86235	9.95335	5.77607	5.81652	5.94339	7.793	5.76395	12.4191	7.14329	5.28877	10.3736	10.1427	10.735	7.39196	3.72099	6.08389	7.56363	11.8945	12.0162	10.0039	11.7293	11.8761	11.3542
Coriobacteriaceae	8.15681	8.74792	8.57049	7.00748	7.1879	5.55968	7.05834	5.60164	8.75703	8.9276	7.41995	9.03108	7.85861	8.77775	7.43595	9.18197	6.39292	8.88386	8.78621	9.04863	9.61777	8.3853	10.392	9.36193	5.46001	6.04464	4.95918	7.30443	6.21275	6.86913	5.48884	5.02428	5.99725	6.10728	6.34819	6.284
Corynebacteriaceae	0	3.17028	5.91912	3.41351	1.59033	1.80548	1.37505	3.427	6.63177	7.31131	1.3819	5.24738	2.76076	5.37117	5.37532	6.40406	5.63447	0	8.7248	0	4.26267	4.796	6.30922	3.1309	0	0	4.51704	4.10842	1.10586	5.08853	0	0	1.33064	0.753833	0	2.39878
Deferribacteraceae	11.468	10.7621	8.74929	11.4894	7.53157	4.20697	6.59434	7.47426	11.6639	3.41834	6.60536	7.5386	9.39884	11.8965	8.55343	8.56827	4.3283	15.1111	11.833	15.4479	11.8811	5.53137	12.5404	6.53643	9.60374	9.26234	4.12285	10.2949	6.50584	10.9024	4.77994	9.74842	9.62641	7.40788	7.95844	9.61299
Dehalobacteriaceae	8.30913	9.38108	8.38115	8.96538	3.17708	4.62684	5.51177	5.03145	8.6261	7.15191	6.55697	7.6677	7.27675	7.52209	9.28262	8.9918	5.79188	6.77048	8.38983	6.27377	6.59282	6.93043	8.49061	8.35275	6.24891	4.24816	4.67994	6.49774	8.25633	8.08445	8.55265	9.02181	7.32273	7.03772	8.14284	7.99994
Desulfovibrionaceae	10.8251	1.37876	6.19501	8.51051	0	1.16847	0	2.2198	9.80043	1.91414	0	0	1.54885	9.07931	11.8851	8.68462	6.93325	9.9706	10.6356	10.6417	9.35008	1.91471	10.1662	8.60838	7.77369	3.32215	5.13803	5.23111	6.04665	6.04011	3.58214	9.65644	3.87147	1.90499	4.14312	4.43667
Enterobacteriaceae	8.9555	10.9709	12.5234	8.79117	6.96218	12.3308	11.5258	8.53329	12.9852	14.4872	10.5238	11.1065	13.5256	12.7207	8.69412	12.7989	10.4719	12.5241	11.9334	9.44219	15.5517	11.6828	14.6554	11.7883	9.98483	10.9631	10.3933	12.4041	8.86043	9.34908	6.56413	7.71548	9.18501	11.7016	10.5341	11.2054
Enterococcaceae	6.47585	7.81418	7.18513	5.00503	3.59234	5.92816	5.46047	5.63742	7.16911	9.69986	5.04974	12.4464	7.12578	10.2003	5.85078	10.01	6.20039	8.57776	10.4291	7.91308	9.34757	9.59951	10.3587	9.4066	5.7075	4.95444	2.97132	8.97544	3.71137	6.14546	4.09946	4.74052	3.10025	2.97502	4.71646	4.43667
Erysipelotrichaceae	7.85557	7.63992	9.11933	5.14283	9.00803	9.89636	8.62447	7.06521	10.0428	9.6683	7.71284	12.6442	9.41521	10.023	9.60877	12.0393	8.66758	8.26052	13.1624	11.1487	9.84704	11.0337	12.8507	13.8987	6.06392	6.44319	5.19303	9.27252	10.8585	9.38448	8.8274	7.67504	8.4428	8.56917	8.10719	9.4609
Eubacteriaceae	1.78436	3.17028	0.887644	0	2.00604	0	0.845496	0	4.40672	4.02049	0	4.50819	0	2.39272	0	2.31762	2.74987	2.79795	2.68063	3.9586	2.47217	2.9	4.9857	2.28685	0	0	0	2.33976	0	1.80425	0	0	0	0	1.72208	0
F16	0	0	0.887644	0	0	4.76566	0.845496	0	0	0	2.07459	0	0	4.72839	0	0	0	0	3.27175	0	0	3.59473	0	0	0.937546	0	2.97132	0	3.77347	1.80425	3.23172	5.78018	3.7948	3.09574	2.62598	2.88954
Lachnospiraceae	15.5069	15.6525	14.1097	13.7136	13.1104	10.9181	11.3105	13.296	15.3251	15.1824	13.3377	15.1173	13.4074	14.8966	15.0952	15.0586	15.2918	14.7909	15.2961	14.8804	14.7076	15.3728	14.8232	15.8316	13.9126	11.182	13.1722	13.8429	14.2073	15.5762	14.7172	15.541	15.8069	14.8362	15.1215	15.0038
Lactobacillaceae	12.5275	9.23162	10.1486	14.2305	10.5394	12.6426	13.2987	7.53243	12.227	12.5497	11.0819	14.5296	13.3758	15.0627	11.152	13.9282	12.5191	13.2508	11.643	12.8546	11.7202	10.7149	13.559	12.1883	11.2996	14.4193	8.75972	12.4102	12.439	11.9688	11.9902	10.6518	8.53113	9.83455	8.77991	9.24418
Methylobacteriaceae	0	0	0	0	0	0	0	0	0	0	0	0	0	0	0	0	0	1.99177	0	0	0	0	0	0	0	0	0	0	0	0	0	0	0	0	0	0
Microbacteriaceae	0	0	0	0	0	0	0	0	0	0	0	0	2.76076	0	0	0	0	0	0	0	0	0	0	0	0	0	0	0	0	0	0	0	0	0	0	0
Micrococcaceae	8.41281	9.63157	11.0611	8.96538	9.30724	8.7861	8.22032	8.73255	9.94478	10.872	7.27787	7.69825	8.34226	7.98846	8.70816	12.1542	7.7659	11.216	8.0909	11.3965	10.2338	9.82776	12.912	9.42301	6.30008	7.45146	6.08867	5.06598	9.64507	11.3474	6.3638	7.24074	7.97588	8.38893	7.91099	8.92918
[Mogibacteriaceae]	6.82596	4.77649	6.39772	5.9577	0	0	0	4.26989	3.47318	5.66789	4.34152	6.05026	5.67446	5.44342	8.03494	7.02807	5.63447	5.66166	5.11063	5.7314	4.26267	7.37764	7.17891	6.43225	0	3.00022	1.24398	3.38935	7.77713	4.62518	6.86514	6.14418	5.73531	2.35547	5.62298	5.3024
Moraxellaceae	6.21606	5.68409	5.19796	6.14432	3.32917	6.06888	4.27264	5.80412	4.59084	9.29179	5.71138	6.8068	7.39702	8.01242	7.45273	6.40406	8.1424	5.57421	4.19506	6.31828	4.3457	7.18966	6.16775	5.05885	4.27093	5.24817	3.87628	6.1023	0	0	0	2.58026	0	0	0	4.6965
Mycobacteriaceae	0	0	0	0	0	0	0	0	2.41437	0	0	0	0	0	0	0	0	0	0	0	0	0	0	0	0	0	0	0	0	0	0	0	0	0	0	0
[Odoribacteraceae]	9.17273	9.35134	9.25198	9.8	1.00403	11.3325	10.3138	0	0	2.7088	2.07459	6.18578	9.84491	1.64419	2.82297	1.58137	0	1.99177	2.68063	0	0	2.23077	8.82946	8.29452	0	11.8036	10.6359	9.70347	10.0923	8.86564	4.77994	11.8089	4.47326	3.58259	4.5136	4.61498
Oxalobacteraceae	0	1.37876	0	1.0516	0	0	0	0	0	0	0	0	0	1.64419	0	3.16513	0	0	0	4.06692	0	1.5094	0	2.28685	0	1.00012	2.97132	0	3.77347	3.75086	2.08011	3.4543	1.33064	2.84326	1.44591	3.02195
Paenibacillaceae	0	0	0	0	0	0	0	0	0	0	0	0	2.76076	0	0	0	0	0	0	0	0	0	0	0	0	0	0	0	0	0	0	0	0	0	0	0
[Paraprevotellaceae]	0	0	0	0	0	0	0	0	0	0	0	0	0	0	0	0	0	0	0	0	0	0	0	0	0	0	0	0	2.98434	2.42272	0.718684	2.58026	1.33064	0	1.10404	0
Peptococcaceae	8.91711	10.056	9.08361	9.03195	9.38741	6.61946	8.85547	12.0556	11.8339	9.57449	9.08711	8.77578	10.3303	6.39066	7.66917	10.7702	8.79084	8.68601	8.08516	7.7439	5.67346	11.7105	11.1748	9.7104	8.26068	9.72647	5.99891	7.06283	11.2685	8.79251	13.3694	9.81507	8.45531	11.5991	10.2521	13.7775
Peptostreptococcaceae	11.7732	12.4064	12.8027	12.8077	13.7262	15.4606	8.96305	12.9112	13.6337	12.8712	12.2829	9.93988	13.293	9.67843	12.6983	9.03079	12.6038	10.4637	10.0855	9.06505	13.9287	11.5362	11.5434	13.5434	13.041	13.0499	11.6066	8.91197	9.74822	10.251	12.237	11.9952	10.967	11.5431	13.302	12.8965
Planococcaceae	5.07019	2.7228	5.998	5.00503	5.40017	6.09545	1.76156	4.17569	5.68725	5.31341	0	7.33982	6.88846	5.91935	6.83822	5.87734	5.42609	3.69031	6.39805	5.26981	5.57365	7.81635	5.12345	3.50416	4.40162	3.80759	5.9677	4.87947	0	5.23894	0	3.83605	0	2.14774	0	0
Porphyromonadaceae	11.7399	14.3333	13.4843	12.9553	14.6288	11.3374	13.2852	10.938	14.7667	13.7381	14.9976	13.1349	15.0385	12.6152	10.1969	12.9789	12.9392	13.6494	11.7696	13.6819	12.2288	13.5836	13.5649	12.2692	13.1911	12.0734	12.9328	14.1618	12.5323	12.9286	13.0594	12.2869	12.6278	12.0123	12.8508	13.2419
Prevotellaceae	0.859877	0.848174	0	2.07672	0	2.85572	0	0	0	2.36551	2.54061	3.27836	6.24997	3.78182	3.47599	3.16513	2.9413	1.57765	0	1.14553	1.71123	3.06828	3.77579	2.62602	0	3.00022	3.20337	0	4.48007	2.58134	6.59336	2.76777	3.53679	1.24643	3.70823	2.18945
Pseudomonadaceae	0	0	0.887644	1.65335	0	0	0	0	0	0	0	0	0	0	0	0	0	2.31315	0	0	0	0	0	0	0	0	0	0	0	0	0	0	0	0	0	0
Rhizobiaceae	0	0	0	0	0	1.16847	0	0	0	4.1386	2.54061	1.66704	4.47147	1.64419	3.92389	3.16513	2.9413	0	0	0	0	2.23077	0	1.84261	0	0	0	0	0	0	0	0	0	0	0	0
Rikenellaceae	5.75402	7.27279	9.27394	9.615	11.2089	7.71849	9.94303	7.76049	6.58915	8.86472	11.5335	8.32561	9.57309	8.12655	7.02929	7.46225	9.83516	7.53597	9.79516	7.12101	7.55075	11.1176	10.7378	6.82676	8.34432	10.3979	10.3546	9.56848	9.9185	9.20724	10.5234	10.6526	10.9085	9.05202	11.0985	8.89721
Ruminococcaceae	16.4089	15.7018	16.576	15.2626	14.0026	11.4734	14.4521	14.2499	15.1439	16.0465	15.0104	16.3241	14.3969	16.0741	16.2913	16.1935	14.6458	15.5527	16.2224	15.8064	14.6795	15.9091	15.6562	16.0528	15.0817	15.5481	14.8074	15.4738	15.2216	16.6061	15.8383	16.6575	15.9095	15.8022	16.2807	15.8116
S24-7	12.2236	11.9491	12.9167	11.6468	13.2502	10.9494	12.2989	10.3139	13.5117	12.0518	11.891	9.84751	13.4709	12.8555	12.2401	10.2366	12.3304	12.6694	12.2852	12.7934	10.2728	13.703	13.0076	11.1291	13.1809	13.6992	12.2024	13.4608	13.9106	11.9656	13.3336	13.3525	13.3128	12.9587	13.7323	12.8577
Sphingobacteriaceae	0	0	0	0	0	0	0	0	0	6.32036	0	2.41988	0	0	1.59713	2.31762	1.94983	0	0	1.14553	0	3.48002	0	0	0	0	1.90189	0	0	0	0	0	0	0	0	0
Staphylococcaceae	5.73207	6.05784	8.084	4.68229	1.00403	4.69792	1.76156	1.78193	5.46951	8.78093	2.89229	5.47614	6.17505	9.45196	8.02376	10.0567	7.35938	5.96647	9.69134	5.76395	6.27038	4.34998	8.68488	6.51619	4.27093	4.75513	4.12285	5.92074	3.08572	5.77051	0	0	3.53679	3.49748	1.44591	6.41019
Streptococcaceae	10.8322	9.4254	10.1169	8.99602	8.88761	9.34943	8.42818	7.77662	11.146	11.3586	8.56391	11.732	10.3749	10.9467	9.64206	12.0159	10.0109	11.6481	11.9198	11.4871	11.3973	11.5985	12.2264	10.8964	8.45758	8.58145	6.87435	12.9205	7.34779	9.02425	6.10426	9.29967	6.486	7.50918	8.54035	7.91734
Succinivibrionaceae	0	0	0	0	0	0	0	0	0	0	0	0	0	0	0	0	0	0	0	0	0	1.5094	0	0	0	0	0	1.23515	0	0	0	0	0	0	0	0
Turicibacteraceae	5.91854	4.89763	5.47112	6.24978	3.46675	3.8802	2.0661	3.056	2.41437	5.50151	0	1.66704	5.77935	0	6.24678	2.31762	2.9413	2.9904	2.08638	0	5.30978	2.48988	2.87745	10.5319	3.20749	5.39256	0	1.89069	2.75731	1.52073	8.0503	2.76777	4.31754	3.09574	3.35	2.18945
Veillonellaceae	1.39493	0	0	0	0	0	0	0	0	0	0	0	5.72786	0	0	0	1.54045	0	0	0	0	0	0	0	0	0	0	0	0	0	0	0	0	0	0	0
Verrucomicrobiaceae	13.6096	14.7036	14.5796	15.2022	16.9774	16.9231	16.9743	17.2112	15.1616	13.7972	16.7277	13.7746	16.0943	14.3904	14.5607	13.472	16.3784	14.9815	14.0855	14.4744	15.5338	14.9415	14.2028	14.2649	16.496	16.0062	17.143	16.0337	16.7057	13.74	15.513	12.6435	15.2699	16.0404	14.2288	15.2894
Xanthomonadaceae	0	0	0	0	0	0	0	0	0	0	0	0	0	0	0	0	0	0.99452	0	0	0	0	0	0	0	2.00019	0	0	0	0	0	0	0	0	0	0
Yaniellaceae	0	0	0	0	0	0	0	0	0	0	0	0	0	0	1.59713	0	0	0	0	0	0	0.943706	0	0	0	0	1.24398	0	0	0	0	0	0	2.14774	0	0

## Sheet: Genus_C09C11_Biofood_norm
Tax	HFS_1_MB19470	HFS_2_MB19471	HFS_3_MB19472	HFS_4_MB19473	HFS_5_MB19474	HFS_7_MB19475	HFS_8_MB19476	KEF_1_MB19477	KEF_6_MB19478	KEF_8_MB19479	KEF_11_MB19480	KpP_1_MB19481	KpP_5_MB19482	KpP_7_MB19483	KpP_8_MB19484	KpP_9_MB19485	KpP_10_MB19486	P_3_MB19487	P_4_MB19488	P_5_MB19489	P_7_MB19490	P_8_MB19491	P_9_MB19492	P_11_MB19493	LACT_3_MB19494	LACT_5_MB19495	LACT_6_MB19496	LACT_8_MB19497	HFS_9_MB20336	HFS_10_MB20337	CECT_2_MB20338	CECT_4_MB20339	CECT_5_MB20340	CECT_8_MB20341	CECT_9_MB20342	CECT_10_MB20343
Acinetobacter	6.21606	5.68409	5.19796	6.14432	3.32917	6.06888	4.27264	5.80412	4.59084	9.29179	5.71138	6.8068	7.39702	8.01242	7.45273	6.40406	8.1424	5.57421	4.19506	6.31828	4.3457	7.18966	6.16775	5.05885	4.27093	5.24817	3.87628	6.1023	0	0	0	2.58026	0	0	0	4.6965
Adlercreutzia	8.15269	8.74792	8.57049	7.00748	7.1879	5.55968	6.50855	5.60164	8.75703	8.91524	7.39263	9.02507	7.85861	8.77775	7.43595	9.18197	6.39292	8.88386	8.772	9.03869	9.61777	8.37731	10.384	9.36193	5.46001	6.04464	4.89427	7.26687	6.03402	6.74052	5.31255	4.94874	5.99725	5.65567	6.31732	6.284
Aerococcus	3.31668	2.7228	3.11293	0	1.00403	0	0	0	3.0388	11.0092	2.07459	4.76062	6.05482	9.02736	8.59181	7.04993	8.43673	3.79716	8.58135	3.84148	4.76317	3.21896	8.26109	2.62602	0	2.00019	2.69467	1.89069	0	3.08362	0	3.21736	0	0.753833	0	0
AF12	0	0	0.887644	0	0	1.16847	0	0	0	0	1.3819	0	0	1.64419	0	0	0	0	0	0	0	0.943706	0	0	0	0	0	0	3.18045	3.2815	3.12898	8.17097	3.87147	2.53701	2.98137	3.71243
Agrobacterium	0	0	0	0	0	1.16847	0	0	0	4.1386	2.54061	1.66704	4.47147	1.64419	3.92389	3.16513	2.9413	0	0	0	0	2.23077	0	1.84261	0	0	0	0	0	0	0	0	0	0	0	0
Agromyces	0	0	0	0	0	0	0	0	0	0	0	0	2.76076	0	0	0	0	0	0	0	0	0	0	0	0	0	0	0	0	0	0	0	0	0	0	0
Akkermansia	13.6096	14.7035	14.5796	15.2022	16.9773	16.9231	16.9742	17.2111	15.1616	13.7972	16.7276	13.7746	16.0941	14.3902	14.5607	13.472	16.3783	14.9813	14.0855	14.4744	15.5336	14.9414	14.2028	14.2649	16.4958	16.0061	17.1429	16.0337	16.7057	13.74	15.513	12.6435	15.2699	16.0404	14.2288	15.2894
Allobaculum	4.47164	0	0.887644	1.0516	2.81426	3.6123	2.31742	1.15019	4.50171	0	0	8.98227	0	0	0	0	3.26151	0	0	3.57416	4.70145	0	0	1.84261	1.90528	3.00022	1.24398	2.95797	8.28059	3.99592	8.2161	2.93369	3.53679	4.0088	2.75442	3.54645
Anaerofustis	1.78436	3.17028	0.887644	0	2.00604	0	0.845496	0	4.40672	4.02049	0	4.50819	0	2.39272	0	2.31762	2.74987	2.79795	2.68063	3.9586	2.47217	2.9	4.9857	2.28685	0	0	0	2.33976	0	1.80425	0	0	0	0	1.72208	0
Anaeroplasma	8.85245	12.3558	3.48566	12.7145	2.59167	5.59735	9.58271	8.58001	8.49947	6.8042	11.0947	11.9929	2.76076	8.44964	13.3238	10.7963	8.93566	6.75731	2.41388	8.10316	11.2985	12.5168	9.35745	9.94427	12.1586	9.78652	2.69467	13.1061	4.04925	9.34355	11.7744	1.41151	8.96209	10.2029	10.2683	3.14321
Anaerostipes	0	0	0	0	0	0	0	0	0	0	0	0	0	0	0	0	0	0	0	0	0	0	1.63977	1.19742	0	0	0	0	0	2.0411	0	0	0	0	0	1.2777
Anaerotruncus	0.859877	0	0	1.0516	0	0	0	0	0	0	0	0	0	0	0	0	0	0	1.66199	0	0	0	0	1.19742	0.937546	0	1.24398	1.89069	0	0	0	0	1.33064	0	0	0
Arthrobacter	0	0	0	0	0	0	0	0	0	7.63645	1.3819	2.91205	1.54885	4.94299	4.77242	1.58137	4.45926	0	2.41388	0	0	1.5094	3.98306	0	0.937546	0	1.24398	0	0.656391	0	0	0	0	0	0	0.775904
Atopobium	0	0	0	0	0	0	0	0	0	0	0	0	0	0	0	0	0	0	0	0	0	0	0	0	0	0	0	0	0.656391	3.08362	0	0	0	0.753833	0.655151	0
Bacillus	0	0	2.9637	0	0	0	0	0	0	3.21826	3.61387	3.27836	0	0	3.18612	0	0	0	5.11063	0	0	6.2616	2.87745	1.84261	0	0	3.20337	0	0.656391	3.75086	1.55436	2.36468	1.71048	0.753833	1.72208	1.2777
Bacteroides	9.91074	11.9541	12.2489	9.26111	8.99672	11.9837	11.0888	11.9349	12.3903	12.0976	9.04387	12.24	13.7074	11.1137	11.3553	11.8974	10.3485	10.6526	8.02649	10.4247	13.2542	11.1331	11.6795	10.5205	10.6973	11.091	7.4268	11.3678	10.3705	10.1884	9.76501	8.09416	9.86544	12.5744	9.32487	10.5276
Bilophila	10.8251	1.37876	6.19501	8.51051	0	1.16847	0	2.2198	9.80043	1.91414	0	0	1.54885	9.07931	11.8851	8.68462	6.93325	9.9706	10.6356	10.6417	9.35008	1.91471	10.1662	8.60838	7.77369	3.32215	5.13803	5.23111	6.03402	5.92646	1.84106	9.64601	2.96682	1.61297	3.57541	3.86126
Blautia	11.6015	12.4945	11.992	10.0052	11.9025	8.11243	9.82378	10.5806	13.4466	13.2453	9.31156	14.1465	12.5298	11.6799	11.3452	12.7717	11.0478	10.7118	13.4613	12.1038	11.528	13.473	14.0239	13.8689	8.04265	7.51595	8.4226	10.2792	10.9837	13.2297	10.1903	10.7044	10.7851	12.099	12.2307	12.1267
Brevundimonas	0	0.848174	0	0	0	0	0	0	0	9.02283	0	0	0	1.64419	5.22717	4.24282	3.5234	0.99452	2.08638	0	1.71123	3.21896	2.06152	0	0	0	0	0	0	0	0	0	0	0	0	0
Butyrivibrio	3.81128	0	0	1.0516	0	0	0	0	0	0	0	1.66704	0	0	0	0	0	1.57765	0	0	0	0	0	0	0	0	0	0	0	0	1.84106	0	0	0	0	0
Clostridium	0.859877	4.64424	1.82801	0	1.00403	1.80548	0	0	4.59084	5.26228	0	0	0	0	0	0	0	0	0	0	6.45	0	0	2.28685	0.937546	4.0877	0	0	0	0	2.28513	3.83605	4.52165	5.08495	2.32868	4.61498
Coprobacillus	3.31668	6.85089	8.57693	1.0516	2.00604	0	1.37505	4.7338	7.32011	4.84242	4.09265	9.55797	5.96871	7.30655	8.2129	9.04174	0	3.89664	6.13474	8.47653	7.91937	5.79401	5.47188	5.68478	2.69858	4.32216	4.75498	5.78561	2.3314	3.08362	4.04407	3.55962	4.4232	4.79516	5.46299	6.72387
Coprococcus	11.5581	12.6688	10.2895	10.4589	10.5511	6.46501	5.78628	8.22179	11.1579	11.1424	10.4177	12.3595	9.07229	11.9793	11.8688	11.6666	8.62636	11.7655	13.108	11.369	10.7158	11.7969	11.1978	12.4687	8.30311	7.11919	7.48306	9.92661	12.2767	12.786	12.8123	12.6952	13.6337	10.9444	12.4589	12.7913
Corynebacterium	0	3.17028	5.91912	3.41351	1.59033	1.80548	1.37505	3.427	6.63177	7.31131	1.3819	5.24738	2.76076	5.37117	5.37532	6.40406	5.63447	0	8.71369	0	4.26267	4.796	6.30922	3.1309	0	0	4.51704	4.10842	1.10586	5.08853	0	0	0.813581	0.753833	0	2.39878
Dehalobacterium	8.29423	9.38108	8.38115	8.95607	3.17708	4.62684	5.51177	5.03145	8.6261	7.15191	6.55697	7.6677	7.27675	7.52209	9.28262	8.9918	5.79188	6.77048	8.38983	6.27377	6.59282	6.93043	8.49061	8.34704	6.24891	4.24816	4.67994	6.49774	8.25361	8.08445	8.55017	9.02181	7.32273	7.03772	8.14284	7.99994
Desulfovibrio	0	0	0	0	0	0	0	0	0	0	0	0	0	0	0	0	0	0	0	0	0	0	0	0	0	0	0	0	0.656391	2.58134	3.23172	2.76777	2.96682	0.753833	2.75442	3.02195
Dialister	1.39493	0	0	0	0	0	0	0	0	0	0	0	0	0	0	0	1.54045	0	0	0	0	0	0	0	0	0	0	0	0	0	0	0	0	0	0	0
Dorea	9.21884	9.1808	8.14594	4.90526	5.81526	4.20697	3.69524	5.95354	9.34569	10.9965	6.19526	8.38315	5.87714	9.2801	8.10029	9.00864	5.68887	6.60384	8.68742	8.28797	7.86411	10.1579	6.79495	10.695	7.25677	5.45968	6.71434	9.23086	11.7698	9.29858	9.56801	8.97736	10.4294	9.4701	9.92196	9.28593
Enterococcus	6.47585	7.81418	7.18513	5.00503	3.59234	5.92816	5.46047	5.63742	7.16911	9.69986	5.04974	12.4464	7.12578	10.2003	5.85078	10.01	6.20039	8.57776	10.4291	7.91308	9.34757	9.59951	10.3587	9.4066	5.7075	4.95444	2.97132	8.97544	3.71137	6.14546	4.09946	4.74052	3.10025	2.97502	4.71646	4.43667
Ethanoligenens	0	0	0	0	0	0	0	0	0	0	0	0	1.54885	0	1.59713	2.80274	0	0	0	1.77592	0	0	0	0	0	0	0	0	0	0	0	0	0	0	0	0
[Eubacterium]	5.32605	5.35794	5.41473	4.00176	5.09527	8.48824	7.8336	6.30458	7.45679	8.9957	6.25716	8.49177	6.45389	7.60319	7.90687	8.9342	5.86458	7.42371	8.07362	6.00087	6.43111	8.76496	10.6664	11.3031	5.62962	5.00024	1.90189	5.42545	7.88655	8.43289	0	6.74484	4.85947	4.52108	6.59117	8.47165
Facklamia	1.39493	3.03597	5.70069	4.41843	5.32978	6.48525	6.41734	5.52729	5.60405	6.57201	4.45151	2.41988	4.90148	5.81426	5.22717	7.1342	5.25636	5.41554	3.10028	6.05448	5.08656	3.89258	8.01187	3.65989	1.90528	5.0877	3.73515	3.72099	4.68783	4.43048	3.32762	2.58026	2.01088	0.753833	1.72208	4.88218
Faecalibacterium	1.39493	0	0	1.0516	0	0	0	0	0	2.36551	0	0	0	0	0	0	0	0	1.05816	0	0	0	1.0413	0	0	0	0	0	0	1.80425	0	0	0	0	0	0
Gluconacetobacter	0	0	0	0	0	0	0	2.2198	0	0	0	0	0	2.88307	0	0	0	0	0	0	0	0	0	0	0	0	0	0	0	0	0	0	0	0	0	0
Holdemania	0	0	7.01539	0	0	0	0	0	0	0	5.57221	5.73376	6.63253	0	0	0	0	0	1.05816	0	4.82236	0	9.25124	4.81554	0	0	0	0	0	0	0	0	0	0	0	0
Jeotgalicoccus	0.859877	0	5.65274	1.0516	0	3.6123	0.845496	0	4.50171	7.85924	2.07459	4.20203	5.56133	9.16194	7.93102	9.04174	6.7535	0	9.43356	0	5.08656	3.06828	5.69455	5.49096	1.90528	4.5238	4.12285	1.23515	2.3314	5.00701	0	0	0	0	0	0
Klebsiella	0	0	0	0	0	0	0	0	0	0	0	0	0	0	0	0	0	0	0	0	1.09572	0	1.63977	0	0	0	0	0	0	0	0	0	0	0	0	0
Lachnobacterium	5.32605	6.23689	3.7816	2.66996	0	0	0	2.2198	6.4048	6.76801	2.07459	5.90067	3.40996	7.12073	3.92389	4.24282	2.9413	3.31205	5.97015	4.06692	5.18003	5.79401	3.39544	6.24814	1.50108	2.00019	3.73515	8.79369	1.44806	5.78689	3.01836	4.32854	4.01358	4.43216	4.5136	4.77366
Lactobacillus	12.5275	9.23162	10.1486	14.2305	10.5394	12.6426	13.2987	7.53243	12.227	12.5497	11.0819	14.5296	13.3758	15.0627	11.152	13.9282	12.5191	13.2508	11.643	12.8546	11.7202	10.7149	13.559	12.1883	11.2996	14.4193	8.75972	12.4102	12.4387	11.967	11.5577	10.2403	8.39165	9.78378	8.02362	8.97687
Lactococcus	10.5472	9.20252	9.87324	8.60496	8.55492	7.9399	6.84492	6.92747	10.9098	11.185	8.02896	11.6336	10.144	10.7753	9.41264	11.853	9.6367	11.3947	11.8153	11.2832	11.2209	11.5416	11.9183	10.7642	7.57335	6.4921	5.39422	12.7681	6.5597	8.64985	5.16457	9.14538	6.09642	7.2081	8.4172	7.60537
Lysinibacillus	0	0	0	0	0	0	0	0	0	0	0	0	0	0	0	0	0	0	0	0	0	2.48988	0	0	0	0	0	0	0	0	0	0	0	0	0	0
Mucispirillum	11.468	10.7621	8.74929	11.4894	7.53157	4.20697	6.59434	7.47426	11.6639	3.41834	6.60536	7.5386	9.39884	11.8965	8.55343	8.56827	4.3283	15.1111	11.833	15.4479	11.8811	5.53137	12.5404	6.53643	9.60374	9.26234	4.12285	10.2949	6.50584	10.9024	4.77994	9.74842	9.62641	7.40788	7.95844	9.61299
Mycobacterium	0	0	0	0	0	0	0	0	2.41437	0	0	0	0	0	0	0	0	0	0	0	0	0	0	0	0	0	0	0	0	0	0	0	0	0	0	0
Odoribacter	9.17273	9.35134	9.25198	9.8	1.00403	11.3325	10.3138	0	0	2.7088	2.07459	6.18578	9.84491	1.64419	2.82297	1.58137	0	1.99177	2.68063	0	0	2.23077	8.82946	8.29452	0	11.8036	10.6359	9.70347	10.0923	8.86564	4.77994	11.8089	4.47326	3.58259	4.5136	4.61498
Oscillospira	16.0189	15.4126	15.0203	14.0892	11.0276	10.5077	11.5192	11.171	14.0895	15.6305	12.8553	13.9609	13.5651	14.7913	15.739	15.2409	13.2648	14.3562	15.7307	14.7399	13.537	14.8676	14.9884	14.1359	12.7457	10.2134	11.728	14.2419	14.0223	15.5477	14.1038	15.5869	13.9803	13.8327	14.2745	14.5422
Paenibacillus	0	0	0	0	0	0	0	0	0	0	0	0	2.76076	0	0	0	0	0	0	0	0	0	0	0	0	0	0	0	0	0	0	0	0	0	0	0
Parabacteroides	11.7399	14.3333	13.4843	12.9553	14.6288	11.3374	13.2852	10.938	14.7667	13.7381	14.9976	13.1349	15.0385	12.6152	10.1969	12.9789	12.9392	13.6494	11.7696	13.6819	12.2288	13.5836	13.5649	12.2692	13.1911	12.0734	12.9328	14.1618	12.5323	12.9286	13.0594	12.2869	12.6278	12.0123	12.8508	13.2419
Pediococcus	0	0	0	0	0	0	0	0	0	0	0	0	0	0	0	0	0	0	0	0	0	0	0	0	0	0	0	0	0	0	10.0409	8.64482	5.06933	4.96328	7.48528	6.6944
Prevotella	0.859877	0.848174	0	2.07672	0	2.85572	0	0	0	2.36551	2.54061	3.27836	6.24997	3.78182	3.47599	3.16513	2.9413	1.57765	0	1.14553	1.71123	3.06828	3.77579	2.62602	0	3.00022	3.20337	0	4.48007	2.58134	6.59336	2.76777	3.53679	1.24643	3.70823	2.18945
[Prevotella]	0	0	0	0	0	0	0	0	0	0	0	0	0	0	0	0	0	0	0	0	0	0	0	0	0	0	0	0	2.98434	2.42272	0.718684	2.58026	1.33064	0	1.10404	0
Proteus	0	0	0	0	0	0	0	0	0	0	0	2.91205	0	0	0	0	0	0	0	0	1.09572	0	1.0413	0	0	0	0	0	0	0	0	0	0	0	0	0
Pseudomonas	0	0	0.887644	1.65335	0	0	0	0	0	0	0	0	0	0	0	0	0	2.31315	0	0	0	0	0	0	0	0	0	0	0	0	0	0	0	0	0	0
rc4-4	8.91711	10.056	9.08361	9.03195	9.38741	6.61946	8.85547	12.0556	11.8339	9.57449	9.08711	8.77578	10.3303	6.39066	7.66917	10.7702	8.79084	8.49684	8.08516	7.7439	5.67346	11.7105	11.1748	9.7104	8.26068	9.72647	5.99891	7.03331	11.2681	8.78438	13.3674	9.41292	8.44907	11.5988	10.2501	13.7771
Roseburia	6.30795	6.26718	5.23099	1.65335	0	0	0	1.15019	8.39197	2.9859	0	5.40384	4.80539	2.88307	6.55717	5.66714	0.966747	0.99452	5.43324	5.94518	4.17456	4.69674	1.0413	4.43914	0	2.32213	2.69467	5.06598	3.08572	7.37614	4.71048	3.91756	5.98004	2.97502	5.1017	4.28679
Rothia	8.41281	9.63157	11.0611	8.96538	9.30724	8.7861	8.22032	8.73255	9.94478	10.711	7.26286	7.65218	8.33367	7.80865	8.61435	12.1535	7.61955	11.216	8.06781	11.3965	10.2338	9.82483	12.9092	9.42301	6.28323	7.45146	6.05937	5.06598	9.64404	11.3474	6.3638	7.24074	7.97588	8.38893	7.91099	8.92708
Ruminococcus	12.2378	11.6551	12.7182	11.5842	7.95053	10.0888	5.90615	7.91426	9.91273	11.0072	10.5079	13.5023	8.94278	12.6844	13.3759	12.8968	12.3121	11.4627	13.6321	12.3035	11.141	11.9726	10.8578	13.4374	10.9618	8.82043	8.90271	13.6244	9.0989	13.3233	12.4394	13.042	12.5081	12.0548	14.7806	12.0082
[Ruminococcus]	13.1431	12.9437	12.4628	9.5607	10.6024	9.19828	8.80752	11.1015	14.2598	13.6729	11.0174	12.8007	10.9149	12.4573	12.6142	13.3682	12.588	12.597	13.0641	14.026	14.0177	13.8276	10.8455	14.5342	10.1345	9.40752	11.7453	12.7381	12.2	14.049	12.8331	12.3748	14.1232	13.2871	12.7855	13.2765
Salmonella	0	0.848174	0	0	5.40017	2.24586	0	2.55526	0	10.9161	3.95001	8.93816	10.7617	12.0734	3.18612	9.19674	5.42609	0.99452	0	1.77592	2.1413	2.9	0	0	0	1.00012	0	0	0	2.72423	0	0	0	0	0	0
SMB53	0	0	0	0	0	0	0	0	0	0	0	0	0	0	0	0	0	0	0	0	0	0	0	1.84261	0	0	0	0	0	0	0	0	0	0	0	0
Solibacillus	2.74506	2.7228	0	4.68229	5.40017	0	0.845496	0	1.28902	4.02049	0	4.20203	5.67446	0	0	1.58137	3.63844	3.69031	0	4.43354	5.57365	2.48988	1.0413	0	1.50108	3.70067	0	4.66523	0	0	0	0	0	0	0	0
Sphingobacterium	0	0	0	0	0	0	0	0	0	6.32036	0	2.41988	0	0	1.59713	2.31762	1.94983	0	0	1.14553	0	3.48002	0	0	0	0	1.90189	0	0	0	0	0	0	0	0	0
Sporosarcina	4.80174	0	5.97868	2.89471	0	3.08515	1.37505	2.82724	5.64625	4.6168	0	7.17584	6.05482	4.72839	6.83822	5.77607	4.97919	0	6.37942	4.16767	0	7.52958	5.07898	2.28685	4.27093	1.00012	5.90318	2.33976	0	5.23894	0	3.83605	0	2.14774	0	0
Staphylococcus	5.70978	6.05784	7.79467	4.62071	1.00403	3.8802	1.37505	1.78193	4.50171	7.70506	2.07459	4.76062	4.70243	7.00611	4.1046	9.0741	5.84075	5.96647	7.09047	5.76395	5.46641	3.701	8.49485	5.57164	4.04959	2.32213	0	5.88812	2.15601	4.55042	0	0	3.53679	3.49748	1.44591	6.41019
Stenotrophomonas	0	0	0	0	0	0	0	0	0	0	0	0	0	0	0	0	0	0.99452	0	0	0	0	0	0	0	2.00019	0	0	0	0	0	0	0	0	0	0
Streptococcus	8.35653	6.63557	7.43947	6.93344	6.62268	8.67158	7.84864	6.62285	8.42264	8.22234	6.88566	7.81435	7.62524	7.79491	6.88842	8.79228	7.88718	9.01695	8.08516	8.56693	8.28288	6.91946	9.84955	7.3909	7.34063	8.19992	6.25301	9.60405	6.12019	6.90708	5.08448	6.02051	4.47326	5.14214	4.9756	5.58524
Succinivibrio	0	0	0	0	0	0	0	0	0	0	0	0	0	0	0	0	0	0	0	0	0	1.5094	0	0	0	0	0	1.23515	0	0	0	0	0	0	0	0
Sutterella	0	0	0	0	0	0	0	0	0	0	0	0	0	0	0	0	0	0	0	0	0	0	0	0	0	0	0	0	0	0	0.718684	0.871907	1.71048	0	0	0
Turicibacter	5.91854	4.89763	5.47112	6.24978	3.46675	3.8802	2.0661	3.056	2.41437	5.50151	0	1.66704	5.77935	0	6.24678	2.31762	2.9413	2.9904	2.08638	0	5.30978	2.48988	2.87745	10.5319	3.20749	5.39256	0	1.89069	2.75731	1.52073	8.0503	2.76777	4.31754	3.09574	3.35	2.18945
Yaniella	0	0	0	0	0	0	0	0	0	0	0	0	0	0	1.59713	0	0	0	0	0	0	0.943706	0	0	0	0	1.24398	0	0	0	0	0	0	2.14774	0	0

## Sheet: Species_C09C11_Biofood_norm
Tax	HFS_1_MB19470	HFS_2_MB19471	HFS_3_MB19472	HFS_4_MB19473	HFS_5_MB19474	HFS_7_MB19475	HFS_8_MB19476	KEF_1_MB19477	KEF_6_MB19478	KEF_8_MB19479	KEF_11_MB19480	KpP_1_MB19481	KpP_5_MB19482	KpP_7_MB19483	KpP_8_MB19484	KpP_9_MB19485	KpP_10_MB19486	P_3_MB19487	P_4_MB19488	P_5_MB19489	P_7_MB19490	P_8_MB19491	P_9_MB19492	P_11_MB19493	LACT_3_MB19494	LACT_5_MB19495	LACT_6_MB19496	LACT_8_MB19497	HFS_9_MB20336	HFS_10_MB20337	CECT_2_MB20338	CECT_4_MB20339	CECT_5_MB20340	CECT_8_MB20341	CECT_9_MB20342	CECT_10_MB20343
acidifaciens	8.18536	11.173	11.9216	1.65335	3.59234	7.25949	10.4267	9.91706	11.7898	11.6503	0	9.23235	13.258	8.59947	11.1378	11.2156	10.17	7.78349	7.45323	8.69061	13.1686	9.92279	9.54487	4.35046	9.4404	10.4597	5.48518	10.3662	1.95631	9.08841	0.718684	2.76777	1.71048	11.9319	1.95379	1.64929
acidilactici	0	0	0	0	0	0	0	0	0	0	0	0	0	0	0	0	0	0	0	0	0	0	0	0	0	0	0	0	0	0	10.0409	8.64482	5.06933	4.96328	7.48528	6.6944
aeria	8.41281	9.63157	11.0582	8.96538	9.30724	8.7861	8.22032	8.72426	9.94478	10.711	7.26286	7.65218	8.33367	7.80865	8.61435	12.1535	7.61955	11.2154	8.06781	11.3965	10.2338	9.82483	12.9088	9.42301	6.26617	7.45146	6.05937	5.06598	9.64404	11.346	6.3638	7.24074	7.97588	8.38893	7.91099	8.92708
aureus	2.74506	4.15418	5.16415	4.62071	0	1.80548	0	1.78193	1.28902	4.84242	0	2.41988	3.85608	5.37117	2.82297	6.81484	5.0222	5.87185	4.01362	5.31444	4.87921	2.70946	5.60329	4.74771	2.22066	2.32213	0	5.37927	0	1.80425	0	0	3.33497	2.14774	0	4.6965
boronitolerans	0	0	0	0	0	0	0	0	0	0	0	0	0	0	0	0	0	0	0	0	0	2.48988	0	0	0	0	0	0	0	0	0	0	0	0	0	0
bromii	2.5581	4.59732	7.5017	6.50965	4.70818	1.16847	2.0661	5.77228	5.09606	3.59402	8.97186	12.0014	4.47147	9.05645	6.35783	11.2384	2.52911	0	9.7934	5.48033	3.75586	6.3622	6.72452	11.1563	1.90528	6.75513	0	2.68173	2.15601	9.22538	0.718684	10.9782	4.52165	6.64129	6.62516	11.4032
C21_c20	0	0	0	0	0	0	0	0	0	0	0	0	0	0	0	0	0	0	0	0	0	0	0	0	0	0	0	0	0	0.698767	2.28513	1.80333	0.813581	0	0	0
casseliflavus	0	0.848174	0	1.65335	0	0	0	0	0	1.91414	0	0	0	1.64419	0	0	0	0	0	0	0	3.06828	0	2.90043	0	0	0	0	0	0	0	0	0	0	0	0
coagulans	0	0	0	0	0	0	0	0	0	0	0	0	0	0	0	0	0	0	0	0	0	0	0	0	0	0	0	0	0.656391	1.16751	1.55436	2.36468	1.71048	0.753833	1.72208	1.2777
copri	0	0	0	0	0	0	0	0	0	0	0	0	0	0	0	0	0	0	0	0	1.71123	0	0	0	0	0	0	0	0	0	0	0	0	0	0	0
diminuta	0	0.848174	0	0	0	0	0	0	0	9.02283	0	0	0	1.64419	5.22717	4.24282	3.5234	0.99452	2.08638	0	1.71123	3.21896	2.06152	0	0	0	0	0	0	0	0	0	0	0	0	0
distasonis	0	0	0	1.0516	0	0	0	0	0	0	0	0	0	0	0	0	0	0	0	0	0	0	0	0	0	0	0	0	0	0	0.718684	1.80333	2.01088	1.61297	0	0
dolichum	5.32605	5.35794	5.41473	4.00176	5.09527	8.48824	7.8336	6.30458	7.45679	8.9957	6.25716	8.49177	6.45389	7.60319	7.90687	8.9342	5.86458	7.42371	8.07362	6.00087	6.43111	8.76496	10.6664	11.3031	5.62962	5.00024	1.90189	5.42545	7.88655	8.43289	0	6.74484	4.85947	4.52108	6.59117	8.47165
eggerthii	0	0	0	0	0	1.16847	0	0	0	0	0	0	0	0	0	0	0	0	0	0	0	0	0	0	0	0	0	0	1.95631	0	0	0	0	0	0	0
enterica	0	0.848174	0	0	5.40017	2.24586	0	2.55526	0	10.9161	3.95001	8.93816	10.7617	12.0734	3.18612	9.19674	5.42609	0.99452	0	1.77592	2.1413	2.9	0	0	0	1.00012	0	0	0	2.72423	0	0	0	0	0	0
faecis	6.30795	6.20594	5.23099	1.0516	0	0	0	1.15019	8.34791	2.9859	0	5.40384	4.80539	2.88307	6.55717	5.60943	0.966747	0.99452	5.43324	5.91652	4.17456	4.69674	1.0413	4.43914	0	2.32213	2.69467	5.06598	2.75731	7.35981	4.67445	3.74966	5.94499	2.35547	4.949	4.17746
flavefaciens	11.0228	9.95372	12.0987	11.13	6.00792	9.66316	3.93959	2.82724	7.91074	7.81557	9.32246	11.8775	4.99157	12.179	12.9975	11.056	12.2086	10.612	11.8614	12.0516	9.8909	4.84317	3.39544	12.6016	10.5866	8.02815	8.028	12.8049	2.48776	12.2493	11.5776	10.8543	11.7002	10.859	14.7151	6.49238
geniculata	0	0	0	0	0	0	0	0	0	0	0	0	0	0	0	0	0	0.99452	0	0	0	0	0	0	0	2.00019	0	0	0	0	0	0	0	0	0	0
gnavus	7.32105	5.04478	5.76976	7.49314	0	0	0.845496	1.15019	6.4048	3.41834	2.07459	0	0	5.70092	3.92389	4.24282	0.966747	2.79795	8.39448	5.85741	5.88257	0	1.0413	2.62602	3.20749	4.17016	7.9423	1.23515	4.40359	6.86142	3.6579	4.90943	2.96682	5.39835	2.98137	3.25507
haemolyticus	0	0	2.39253	0	0	0	0	0	0	0	0	0	2.76076	0	2.82297	4.38718	0.966747	2.31315	0	1.77592	0	1.91471	2.06152	1.19742	3.34379	0	0	0	0	3.18595	0	0	1.33064	1.61297	1.44591	5.80334
infantis	4.84328	0	4.90232	0	0	0	0	0	5.56059	0	0	0	0	2.88307	1.59713	5.35229	3.63844	3.98971	3.10028	5.31444	4.17456	0	6.48991	3.80043	4.04959	2.80757	1.90189	6.26355	0	0	0	0	0	0	0	0
lwoffii	6.21606	5.68409	5.19796	6.14432	3.32917	6.06888	4.27264	5.80412	4.59084	9.29179	5.71138	6.8068	7.39702	8.01242	7.45273	6.40406	8.1424	5.57421	4.19506	6.31828	4.3457	7.18966	6.16775	5.05885	4.27093	5.24817	3.87628	6.1023	0	0	0	2.58026	0	0	0	4.6965
muciniphila	13.6096	14.7034	14.5796	15.2022	16.9773	16.9231	16.9742	17.211	15.1616	13.7972	16.7275	13.7746	16.0941	14.3902	14.5607	13.472	16.3782	14.9812	14.0855	14.4744	15.5336	14.9413	14.2027	14.2649	16.4958	16.006	17.1429	16.0337	16.7057	13.74	15.513	12.6435	15.2699	16.0404	14.2288	15.2894
oleronius	0	0	0	0	0	0	0	0	0	0	0	0	0	0	0	0	0	0	0	0	0	0	0	0	0	0	0	0	0	3.61071	0	0	0	0	0	0
perfringens	0.859877	4.21761	1.82801	0	1.00403	1.80548	0	0	4.59084	5.26228	0	0	0	0	0	0	0	0	0	0	6.45	0	0	2.28685	0.937546	3.58519	0	0	0	0	2.28513	3.83605	4.52165	5.08495	2.32868	4.61498
prausnitzii	1.39493	0	0	1.0516	0	0	0	0	0	2.36551	0	0	0	0	0	0	0	0	1.05816	0	0	0	1.0413	0	0	0	0	0	0	1.80425	0	0	0	0	0	0
producta	11.6007	12.4945	11.992	9.99915	11.9025	8.11243	9.82378	10.5806	13.4464	13.2444	9.31156	14.146	12.5283	11.6799	11.3452	12.7717	11.0471	10.7118	13.4607	12.103	11.528	13.4726	14.0238	13.8681	8.04265	7.51595	8.4226	10.2792	10.9837	13.2287	10.1903	10.7044	10.7833	12.0988	12.2296	12.1267
psychrophilus	0.859877	0	5.65274	1.0516	0	3.6123	0.845496	0	4.50171	7.85924	2.07459	4.20203	5.56133	9.16194	7.93102	9.04174	6.7535	0	9.43356	0	5.08656	3.06828	5.69455	5.49096	1.90528	4.5238	4.12285	1.23515	2.3314	5.00701	0	0	0	0	0	0
reuteri	9.27874	6.12555	4.23674	8.04938	3.17708	7.80152	8.67316	4.7338	8.45861	5.70665	4.64914	3.81288	7.10575	1.64419	7.62544	9.7344	6.06298	3.31205	4.50114	7.58901	2.1413	4.34998	8.01777	7.5783	6.19586	5.4921	4.42812	7.93505	6.13209	9.05331	9.00107	8.4802	4.37133	5.39835	5.89791	3.86126
schaedleri	11.468	10.7621	8.74929	11.4894	7.53157	4.20697	6.59434	7.47426	11.6639	3.41834	6.60536	7.5386	9.39884	11.8965	8.55343	8.56827	4.3283	15.111	11.833	15.4478	11.8811	5.53137	12.5404	6.53643	9.60374	9.26234	4.12285	10.2949	6.50584	10.9024	4.77994	9.74842	9.62641	7.40788	7.95844	9.61299
sciuri	5.54329	5.63846	7.51517	0	1.00403	3.6123	1.37505	0	4.40672	7.49967	2.07459	4.50819	2.76076	6.46197	2.33651	8.67058	4.6358	0	6.92043	3.714	3.98035	2.23077	8.27594	4.35046	1.90528	0	0	4.21745	2.15601	3.68249	0	0	0	2.53701	0	2.39878
stationis	0	0	5.91912	0	0	0	0	0	6.63177	7.24702	1.3819	4.63992	2.76076	5.2951	5.30314	6.33453	5.63447	0	8.71369	0	3.4899	0	5.3273	1.84261	0	0	4.51704	0	1.10586	4.9206	0	0	0	0	0	0.775904
torques	13.114	12.9306	12.4475	9.07563	10.5968	9.13566	8.76587	10.9549	14.2526	13.6695	11.0118	12.7976	10.6623	12.4314	12.609	13.3657	12.5869	12.5924	13.003	14.0201	14.0081	13.825	10.7316	14.4245	10.1	9.29257	11.6311	12.7367	12.1756	14.0354	12.7875	12.3621	14.1222	13.2791	12.7811	13.2724
uniformis	8.27917	8.65932	5.4985	9.25352	8.92689	8.11243	7.94042	8.33508	8.97963	10.1762	9.00831	12.0473	11.7984	6.46197	7.84467	7.30753	6.99931	7.54367	6.24177	8.56231	7.21757	10.3083	8.06983	6.47483	7.19503	7.03367	6.67624	10.1039	10.0172	9.24921	9.73472	7.932	9.82504	11.0837	8.83361	10.4758
veronii	0	0	0	1.65335	0	0	0	0	0	0	0	0	0	0	0	0	0	1.57765	0	0	0	0	0	0	0	0	0	0	0	0	0	0	0	0	0	0
