# Supplementary material for: Pediococcus acidilactici (pA1c®) alleviates obesity-related dyslipidemia and inflammation in Wistar rats by activating beta-oxidation and modulating the gut microbiota
Source: Royal Society of Chemistry journal article supplement (doi:10.1039/d3fo01651j), 2023-01-01
Supplement: d3fo01651j4.pdf [file d3fo01651j4.pdf]

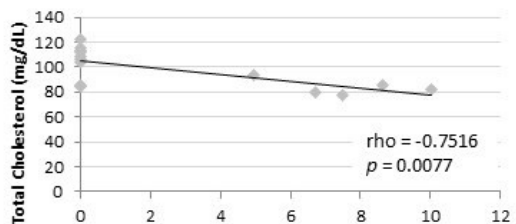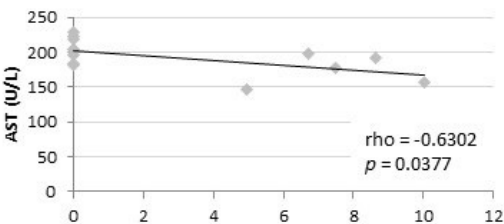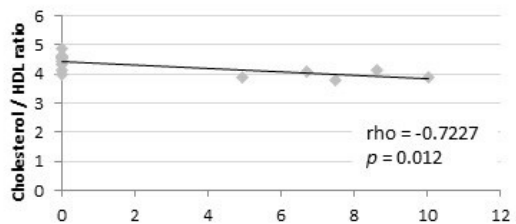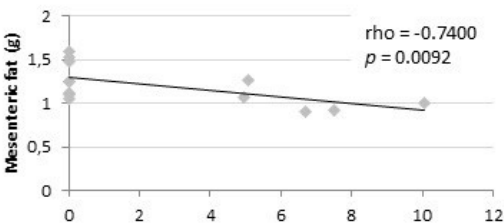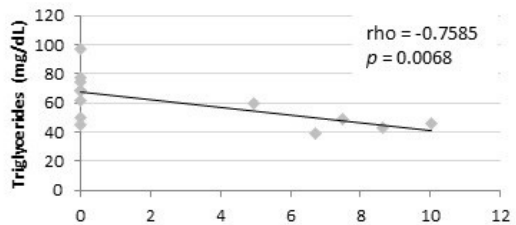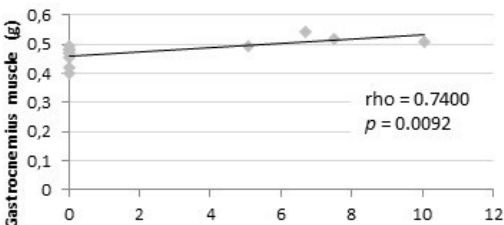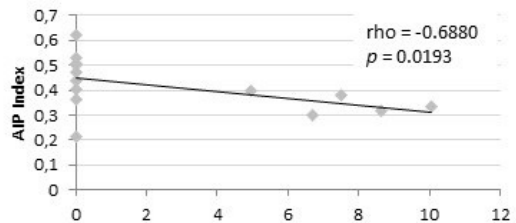

Supplementary Figure 1. Correlation analyses between *Pediococcus acidilactici* species and biochemical parameters.
