# Supplementary material for: Pediococcus acidilactici (pA1c®) alleviates obesity-related dyslipidemia and inflammation in Wistar rats by activating beta-oxidation and modulating the gut microbiota
Source: Royal Society of Chemistry journal article supplement (doi:10.1039/d3fo01651j), 2023-01-01
Supplement: d3fo01651j5.pdf [file d3fo01651j5.pdf]

## Supplementary Table 1. Specific macronutrient composition of the diets

|                                                           | CNT (n=8) | HFS (n=11) | pA1c <sup>®</sup> (n=10) |
|-----------------------------------------------------------|-----------|------------|--------------------------|
| <b>Energy density (kcal/g)</b>                            | 2.9       | 4.7        | 4.7                      |
| <b>Nutrients</b>                                          |           |            |                          |
| Protein                                                   | 20        | 20         | 20                       |
| Carbohydrate                                              | 67        | 35         | 35                       |
| Fat                                                       | 13        | 45         | 45                       |
| <b><i>Pediococcus acidilactici</i><br/>(CFU/day/mice)</b> | -         | -          | 10 <sup>10</sup>         |
