# Supplementary material for: Pediococcus acidilactici (pA1c®) alleviates obesity-related dyslipidemia and inflammation in Wistar rats by activating beta-oxidation and modulating the gut microbiota
Source: Royal Society of Chemistry journal article supplement (doi:10.1039/d3fo01651j), 2023-01-01
Supplement: d3fo01651j6.pdf [file d3fo01651j6.pdf]

**Supplementary table 2:** Network enrichment pathways obtained from metagenomics between CECT and HFS groups comparison.

| Pathway                                     | Size | Hits | Statistic Q | Expected Q | Pval    | Holm p | FDR     |
|---------------------------------------------|------|------|-------------|------------|---------|--------|---------|
| Sphingolipid metabolism                     | 3    | 3    | 26.99644    | 7.14286    | 0.01590 | 1      | 0.26479 |
| Glutathione metabolism                      | 5    | 5    | 26.61082    | 7.14286    | 0.02869 | 1      | 0.26479 |
| Galactose metabolism                        | 13   | 13   | 18.07580    | 7.14286    | 0.04668 | 1      | 0.26479 |
| Cysteine and methionine metabolism          | 25   | 25   | 18.37326    | 7.14286    | 0.05522 | 1      | 0.26479 |
| Pantothenate and CoA biosynthesis           | 13   | 13   | 23.46584    | 7.14286    | 0.05971 | 1      | 0.26479 |
| Methane metabolism                          | 40   | 40   | 18.71696    | 7.14286    | 0.06433 | 1      | 0.26479 |
| O-Antigen nucleotide sugar biosynthesis     | 17   | 17   | 20.42667    | 7.14286    | 0.06554 | 1      | 0.26479 |
| Tryptophan metabolism                       | 10   | 10   | 21.42415    | 7.14286    | 0.06911 | 1      | 0.26479 |
| Amino sugar and nucleotide sugar metabolism | 28   | 28   | 17.15089    | 7.14286    | 0.07425 | 1      | 0.26479 |
| Selenocompound metabolism                   | 6    | 6    | 17.17711    | 7.14286    | 0.07538 | 1      | 0.26479 |
| Taurine and hypotaurine metabolism          | 3    | 3    | 21.57660    | 7.14286    | 0.07936 | 1      | 0.26479 |
| Drug metabolism - other enzymes             | 12   | 12   | 18.01424    | 7.14286    | 0.08323 | 1      | 0.26479 |
| D-Amino acid metabolism                     | 4    | 4    | 21.13248    | 7.14286    | 0.08462 | 1      | 0.26479 |
| Caprolactam degradation                     | 4    | 4    | 20.21817    | 7.14286    | 0.08530 | 1      | 0.26479 |
| Lipoarabinomannan (LAM) biosynthesis        | 2    | 2    | 20.90599    | 7.14286    | 0.08636 | 1      | 0.26479 |
| Valine, leucine and isoleucine biosynthesis | 9    | 9    | 20.44619    | 7.14286    | 0.08737 | 1      | 0.26479 |
| Nitrotoluene degradation                    | 2    | 2    | 20.23091    | 7.14286    | 0.08891 | 1      | 0.26479 |
| One carbon pool by folate                   | 7    | 7    | 20.33970    | 7.14286    | 0.08931 | 1      | 0.26479 |
| Phenylpropanoid biosynthesis                | 2    | 2    | 20.00892    | 7.14286    | 0.09074 | 1      | 0.26479 |
| Dioxin degradation                          | 2    | 2    | 20.37957    | 7.14286    | 0.09110 | 1      | 0.26479 |
| Glucosinolate biosynthesis                  | 2    | 2    | 20.11038    | 7.14286    | 0.09282 | 1      | 0.26479 |
| Lipopolysaccharide biosynthesis             | 4    | 4    | 20.17419    | 7.14286    | 0.09294 | 1      | 0.26479 |
| Pyrimidine metabolism                       | 29   | 29   | 16.82990    | 7.14286    | 0.09369 | 1      | 0.26479 |
| Monobactam biosynthesis                     | 5    | 5    | 19.50824    | 7.14286    | 0.09398 | 1      | 0.26479 |
| Riboflavin metabolism                       | 13   | 13   | 17.15793    | 7.14286    | 0.09429 | 1      | 0.26479 |
| C5-Branched dibasic acid metabolism         | 5    | 5    | 19.41669    | 7.14286    | 0.09511 | 1      | 0.26479 |
| N-Glycan biosynthesis                       | 3    | 3    | 17.94041    | 7.14286    | 0.09772 | 1      | 0.26479 |
| Fatty acid degradation                      | 13   | 13   | 16.27849    | 7.14286    | 0.09776 | 1      | 0.26479 |
| Purine metabolism                           | 39   | 39   | 17.02769    | 7.14286    | 0.10222 | 1      | 0.26479 |
| Glycerolipid metabolism                     | 7    | 7    | 14.11873    | 7.14286    | 0.10230 | 1      | 0.26479 |
| Glycolysis / Gluconeogenesis                | 25   | 25   | 14.51119    | 7.14286    | 0.10363 | 1      | 0.26479 |
| Naphthalene degradation                     | 4    | 4    | 16.84058    | 7.14286    | 0.11103 | 1      | 0.26479 |
| Fatty acid biosynthesis                     | 6    | 6    | 17.87427    | 7.14286    | 0.11200 | 1      | 0.26479 |
| Carbon fixation in photosynthetic organisms | 14   | 14   | 14.65313    | 7.14286    | 0.11315 | 1      | 0.26479 |
| Sulfur metabolism                           | 14   | 14   | 14.86219    | 7.14286    | 0.11370 | 1      | 0.26479 |
| Drug metabolism - cytochrome P450           | 4    | 4    | 16.52431    | 7.14286    | 0.11481 | 1      | 0.26479 |
| Arginine and proline metabolism             | 18   | 18   | 15.43635    | 7.14286    | 0.11597 | 1      | 0.26479 |
| Nitrogen metabolism                         | 12   | 12   | 14.30621    | 7.14286    | 0.11866 | 1      | 0.26479 |
| Acarbose and validamycin biosynthesis       | 2    | 2    | 17.48784    | 7.14286    | 0.11944 | 1      | 0.26479 |
